# Supplementary material
Source: bioRxiv or medRxiv preprint supplement (https://www.biorxiv.org/highwire/filestream/63501/field_highwire_adjunct_files/0/208686-1.pdf)
Supplement: Supplementary file [file 208686-1.pdf]

# Supplementary Figure 1

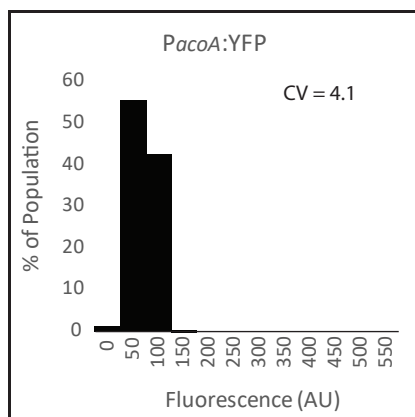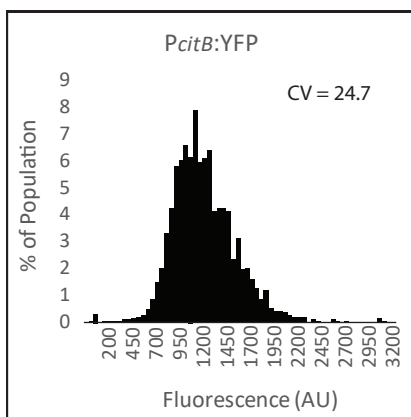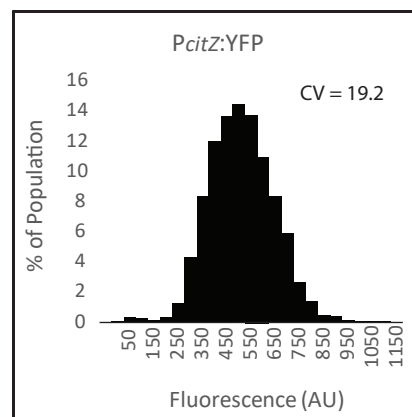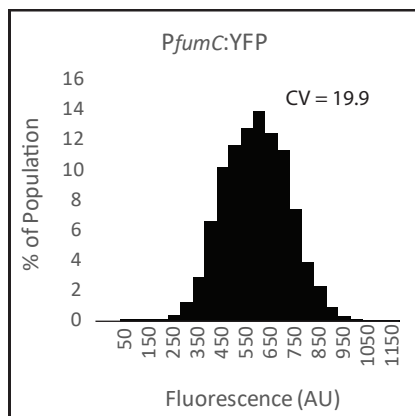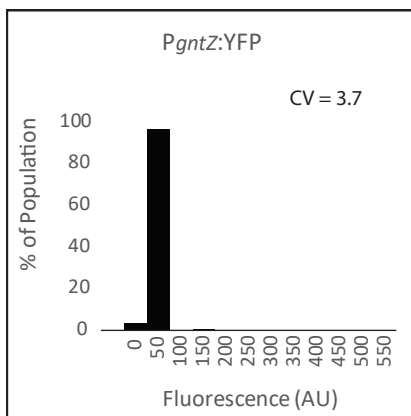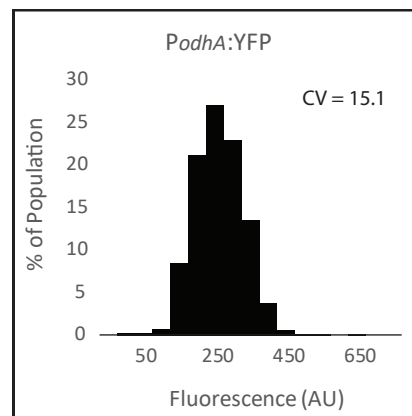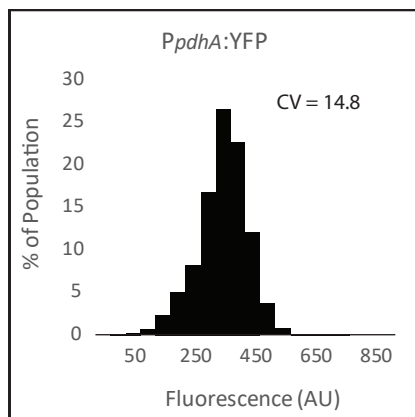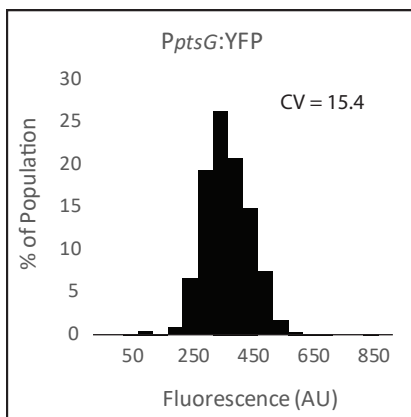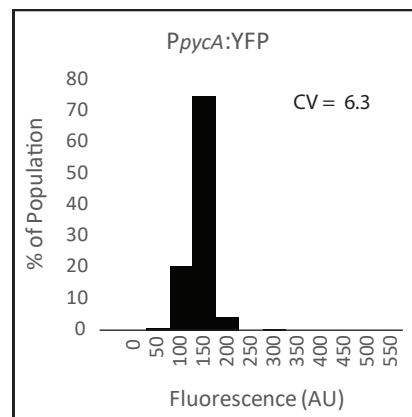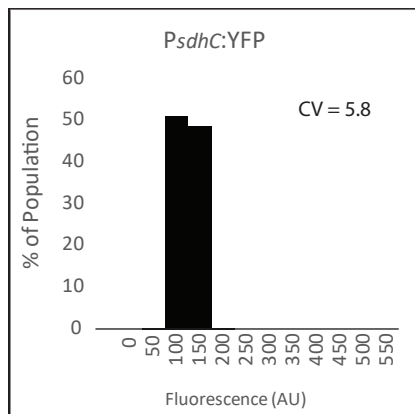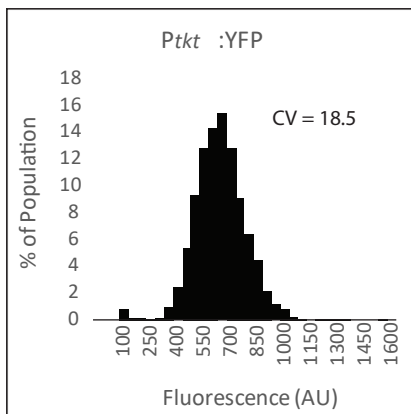

## Supplementary Figure 2

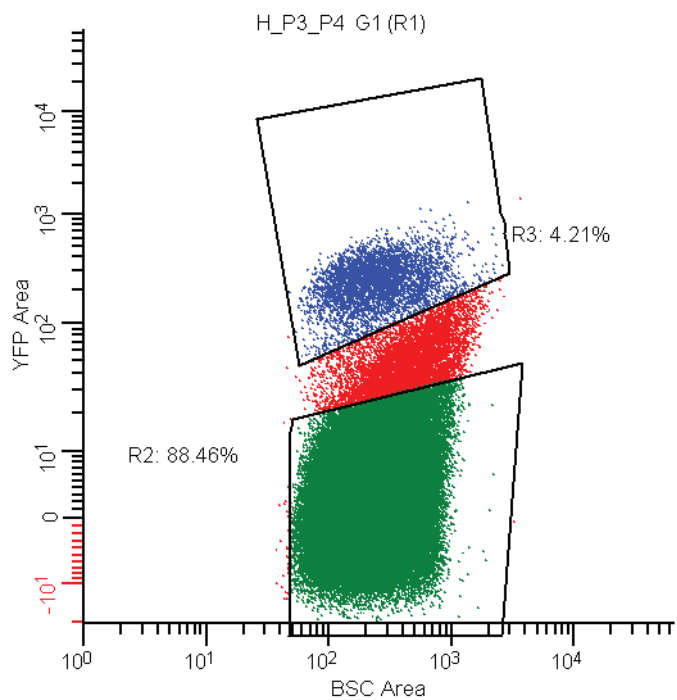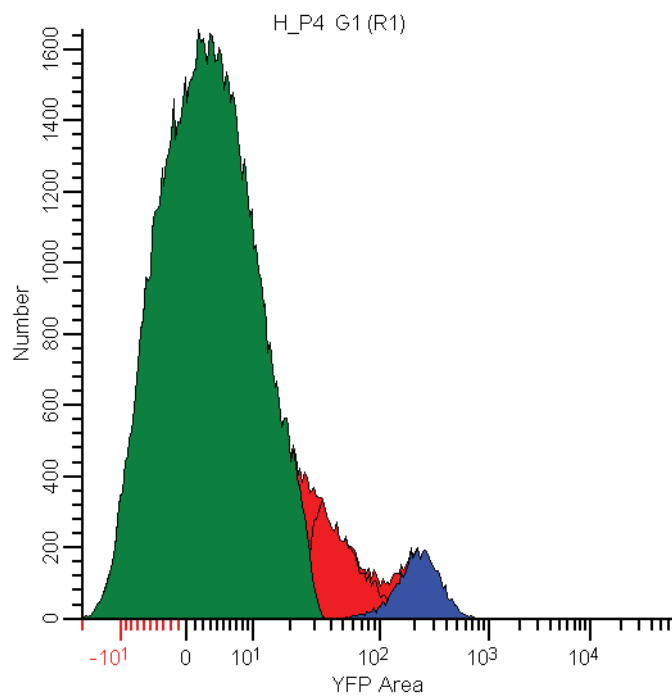

File: AR 12-07-11 Sample 2\_unknown\_111207

| Population | Events | %Total | %Parent |
|------------|--------|--------|---------|
| Ungated    | 100004 | 100.00 | 100.00  |
| G1         | 100000 | 99.99  | 99.99   |
| G2         | 88457  | 88.45  | 88.45   |
| G3         | 4210   | 4.21   | 4.21    |

G2 = "Normal-sorted"

G3 = "P<sub>suc</sub>C High sorted"

Supplementary Figure 3

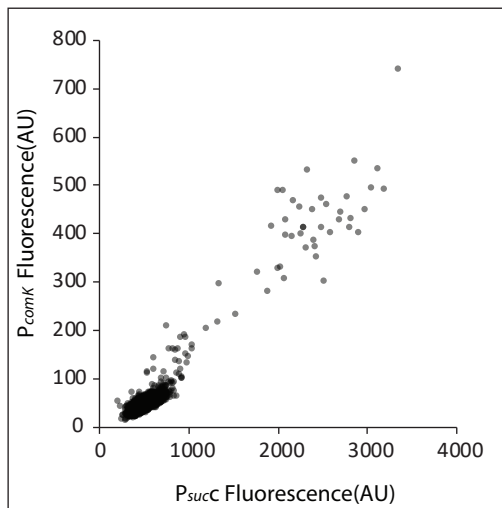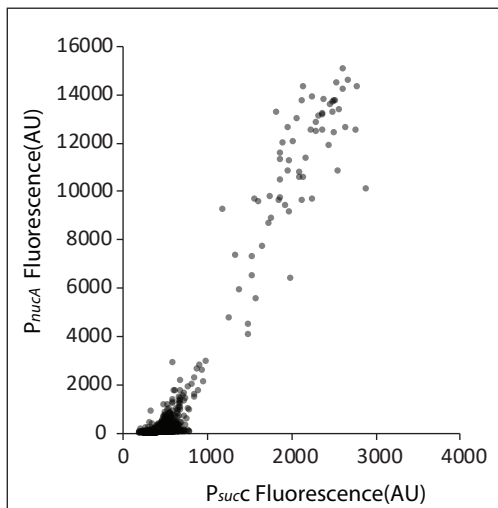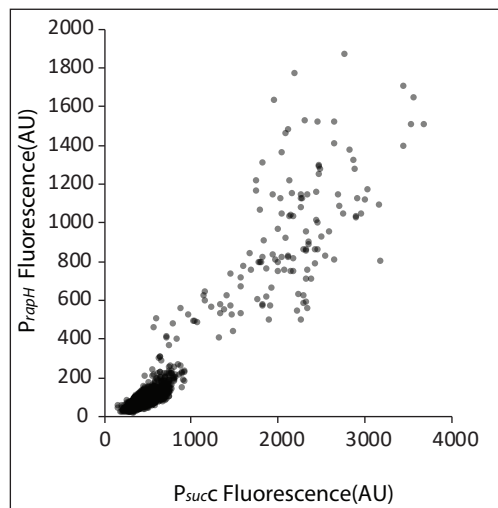

# Supplementary Figure 4

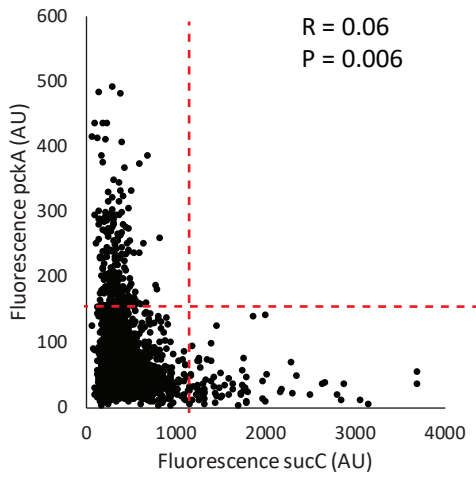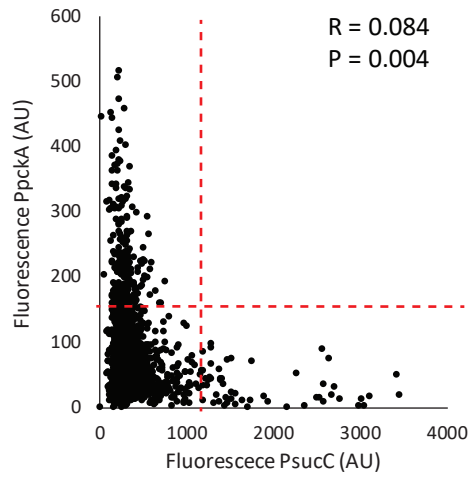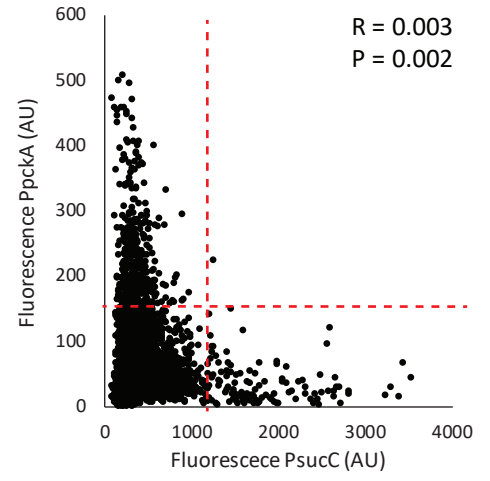



Supplementary Figure 5

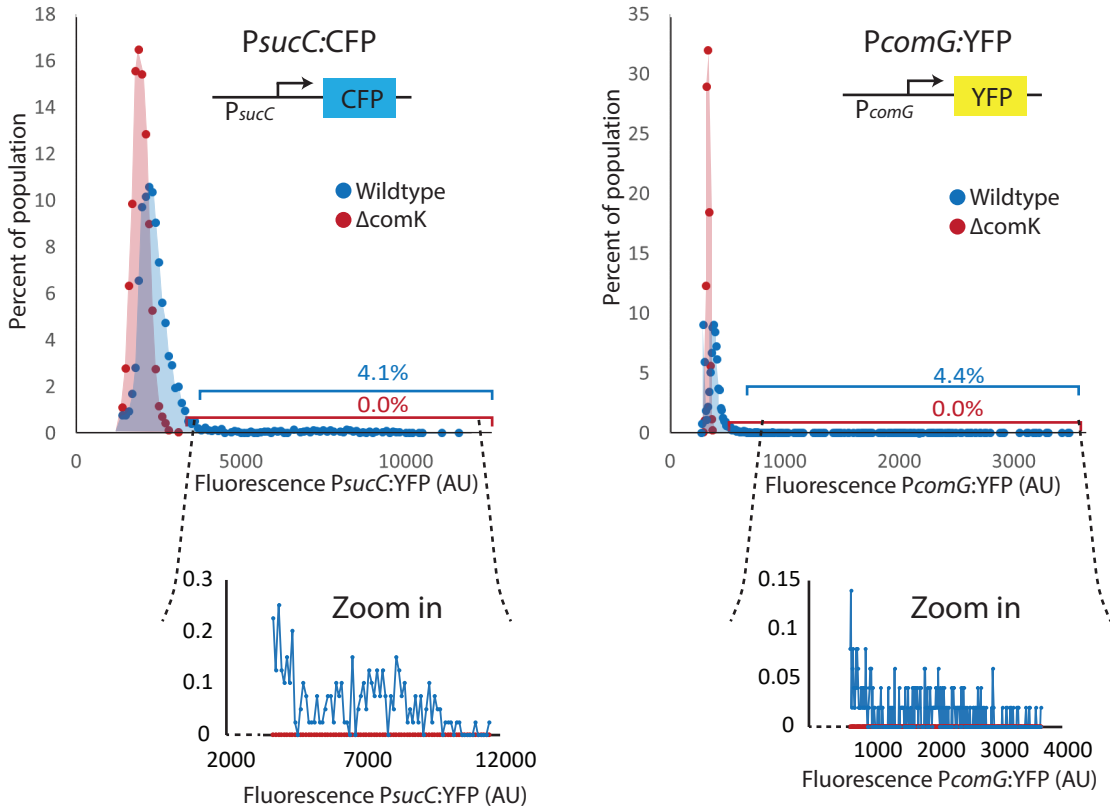

Supplementary Figure 6

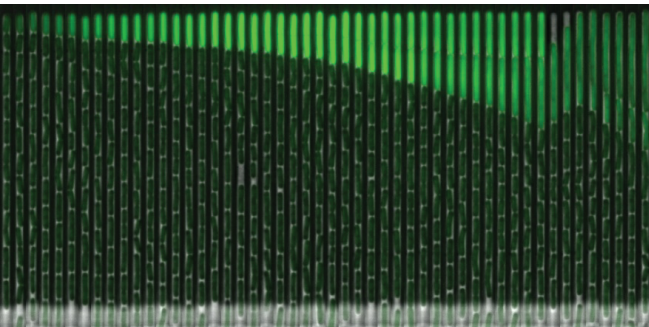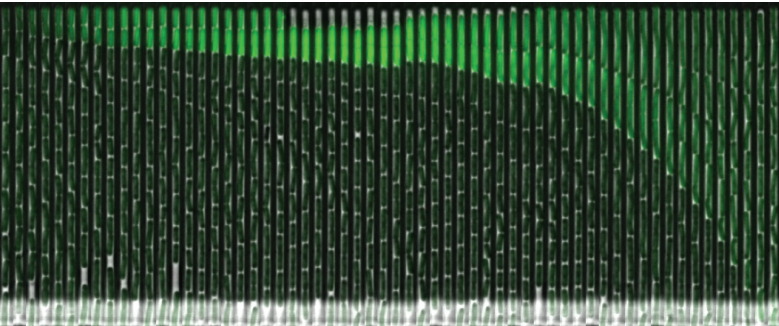

Supplementary Figure 7

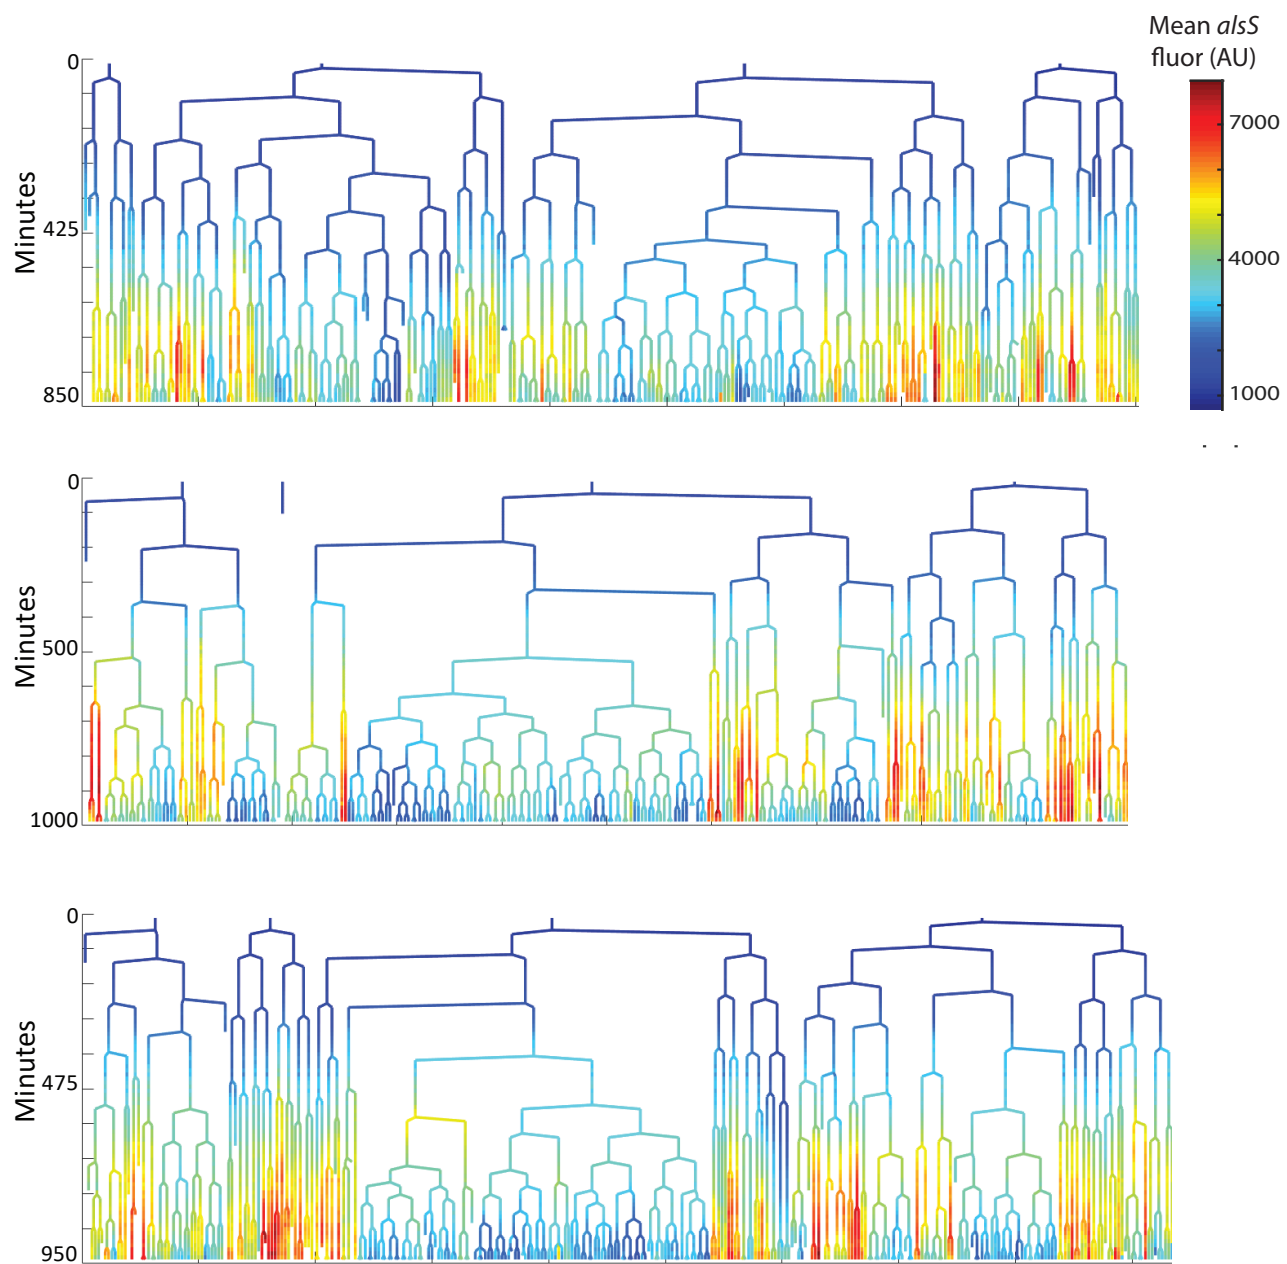

# Supplementary Figure 8

A

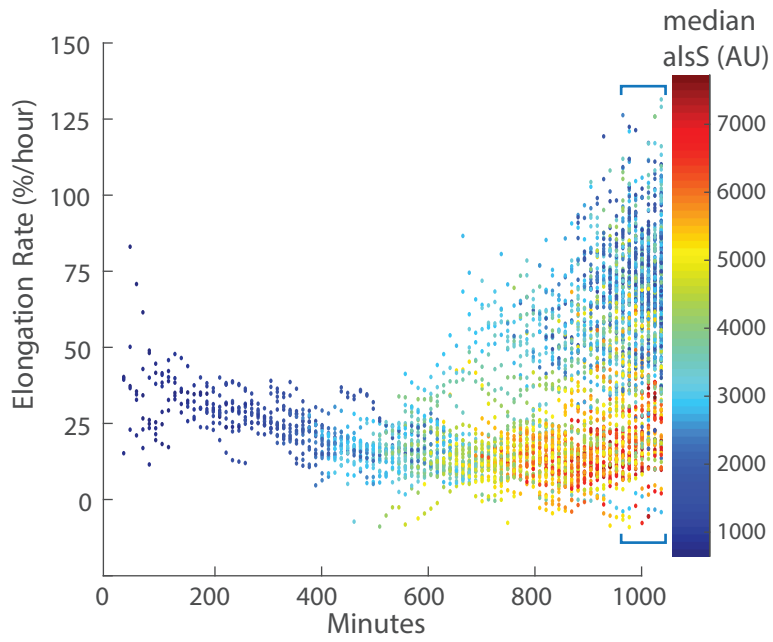

B

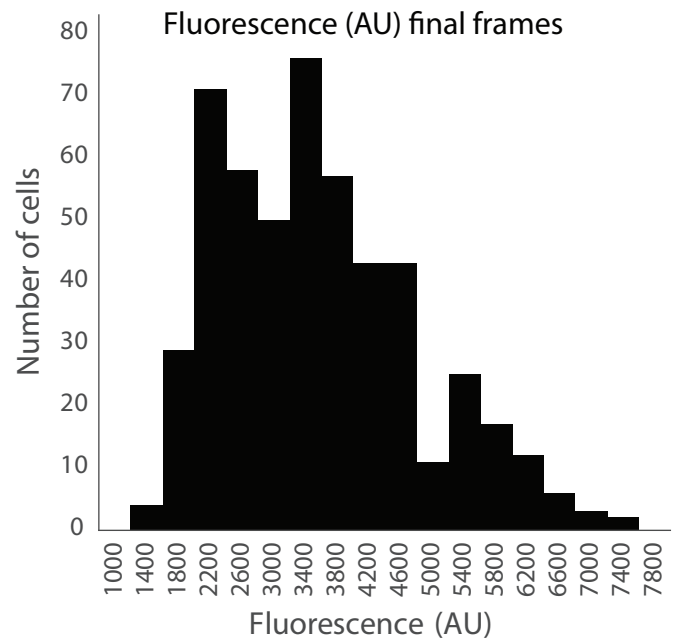

C

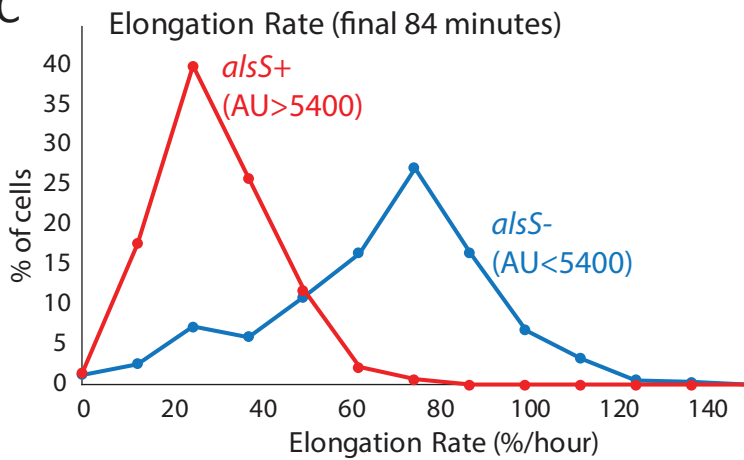

| Strain # | Strain name | Genotype                                     | Construction method                         | Physiological Characteristic and other notes                            | Reference / source                                                                           |
|----------|-------------|----------------------------------------------|---------------------------------------------|-------------------------------------------------------------------------|----------------------------------------------------------------------------------------------|
| 1        | PY79        | Prototrophic strain                          | Common lab strain                           |                                                                         | Youngman, P., Perkins, J.B. & Losick, R. 1984                                                |
| 2        | JJB176      | PB2;<br>ppsb::PtrpE-mCh<br>PhleoR            | Lab stock -<br>See Eldar et al. Nature 2009 |                                                                         | Eldar A, Chary VK, Xenopoulos P, Fontes ME, Losón OC, Dworkin J, Piggot PJ, Elowitz MB. 2009 |
| 3        | BS196       | amyE::Physpank-lytF SpectR, PY79 background. | Genomic DNA fro DS3290 into PY79            | non chaining strain (used to construct strains for motermachine movies) | DS3290 from Dan Kearns lab.                                                                  |
| 4        | AZREdel1    | PY 79 $\Delta$ alsS/D                        | BGSC BKE collection genomic DNA into PY79   | deletion of acetoin producing genes                                     | BGSC Bacillus collection                                                                     |
| 5        | AZREdel2    | PY79 $\Delta$ comK                           | BGSC BKE collection genomic DNA into PY79   | deletion of genetic competence                                          | BGSC Bacillus collection                                                                     |
| 6        | AZRE1       | JJB176;<br>sacA::PsucC-yfp<br>cmR            | Plasmid (1) above into JJB176               | YFP promoter reporter for sucC/D                                        | This work                                                                                    |
| 7        | AZRE2       | JJB176;<br>sacA::PalsS-yfp<br>cmR            | Plasmid (2) above into JJB176               | YFP promoter reporter for alsS/D                                        | This work                                                                                    |
| 8        | AZRE3       | JJB176;<br>sacA::PacoA-yfp<br>cmR            | Plasmid (3) above into JJB176               | YFP promoter reporter for acoA/B/C                                      | This work                                                                                    |
| 9        | AZRE4       | JJB176;<br>sacA::PcitB-yfp<br>cmR            | Plasmid (4) above into JJB176               | YFP promoter reporter for citB                                          | This work                                                                                    |
| 10       | AZRE5       | JJB176;<br>sacA::PcitZ-yfp<br>cmR            | Plasmid (5) above into JJB177               | YFP promoter reporter for citZ/icd/mdh                                  | This work                                                                                    |
| 11       | AZRE6       | JJB176;<br>sacA::PfumC-yfp<br>cmR            | Plasmid (6) above into JJB177               | YFP promoter reporter for fumC (citG)                                   | This work                                                                                    |

|    |        |                                   |                                                |                                                                  |           |
|----|--------|-----------------------------------|------------------------------------------------|------------------------------------------------------------------|-----------|
| 12 | AZRE7  | JJB176;<br>sacA::PgntZ-yfp<br>cmR | Plasmid (7)<br>above into<br>JJB177            | YFP promoter<br>reporter for<br>gntRKPZ                          | This work |
| 13 | AZRE8  | JJB176;<br>sacA::PodhA-yfp<br>cmR | Plasmid (8)<br>above into<br>JJB176            | YFP promoter<br>reporter for<br>odhA/B                           | This work |
| 14 | AZRE9  | JJB176;<br>sacA::PpdhA-yfp<br>cmR | Plasmid (9)<br>above into<br>JJB176            | YFP promoter<br>reporter for<br>pdhA/B/C/D                       | This work |
| 15 | AZRE10 | JJB176;<br>sacA::PptsG-yfp<br>cmR | Plasmid (10)<br>above into<br>JJB176           | YFP promoter<br>reporter for<br>ptsG/H/I                         | This work |
| 16 | AZRE11 | JJB176;<br>sacA::PpycA-yfp<br>cmR | Plasmid (11)<br>above into<br>JJB176           | YFP promoter<br>reporter for<br>ftsW/pycA                        | This work |
| 17 | AZRE13 | JJB176;<br>sacA::PsdhC-yfp<br>cmR | Plasmid (12)<br>above into<br>JJB176           | YFP promoter<br>reporter for<br>sdhC/A/B                         | This work |
| 18 | AZRE14 | JJB176;<br>sacA::PtkA-yfp<br>cmR  | Plasmid (13)<br>above into<br>JJB176           | YFP promoter<br>reporter for tkt                                 | This work |
| 19 | AZRE15 | JJB176;<br>sacA::Ppcka-yfp<br>cmR | Plasmid (14)<br>above into<br>JJB176           | YFP promoter<br>reporter for<br>pcka                             | This work |
| 20 | AZRE16 | JJB176;<br>sacA::PcomG-yfp<br>cmR | Plasmid (15)<br>above into<br>JJB177           | YFP promoter<br>reporter for<br>comG                             | This work |
| 21 | AZRE17 | JJB176;<br>sacA::PnucA-yfp<br>cmR | Plasmid (16)<br>above into<br>JJB177           | YFP promoter<br>reporter for<br>nucA                             | This work |
| 22 | AZRE18 | JJB176;<br>sacA::PrapH-yfp<br>cmR | Plasmid (17)<br>above into<br>JJB177           | YFP promoter<br>reporter for<br>rapH                             | This work |
| 23 | AZRE19 | JJB176;<br>sacA::PcomK-yfp<br>cmR | Plasmid (17)<br>above into<br>JJB177           | YFP promoter<br>reporter for<br>comK                             | This work |
| 24 | AZRE20 | AZRE1; $\Delta$ comK              | genomic DNA<br>from<br>AZREdel2 into<br>AZRE1  | deletion of<br>comK with<br>fluorescence<br>reporter for<br>sucC | This work |
| 25 | AZRE21 | AZRE16; $\Delta$ comK             | genomic DNA<br>from<br>AZREdel2 into<br>AZRE16 | deletion of<br>comK with<br>fluorescence<br>reporter for<br>comG | This work |

|    |        |                                                                      |                                          |                                                                                               |           |
|----|--------|----------------------------------------------------------------------|------------------------------------------|-----------------------------------------------------------------------------------------------|-----------|
| 26 | AZRE22 | PB2;<br>ppsb::PtrpE-mCh<br>PhleoR,<br>amyE::Physpank-<br>lytF SpectR | genomic DNA<br>from BS196<br>into JJB176 | non-chaining<br>strain with<br>constitutive RFP<br>reporter used<br>for movie<br>segmentation | This work |
| 27 | AZRE23 | AZRE21;<br>sacA::PsucC-yfp<br>cmR                                    | plasmid (1)<br>into AZRE22               | non-chaining<br>strain used for<br>PsucC mother<br>machine<br>movies                          | This work |
| 28 | AZRE24 | AZRE21;<br>sacA::PalsS-yfp<br>cmR                                    | plasmid (2)<br>into AZRE22               | non-chaining<br>strain used for<br>PalsS mother<br>machine<br>movies                          | This work |
| 29 | AZRE25 | JJB176;<br>amyE::PsucC-cfp<br>specR                                  | plasmid (18)<br>into JJB176              |                                                                                               | This work |
| 30 | AZRE26 | JJB176;<br>amyE::PalsS-cfp<br>specR                                  | plasmid (19)<br>into JJB176              |                                                                                               | This work |
| 31 | AZRE27 | AZRE25;<br>sacA::PcomG-yfp<br>cmR                                    | Genomic DNA<br>(AZRE16) into<br>AZRE25   | 2 reporter<br>strain for comG<br>and sucC                                                     | This work |
| 32 | AZRE28 | AZRE25;<br>sacA::PcomK-yfp<br>cmR                                    | Genomic DNA<br>(AZRE19) into<br>AZRE25   | 2 reporter<br>strain for comK<br>and sucC                                                     | This work |
| 33 | AZRE29 | AZRE25;<br>sacA::PrapH-yfp<br>cmR                                    | Genomic DNA<br>(AZRE18) into<br>AZRE25   | 2 reporter<br>strain for rapH<br>and sucC                                                     | This work |
| 34 | AZRE30 | AZRE25;<br>sacA::PnucA-yfp<br>cmR                                    | Genomic DNA<br>(AZRE17) into<br>AZRE25   | 2 reporter<br>strain for nuCA<br>and sucC                                                     | This work |
| 35 | AZRE31 | AZRE25;<br>sacA::Ppcka-yfp<br>cmR                                    | Genomic DNA<br>(AZRE15) into<br>AZRE25   | 2 reporter<br>strain for pcka<br>and sucC                                                     | This work |
| 36 | AZRE32 | AZRE27; $\Delta$ comK                                                | Genomic DNA<br>(AZREdel2)<br>into AZRE27 | 2 reporter<br>strain for comG<br>and sucC with<br>comK deletion                               | This work |

| Table S2 | value_alsS<br>High sorted | value_alsS<br>Normal sorted | log2(fold<br>change) | test_stat | p_value  | q_value  | significant |
|----------|---------------------------|-----------------------------|----------------------|-----------|----------|----------|-------------|
| ywfM     | 1039.76                   | 64.9314                     | -4.00119             | -15.9799  | 5.00E-05 | 0.000541 | yes         |
| comEA    | 455.242                   | 30.8855                     | -3.88163             | -14.6287  | 5.00E-05 | 0.000541 | yes         |
| ydeE     | 27.7838                   | 1.92265                     | -3.85307             | -9.97327  | 5.00E-05 | 0.000541 | yes         |
| comGA    | 1234.72                   | 88.7467                     | -3.79835             | -15.0813  | 5.00E-05 | 0.000541 | yes         |
| comER    | 128.126                   | 9.33183                     | -3.77926             | -13.4502  | 5.00E-05 | 0.000541 | yes         |
| cysL     | 359.231                   | 27.6437                     | -3.69989             | -13.8555  | 5.00E-05 | 0.000541 | yes         |
| comFC    | 197.191                   | 15.5118                     | -3.66816             | -10.8336  | 5.00E-05 | 0.000541 | yes         |
| ssbB     | 2298.59                   | 183.662                     | -3.64563             | -13.7692  | 5.00E-05 | 0.000541 | yes         |
| comFB    | 597.302                   | 48.5213                     | -3.62177             | -8.55611  | 5.00E-05 | 0.000541 | yes         |
| lipL     | 327.945                   | 26.9775                     | -3.60363             | -13.5402  | 5.00E-05 | 0.000541 | yes         |
| comFA    | 226.99                    | 18.9108                     | -3.58535             | -13.4701  | 5.00E-05 | 0.000541 | yes         |
| maf      | 627.114                   | 52.5204                     | -3.57778             | -13.4335  | 5.00E-05 | 0.000541 | yes         |
| comEB    | 219.48                    | 18.9629                     | -3.53284             | -12.9476  | 5.00E-05 | 0.000541 | yes         |
| comGB    | 549.288                   | 48.1125                     | -3.51308             | -13.5514  | 5.00E-05 | 0.000541 | yes         |
| coiA     | 12.668                    | 1.12146                     | -3.49774             | -8.43354  | 5.00E-05 | 0.000541 | yes         |
| comGD    | 474.702                   | 42.8653                     | -3.46914             | -7.50482  | 5.00E-05 | 0.000541 | yes         |
| ybdK     | 218.626                   | 20.0358                     | -3.44781             | -13.2154  | 5.00E-05 | 0.000541 | yes         |
| comGC    | 754.378                   | 77.8975                     | -3.27564             | -5.96845  | 5.00E-05 | 0.000541 | yes         |
| cwlJ     | 136.113                   | 14.7701                     | -3.20406             | -10.4176  | 5.00E-05 | 0.000541 | yes         |
| rapH     | 443.959                   | 52.9302                     | -3.06826             | -11.5709  | 5.00E-05 | 0.000541 | yes         |
| radC     | 280.359                   | 33.4645                     | -3.06657             | -11.9709  | 5.00E-05 | 0.000541 | yes         |
| med      | 57.9287                   | 6.96087                     | -3.05694             | -10.7107  | 5.00E-05 | 0.000541 | yes         |
| comGE    | 841.508                   | 101.255                     | -3.05498             | -7.28545  | 5.00E-05 | 0.000541 | yes         |
| sacX     | 25.5097                   | 3.22108                     | -2.98543             | -9.90935  | 5.00E-05 | 0.000541 | yes         |
| comC     | 138.676                   | 17.8975                     | -2.95389             | -11.3442  | 5.00E-05 | 0.000541 | yes         |
| ydeC     | 5.99679                   | 0.809302                    | -2.88944             | -5.27552  | 5.00E-05 | 0.000541 | yes         |
| hxIR     | 157.418                   | 22.304                      | -2.81923             | -9.24866  | 5.00E-05 | 0.000541 | yes         |
| hxIA     | 76.8043                   | 10.9232                     | -2.81379             | -9.65197  | 5.00E-05 | 0.000541 | yes         |
| hxIB     | 82.3352                   | 11.8009                     | -2.80261             | -9.44087  | 5.00E-05 | 0.000541 | yes         |
| yckA     | 13.0086                   | 1.98789                     | -2.71016             | -6.09406  | 5.00E-05 | 0.000541 | yes         |
| dinB     | 26.6226                   | 4.17514                     | -2.67275             | -6.797    | 5.00E-05 | 0.000541 | yes         |
| comGF    | 550.022                   | 95.3113                     | -2.52877             | -9.99312  | 5.00E-05 | 0.000541 | yes         |
| yvyF     | 366.704                   | 67.836                      | -2.43449             | -9.64192  | 5.00E-05 | 0.000541 | yes         |
| comZ     | 253.434                   | 47.8843                     | -2.40398             | -5.88188  | 5.00E-05 | 0.000541 | yes         |
| recA     | 189.19                    | 36.8014                     | -2.362               | -9.26561  | 5.00E-05 | 0.000541 | yes         |
| nin      | 196.309                   | 38.9199                     | -2.33454             | -8.70138  | 5.00E-05 | 0.000541 | yes         |
| yvyG     | 316.225                   | 62.8094                     | -2.3319              | -9.29179  | 5.00E-05 | 0.000541 | yes         |
| yckB     | 22.6411                   | 4.67187                     | -2.27687             | -7.23202  | 5.00E-05 | 0.000541 | yes         |
| flgM     | 503.679                   | 105.652                     | -2.25318             | -8.42297  | 5.00E-05 | 0.000541 | yes         |
| yviA     | 50.0073                   | 10.5138                     | -2.24985             | -8.20951  | 5.00E-05 | 0.000541 | yes         |
| yndK     | 45.2452                   | 9.70191                     | -2.22142             | -5.86401  | 5.00E-05 | 0.000541 | yes         |
| nucA     | 439.964                   | 94.5699                     | -2.21793             | -8.82789  | 5.00E-05 | 0.000541 | yes         |
| ywpJ     | 69.7982                   | 15.149                      | -2.20397             | -8.50446  | 5.00E-05 | 0.000541 | yes         |
| yviE     | 38.2715                   | 8.48071                     | -2.17401             | -6.91235  | 5.00E-05 | 0.000541 | yes         |



| Table S2 | value_alsS<br>High sorted | value_alsS<br>Normal sorted | log2(fold<br>change) | test_stat | p_value  | q_value  | significant |
|----------|---------------------------|-----------------------------|----------------------|-----------|----------|----------|-------------|
| yckC     | 33.3864                   | 7.47895                     | -2.15835             | -6.01264  | 5.00E-05 | 0.000541 | yes         |
| yckD     | 114.242                   | 25.8348                     | -2.1447              | -6.91869  | 5.00E-05 | 0.000541 | yes         |
| yndJ     | 23.5029                   | 5.34028                     | -2.13785             | -7.39969  | 5.00E-05 | 0.000541 | yes         |
| jag      | 189.854                   | 43.6302                     | -2.12149             | -6.48602  | 5.00E-05 | 0.000541 | yes         |
| flgK     | 228.329                   | 54.1075                     | -2.07722             | -7.87523  | 5.00E-05 | 0.000541 | yes         |
| comEC    | 26.3987                   | 6.28179                     | -2.07122             | -8.16785  | 5.00E-05 | 0.000541 | yes         |
| oxdC     | 5.3969                    | 1.30919                     | -2.04345             | -4.90644  | 5.00E-05 | 0.000541 | yes         |
| pta      | 229.489                   | 56.358                      | -2.02573             | -7.86575  | 5.00E-05 | 0.000541 | yes         |
| flgL     | 235.075                   | 58.1416                     | -2.01548             | -7.90934  | 5.00E-05 | 0.000541 | yes         |
| yhzC     | 187.837                   | 47.313                      | -1.98917             | -5.81335  | 5.00E-05 | 0.000541 | yes         |
| ywtF     | 53.5113                   | 14.6882                     | -1.86519             | -7.28557  | 5.00E-05 | 0.000541 | yes         |
| comGG    | 361.416                   | 100.34                      | -1.84876             | -7.38081  | 5.00E-05 | 0.000541 | yes         |
| aroC     | 22.6776                   | 6.67345                     | -1.76477             | -5.77267  | 5.00E-05 | 0.000541 | yes         |
| bdbD     | 84.121                    | 26.9318                     | -1.64316             | -6.46415  | 5.00E-05 | 0.000541 | yes         |
| yqzE     | 174.336                   | 57.0506                     | -1.61156             | -3.71416  | 5.00E-05 | 0.000541 | yes         |
| yqeF     | 30.7946                   | 10.5905                     | -1.53991             | -5.39105  | 5.00E-05 | 0.000541 | yes         |
| yhcE     | 10.7067                   | 3.69761                     | -1.53385             | -4.21815  | 5.00E-05 | 0.000541 | yes         |
| comK     | 99.4248                   | 34.6326                     | -1.52148             | -5.98981  | 5.00E-05 | 0.000541 | yes         |
| fliW     | 20.689                    | 7.28563                     | -1.50574             | -3.65923  | 5.00E-05 | 0.000541 | yes         |
| ycbP     | 256.193                   | 92.9485                     | -1.46272             | -5.83834  | 5.00E-05 | 0.000541 | yes         |
| topA     | 41.8311                   | 15.2397                     | -1.45675             | -5.87205  | 5.00E-05 | 0.000541 | yes         |
| mtlR     | 2.56178                   | 1.1548                      | -1.1495              | -3.10627  | 5.00E-05 | 0.000541 | yes         |
| bdbC     | 41.2473                   | 19.4236                     | -1.08649             | -3.5098   | 5.00E-05 | 0.000541 | yes         |
| rnpA     | 68.9106                   | 33.6578                     | -1.03379             | -3.46651  | 5.00E-05 | 0.000541 | yes         |
| sucC     | 325.749                   | 161.324                     | -1.0138              | -3.80169  | 5.00E-05 | 0.000541 | yes         |
| mreB     | 85.6489                   | 50.7401                     | -0.75531             | -3.05962  | 5.00E-05 | 0.000541 | yes         |
| yndG     | 12.0243                   | 6.86995                     | -0.80759             | -2.54823  | 0.0005   | 0.004103 | yes         |
| yfhB     | 22.9053                   | 12.6865                     | -0.85238             | -3.18256  | 5.00E-05 | 0.000541 | yes         |
| pstS     | 8.69518                   | 0.376289                    | -4.5303              | -6.32059  | 5.00E-05 | 0.000541 | yes         |
| tcyK     | 13.2307                   | 0.84775                     | -3.96411             | -7.20245  | 5.00E-05 | 0.000541 | yes         |
| ybdM     | 143.125                   | 9.2849                      | -3.94624             | -12.3509  | 5.00E-05 | 0.000541 | yes         |
| htrA     | 94.0732                   | 6.62709                     | -3.82734             | -14.136   | 5.00E-05 | 0.000541 | yes         |
| ypbG     | 17.4868                   | 1.23608                     | -3.82242             | -8.01488  | 5.00E-05 | 0.000541 | yes         |
| htrB     | 110.507                   | 7.95039                     | -3.79697             | -14.2749  | 5.00E-05 | 0.000541 | yes         |
| yqjL     | 37.5666                   | 3.15044                     | -3.57583             | -10.0827  | 5.00E-05 | 0.000541 | yes         |
| tcyJ     | 6.24011                   | 0.571741                    | -3.44814             | -5.33103  | 5.00E-05 | 0.000541 | yes         |
| ycbR     | 229.757                   | 23.1381                     | -3.31176             | -12.8271  | 5.00E-05 | 0.000541 | yes         |
| ybcC     | 1.94238                   | 0.199732                    | -3.28168             | -5.67958  | 5.00E-05 | 0.000541 | yes         |
| ydeD     | 12.1276                   | 1.25787                     | -3.26924             | -7.55553  | 5.00E-05 | 0.000541 | yes         |
| sacY     | 58.3322                   | 6.0703                      | -3.26445             | -10.9088  | 5.00E-05 | 0.000541 | yes         |
| relQ     | 18.4362                   | 2.02461                     | -3.18683             | -7.05221  | 5.00E-05 | 0.000541 | yes         |
| maeA     | 168.006                   | 18.8112                     | -3.15885             | -11.9075  | 5.00E-05 | 0.000541 | yes         |
| ydaH     | 18.062                    | 2.04066                     | -3.14585             | -7.9888   | 5.00E-05 | 0.000541 | yes         |
| ycgB     | 28.7455                   | 3.39941                     | -3.07998             | -7.89347  | 5.00E-05 | 0.000541 | yes         |

| Table S2 | value_alsS<br>High sorted | value_alsS<br>Normal sorted | log2(fold<br>change) | test_stat | p_value  | q_value  | significant |
|----------|---------------------------|-----------------------------|----------------------|-----------|----------|----------|-------------|
| ywrD     | 9.56296                   | 1.13413                     | -3.07587             | -8.26406  | 5.00E-05 | 0.000541 | yes         |
| tlpC     | 199.454                   | 24.5145                     | -3.02435             | -11.4481  | 5.00E-05 | 0.000541 | yes         |
| yebC     | 96.1829                   | 11.8478                     | -3.02117             | -11.1503  | 5.00E-05 | 0.000541 | yes         |
| ydhB     | 33.3965                   | 4.11444                     | -3.02093             | -9.00676  | 5.00E-05 | 0.000541 | yes         |
| sacA     | 86.5302                   | 11.0679                     | -2.96682             | -11.3656  | 5.00E-05 | 0.000541 | yes         |
| ywrC     | 46.0462                   | 5.95295                     | -2.95141             | -8.03059  | 5.00E-05 | 0.000541 | yes         |
| yrzI     | 470.233                   | 63.2465                     | -2.89432             | -5.80507  | 5.00E-05 | 0.000541 | yes         |
| eglS     | 5.8145                    | 0.786349                    | -2.88641             | -6.75647  | 5.00E-05 | 0.000541 | yes         |
| ywdA     | 248.772                   | 33.6656                     | -2.88548             | -8.37947  | 5.00E-05 | 0.000541 | yes         |
| ywrB     | 14.2545                   | 1.9806                      | -2.84741             | -5.21339  | 5.00E-05 | 0.000541 | yes         |
| yxiP     | 34.7472                   | 4.83356                     | -2.84574             | -8.49546  | 5.00E-05 | 0.000541 | yes         |
| yndL     | 6.65548                   | 0.959599                    | -2.79404             | -5.03191  | 5.00E-05 | 0.000541 | yes         |
| ysdA     | 228.366                   | 33.9344                     | -2.75053             | -8.44134  | 5.00E-05 | 0.000541 | yes         |
| pbpI     | 8.29644                   | 1.24636                     | -2.73477             | -7.83102  | 5.00E-05 | 0.000541 | yes         |
| ywkB     | 141.801                   | 21.4185                     | -2.72694             | -10.7549  | 5.00E-05 | 0.000541 | yes         |
| ybzI     | 233.214                   | 35.4125                     | -2.71933             | -4.64391  | 5.00E-05 | 0.000541 | yes         |
| mrgA     | 47.0808                   | 7.20038                     | -2.70899             | -7.64736  | 5.00E-05 | 0.000541 | yes         |
| engD     | 402.028                   | 62.5456                     | -2.68432             | -10.267   | 5.00E-05 | 0.000541 | yes         |
| gmuD     | 1.74585                   | 0.27338                     | -2.67495             | -3.82506  | 5.00E-05 | 0.000541 | yes         |
| ndhF     | 3.32859                   | 0.536569                    | -2.63308             | -5.25253  | 5.00E-05 | 0.000541 | yes         |
| ykoY     | 25.214                    | 4.06658                     | -2.63234             | -8.4539   | 5.00E-05 | 0.000541 | yes         |
| sacB     | 2.48169                   | 0.413275                    | -2.58615             | -4.55541  | 5.00E-05 | 0.000541 | yes         |
| ggt      | 1.70152                   | 0.288457                    | -2.5604              | -4.23592  | 5.00E-05 | 0.000541 | yes         |
| tagC     | 3.71323                   | 0.638725                    | -2.53941             | -5.13081  | 5.00E-05 | 0.000541 | yes         |
| fosB     | 41.9288                   | 7.30991                     | -2.52002             | -6.92708  | 5.00E-05 | 0.000541 | yes         |
| cssR     | 21.0712                   | 3.71523                     | -2.50375             | -4.86383  | 5.00E-05 | 0.000541 | yes         |
| dprA     | 47.952                    | 8.51949                     | -2.49275             | -8.89287  | 5.00E-05 | 0.000541 | yes         |
| lrgA     | 20.6199                   | 3.76163                     | -2.45461             | -5.38931  | 5.00E-05 | 0.000541 | yes         |
| cssS     | 19.0629                   | 3.52253                     | -2.43608             | -7.22209  | 5.00E-05 | 0.000541 | yes         |
| sigW     | 1401.75                   | 259.516                     | -2.43334             | -9.48291  | 5.00E-05 | 0.000541 | yes         |
| yneB     | 15.413                    | 2.88204                     | -2.41899             | -6.02177  | 5.00E-05 | 0.000541 | yes         |
| bglC     | 72.0407                   | 13.4899                     | -2.41693             | -9.59066  | 5.00E-05 | 0.000541 | yes         |
| ythB     | 4.36599                   | 0.822022                    | -2.40906             | -4.77578  | 5.00E-05 | 0.000541 | yes         |
| yueE     | 33.6017                   | 6.44123                     | -2.38312             | -6.90624  | 5.00E-05 | 0.000541 | yes         |
| amtB     | 9.82562                   | 1.90279                     | -2.36843             | -6.64403  | 5.00E-05 | 0.000541 | yes         |
| rbsA     | 3.64654                   | 0.715831                    | -2.34884             | -5.14093  | 5.00E-05 | 0.000541 | yes         |
| glcR     | 55.2842                   | 10.8747                     | -2.3459              | -8.42823  | 5.00E-05 | 0.000541 | yes         |
| zosA     | 4.46673                   | 0.888271                    | -2.33015             | -6.12857  | 5.00E-05 | 0.000541 | yes         |
| pucL     | 2.41406                   | 0.483952                    | -2.31852             | -4.12093  | 5.00E-05 | 0.000541 | yes         |
| disA     | 42.1163                   | 8.77015                     | -2.26371             | -8.45558  | 5.00E-05 | 0.000541 | yes         |
| yuzF     | 48.2991                   | 10.0982                     | -2.25789             | -3.88647  | 5.00E-05 | 0.000541 | yes         |
| yqjB     | 14.0226                   | 2.94918                     | -2.24936             | -5.04338  | 5.00E-05 | 0.000541 | yes         |
| yuaF     | 206.367                   | 43.485                      | -2.24662             | -8.87919  | 5.00E-05 | 0.000541 | yes         |
| spoVD    | 2.68394                   | 0.575873                    | -2.22053             | -5.03766  | 5.00E-05 | 0.000541 | yes         |

| Table S2 | value_alsS<br>High sorted | value_alsS<br>Normal sorted | log2(fold<br>change) | test_stat | p_value  | q_value  | significant |
|----------|---------------------------|-----------------------------|----------------------|-----------|----------|----------|-------------|
| mntH     | 2.99982                   | 0.651158                    | -2.2038              | -4.3817   | 5.00E-05 | 0.000541 | yes         |
| yxjJ     | 182.522                   | 40.2977                     | -2.1793              | -6.75199  | 5.00E-05 | 0.000541 | yes         |
| isp      | 3.90864                   | 0.868184                    | -2.17059             | -4.19356  | 5.00E-05 | 0.000541 | yes         |
| lrgB     | 26.0725                   | 5.8524                      | -2.15543             | -6.73185  | 5.00E-05 | 0.000541 | yes         |
| rsiW     | 307.256                   | 69.3767                     | -2.14692             | -8.49651  | 5.00E-05 | 0.000541 | yes         |
| ysdB     | 104.175                   | 24.1221                     | -2.11059             | -7.20668  | 5.00E-05 | 0.000541 | yes         |
| radA     | 39.1582                   | 9.15343                     | -2.09693             | -8.15514  | 5.00E-05 | 0.000541 | yes         |
| yhel     | 14.3384                   | 3.35926                     | -2.09367             | -5.61434  | 5.00E-05 | 0.000541 | yes         |
| yebE     | 8.58095                   | 2.02833                     | -2.08084             | -3.958    | 5.00E-05 | 0.000541 | yes         |
| yuaG     | 59.4062                   | 14.1306                     | -2.07179             | -8.27756  | 5.00E-05 | 0.000541 | yes         |
| yflS     | 21.7362                   | 5.22915                     | -2.05546             | -7.41492  | 5.00E-05 | 0.000541 | yes         |
| nagZ     | 2.39027                   | 0.576689                    | -2.05131             | -4.59747  | 5.00E-05 | 0.000541 | yes         |
| copB     | 2.79642                   | 0.677122                    | -2.04609             | -4.99704  | 5.00E-05 | 0.000541 | yes         |
| hemQ     | 70.9845                   | 17.2104                     | -2.04423             | -7.86678  | 5.00E-05 | 0.000541 | yes         |
| yjzH     | 140.639                   | 34.5631                     | -2.02469             | -4.37483  | 5.00E-05 | 0.000541 | yes         |
| xpaC     | 34.055                    | 8.37475                     | -2.02375             | -6.53307  | 5.00E-05 | 0.000541 | yes         |
| yhcF     | 32.3707                   | 8.12969                     | -1.99342             | -4.8808   | 5.00E-05 | 0.000541 | yes         |
| divIC    | 188.067                   | 47.7078                     | -1.97895             | -7.45719  | 5.00E-05 | 0.000541 | yes         |
| araA     | 2.11595                   | 0.539274                    | -1.97222             | -3.85998  | 5.00E-05 | 0.000541 | yes         |
| spolIB   | 5.73155                   | 1.4635                      | -1.9695              | -4.6165   | 5.00E-05 | 0.000541 | yes         |
| yppC     | 10.7021                   | 2.75136                     | -1.95967             | -5.54997  | 5.00E-05 | 0.000541 | yes         |
| yeaA     | 29.6144                   | 7.61742                     | -1.95893             | -6.99214  | 5.00E-05 | 0.000541 | yes         |
| fur      | 137.832                   | 35.5956                     | -1.95314             | -7.39937  | 5.00E-05 | 0.000541 | yes         |
| yxIF     | 9.96352                   | 2.65373                     | -1.90864             | -4.00921  | 5.00E-05 | 0.000541 | yes         |
| yrkO     | 3.42108                   | 0.911319                    | -1.90842             | -4.06299  | 5.00E-05 | 0.000541 | yes         |
| mntA     | 148.993                   | 40.6538                     | -1.87378             | -7.48721  | 5.00E-05 | 0.000541 | yes         |
| ythP     | 67.6877                   | 18.7804                     | -1.84967             | -5.1024   | 5.00E-05 | 0.000541 | yes         |
| dppD     | 12.4415                   | 3.45687                     | -1.84763             | -5.66517  | 5.00E-05 | 0.000541 | yes         |
| ybbJ     | 16.4357                   | 4.61245                     | -1.83322             | -4.4212   | 5.00E-05 | 0.000541 | yes         |
| ktrA     | 9.82093                   | 2.78065                     | -1.82044             | -4.37438  | 5.00E-05 | 0.000541 | yes         |
| katA     | 24.0157                   | 6.88423                     | -1.80261             | -6.8098   | 5.00E-05 | 0.000541 | yes         |
| putR     | 9.44088                   | 2.72505                     | -1.79264             | -5.49196  | 5.00E-05 | 0.000541 | yes         |
| ltaSA    | 74.6406                   | 21.785                      | -1.77663             | -7.05993  | 5.00E-05 | 0.000541 | yes         |
| trpE     | 16.9862                   | 4.96022                     | -1.77589             | -4.66232  | 5.00E-05 | 0.000541 | yes         |
| mreBH    | 3.50307                   | 1.05003                     | -1.73819             | -3.58109  | 5.00E-05 | 0.000541 | yes         |
| recU     | 62.8135                   | 18.9496                     | -1.72891             | -6.45692  | 5.00E-05 | 0.000541 | yes         |
| yxID     | 154.485                   | 46.8268                     | -1.72206             | -3.43245  | 5.00E-05 | 0.000541 | yes         |
| dppC     | 7.88361                   | 2.4029                      | -1.71408             | -4.58794  | 5.00E-05 | 0.000541 | yes         |
| yknU     | 2.39301                   | 0.732761                    | -1.70741             | -3.9248   | 5.00E-05 | 0.000541 | yes         |
| ypuA     | 24.8336                   | 7.63144                     | -1.70227             | -5.85855  | 5.00E-05 | 0.000541 | yes         |
| yuaI     | 146.105                   | 45.1393                     | -1.69455             | -6.71873  | 5.00E-05 | 0.000541 | yes         |
| ycgA     | 3.27314                   | 1.01139                     | -1.69434             | -3.99329  | 5.00E-05 | 0.000541 | yes         |
| ybbK     | 50.8849                   | 15.7857                     | -1.68862             | -5.56468  | 5.00E-05 | 0.000541 | yes         |
| ylbP     | 21.8882                   | 6.8966                      | -1.6662              | -4.54089  | 5.00E-05 | 0.000541 | yes         |

| Table S2 | value_alsS<br>High sorted | value_alsS<br>Normal sorted | log2(fold<br>change) | test_stat | p_value  | q_value  | significant |
|----------|---------------------------|-----------------------------|----------------------|-----------|----------|----------|-------------|
| yxnB     | 203.128                   | 64.0712                     | -1.66464             | -6.65746  | 5.00E-05 | 0.000541 | yes         |
| mntB     | 135.389                   | 42.7939                     | -1.66163             | -6.67727  | 5.00E-05 | 0.000541 | yes         |
| yhbJ     | 7.07107                   | 2.2596                      | -1.64586             | -3.65853  | 5.00E-05 | 0.000541 | yes         |
| yjbC     | 39.56                     | 12.7799                     | -1.63016             | -5.56209  | 5.00E-05 | 0.000541 | yes         |
| murB     | 36.1473                   | 11.7595                     | -1.62006             | -6.08636  | 5.00E-05 | 0.000541 | yes         |
| yhdY     | 4.10283                   | 1.33478                     | -1.62001             | -3.77924  | 5.00E-05 | 0.000541 | yes         |
| rapD     | 12.3051                   | 4.00853                     | -1.61812             | -5.16308  | 5.00E-05 | 0.000541 | yes         |
| licT     | 24.3496                   | 7.94597                     | -1.6156              | -5.55091  | 5.00E-05 | 0.000541 | yes         |
| mnmE     | 45.5801                   | 14.9156                     | -1.61158             | -6.44768  | 5.00E-05 | 0.000541 | yes         |
| lplD     | 2.72312                   | 0.891309                    | -1.61126             | -3.53088  | 5.00E-05 | 0.000541 | yes         |
| trnY-Lys | 3629.59                   | 1201.71                     | -1.59472             | -3.53156  | 5.00E-05 | 0.000541 | yes         |
| yhbl     | 15.2277                   | 5.0642                      | -1.5883              | -3.79553  | 5.00E-05 | 0.000541 | yes         |
| rapA     | 260.051                   | 87.6547                     | -1.56889             | -5.79122  | 5.00E-05 | 0.000541 | yes         |
| yrrM     | 28.8912                   | 9.75567                     | -1.56631             | -5.2534   | 5.00E-05 | 0.000541 | yes         |
| yacl     | 63.0827                   | 21.3166                     | -1.56527             | -6.2772   | 5.00E-05 | 0.000541 | yes         |
| ycgQ     | 7.28227                   | 2.46313                     | -1.56389             | -3.96653  | 5.00E-05 | 0.000541 | yes         |
| yufL     | 7.60315                   | 2.58558                     | -1.55611             | -4.03461  | 5.00E-05 | 0.000541 | yes         |
| yjoB     | 21.3078                   | 7.25413                     | -1.55451             | -5.77194  | 5.00E-05 | 0.000541 | yes         |
| ybbC     | 3.10313                   | 1.05766                     | -1.55285             | -3.48907  | 5.00E-05 | 0.000541 | yes         |
| dppE     | 10.0367                   | 3.4239                      | -1.55157             | -5.30095  | 5.00E-05 | 0.000541 | yes         |
| ylbA     | 47.6631                   | 16.351                      | -1.54349             | -4.58119  | 5.00E-05 | 0.000541 | yes         |
| mntC     | 74.2554                   | 26.1888                     | -1.50355             | -4.91004  | 5.00E-05 | 0.000541 | yes         |
| ydjP     | 44.3663                   | 15.6999                     | -1.49871             | -5.73669  | 5.00E-05 | 0.000541 | yes         |
| perR     | 106.07                    | 37.5872                     | -1.4967              | -5.64759  | 5.00E-05 | 0.000541 | yes         |
| glnR     | 135.502                   | 48.0273                     | -1.49638             | -5.74004  | 5.00E-05 | 0.000541 | yes         |
| ywrE     | 34.0429                   | 12.1604                     | -1.48517             | -3.79726  | 5.00E-05 | 0.000541 | yes         |
| clpE     | 3.12595                   | 1.12107                     | -1.47943             | -4.08174  | 5.00E-05 | 0.000541 | yes         |
| kinD     | 29.7542                   | 10.69                       | -1.47683             | -5.85158  | 5.00E-05 | 0.000541 | yes         |
| hutP     | 33.245                    | 11.9617                     | -1.47471             | -4.4679   | 5.00E-05 | 0.000541 | yes         |
| yaaN     | 18.2131                   | 6.55541                     | -1.47422             | -5.2719   | 5.00E-05 | 0.000541 | yes         |
| aapA     | 8.63053                   | 3.10978                     | -1.47264             | -4.73541  | 5.00E-05 | 0.000541 | yes         |
| yxIE     | 27.0799                   | 9.99239                     | -1.43832             | -4.15741  | 5.00E-05 | 0.000541 | yes         |
| bcrC     | 14.1667                   | 5.26538                     | -1.42789             | -3.85741  | 5.00E-05 | 0.000541 | yes         |
| bgIH     | 7.68826                   | 2.86014                     | -1.42657             | -4.50427  | 5.00E-05 | 0.000541 | yes         |
| ymbB     | 192.805                   | 71.893                      | -1.42322             | -5.19131  | 5.00E-05 | 0.000541 | yes         |
| ybbF     | 3.32786                   | 1.24656                     | -1.41665             | -3.47074  | 5.00E-05 | 0.000541 | yes         |
| yheH     | 10.7574                   | 4.03808                     | -1.41359             | -3.99445  | 5.00E-05 | 0.000541 | yes         |
| yeel     | 91.6943                   | 34.5769                     | -1.40702             | -5.61866  | 5.00E-05 | 0.000541 | yes         |
| murG     | 23.5507                   | 8.92217                     | -1.4003              | -5.20721  | 5.00E-05 | 0.000541 | yes         |
| mecB     | 34.9288                   | 13.4015                     | -1.38202             | -4.73424  | 5.00E-05 | 0.000541 | yes         |
| mntD     | 56.9335                   | 21.9548                     | -1.37474             | -3.15262  | 5.00E-05 | 0.000541 | yes         |
| yoaF     | 115.88                    | 45.1526                     | -1.35975             | -4.51344  | 5.00E-05 | 0.000541 | yes         |
| yfhM     | 16.5778                   | 6.48399                     | -1.3543              | -3.31756  | 5.00E-05 | 0.000541 | yes         |
| murQ     | 12.2343                   | 4.84435                     | -1.33656             | -4.18359  | 5.00E-05 | 0.000541 | yes         |

| Table S2 | value_alsS<br>High sorted | value_alsS<br>Normal sorted | log2(fold<br>change) | test_stat | p_value  | q_value  | significant |
|----------|---------------------------|-----------------------------|----------------------|-----------|----------|----------|-------------|
| yqeZ     | 185.425                   | 73.7854                     | -1.32943             | -5.07719  | 5.00E-05 | 0.000541 | yes         |
| ywbF     | 15.3567                   | 6.11457                     | -1.32854             | -4.70147  | 5.00E-05 | 0.000541 | yes         |
| dctP     | 6.82373                   | 2.73601                     | -1.31849             | -3.96142  | 5.00E-05 | 0.000541 | yes         |
| ribE     | 25.0164                   | 10.0655                     | -1.31345             | -4.37408  | 5.00E-05 | 0.000541 | yes         |
| yrrN     | 33.1915                   | 13.3805                     | -1.31068             | -5.00931  | 5.00E-05 | 0.000541 | yes         |
| csbX     | 10.6906                   | 4.35486                     | -1.29564             | -4.37278  | 5.00E-05 | 0.000541 | yes         |
| ispD     | 32.8666                   | 13.4393                     | -1.29017             | -4.12595  | 5.00E-05 | 0.000541 | yes         |
| yhcA     | 4.62398                   | 1.90275                     | -1.28105             | -3.73406  | 5.00E-05 | 0.000541 | yes         |
| ydbO     | 6.13384                   | 2.52881                     | -1.27833             | -3.26214  | 5.00E-05 | 0.000541 | yes         |
| trpD     | 17.7596                   | 7.38354                     | -1.26621             | -2.91648  | 5.00E-05 | 0.000541 | yes         |
| yrrS     | 35.1756                   | 14.7848                     | -1.25046             | -4.58362  | 5.00E-05 | 0.000541 | yes         |
| yhdL     | 10.3614                   | 4.35708                     | -1.24979             | -3.43604  | 5.00E-05 | 0.000541 | yes         |
| yngC     | 37.0839                   | 15.5962                     | -1.2496              | -4.43267  | 5.00E-05 | 0.000541 | yes         |
| yxjI     | 39.8724                   | 16.7808                     | -1.24858             | -4.21422  | 5.00E-05 | 0.000541 | yes         |
| yfhL     | 96.7085                   | 40.9709                     | -1.23904             | -3.4269   | 5.00E-05 | 0.000541 | yes         |
| yfkA     | 7.90624                   | 3.4032                      | -1.2161              | -3.69358  | 5.00E-05 | 0.000541 | yes         |
| mhqR     | 40.8606                   | 17.6081                     | -1.21447             | -3.93353  | 5.00E-05 | 0.000541 | yes         |
| ilvE     | 36.21                     | 15.8427                     | -1.19257             | -4.70353  | 5.00E-05 | 0.000541 | yes         |
| bglP     | 5.38924                   | 2.36264                     | -1.18968             | -3.79555  | 5.00E-05 | 0.000541 | yes         |
| amhX     | 9.04404                   | 3.99566                     | -1.17854             | -3.74863  | 5.00E-05 | 0.000541 | yes         |
| yaaO     | 8.70359                   | 3.86115                     | -1.17258             | -3.4582   | 5.00E-05 | 0.000541 | yes         |
| ponA     | 32.3032                   | 14.4215                     | -1.16345             | -4.69605  | 5.00E-05 | 0.000541 | yes         |
| yqfB     | 158.966                   | 71.7457                     | -1.14776             | -4.55497  | 5.00E-05 | 0.000541 | yes         |
| yxzE     | 325.143                   | 147.279                     | -1.14252             | -3.74737  | 5.00E-05 | 0.000541 | yes         |
| trnI-Ala | 47959.7                   | 22160.5                     | -1.11383             | -4.46164  | 5.00E-05 | 0.000541 | yes         |
| amyE     | 26.3262                   | 12.2806                     | -1.10012             | -4.41448  | 5.00E-05 | 0.000541 | yes         |
| yhcG     | 16.1444                   | 7.5395                      | -1.09849             | -3.46255  | 5.00E-05 | 0.000541 | yes         |
| dppB     | 10.0754                   | 4.71489                     | -1.09555             | -3.36726  | 5.00E-05 | 0.000541 | yes         |
| yhaZ     | 5.31825                   | 2.49087                     | -1.0943              | -2.96991  | 5.00E-05 | 0.000541 | yes         |
| ywqC     | 20.2386                   | 9.48447                     | -1.09347             | -3.00756  | 5.00E-05 | 0.000541 | yes         |
| menA     | 42.469                    | 19.9649                     | -1.08894             | -4.29817  | 5.00E-05 | 0.000541 | yes         |
| yceC     | 151.077                   | 71.2819                     | -1.08367             | -4.3709   | 5.00E-05 | 0.000541 | yes         |
| yqfA     | 143.737                   | 68.2127                     | -1.07532             | -4.30503  | 5.00E-05 | 0.000541 | yes         |
| yvqJ     | 23.8343                   | 11.3135                     | -1.07499             | -4.19815  | 5.00E-05 | 0.000541 | yes         |
| glpD     | 4.04729                   | 1.92289                     | -1.07368             | -3.12847  | 5.00E-05 | 0.000541 | yes         |
| yobJ     | 32.3087                   | 15.4584                     | -1.06354             | -4.05405  | 5.00E-05 | 0.000541 | yes         |
| yfnA     | 6.88887                   | 3.29751                     | -1.06289             | -3.38282  | 5.00E-05 | 0.000541 | yes         |
| tRNA-Ala | 46217.3                   | 22288.5                     | -1.05213             | -4.21526  | 5.00E-05 | 0.000541 | yes         |
| hrcA     | 42.975                    | 20.7504                     | -1.05036             | -4.17308  | 5.00E-05 | 0.000541 | yes         |
| yerH     | 28.9299                   | 13.9784                     | -1.04936             | -4.13671  | 5.00E-05 | 0.000541 | yes         |
| yfmC     | 89.6538                   | 43.4894                     | -1.0437              | -4.20965  | 5.00E-05 | 0.000541 | yes         |
| ybbH     | 9.69893                   | 4.7369                      | -1.03388             | -3.08866  | 5.00E-05 | 0.000541 | yes         |
| trnJ-Ala | 46920.9                   | 23029.5                     | -1.02675             | -4.12076  | 5.00E-05 | 0.000541 | yes         |
| pyrR     | 89.2958                   | 44.0415                     | -1.01973             | -4.03855  | 5.00E-05 | 0.000541 | yes         |

| Table S2 | value_alsS<br>High sorted | value_alsS<br>Normal sorted | log2(fold<br>change) | test_stat | p_value  | q_value  | significant |
|----------|---------------------------|-----------------------------|----------------------|-----------|----------|----------|-------------|
| rodA     | 14.8131                   | 7.32889                     | -1.01521             | -3.69227  | 5.00E-05 | 0.000541 | yes         |
| trnO-Ala | 46625.2                   | 23160.8                     | -1.00943             | -4.05031  | 5.00E-05 | 0.000541 | yes         |
| ybaR     | 11.4475                   | 5.68745                     | -1.00918             | -3.64423  | 5.00E-05 | 0.000541 | yes         |
| yqzC     | 44.1272                   | 21.982                      | -1.00534             | -2.91915  | 5.00E-05 | 0.000541 | yes         |
| rpmGB    | 1265.48                   | 631.207                     | -1.0035              | -3.60655  | 5.00E-05 | 0.000541 | yes         |
| ydzA     | 135.863                   | 69.1709                     | -0.97392             | -3.45754  | 5.00E-05 | 0.000541 | yes         |
| iseA     | 260.245                   | 132.795                     | -0.97067             | -3.922    | 5.00E-05 | 0.000541 | yes         |
| ribD     | 18.8139                   | 9.62916                     | -0.96632             | -3.59364  | 5.00E-05 | 0.000541 | yes         |
| pbpE     | 48.4996                   | 24.909                      | -0.96131             | -3.88066  | 5.00E-05 | 0.000541 | yes         |
| ydjO     | 296.589                   | 152.645                     | -0.95828             | -3.26118  | 5.00E-05 | 0.000541 | yes         |
| pps      | 2.80671                   | 1.4762                      | -0.92699             | -2.83451  | 5.00E-05 | 0.000541 | yes         |
| yvIB     | 52.5977                   | 27.8632                     | -0.91664             | -3.6931   | 5.00E-05 | 0.000541 | yes         |
| ribAB    | 25.437                    | 13.5214                     | -0.91168             | -3.58398  | 5.00E-05 | 0.000541 | yes         |
| racX     | 49.0113                   | 26.3644                     | -0.89452             | -3.49959  | 5.00E-05 | 0.000541 | yes         |
| yhxD     | 21.4044                   | 11.5465                     | -0.89046             | -3.28825  | 5.00E-05 | 0.000541 | yes         |
| ligA     | 16.6859                   | 9.08021                     | -0.87783             | -3.48152  | 5.00E-05 | 0.000541 | yes         |
| pepF     | 31.5223                   | 17.2443                     | -0.87025             | -3.51269  | 5.00E-05 | 0.000541 | yes         |
| yrro     | 24.9514                   | 13.7059                     | -0.86433             | -3.41184  | 5.00E-05 | 0.000541 | yes         |
| trnB-Ala | 54138.4                   | 29747.9                     | -0.86387             | -3.46586  | 5.00E-05 | 0.000541 | yes         |
| nupN     | 20.7808                   | 11.4665                     | -0.85782             | -3.27288  | 5.00E-05 | 0.000541 | yes         |
| ydbl     | 20.5917                   | 11.5057                     | -0.83971             | -3.18573  | 5.00E-05 | 0.000541 | yes         |
| efeN     | 20.1379                   | 11.2522                     | -0.8397              | -3.2592   | 5.00E-05 | 0.000541 | yes         |
| mecA     | 34.2284                   | 19.3044                     | -0.82627             | -3.08401  | 5.00E-05 | 0.000541 | yes         |
| yusP     | 16.2329                   | 9.19268                     | -0.82036             | -2.90197  | 5.00E-05 | 0.000541 | yes         |
| ymfC     | 41.8676                   | 23.891                      | -0.80937             | -3.15956  | 5.00E-05 | 0.000541 | yes         |
| pyrP     | 27.5405                   | 15.8456                     | -0.79747             | -3.17117  | 5.00E-05 | 0.000541 | yes         |
| trmFO    | 11.6541                   | 6.72722                     | -0.79276             | -2.87297  | 5.00E-05 | 0.000541 | yes         |
| spoOM    | 167.835                   | 97.7736                     | -0.77953             | -3.13952  | 5.00E-05 | 0.000541 | yes         |
| yncM     | 26.3276                   | 15.4159                     | -0.77216             | -2.86903  | 5.00E-05 | 0.000541 | yes         |
| yceD     | 213.621                   | 125.315                     | -0.7695              | -3.11457  | 5.00E-05 | 0.000541 | yes         |
| trmF     | 21.0263                   | 12.3421                     | -0.76861             | -3.07733  | 5.00E-05 | 0.000541 | yes         |
| atpI     | 210.206                   | 124.957                     | -0.75037             | -3.01436  | 5.00E-05 | 0.000541 | yes         |
| dinG     | 15.5306                   | 9.34715                     | -0.73251             | -2.94948  | 5.00E-05 | 0.000541 | yes         |
| dnaA     | 37.0391                   | 22.2954                     | -0.7323              | -2.94882  | 5.00E-05 | 0.000541 | yes         |
| ydhK     | 9.92722                   | 3.25373                     | -1.6093              | -3.89881  | 0.0001   | 0.00102  | yes         |
| amiE     | 2.80204                   | 0.850705                    | -1.71975             | -3.72162  | 0.0001   | 0.00102  | yes         |
| cwlH     | 7.78614                   | 0.413947                    | -4.23339             | -5.56755  | 0.0001   | 0.00102  | yes         |
| holA     | 9.96161                   | 4.99451                     | -0.99604             | -3.20175  | 0.0001   | 0.00102  | yes         |
| mtlD     | 2.52983                   | 0.754091                    | -1.74623             | -3.35937  | 0.0001   | 0.00102  | yes         |
| pcrA     | 10.0704                   | 6.09652                     | -0.72406             | -2.82151  | 0.0001   | 0.00102  | yes         |
| sda      | 207.51                    | 72.4657                     | -1.51781             | -3.254    | 0.0001   | 0.00102  | yes         |
| ydfL     | 4.69982                   | 1.64376                     | -1.5156              | -3.27687  | 0.0001   | 0.00102  | yes         |
| yhjB     | 7.4548                    | 3.94251                     | -0.91905             | -2.63004  | 0.0001   | 0.00102  | yes         |
| yjzB     | 51.498                    | 6.4129                      | -3.00547             | -4.52797  | 0.0001   | 0.00102  | yes         |



| Table S2 | value_alsS<br>High sorted | value_alsS<br>Normal sorted | log2(fold<br>change) | test_stat | p_value | q_value  | significant |
|----------|---------------------------|-----------------------------|----------------------|-----------|---------|----------|-------------|
| yneA     | 30.5084                   | 2.41965                     | -3.65634             | -5.03906  | 0.0001  | 0.00102  | yes         |
| yvaV     | 11.7065                   | 5.10424                     | -1.19754             | -3.0159   | 0.00015 | 0.001474 | yes         |
| aprX     | 2.47035                   | 0.243793                    | -3.34099             | -4.70003  | 0.00015 | 0.001474 | yes         |
| frlD     | 3.29141                   | 0.946857                    | -1.79749             | -3.31189  | 0.00015 | 0.001474 | yes         |
| hemA     | 22.2393                   | 13.7578                     | -0.69286             | -2.74506  | 0.00015 | 0.001474 | yes         |
| trnS-Lys | 2963.38                   | 910.455                     | -1.70259             | -3.39077  | 0.00015 | 0.001474 | yes         |
| ycgR     | 3.45893                   | 0.818698                    | -2.07892             | -3.66899  | 0.00015 | 0.001474 | yes         |
| ydzV     | 16.3468                   | 4.94439                     | -1.72514             | -3.31081  | 0.00015 | 0.001474 | yes         |
| yhjA     | 198.227                   | 119.657                     | -0.72825             | -2.72684  | 0.00015 | 0.001474 | yes         |
| yusO     | 30.5204                   | 7.89562                     | -1.95065             | -3.21753  | 0.00015 | 0.001474 | yes         |
| yxIH     | 5.61924                   | 1.9255                      | -1.54514             | -3.02605  | 0.00015 | 0.001474 | yes         |
| licH     | 2.16929                   | 0.671651                    | -1.69144             | -3.23273  | 0.0002  | 0.001891 | yes         |
| lysC     | 19.2217                   | 12.0947                     | -0.66836             | -2.59794  | 0.0002  | 0.001891 | yes         |
| mta      | 4.94433                   | 1.72475                     | -1.51939             | -3.28123  | 0.0002  | 0.001891 | yes         |
| nasB     | 1.05347                   | 0.18129                     | -2.53878             | -3.95835  | 0.0002  | 0.001891 | yes         |
| phoB     | 1.75541                   | 0.30208                     | -2.5388              | -3.72806  | 0.0002  | 0.001891 | yes         |
| sigY     | 10.4975                   | 1.93636                     | -2.43862             | -3.36988  | 0.0002  | 0.001891 | yes         |
| ycgS     | 3.34471                   | 0.976268                    | -1.77653             | -3.27754  | 0.0002  | 0.001891 | yes         |
| yddT     | 5.68812                   | 1.81601                     | -1.64718             | -3.42677  | 0.0002  | 0.001891 | yes         |
| yheD     | 3.12384                   | 0.299628                    | -3.38208             | -4.47374  | 0.0002  | 0.001891 | yes         |
| yizB     | 19.6387                   | 4.25234                     | -2.20737             | -3.53629  | 0.0002  | 0.001891 | yes         |
| ythQ     | 28.6729                   | 14.2755                     | -1.00614             | -2.86272  | 0.0002  | 0.001891 | yes         |
| yxIB     | 14.8086                   | 4.44937                     | -1.73476             | -3.40641  | 0.0002  | 0.001891 | yes         |
| clpC     | 28.695                    | 16.5832                     | -0.79108             | -2.68146  | 0.00025 | 0.002266 | yes         |
| mtlA     | 2.30007                   | 0.869878                    | -1.40279             | -3.09717  | 0.00025 | 0.002266 | yes         |
| rbsB     | 3.09285                   | 1.0151                      | -1.60731             | -3.12159  | 0.00025 | 0.002266 | yes         |
| sbcC     | 8.44697                   | 5.16702                     | -0.7091              | -2.54971  | 0.00025 | 0.002266 | yes         |
| spxA     | 77.4896                   | 48.9896                     | -0.66153             | -2.49536  | 0.00025 | 0.002266 | yes         |
| trnS-Ser | 2980.65                   | 1517.48                     | -0.97395             | -2.7488   | 0.00025 | 0.002266 | yes         |
| yusD     | 16.2532                   | 5.6663                      | -1.52025             | -3.04243  | 0.00025 | 0.002266 | yes         |
| yvgT     | 7.99769                   | 3.46411                     | -1.2071              | -2.85403  | 0.00025 | 0.002266 | yes         |
| ycsN     | 20.5866                   | 12.5614                     | -0.71271             | -2.65783  | 0.0003  | 0.002648 | yes         |
| mtlF     | 10.6948                   | 4.05816                     | -1.39801             | -2.94976  | 0.0003  | 0.002648 | yes         |
| pcrB     | 17.3784                   | 9.98107                     | -0.80003             | -2.61823  | 0.0003  | 0.002648 | yes         |
| yhaJ     | 6.41195                   | 1.85131                     | -1.79222             | -3.24239  | 0.0003  | 0.002648 | yes         |
| ypzK     | 51.4724                   | 29.2334                     | -0.81618             | -2.71893  | 0.0003  | 0.002648 | yes         |
| yqzG     | 17.2284                   | 3.97318                     | -2.11642             | -3.63475  | 0.0003  | 0.002648 | yes         |
| yvaF     | 8.62188                   | 2.02993                     | -2.08657             | -3.41096  | 0.0003  | 0.002648 | yes         |
| eag      | 15.673                    | 7.37527                     | -1.08752             | -2.73934  | 0.00035 | 0.002997 | yes         |
| oxaAA    | 64.1321                   | 30.2865                     | -1.08237             | -2.66189  | 0.00035 | 0.002997 | yes         |
| rbsC     | 2.85878                   | 0.594689                    | -2.26519             | -3.73721  | 0.00035 | 0.002997 | yes         |
| sigM     | 19.4821                   | 5.46472                     | -1.83393             | -3.29909  | 0.00035 | 0.002997 | yes         |
| ybfl     | 4.46207                   | 1.15885                     | -1.94502             | -3.17362  | 0.00035 | 0.002997 | yes         |
| yndH     | 14.394                    | 4.28115                     | -1.7494              | -2.67979  | 0.00035 | 0.002997 | yes         |

| Table S2 | value_alsS<br>High sorted | value_alsS<br>Normal sorted | log2(fold<br>change) | test_stat | p_value | q_value  | significant |
|----------|---------------------------|-----------------------------|----------------------|-----------|---------|----------|-------------|
| mreC     | 43.5139                   | 25.628                      | -0.76376             | -2.47485  | 0.0004  | 0.003356 | yes         |
| pucR     | 1.82236                   | 0.655347                    | -1.47547             | -3.07992  | 0.0004  | 0.003356 | yes         |
| yabR     | 165.761                   | 104.064                     | -0.67164             | -2.67327  | 0.0004  | 0.003356 | yes         |
| exoA     | 7.56162                   | 3.75201                     | -1.01103             | -2.6896   | 0.00045 | 0.003734 | yes         |
| ywfO     | 23.4751                   | 14.9617                     | -0.64986             | -2.5723   | 0.00045 | 0.003734 | yes         |
| ywoH     | 9.36421                   | 3.11237                     | -1.58915             | -2.97214  | 0.00045 | 0.003734 | yes         |
| mgtE     | 11.7461                   | 7.42953                     | -0.66084             | -2.44991  | 0.0005  | 0.004103 | yes         |
| ydiM     | 11.5181                   | 4.02803                     | -1.51575             | -2.90719  | 0.0005  | 0.004103 | yes         |
| pucK     | 1.62285                   | 0.318581                    | -2.3488              | -3.49231  | 0.00055 | 0.004455 | yes         |
| yhjD     | 17.4246                   | 1.32006                     | -3.72245             | -4.55589  | 0.00055 | 0.004455 | yes         |
| yitR     | 40.2661                   | 19.1882                     | -1.06935             | -2.7657   | 0.00055 | 0.004455 | yes         |
| yvIA     | 192.393                   | 123.528                     | -0.63922             | -2.52826  | 0.00055 | 0.004455 | yes         |
| yxiC     | 27.2201                   | 10.1841                     | -1.41835             | -2.74815  | 0.00055 | 0.004455 | yes         |
| yubF     | 170.687                   | 106.469                     | -0.68091             | -2.47245  | 0.0006  | 0.004797 | yes         |
| bacB     | 21.2145                   | 11.5355                     | -0.87897             | -2.40502  | 0.00065 | 0.005099 | yes         |
| gmuF     | 3.14923                   | 0.919028                    | -1.77682             | -2.91065  | 0.00065 | 0.005099 | yes         |
| yfkC     | 8.26723                   | 4.67921                     | -0.82114             | -2.38713  | 0.00065 | 0.005099 | yes         |
| yttB     | 3.29777                   | 1.50679                     | -1.13001             | -2.75323  | 0.00065 | 0.005099 | yes         |
| yuxJ     | 2.34211                   | 0.853518                    | -1.45632             | -2.95978  | 0.00065 | 0.005099 | yes         |
| gmuG     | 2.08445                   | 0.690812                    | -1.5933              | -2.8747   | 0.0007  | 0.005434 | yes         |
| ydeB     | 8.30456                   | 3.12964                     | -1.4079              | -2.79099  | 0.0007  | 0.005434 | yes         |
| ytml     | 5.83345                   | 0.820482                    | -2.82981             | -3.89952  | 0.0007  | 0.005434 | yes         |
| yugG     | 30.5848                   | 18.0878                     | -0.7578              | -2.55096  | 0.0007  | 0.005434 | yes         |
| ywrA     | 12.0045                   | 1.21833                     | -3.3006              | -4.45063  | 0.0007  | 0.005434 | yes         |
| yvrN     | 108.189                   | 56.7442                     | -0.931               | -2.43152  | 0.00075 | 0.005762 | yes         |
| gntP     | 10.2997                   | 6.48975                     | -0.66637             | -2.40566  | 0.00075 | 0.005762 | yes         |
| phrH     | 1344.74                   | 163.039                     | -3.04404             | -2.65596  | 0.00075 | 0.005762 | yes         |
| gbsA     | 2.31706                   | 1.02466                     | -1.17716             | -2.74074  | 0.0008  | 0.006096 | yes         |
| glpK     | 7.44469                   | 4.62216                     | -0.68764             | -2.35898  | 0.0008  | 0.006096 | yes         |
| udk      | 19.8328                   | 11.6199                     | -0.77129             | -2.54209  | 0.0008  | 0.006096 | yes         |
| efeU     | 13.5922                   | 6.99695                     | -0.95798             | -2.37968  | 0.00085 | 0.006412 | yes         |
| ykzT     | 145.083                   | 50.2407                     | -1.52994             | -2.91477  | 0.00085 | 0.006412 | yes         |
| yxbA     | 261.008                   | 94.4953                     | -1.46578             | -2.32872  | 0.00085 | 0.006412 | yes         |
| yuzO     | 133.674                   | 46.0947                     | -1.53605             | -2.93343  | 0.00095 | 0.00708  | yes         |
| yetF     | 4.08703                   | 1.4186                      | -1.52659             | -2.91006  | 0.00095 | 0.00708  | yes         |
| ytol     | 6.42789                   | 3.79692                     | -0.75952             | -2.39981  | 0.00095 | 0.00708  | yes         |
| ydeL     | 1.77658                   | 0.670716                    | -1.40533             | -2.78654  | 0.001   | 0.007379 | yes         |
| yxel     | 2.11153                   | 0.526766                    | -2.00305             | -3.10855  | 0.001   | 0.007379 | yes         |
| tmk      | 12.507                    | 5.71361                     | -1.13026             | -2.36129  | 0.0011  | 0.00807  | yes         |
| nagBB    | 16.5865                   | 10.1923                     | -0.70253             | -2.37032  | 0.00115 | 0.008371 | yes         |
| glpF     | 5.74062                   | 3.03905                     | -0.91759             | -2.35474  | 0.0012  | 0.008667 | yes         |
| ktrB     | 3.46557                   | 1.84905                     | -0.90631             | -2.39868  | 0.0012  | 0.008667 | yes         |
| ylaN     | 283.902                   | 188.186                     | -0.59324             | -2.34699  | 0.0012  | 0.008667 | yes         |
| sigH     | 85.26                     | 56.547                      | -0.59242             | -2.38655  | 0.00125 | 0.008924 | yes         |



| Table S2  | value_alsS<br>High sorted | value_alsS<br>Normal sorted | log2(fold<br>change) | test_stat | p_value | q_value  | significant |
|-----------|---------------------------|-----------------------------|----------------------|-----------|---------|----------|-------------|
| ypuD      | 11.8041                   | 3.78379                     | -1.64139             | -2.82188  | 0.00125 | 0.008924 | yes         |
| yufM      | 14.9284                   | 7.45141                     | -1.00247             | -2.36265  | 0.00125 | 0.008924 | yes         |
| yugI      | 130.195                   | 87.638                      | -0.57104             | -2.26056  | 0.00125 | 0.008924 | yes         |
| ybfO      | 18.7563                   | 12.6186                     | -0.57183             | -2.24963  | 0.0013  | 0.009246 | yes         |
| yugT      | 1.0912                    | 0.351185                    | -1.63562             | -2.77744  | 0.00135 | 0.009493 | yes         |
| yvaE      | 20.2492                   | 7.25207                     | -1.4814              | -2.68437  | 0.0014  | 0.009735 | yes         |
| sucD      | 175.891                   | 116.136                     | -0.59887             | -2.31402  | 0.0014  | 0.009735 | yes         |
| guaD      | 10.0977                   | 4.72647                     | -1.09519             | -2.52667  | 0.0014  | 0.009735 | yes         |
| sigI      | 8.11309                   | 3.6806                      | -1.14031             | -2.50081  | 0.0014  | 0.009735 | yes         |
| gerR      | 3.90526                   | 1.05239                     | -1.89174             | -2.93496  | 0.00145 | 0.009898 | yes         |
| pstA      | 3.32515                   | 0.410375                    | -3.01841             | -3.08088  | 0.00145 | 0.009898 | yes         |
| yaaC      | 2.3386                    | 0.298342                    | -2.9706              | -3.71073  | 0.00145 | 0.009898 | yes         |
| yrhH      | 4.6713                    | 0.713315                    | -2.71121             | -3.36162  | 0.00145 | 0.009898 | yes         |
| bceB      | 1.71092                   | 0.808108                    | -1.08216             | -2.38328  | 0.0015  | 0.010202 | yes         |
| glnK      | 13.1772                   | 5.37238                     | -1.29441             | -2.56285  | 0.0015  | 0.010202 | yes         |
| rpsF      | 1776.19                   | 1187.05                     | -0.5814              | -2.24961  | 0.00155 | 0.010485 | yes         |
| nasC      | 0.754606                  | 0.160767                    | -2.23076             | -3.14594  | 0.0016  | 0.010688 | yes         |
| trnJ-Leu1 | 2786.28                   | 1441.59                     | -0.95068             | -2.3984   | 0.0016  | 0.010688 | yes         |
| xhIA      | 45.7334                   | 23.8951                     | -0.93653             | -2.37953  | 0.0016  | 0.010688 | yes         |
| gmuC      | 1.38958                   | 0.374255                    | -1.89256             | -2.96508  | 0.00165 | 0.010943 | yes         |
| yxxF      | 8.5412                    | 5.13431                     | -0.73427             | -2.25804  | 0.00165 | 0.010943 | yes         |
| ansZ      | 1.94496                   | 0.246278                    | -2.98138             | -3.80065  | 0.0017  | 0.011176 | yes         |
| araE      | 1.40019                   | 0.183103                    | -2.9349              | -3.60091  | 0.0017  | 0.011176 | yes         |
| ygaE      | 4.92204                   | 2.75092                     | -0.83934             | -2.29632  | 0.0017  | 0.011176 | yes         |
| ybfA      | 5.22562                   | 2.45421                     | -1.09034             | -2.25969  | 0.0018  | 0.011175 | yes         |
| pabB      | 13.8081                   | 9.16498                     | -0.59131             | -2.26796  | 0.00185 | 0.011993 | yes         |
| ynfC      | 15.5804                   | 8.38535                     | -0.89379             | -2.24885  | 0.00185 | 0.011993 | yes         |
| yrcC      | 3.62822                   | 1.55607                     | -1.22135             | -2.52835  | 0.00185 | 0.011993 | yes         |
| yvmA      | 4.76375                   | 2.75575                     | -0.78965             | -2.24711  | 0.00185 | 0.011993 | yes         |
| ndoAI     | 230.044                   | 156.522                     | -0.55554             | -2.16809  | 0.0019  | 0.012296 | yes         |
| gltC      | 6.64085                   | 3.82383                     | -0.79635             | -2.24324  | 0.00205 | 0.01313  | yes         |
| ytbE      | 2.30098                   | 0.7781                      | -1.56422             | -2.57758  | 0.0021  | 0.013336 | yes         |
| nasA      | 2.33544                   | 1.09058                     | -1.0986              | -2.40444  | 0.00215 | 0.013515 | yes         |
| ywgB      | 9.11043                   | 3.65841                     | -1.3163              | -2.30045  | 0.00215 | 0.013515 | yes         |
| yIbB      | 8.74235                   | 3.83201                     | -1.18992             | -2.4858   | 0.0022  | 0.013783 | yes         |
| rsmG      | 22.9572                   | 15.0665                     | -0.6076              | -2.20788  | 0.00225 | 0.014026 | yes         |
| csrA      | 43.3506                   | 11.2152                     | -1.9506              | -2.64969  | 0.0023  | 0.014219 | yes         |
| treP      | 1.1495                    | 0.200781                    | -2.51731             | -3.08942  | 0.0023  | 0.014219 | yes         |
| frlO      | 1.85505                   | 0.830445                    | -1.1595              | -2.33939  | 0.00235 | 0.01448  | yes         |
| licC      | 1.18058                   | 0.260034                    | -2.18273             | -2.98994  | 0.0024  | 0.01474  | yes         |
| yxcE      | 8.71271                   | 4.92426                     | -0.82322             | -2.2001   | 0.0024  | 0.01474  | yes         |
| mifM      | 45.3607                   | 25.422                      | -0.83537             | -2.25803  | 0.0025  | 0.015278 | yes         |
| trnS-Gln  | 5883.85                   | 3454.96                     | -0.76809             | -2.17589  | 0.00255 | 0.015533 | yes         |
| yxlG      | 6.56055                   | 2.62616                     | -1.32086             | -2.28224  | 0.0026  | 0.015786 | yes         |

| Table S2 | value_alsS<br>High sorted | value_alsS<br>Normal sorted | log2(fold<br>change) | test_stat | p_value | q_value  | significant |
|----------|---------------------------|-----------------------------|----------------------|-----------|---------|----------|-------------|
| ycnC     | 9.97391                   | 6.15139                     | -0.69725             | -2.18509  | 0.0028  | 0.016675 | yes         |
| minD     | 35.5552                   | 24.2594                     | -0.55152             | -2.1689   | 0.00285 | 0.016785 | yes         |
| veg      | 790.033                   | 551.962                     | -0.51735             | -2.0938   | 0.00285 | 0.016785 | yes         |
| yceE     | 101.157                   | 69.6008                     | -0.53941             | -2.17052  | 0.00285 | 0.016785 | yes         |
| yhcB     | 8.1093                    | 4.0687                      | -0.99501             | -2.30418  | 0.00285 | 0.016785 | yes         |
| yhxA     | 9.18782                   | 6.04298                     | -0.60446             | -2.14484  | 0.00285 | 0.016785 | yes         |
| ywsB     | 18.1755                   | 11.1218                     | -0.70861             | -2.16741  | 0.00285 | 0.016785 | yes         |
| yvrO     | 127.267                   | 58.6264                     | -1.11824             | -2.11281  | 0.00295 | 0.017211 | yes         |
| helD     | 3.75759                   | 2.39281                     | -0.65111             | -2.14651  | 0.00305 | 0.01763  | yes         |
| ywaD     | 1.08564                   | 0.298085                    | -1.86475             | -2.6911   | 0.00305 | 0.01763  | yes         |
| ydzE     | 25.4601                   | 6.45522                     | -1.9797              | -2.75968  | 0.0031  | 0.017808 | yes         |
| ywoG     | 4.22711                   | 2.43087                     | -0.7982              | -2.1781   | 0.0032  | 0.018187 | yes         |
| dnaH     | 41.7608                   | 26.1366                     | -0.67608             | -2.10249  | 0.0033  | 0.01867  | yes         |
| gmuE     | 2.73631                   | 1.01764                     | -1.427               | -2.25852  | 0.0034  | 0.01912  | yes         |
| yfmB     | 10.9558                   | 4.77342                     | -1.1986              | -2.33983  | 0.0034  | 0.01912  | yes         |
| bsuMB    | 20.0032                   | 13.795                      | -0.53609             | -2.09658  | 0.00345 | 0.019343 | yes         |
| xylA     | 1.21388                   | 0.406331                    | -1.57891             | -2.51188  | 0.00345 | 0.019343 | yes         |
| trnJ-Lys | 2610.18                   | 1294.44                     | -1.01182             | -2.1563   | 0.0035  | 0.019535 | yes         |
| yrkC     | 6.57057                   | 3.30739                     | -0.99032             | -2.20954  | 0.0035  | 0.019535 | yes         |
| ywlF     | 58.6991                   | 40.0793                     | -0.55048             | -2.07995  | 0.0035  | 0.019535 | yes         |
| yxIC     | 19.6163                   | 4.79495                     | -2.03247             | -2.60431  | 0.00355 | 0.019667 | yes         |
| yrhF     | 11.9703                   | 5.55404                     | -1.10784             | -2.26981  | 0.0036  | 0.019856 | yes         |
| yqiG     | 4.50216                   | 2.64436                     | -0.7677              | -2.10025  | 0.00365 | 0.020072 | yes         |
| yuaD     | 11.4627                   | 6.82747                     | -0.74752             | -2.08075  | 0.00365 | 0.020072 | yes         |
| efeM     | 24.459                    | 15.5432                     | -0.65408             | -2.04475  | 0.0037  | 0.020288 | yes         |
| pucJ     | 1.12921                   | 0.157958                    | -2.8377              | -3.21901  | 0.0037  | 0.020288 | yes         |
| tatCD    | 5.06122                   | 1.87473                     | -1.4328              | -2.30636  | 0.00375 | 0.020442 | yes         |
| yrdB     | 12.4529                   | 5.97424                     | -1.05966             | -2.23556  | 0.00385 | 0.020926 | yes         |
| msmE     | 1.41512                   | 0.490185                    | -1.52952             | -2.31638  | 0.0039  | 0.021136 | yes         |
| yusF     | 23.6796                   | 12.8259                     | -0.88459             | -2.17266  | 0.0039  | 0.021136 | yes         |
| ynzD     | 72.6899                   | 25.2559                     | -1.52513             | -2.41649  | 0.00395 | 0.021283 | yes         |
| yyzM     | 68.0257                   | 33.253                      | -1.03259             | -2.22983  | 0.00395 | 0.021283 | yes         |
| yqbA     | 1.31055                   | 0.136237                    | -3.26598             | -3.37481  | 0.004   | 0.021429 | yes         |
| mmr      | 2.39454                   | 1.19614                     | -1.00136             | -2.0326   | 0.0043  | 0.022775 | yes         |
| gbsB     | 3.07152                   | 1.69163                     | -0.86054             | -2.12989  | 0.00435 | 0.022942 | yes         |
| trnD-Gln | 6775.78                   | 4066.06                     | -0.73676             | -2.08955  | 0.00445 | 0.023403 | yes         |
| xkdK     | 7.86572                   | 5.18347                     | -0.60166             | -2.00096  | 0.00445 | 0.023403 | yes         |
| degS     | 19.822                    | 13.8102                     | -0.52137             | -2.03362  | 0.0045  | 0.023633 | yes         |
| yvyE     | 15.8945                   | 8.29639                     | -0.93797             | -2.02037  | 0.0046  | 0.02409  | yes         |
| licR     | 2.70222                   | 1.63985                     | -0.72058             | -2.05258  | 0.00465 | 0.024216 | yes         |
| xynB     | 0.807847                  | 0.233539                    | -1.79042             | -2.45323  | 0.00465 | 0.024216 | yes         |
| addA     | 11.6568                   | 7.76923                     | -0.58533             | -1.96083  | 0.0048  | 0.024824 | yes         |
| ribH     | 23.3712                   | 14.6386                     | -0.67496             | -2.06862  | 0.0048  | 0.024824 | yes         |
| yvaP     | 15.7146                   | 7.62072                     | -1.04411             | -2.16763  | 0.0049  | 0.025202 | yes         |

| Table S2  | value_alsS<br>High sorted | value_alsS<br>Normal sorted | log2(fold<br>change) | test_stat | p_value | q_value  | significant |
|-----------|---------------------------|-----------------------------|----------------------|-----------|---------|----------|-------------|
| parA      | 46.4164                   | 27.591                      | -0.75044             | -2.02701  | 0.00495 | 0.025285 | yes         |
| queF      | 10.4112                   | 5.79944                     | -0.84415             | -2.09839  | 0.00495 | 0.025285 | yes         |
| yneJ      | 68.0224                   | 47.8543                     | -0.50736             | -1.98738  | 0.00495 | 0.025285 | yes         |
| glcP      | 1.73317                   | 0.811434                    | -1.09486             | -2.12253  | 0.00505 | 0.02569  | yes         |
| gmuR      | 2.49005                   | 0.818488                    | -1.60514             | -2.46076  | 0.00505 | 0.02569  | yes         |
| yhjO      | 1.09623                   | 0.247664                    | -2.14609             | -2.65033  | 0.0051  | 0.025909 | yes         |
| ndoA      | 125.659                   | 89.2364                     | -0.49381             | -1.92668  | 0.00545 | 0.027463 | yes         |
| yoal      | 1.02314                   | 0.394553                    | -1.37472             | -2.21199  | 0.0056  | 0.02803  | yes         |
| uvrC      | 3.00145                   | 1.87215                     | -0.68096             | -1.9585   | 0.0057  | 0.028341 | yes         |
| queG      | 1.51965                   | 0.643213                    | -1.24037             | -2.19092  | 0.00575 | 0.028551 | yes         |
| yukJ      | 7.34066                   | 4.29552                     | -0.77308             | -2.01385  | 0.00585 | 0.02878  | yes         |
| yjdH      | 5.74325                   | 1.09798                     | -2.38702             | -2.79774  | 0.00585 | 0.02878  | yes         |
| yaaT      | 33.2569                   | 23.498                      | -0.50111             | -1.97007  | 0.006   | 0.029402 | yes         |
| ydeK      | 1.85335                   | 0.674533                    | -1.45817             | -2.24719  | 0.006   | 0.029402 | yes         |
| yusE      | 12.6702                   | 5.55604                     | -1.18931             | -2.14344  | 0.0061  | 0.029736 | yes         |
| noc       | 48.3875                   | 34.7502                     | -0.47761             | -1.91232  | 0.0061  | 0.029736 | yes         |
| bacC      | 21.7552                   | 14.9964                     | -0.53675             | -1.97414  | 0.00615 | 0.02994  | yes         |
| pstC      | 2.79684                   | 0.515261                    | -2.44042             | -3.12825  | 0.0062  | 0.030105 | yes         |
| yyaD      | 1.32383                   | 0.254545                    | -2.37872             | -2.72151  | 0.0062  | 0.030105 | yes         |
| yheC      | 1.7597                    | 0.319515                    | -2.46137             | -2.75735  | 0.00625 | 0.030269 | yes         |
| yomL      | 3.07733                   | 1.36841                     | -1.16918             | -2.12996  | 0.00625 | 0.030269 | yes         |
| ywbO      | 5.70831                   | 3.03293                     | -0.91235             | -2.0244   | 0.00645 | 0.031117 | yes         |
| pcfA      | 5.17063                   | 2.07593                     | -1.31658             | -2.16192  | 0.0065  | 0.031317 | yes         |
| yrkK      | 5.06522                   | 2.20411                     | -1.20043             | -2.08015  | 0.0066  | 0.031758 | yes         |
| yuxH      | 3.41924                   | 2.03001                     | -0.75219             | -1.93052  | 0.00675 | 0.032397 | yes         |
| trnS-Leu1 | 3966.55                   | 2474.37                     | -0.68083             | -1.93709  | 0.0068  | 0.032595 | yes         |
| ytdP      | 0.922542                  | 0.474976                    | -0.95776             | -2.00754  | 0.007   | 0.033425 | yes         |
| yobF      | 6.32109                   | 3.94478                     | -0.68023             | -1.93502  | 0.00705 | 0.03362  | yes         |
| bglA      | 2.31557                   | 1.31826                     | -0.81274             | -1.97384  | 0.0071  | 0.033773 | yes         |
| csbB      | 10.269                    | 6.89045                     | -0.57563             | -1.91737  | 0.0071  | 0.033773 | yes         |
| oxaAB     | 14.6789                   | 9.96017                     | -0.55951             | -1.92473  | 0.0072  | 0.034205 | yes         |
| ebrA      | 8.21672                   | 2.2799                      | -1.84959             | -2.40219  | 0.0074  | 0.035066 | yes         |
| ykfC      | 6.43451                   | 3.31814                     | -0.95546             | -1.97135  | 0.0075  | 0.035271 | yes         |
| yvhJ      | 13.9798                   | 9.25147                     | -0.59559             | -1.90883  | 0.0075  | 0.035271 | yes         |
| pbpC      | 17.0353                   | 12.2554                     | -0.47511             | -1.89731  | 0.00755 | 0.035417 | yes         |
| yoaK      | 5.7226                    | 3.25621                     | -0.81348             | -1.94802  | 0.00755 | 0.035417 | yes         |
| ydeM      | 10.3984                   | 5.70745                     | -0.86544             | -1.94807  | 0.00805 | 0.037064 | yes         |
| ytrl      | 3.99234                   | 1.50627                     | -1.40625             | -2.00152  | 0.00805 | 0.037064 | yes         |
| racE      | 19.5261                   | 13.7421                     | -0.5068              | -1.86461  | 0.0082  | 0.037569 | yes         |
| yngB      | 5.93505                   | 3.6631                      | -0.69619             | -1.91763  | 0.00825 | 0.037706 | yes         |
| yrkL      | 13.6905                   | 8.65883                     | -0.66094             | -1.86431  | 0.0083  | 0.037888 | yes         |
| trpB      | 21.1254                   | 12.8446                     | -0.71782             | -1.90548  | 0.00835 | 0.03807  | yes         |
| ybdJ      | 13.1838                   | 8.58368                     | -0.6191              | -1.91843  | 0.00845 | 0.038432 | yes         |
| trnJ-Val  | 2221.75                   | 1145.67                     | -0.9555              | -1.9674   | 0.00855 | 0.038792 | yes         |

| Table S2 | value_alsS<br>High sorted | value_alsS<br>Normal sorted | log2(fold<br>change) | test_stat | p_value | q_value  | significant |
|----------|---------------------------|-----------------------------|----------------------|-----------|---------|----------|-------------|
| yrkJ     | 1.57201                   | 0.470543                    | -1.74022             | -2.26618  | 0.0088  | 0.039733 | yes         |
| ywmB     | 48.1771                   | 34.6669                     | -0.47479             | -1.8876   | 0.0088  | 0.039733 | yes         |
| trnB-Lys | 2245.01                   | 1198.56                     | -0.90541             | -1.87649  | 0.00895 | 0.040216 | yes         |
| yrkN     | 3.6186                    | 1.52866                     | -1.24317             | -2.07205  | 0.009   | 0.040295 | yes         |
| yeeG     | 1.27706                   | 0.428369                    | -1.5759              | -2.24585  | 0.00915 | 0.040771 | yes         |
| recX     | 9.66307                   | 6.29764                     | -0.61767             | -1.87501  | 0.00935 | 0.041514 | yes         |
| ypmA     | 402.133                   | 267.513                     | -0.58807             | -1.87598  | 0.00935 | 0.041514 | yes         |
| metA     | 10.03                     | 6.73497                     | -0.57458             | -1.85089  | 0.00945 | 0.041759 | yes         |
| dnaN     | 16.4102                   | 11.7592                     | -0.4808              | -1.83645  | 0.0095  | 0.041881 | yes         |
| ykvO     | 1.7085                    | 0.476509                    | -1.84216             | -2.30631  | 0.0095  | 0.041881 | yes         |
| yndF     | 1.2282                    | 0.481448                    | -1.35109             | -2.0622   | 0.00955 | 0.042052 | yes         |
| yqgW     | 105.876                   | 54.2715                     | -0.96411             | -2.00496  | 0.00965 | 0.042392 | yes         |
| yyaC     | 3.18008                   | 1.43362                     | -1.1494              | -1.95974  | 0.0098  | 0.042799 | yes         |
| yxIE     | 73.0733                   | 24.278                      | -1.5897              | -1.90778  | 0.00985 | 0.042917 | yes         |
| ykfD     | 3.85363                   | 2.32931                     | -0.72632             | -1.82404  | 0.0099  | 0.043085 | yes         |
| ysxD     | 5.42613                   | 2.64668                     | -1.03574             | -1.96777  | 0.01015 | 0.043968 | yes         |
| trpC     | 15.9593                   | 7.89821                     | -1.0148              | -1.86492  | 0.01025 | 0.044298 | yes         |
| divIB    | 10.5013                   | 6.53466                     | -0.68438             | -1.82325  | 0.0105  | 0.044859 | yes         |
| yjiA     | 11.3296                   | 3.54252                     | -1.67725             | -2.19054  | 0.0105  | 0.044859 | yes         |
| kbl      | 0.921709                  | 0.258706                    | -1.833               | -2.25247  | 0.01065 | 0.045396 | yes         |
| ykuG     | 4.81077                   | 3.24518                     | -0.56797             | -1.85142  | 0.01105 | 0.046834 | yes         |
| yobO     | 1.70146                   | 1.07156                     | -0.66707             | -1.80111  | 0.0111  | 0.046939 | yes         |
| minC     | 44.8671                   | 32.7455                     | -0.45436             | -1.79214  | 0.01115 | 0.047044 | yes         |
| aprE     | 1.76963                   | 0.893532                    | -0.98586             | -1.91716  | 0.0112  | 0.047149 | yes         |
| yqeD     | 2.31403                   | 0.782487                    | -1.56427             | -2.13369  | 0.0114  | 0.047775 | yes         |
| coaX     | 9.30736                   | 6.11732                     | -0.60547             | -1.80699  | 0.0115  | 0.048086 | yes         |
| yazA     | 29.6781                   | 10.8679                     | -1.44933             | -1.83875  | 0.0117  | 0.048759 | yes         |
| ywaF     | 1.6572                    | 0.466983                    | -1.82731             | -2.1329   | 0.0117  | 0.048759 | yes         |
| ysaA     | 21.6126                   | 15.5918                     | -0.47109             | -1.74968  | 0.0119  | 0.049317 | yes         |

| Table S3 | value_als<br>S High<br>sorted | value_als<br>S Normal<br>sorted | log2(fold<br>change) | test_stat | p_value | q_value  | significant |
|----------|-------------------------------|---------------------------------|----------------------|-----------|---------|----------|-------------|
| pstBB    | 2.70345                       | 0.035469                        | -6.25212             | -2.04396  | 0.2355  | 0.401435 | no          |
| tcyL     | 2.8224                        | 0.079568                        | -5.1486              | -3.36655  | 0.17855 | 0.335722 | no          |
| spolIID  | 22.5438                       | 0.719512                        | -4.96957             | -5.6515   | 0.04395 | 0.129118 | no          |
| pstBA    | 3.84998                       | 0.16272                         | -4.56439             | -3.46234  | 0.02495 | 0.085158 | no          |
| glnQ     | 1.04032                       | 0.049545                        | -4.39214             | -1.819    | 0.25335 | 0.416377 | no          |
| gmuA     | 3.02746                       | 0.1558                          | -4.28035             | -1.98368  | 0.23795 | 0.403275 | no          |
| gmuB     | 15.5451                       | 0.830096                        | -4.22704             | -3.01606  | 0.0318  | 0.102985 | no          |
| yqxG     | 0.672728                      | 0.037728                        | -4.1563              | -1.65296  | 0.25335 | 0.416377 | no          |
| yngHA    | 0.311003                      | 0.018185                        | -4.09608             | 0         | 1       | 1        | no          |
| trnJ-Arg | 387.448                       | 22.7751                         | -4.08847             | -6.7263   | 0.2355  | 0.401435 | no          |
| ydfR     | 0.685614                      | 0.054855                        | -3.64369             | -1.51154  | 0.25335 | 0.416377 | no          |
| yvdQ     | 0.797718                      | 0.06628                         | -3.58924             | -1.28602  | 0.23585 | 0.40158  | no          |
| ybcF     | 4.00528                       | 0.333022                        | -3.58821             | -2.93297  | 0.01765 | 0.066236 | no          |
| yusQ     | 1.64943                       | 0.143414                        | -3.52371             | -1.83036  | 0.25355 | 0.416421 | no          |
| ybcH     | 3.01997                       | 0.278714                        | -3.43768             | -2.23883  | 0.2536  | 0.416421 | no          |
| ymzE     | 26.0611                       | 2.40786                         | -3.43607             | -1.23662  | 0.14485 | 0.292147 | no          |
| yzkR     | 8.15119                       | 0.75398                         | -3.43441             | -1.46714  | 0.1487  | 0.297759 | no          |
| yhcV     | 0.98491                       | 0.09329                         | -3.4002              | -1.32621  | 0.2367  | 0.402476 | no          |
| yqbT     | 0.314051                      | 0.030896                        | -3.34553             | 0         | 1       | 1        | no          |
| spsA     | 0.359399                      | 0.036217                        | -3.31086             | 0         | 1       | 1        | no          |
| kamB     | 0.410064                      | 0.041707                        | -3.29748             | 0         | 1       | 1        | no          |
| yqcC     | 0.711349                      | 0.074879                        | -3.24793             | -2.0137   | 0.0759  | 0.186454 | no          |
| yycE     | 1.11843                       | 0.119824                        | -3.22248             | -1.56248  | 0.2544  | 0.417267 | no          |
| yngF     | 0.419371                      | 0.044939                        | -3.2222              | 0         | 1       | 1        | no          |
| xkdB     | 0.379813                      | 0.041116                        | -3.20752             | 0         | 1       | 1        | no          |
| yvfR     | 0.593276                      | 0.066355                        | -3.16042             | -1.89147  | 0.09885 | 0.224244 | no          |
| ydzT     | 54.7086                       | 6.27172                         | -3.12484             | -3.67414  | 0.23825 | 0.403275 | no          |
| cotV     | 1.22295                       | 0.141109                        | -3.11548             | -1.5873   | 0.25445 | 0.417267 | no          |
| ysxE     | 0.216466                      | 0.025006                        | -3.11377             | 0         | 1       | 1        | no          |
| yhcO     | 0.221216                      | 0.026865                        | -3.04164             | 0         | 1       | 1        | no          |
| alrB     | 0.7966                        | 0.100633                        | -2.98475             | -2.20253  | 0.02915 | 0.096154 | no          |
| hutH     | 0.397244                      | 0.050801                        | -2.96709             | 0         | 1       | 1        | no          |
| yisN     | 0.417136                      | 0.053395                        | -2.96574             | 0         | 1       | 1        | no          |
| yteP     | 0.261943                      | 0.034172                        | -2.93837             | 0         | 1       | 1        | no          |
| glnH     | 0.252631                      | 0.033237                        | -2.92618             | 0         | 1       | 1        | no          |
| yqbK     | 0.515189                      | 0.068737                        | -2.90595             | -2.32022  | 0.0503  | 0.139851 | no          |
| yhcQ     | 0.664279                      | 0.091191                        | -2.86483             | -1.7734   | 0.14405 | 0.291852 | no          |
| manP     | 0.288165                      | 0.041582                        | -2.79286             | 0         | 1       | 1        | no          |
| ytzL     | 27.1854                       | 3.92317                         | -2.79274             | -4.0777   | 0.02925 | 0.096314 | no          |
| uxaC     | 0.456395                      | 0.067553                        | -2.75618             | 0         | 1       | 1        | no          |
| yvrJ     | 2.93268                       | 0.447945                        | -2.71083             | -2.30561  | 0.0535  | 0.14497  | no          |
| ylbD     | 0.684932                      | 0.104629                        | -2.71068             | -1.06631  | 0.25055 | 0.414512 | no          |
| yqaN     | 0.594548                      | 0.090824                        | -2.71064             | -1.0249   | 0.25055 | 0.414512 | no          |
| yqaQ     | 0.531298                      | 0.081164                        | -2.71061             | -0.99539  | 0.25055 | 0.414512 | no          |

| Table S3 | value_als<br>S High<br>sorted | value_als<br>S Normal<br>sorted | log2(fold<br>change) | test_stat | p_value | q_value  | significant |
|----------|-------------------------------|---------------------------------|----------------------|-----------|---------|----------|-------------|
| ywzF     | 7.80105                       | 1.19884                         | -2.70202             | -2.56211  | 0.2608  | 0.42581  | no          |
| yfkQ     | 0.350595                      | 0.054338                        | -2.68977             | 0         | 1       | 1        | no          |
| yesO     | 0.12061                       | 0.019043                        | -2.66304             | 0         | 1       | 1        | no          |
| pucA     | 0.208998                      | 0.033005                        | -2.66272             | 0         | 1       | 1        | no          |
| cgeC     | 1.46358                       | 0.243865                        | -2.58534             | -1.48848  | 0.2647  | 0.429151 | no          |
| yngA     | 1.2438                        | 0.213231                        | -2.54427             | -1.64103  | 0.0387  | 0.117501 | no          |
| ytrH     | 7.81465                       | 1.35535                         | -2.52752             | -2.62095  | 0.0192  | 0.06974  | no          |
| yqbQ     | 0.301577                      | 0.052903                        | -2.51112             | 0         | 1       | 1        | no          |
| yteT     | 0.372872                      | 0.067111                        | -2.47407             | 0         | 1       | 1        | no          |
| yrbG     | 0.315604                      | 0.057388                        | -2.45929             | 0         | 1       | 1        | no          |
| yodS     | 0.231832                      | 0.042231                        | -2.45672             | 0         | 1       | 1        | no          |
| yokU     | 8.7183                        | 1.61471                         | -2.43277             | -1.98805  | 0.02915 | 0.096154 | no          |
| yjmD     | 0.303152                      | 0.057105                        | -2.40834             | 0         | 1       | 1        | no          |
| narG     | 0.157256                      | 0.02996                         | -2.39202             | 0         | 1       | 1        | no          |
| yjfC     | 0.947436                      | 0.185012                        | -2.35641             | -2.16502  | 0.02545 | 0.08647  | no          |
| lrpB     | 1.07083                       | 0.210649                        | -2.34582             | -1.49245  | 0.0408  | 0.121975 | no          |
| yodH     | 0.469937                      | 0.093438                        | -2.33039             | 0         | 1       | 1        | no          |
| yqjX     | 0.946279                      | 0.189182                        | -2.32249             | -1.17087  | 0.41015 | 0.572096 | no          |
| licB     | 5.19303                       | 1.0386                          | -2.32194             | -1.90693  | 0.0328  | 0.104859 | no          |
| yyaN     | 2.1464                        | 0.43477                         | -2.30359             | -1.36432  | 0.0848  | 0.202199 | no          |
| spolIAC  | 3.02803                       | 0.622623                        | -2.28195             | -1.41786  | 0.29565 | 0.465216 | no          |
| yqbP     | 0.218524                      | 0.044998                        | -2.27987             | 0         | 1       | 1        | no          |
| pucD     | 0.510598                      | 0.106595                        | -2.26005             | -2.19534  | 0.03145 | 0.102117 | no          |
| cotP     | 1.07892                       | 0.227147                        | -2.2479              | -1.43629  | 0.056   | 0.149681 | no          |
| bceA     | 1.63164                       | 0.343519                        | -2.24786             | -1.89113  | 0.03695 | 0.113932 | no          |
| ytbD     | 0.769761                      | 0.162524                        | -2.24376             | -2.22632  | 0.01985 | 0.071269 | no          |
| yqbD     | 0.448098                      | 0.094942                        | -2.2387              | 0         | 1       | 1        | no          |
| exuT     | 0.550403                      | 0.117176                        | -2.23181             | -1.98919  | 0.03695 | 0.113932 | no          |
| ydfS     | 0.851334                      | 0.184659                        | -2.20486             | -1.76427  | 0.0649  | 0.167823 | no          |
| pucB     | 0.669493                      | 0.148629                        | -2.17136             | -1.18619  | 0.17635 | 0.332834 | no          |
| yvaC     | 0.233672                      | 0.051897                        | -2.17078             | 0         | 1       | 1        | no          |
| gabT     | 0.725675                      | 0.163514                        | -2.14991             | -2.36588  | 0.01545 | 0.06022  | no          |
| adaA     | 0.842249                      | 0.189949                        | -2.14864             | -1.51968  | 0.18355 | 0.341493 | no          |
| uxaA     | 0.518497                      | 0.116972                        | -2.14818             | -1.79557  | 0.08965 | 0.210008 | no          |
| rhgT     | 0.595343                      | 0.135468                        | -2.13577             | -1.17796  | 0.12955 | 0.271155 | no          |
| yuzH     | 4.20395                       | 0.962853                        | -2.12636             | -2.17607  | 0.08145 | 0.195711 | no          |
| uxuA     | 0.436031                      | 0.100138                        | -2.12244             | 0         | 1       | 1        | no          |
| yqcB     | 1.44338                       | 0.333003                        | -2.11585             | -1.09155  | 0.3269  | 0.49499  | no          |
| narI     | 0.240715                      | 0.055556                        | -2.11531             | 0         | 1       | 1        | no          |
| pucM     | 4.99387                       | 1.15622                         | -2.11075             | -1.61248  | 0.0526  | 0.143573 | no          |
| lplC     | 1.04012                       | 0.242348                        | -2.10159             | -2.12821  | 0.02245 | 0.078052 | no          |
| cotG     | 1.20633                       | 0.281232                        | -2.10079             | -1.63348  | 0.05035 | 0.139886 | no          |
| xpf      | 0.72073                       | 0.169589                        | -2.08742             | -1.24593  | 0.06325 | 0.164353 | no          |
| yrzN     | 2.28893                       | 0.540962                        | -2.08107             | -1.84376  | 0.3148  | 0.484068 | no          |

| Table S3 | value_als<br>S High<br>sorted | value_als<br>S Normal<br>sorted | log2(fold<br>change) | test_stat | p_value | q_value  | significant |
|----------|-------------------------------|---------------------------------|----------------------|-----------|---------|----------|-------------|
| yyzB     | 9.67162                       | 2.31026                         | -2.0657              | -1.31944  | 0.09575 | 0.220154 | no          |
| yqbS     | 0.485961                      | 0.116616                        | -2.05908             | 0         | 1       | 1        | no          |
| ysisU    | 0.707934                      | 0.169923                        | -2.05873             | -1.63052  | 0.0889  | 0.208775 | no          |
| yqil     | 1.02819                       | 0.249285                        | -2.04424             | -1.82222  | 0.05395 | 0.145451 | no          |
| sspl     | 57.6213                       | 13.9824                         | -2.04299             | -1.53341  | 0.0697  | 0.176208 | no          |
| uxuB     | 0.267217                      | 0.064903                        | -2.04166             | 0         | 1       | 1        | no          |
| yesL     | 0.843883                      | 0.20547                         | -2.03812             | -1.28477  | 0.10725 | 0.237246 | no          |
| ykoQ     | 0.591039                      | 0.143911                        | -2.03808             | -1.52992  | 0.0697  | 0.176208 | no          |
| pucC     | 0.894954                      | 0.22175                         | -2.01288             | -1.64032  | 0.03945 | 0.118604 | no          |
| ynzE     | 2.52048                       | 0.628814                        | -2.00299             | -1.18934  | 0.10705 | 0.237055 | no          |
| pbpG     | 0.420124                      | 0.104816                        | -2.00295             | 0         | 1       | 1        | no          |
| rbfK     | 0.76214                       | 0.190303                        | -2.00176             | -1.58806  | 0.06735 | 0.172014 | no          |
| exuM     | 0.38404                       | 0.096793                        | -1.98828             | 0         | 1       | 1        | no          |
| yqbM     | 1.25924                       | 0.323814                        | -1.95931             | -1.72732  | 0.1184  | 0.254523 | no          |
| yodQ     | 0.254971                      | 0.065658                        | -1.95729             | 0         | 1       | 1        | no          |
| psiE     | 1.57939                       | 0.409168                        | -1.9486              | -1.46174  | 0.0953  | 0.21962  | no          |
| spolIP   | 0.771259                      | 0.20114                         | -1.93902             | -2.1215   | 0.01795 | 0.066825 | no          |
| rbsD     | 5.63106                       | 1.47342                         | -1.93423             | -1.91478  | 0.0297  | 0.097366 | no          |
| ykpC     | 10.6086                       | 2.78025                         | -1.93194             | -1.40056  | 0.36085 | 0.526068 | no          |
| yfiL     | 0.106691                      | 0.028073                        | -1.92616             | 0         | 1       | 1        | no          |
| prkA     | 0.356921                      | 0.094878                        | -1.91146             | 0         | 1       | 1        | no          |
| yteA     | 0.377998                      | 0.100812                        | -1.90671             | 0         | 1       | 1        | no          |
| youB     | 22.0166                       | 5.87786                         | -1.90523             | -1.53174  | 0.0651  | 0.167875 | no          |
| spolID   | 0.974935                      | 0.261513                        | -1.89842             | -2.19461  | 0.01385 | 0.055668 | no          |
| mdxE     | 0.487947                      | 0.133203                        | -1.87309             | 0         | 1       | 1        | no          |
| cwID     | 0.628889                      | 0.171748                        | -1.87251             | -1.38845  | 0.09815 | 0.223471 | no          |
| sleB     | 0.236978                      | 0.065243                        | -1.86086             | 0         | 1       | 1        | no          |
| rhgW     | 0.089042                      | 0.024808                        | -1.84368             | 0         | 1       | 1        | no          |
| sigV     | 1.17911                       | 0.330987                        | -1.83285             | -1.21177  | 0.1387  | 0.284554 | no          |
| yebG     | 30.7156                       | 8.72264                         | -1.81613             | -1.94158  | 0.0181  | 0.067116 | no          |
| yqaL     | 0.191971                      | 0.054855                        | -1.80718             | 0         | 1       | 1        | no          |
| lplA     | 0.232979                      | 0.067265                        | -1.79227             | 0         | 1       | 1        | no          |
| ykvU     | 0.268055                      | 0.077392                        | -1.79227             | 0         | 1       | 1        | no          |
| ykzQ     | 7.48365                       | 2.1802                          | -1.77928             | -1.24691  | 0.0968  | 0.221749 | no          |
| ytxO     | 0.7761                        | 0.227147                        | -1.77262             | -1.09895  | 0.10895 | 0.239415 | no          |
| hmp      | 0.178716                      | 0.052316                        | -1.77234             | 0         | 1       | 1        | no          |
| ypzA     | 7.21919                       | 2.11637                         | -1.77024             | -1.69507  | 0.04195 | 0.124714 | no          |
| yrkB     | 6.91657                       | 2.04739                         | -1.75627             | -3.54068  | 0.3809  | 0.544244 | no          |
| yqbH     | 0.431493                      | 0.127727                        | -1.75627             | 0         | 1       | 1        | no          |
| yfnF     | 0.220597                      | 0.065794                        | -1.74538             | 0         | 1       | 1        | no          |
| sigO     | 1.74621                       | 0.522198                        | -1.74156             | -1.77364  | 0.0334  | 0.105961 | no          |
| ydfC     | 0.459878                      | 0.137593                        | -1.74085             | 0         | 1       | 1        | no          |
| adaB     | 1.32628                       | 0.398457                        | -1.73489             | -1.2687   | 0.07235 | 0.180948 | no          |
| ctpB     | 0.361043                      | 0.108481                        | -1.73473             | 0         | 1       | 1        | no          |

| Table S3 | value_als<br>S High<br>sorted | value_als<br>S Normal<br>sorted | log2(fold<br>change) | test_stat | p_value | q_value  | significant |
|----------|-------------------------------|---------------------------------|----------------------|-----------|---------|----------|-------------|
| amyC     | 1.47334                       | 0.445616                        | -1.72521             | -1.92004  | 0.0196  | 0.070712 | no          |
| yhbB     | 0.764618                      | 0.232083                        | -1.7201              | -1.73131  | 0.03875 | 0.117501 | no          |
| yesN     | 0.26439                       | 0.080461                        | -1.7163              | 0         | 1       | 1        | no          |
| aldY     | 0.228593                      | 0.069997                        | -1.70742             | 0         | 1       | 1        | no          |
| spoIVB   | 0.157237                      | 0.048388                        | -1.70021             | 0         | 1       | 1        | no          |
| spoIIR   | 1.30633                       | 0.406728                        | -1.68339             | -1.73209  | 0.0333  | 0.105823 | no          |
| blt      | 0.764868                      | 0.238814                        | -1.67932             | -1.93502  | 0.01925 | 0.069854 | no          |
| csfB     | 6.11996                       | 1.9288                          | -1.66582             | -1.643    | 0.1258  | 0.266291 | no          |
| ykzS     | 7.88565                       | 2.48674                         | -1.66498             | -0.96362  | 0.16175 | 0.316014 | no          |
| yngI     | 0.492667                      | 0.157484                        | -1.6454              | 0         | 1       | 1        | no          |
| hutG     | 0.87241                       | 0.28095                         | -1.63469             | -1.66325  | 0.04255 | 0.125997 | no          |
| gerPE    | 1.76309                       | 0.570364                        | -1.62815             | -1.12965  | 0.15125 | 0.301531 | no          |
| cwlA     | 0.571187                      | 0.184827                        | -1.62779             | -1.28644  | 0.08135 | 0.195596 | no          |
| yabG     | 0.765107                      | 0.247767                        | -1.62668             | -1.60262  | 0.0447  | 0.1305   | no          |
| yetA     | 0.20904                       | 0.067756                        | -1.62535             | 0         | 1       | 1        | no          |
| yqaj     | 0.355852                      | 0.115995                        | -1.61721             | 0         | 1       | 1        | no          |
| ywzE     | 13.4968                       | 4.43738                         | -1.60484             | -0.92071  | 0.1626  | 0.316815 | no          |
| ylaJ     | 1.39292                       | 0.459093                        | -1.60125             | -1.66029  | 0.0335  | 0.106098 | no          |
| yusS     | 0.605373                      | 0.201754                        | -1.58523             | -0.76568  | 0.3802  | 0.543934 | no          |
| yraB     | 0.709201                      | 0.236396                        | -1.58499             | -0.95453  | 0.12825 | 0.269037 | no          |
| yfnH     | 0.278219                      | 0.092752                        | -1.58478             | 0         | 1       | 1        | no          |
| rhgX     | 0.180695                      | 0.060425                        | -1.58035             | 0         | 1       | 1        | no          |
| yyaO     | 6.69369                       | 2.24077                         | -1.57881             | -1.29705  | 0.1081  | 0.238469 | no          |
| yusR     | 1.80536                       | 0.606572                        | -1.57354             | -1.2342   | 0.1155  | 0.250161 | no          |
| ypeB     | 0.691634                      | 0.233929                        | -1.56394             | -1.98792  | 0.01855 | 0.068175 | no          |
| yqbO     | 0.342726                      | 0.116076                        | -1.56199             | 0         | 1       | 1        | no          |
| pyrB     | 71.5814                       | 24.3429                         | -1.55608             | -1.60954  | 0.0277  | 0.092432 | no          |
| ythA     | 0.804582                      | 0.274745                        | -1.55015             | -2.10163  | 0.0153  | 0.059885 | no          |
| polYB    | 0.482433                      | 0.16561                         | -1.54254             | 0         | 1       | 1        | no          |
| rsoA     | 10.1203                       | 3.50272                         | -1.5307              | -1.51759  | 0.0477  | 0.136144 | no          |
| lplB     | 0.714533                      | 0.247487                        | -1.52965             | -1.51656  | 0.0478  | 0.136144 | no          |
| cotI     | 0.154659                      | 0.053568                        | -1.52964             | 0         | 1       | 1        | no          |
| asnO     | 0.272692                      | 0.094475                        | -1.52926             | 0         | 1       | 1        | no          |
| yqbB     | 0.960062                      | 0.333897                        | -1.52372             | -1.60927  | 0.0443  | 0.129681 | no          |
| ynzG     | 8.92319                       | 3.10472                         | -1.5231              | -1.55259  | 0.0467  | 0.134447 | no          |
| yqiH     | 4.61048                       | 1.612                           | -1.51607             | -1.38334  | 0.0721  | 0.180564 | no          |
| ydzM     | 35.7003                       | 12.6065                         | -1.50177             | -1.7508   | 0.02825 | 0.093682 | no          |
| ywzD     | 53.1992                       | 18.8116                         | -1.49978             | -1.5269   | 0.0562  | 0.150001 | no          |
| yoaR     | 0.870133                      | 0.313473                        | -1.4729              | -1.69019  | 0.0349  | 0.109234 | no          |
| gerPB    | 2.91705                       | 1.05962                         | -1.46097             | -1.18037  | 0.18665 | 0.345196 | no          |
| ywpE     | 1.82361                       | 0.663248                        | -1.45917             | -0.88506  | 0.2213  | 0.38668  | no          |
| gerPF    | 1.42048                       | 0.517134                        | -1.45777             | -0.67933  | 0.3855  | 0.547739 | no          |
| ydgA     | 1.02075                       | 0.37168                         | -1.45749             | -0.64188  | 0.3855  | 0.547739 | no          |
| spoVIF   | 0.881366                      | 0.320951                        | -1.45739             | -0.62377  | 0.3855  | 0.547739 | no          |



| Table S3 | value_als<br>S High<br>sorted | value_als<br>S Normal<br>sorted | log2(fold<br>change) | test_stat | p_value | q_value  | significant |
|----------|-------------------------------|---------------------------------|----------------------|-----------|---------|----------|-------------|
| yraD     | 0.556625                      | 0.202733                        | -1.45713             | -0.56457  | 0.3855  | 0.547739 | no          |
| yraF     | 0.676554                      | 0.246447                        | -1.45693             | -0.91967  | 0.2867  | 0.455161 | no          |
| yurZ     | 0.321216                      | 0.11701                         | -1.45691             | 0         | 1       | 1        | no          |
| yrkE     | 1.36316                       | 0.498923                        | -1.45006             | -1.34655  | 0.08665 | 0.205039 | no          |
| yfiM     | 0.356296                      | 0.130565                        | -1.44831             | 0         | 1       | 1        | no          |
| tuaA     | 0.842942                      | 0.309719                        | -1.44447             | -1.02421  | 0.183   | 0.340809 | no          |
| yisl     | 30.9479                       | 11.4221                         | -1.43801             | -1.47465  | 0.05495 | 0.147614 | no          |
| gpr      | 0.759513                      | 0.280841                        | -1.43532             | -1.71833  | 0.0325  | 0.104616 | no          |
| yfhJ     | 7.90775                       | 2.93026                         | -1.43224             | -1.63009  | 0.03925 | 0.118289 | no          |
| phrA     | 951.328                       | 354.619                         | -1.42367             | -0.81941  | 0.22075 | 0.38608  | no          |
| yhdB     | 3.2203                        | 1.21428                         | -1.4071              | -0.80304  | 0.24745 | 0.411288 | no          |
| yoaQ     | 1.14779                       | 0.433054                        | -1.40624             | -0.73602  | 0.2364  | 0.402149 | no          |
| spoVAB   | 0.796896                      | 0.300697                        | -1.40608             | -0.70159  | 0.2648  | 0.429151 | no          |
| adhB     | 0.307076                      | 0.11607                         | -1.4036              | 0         | 1       | 1        | no          |
| ykvR     | 1.16211                       | 0.439958                        | -1.40131             | -1.34773  | 0.307   | 0.476648 | no          |
| yoxB     | 1.03232                       | 0.391178                        | -1.39999             | -1.59923  | 0.04315 | 0.127269 | no          |
| acdA     | 0.909021                      | 0.347095                        | -1.38898             | -1.21903  | 0.11835 | 0.254523 | no          |
| hutU     | 0.382144                      | 0.146146                        | -1.38671             | 0         | 1       | 1        | no          |
| ywlB     | 0.503727                      | 0.19313                         | -1.38307             | 0         | 1       | 1        | no          |
| ykcB     | 0.171846                      | 0.066248                        | -1.37518             | 0         | 1       | 1        | no          |
| yoeD     | 11.9637                       | 4.61812                         | -1.37328             | -1.53119  | 0.0528  | 0.143909 | no          |
| yrkH     | 0.373418                      | 0.144454                        | -1.37018             | 0         | 1       | 1        | no          |
| uxaB     | 0.529291                      | 0.204792                        | -1.3699              | -1.42796  | 0.0538  | 0.145361 | no          |
| slpS     | 0.242159                      | 0.093751                        | -1.36905             | 0         | 1       | 1        | no          |
| licA     | 3.02746                       | 1.17379                         | -1.36693             | -1.03776  | 0.18035 | 0.337051 | no          |
| ydeG     | 0.733657                      | 0.284568                        | -1.36633             | -1.80872  | 0.02565 | 0.086833 | no          |
| narH     | 0.255069                      | 0.099067                        | -1.36441             | 0         | 1       | 1        | no          |
| yebD     | 44.2508                       | 17.2531                         | -1.35885             | -1.64947  | 0.0323  | 0.104152 | no          |
| ytnL     | 0.456165                      | 0.178112                        | -1.35677             | 0         | 1       | 1        | no          |
| yqhH     | 0.135933                      | 0.053202                        | -1.35335             | 0         | 1       | 1        | no          |
| treA     | 0.633138                      | 0.248086                        | -1.35168             | -1.8973   | 0.01635 | 0.062939 | no          |
| yqcK     | 3.09664                       | 1.21353                         | -1.35149             | -1.70163  | 0.0312  | 0.10157  | no          |
| queD     | 7.40775                       | 2.90994                         | -1.34805             | -1.71633  | 0.02325 | 0.08031  | no          |
| xkdR     | 12.1338                       | 4.80165                         | -1.33743             | -1.45612  | 0.05355 | 0.145001 | no          |
| mdxJ     | 0.707072                      | 0.281639                        | -1.32801             | -0.92872  | 0.18575 | 0.344214 | no          |
| yitA     | 0.440421                      | 0.175969                        | -1.32356             | 0         | 1       | 1        | no          |
| phoD     | 0.370432                      | 0.148023                        | -1.32338             | 0         | 1       | 1        | no          |
| atoA     | 0.3802                        | 0.1521                          | -1.32174             | 0         | 1       | 1        | no          |
| yngJ     | 0.069344                      | 0.027743                        | -1.32164             | 0         | 1       | 1        | no          |
| xynP     | 0.632408                      | 0.256267                        | -1.30321             | -1.69789  | 0.0334  | 0.105961 | no          |
| bltD     | 2.03268                       | 0.829032                        | -1.29389             | -1.39911  | 0.0641  | 0.16633  | no          |
| spsF     | 0.534503                      | 0.218895                        | -1.28796             | -0.95785  | 0.19075 | 0.350349 | no          |
| yhfM     | 0.583283                      | 0.240843                        | -1.2761              | -0.65887  | 0.23375 | 0.40001  | no          |
| spolIIA  | 0.156672                      | 0.0647                          | -1.2759              | 0         | 1       | 1        | no          |

| Table S3 | value_als<br>S High<br>sorted | value_als<br>S Normal<br>sorted | log2(fold<br>change) | test_stat | p_value | q_value  | significant |
|----------|-------------------------------|---------------------------------|----------------------|-----------|---------|----------|-------------|
| ydeQ     | 2.05384                       | 0.848391                        | -1.27552             | -1.69273  | 0.02965 | 0.097287 | no          |
| yqfZ     | 1.2415                        | 0.513725                        | -1.27302             | -0.89108  | 0.26445 | 0.429151 | no          |
| xsa      | 0.554754                      | 0.229668                        | -1.2723              | -1.6082   | 0.0353  | 0.109933 | no          |
| ynxB     | 11.1517                       | 4.64948                         | -1.26212             | -1.93703  | 0.01295 | 0.052675 | no          |
| ykcC     | 0.61586                       | 0.256955                        | -1.26109             | -1.28946  | 0.0854  | 0.20337  | no          |
| ygaB     | 2.23985                       | 0.936382                        | -1.25823             | -1.09764  | 0.1446  | 0.292116 | no          |
| yusW     | 1.19903                       | 0.506772                        | -1.24246             | -0.97891  | 0.1741  | 0.330593 | no          |
| yybH     | 4.95307                       | 2.09746                         | -1.23968             | -1.80895  | 0.0214  | 0.07496  | no          |
| yxcD     | 6.77916                       | 2.87802                         | -1.23603             | -1.63696  | 0.03515 | 0.109649 | no          |
| spoVAC   | 0.433639                      | 0.1862                          | -1.21964             | 0         | 1       | 1        | no          |
| gerPD    | 10.5519                       | 4.53213                         | -1.21925             | -0.73997  | 0.35105 | 0.517514 | no          |
| yfnE     | 0.480888                      | 0.206699                        | -1.21817             | 0         | 1       | 1        | no          |
| yoZF     | 0.485282                      | 0.208921                        | -1.21587             | 0         | 1       | 1        | no          |
| ydjJ     | 0.696921                      | 0.301777                        | -1.20751             | -1.38943  | 0.06025 | 0.157655 | no          |
| tuaC     | 0.777479                      | 0.337783                        | -1.20271             | -1.48043  | 0.05125 | 0.141231 | no          |
| levB     | 0.183803                      | 0.080444                        | -1.19211             | 0         | 1       | 1        | no          |
| yyzE     | 7.27395                       | 3.19505                         | -1.1869              | -1.03517  | 0.14915 | 0.2983   | no          |
| yitG     | 0.697175                      | 0.306437                        | -1.18593             | -1.5426   | 0.0399  | 0.119668 | no          |
| tuaG     | 1.30454                       | 0.577232                        | -1.17631             | -1.51386  | 0.04065 | 0.121624 | no          |
| tcyN     | 0.760295                      | 0.339913                        | -1.16139             | -1.10106  | 0.1521  | 0.302096 | no          |
| ykzB     | 38.1999                       | 17.1196                         | -1.15792             | -1.2471   | 0.09705 | 0.222164 | no          |
| yrzK     | 21.5449                       | 9.66579                         | -1.15638             | -1.08306  | 0.1409  | 0.287286 | no          |
| ykvQ     | 2.16252                       | 0.970416                        | -1.15604             | -1.7037   | 0.0212  | 0.074469 | no          |
| ymzE     | 706.952                       | 318.696                         | -1.14943             | -1.17795  | 0.404   | 0.566693 | no          |
| yvdP     | 0.986578                      | 0.445097                        | -1.14831             | -1.85388  | 0.01475 | 0.058344 | no          |
| mmgE     | 0.54689                       | 0.247212                        | -1.1455              | -1.46161  | 0.05095 | 0.140924 | no          |
| ywcA     | 0.470698                      | 0.213246                        | -1.14228             | 0         | 1       | 1        | no          |
| cypD     | 0.179286                      | 0.081476                        | -1.13782             | 0         | 1       | 1        | no          |
| yclH     | 0.454209                      | 0.206559                        | -1.1368              | 0         | 1       | 1        | no          |
| glsA     | 0.189156                      | 0.086085                        | -1.13574             | 0         | 1       | 1        | no          |
| tcyM     | 0.266578                      | 0.122183                        | -1.12551             | 0         | 1       | 1        | no          |
| natA     | 1.27547                       | 0.586307                        | -1.1213              | -1.47346  | 0.0515  | 0.141502 | no          |
| ydfJ     | 0.359347                      | 0.165708                        | -1.11673             | 0         | 1       | 1        | no          |
| yrkl     | 1.24727                       | 0.575362                        | -1.11624             | -0.54009  | 0.435   | 0.597165 | no          |
| yppG     | 0.642431                      | 0.296502                        | -1.1155              | -0.65749  | 0.3123  | 0.481275 | no          |
| yitE     | 0.132174                      | 0.06101                         | -1.11532             | 0         | 1       | 1        | no          |
| yvfS     | 0.422124                      | 0.194851                        | -1.1153              | 0         | 1       | 1        | no          |
| rhgP     | 0.15538                       | 0.071724                        | -1.11527             | 0         | 1       | 1        | no          |
| spsE     | 0.37829                       | 0.174715                        | -1.11449             | 0         | 1       | 1        | no          |
| spoVK    | 0.510494                      | 0.236441                        | -1.11042             | -1.12372  | 0.1389  | 0.284554 | no          |
| ykoN     | 0.364102                      | 0.168735                        | -1.10958             | 0         | 1       | 1        | no          |
| yvaD     | 7.94394                       | 3.68335                         | -1.10883             | -1.43488  | 0.0443  | 0.129681 | no          |
| yisJ     | 0.216929                      | 0.100861                        | -1.10486             | 0         | 1       | 1        | no          |
| putM     | 0.221533                      | 0.103001                        | -1.10486             | 0         | 1       | 1        | no          |

| Table S3 | value_als<br>S High<br>sorted | value_als<br>S Normal<br>sorted | log2(fold<br>change) | test_stat | p_value | q_value  | significant |
|----------|-------------------------------|---------------------------------|----------------------|-----------|---------|----------|-------------|
| yhcC     | 2.38772                       | 1.11099                         | -1.10379             | -1.07785  | 0.1249  | 0.265288 | no          |
| yisX     | 3.07695                       | 1.43384                         | -1.10162             | -1.94319  | 0.01255 | 0.051496 | no          |
| pdaA     | 0.958686                      | 0.447105                        | -1.10045             | -1.31158  | 0.0803  | 0.194298 | no          |
| yobA     | 2.48131                       | 1.15823                         | -1.09918             | -1.04163  | 0.1366  | 0.281027 | no          |
| ntdB     | 2.01738                       | 0.944971                        | -1.09414             | -1.47402  | 0.04795 | 0.136364 | no          |
| albG     | 1.88846                       | 0.884961                        | -1.09352             | -0.94331  | 0.2011  | 0.362407 | no          |
| yqbF     | 1.27629                       | 0.598131                        | -1.09343             | -0.58952  | 0.3404  | 0.508829 | no          |
| yycP     | 0.343688                      | 0.161367                        | -1.09075             | 0         | 1       | 1        | no          |
| yzkD     | 5.46001                       | 2.56852                         | -1.08797             | -2.50934  | 0.43005 | 0.591893 | no          |
| hutI     | 0.817698                      | 0.384761                        | -1.08761             | -1.51082  | 0.04185 | 0.124516 | no          |
| yhbH     | 0.819298                      | 0.386678                        | -1.08326             | -1.51622  | 0.0427  | 0.126241 | no          |
| ydzP     | 4.24498                       | 2.00382                         | -1.08301             | -2.46006  | 0.2615  | 0.426393 | no          |
| spoIIAD  | 0.217679                      | 0.103065                        | -1.07864             | 0         | 1       | 1        | no          |
| gerPC    | 1.02515                       | 0.485569                        | -1.07809             | -1.06177  | 0.1422  | 0.289202 | no          |
| amyD     | 1.15201                       | 0.547627                        | -1.07288             | -1.32764  | 0.06765 | 0.172427 | no          |
| yobH     | 0.895326                      | 0.425633                        | -1.07281             | -1.04076  | 0.13565 | 0.279947 | no          |
| ywrK     | 0.853052                      | 0.405938                        | -1.07137             | -1.63144  | 0.02825 | 0.093682 | no          |
| yndD     | 0.335606                      | 0.160498                        | -1.06421             | 0         | 1       | 1        | no          |
| rpsNB    | 1.43351                       | 0.687462                        | -1.0602              | -1.04371  | 0.3229  | 0.491801 | no          |
| ytII     | 1.58422                       | 0.765602                        | -1.04911             | -1.75895  | 0.01985 | 0.071269 | no          |
| ylaD     | 2.89271                       | 1.39803                         | -1.04902             | -0.79219  | 0.24665 | 0.410607 | no          |
| yyzI     | 10.2846                       | 4.97095                         | -1.0489              | -1.17914  | 0.0977  | 0.222696 | no          |
| yddN     | 0.760529                      | 0.367823                        | -1.04799             | -1.32109  | 0.0735  | 0.182844 | no          |
| tadA     | 4.36809                       | 2.11977                         | -1.0431              | -1.77721  | 0.0174  | 0.065761 | no          |
| yrzE     | 0.763117                      | 0.3724                          | -1.03505             | -0.73565  | 0.2763  | 0.442412 | no          |
| mdxD     | 0.4938                        | 0.24181                         | -1.03005             | 0         | 1       | 1        | no          |
| spsB     | 0.27744                       | 0.135921                        | -1.02941             | 0         | 1       | 1        | no          |
| spsC     | 0.373012                      | 0.1831                          | -1.02659             | 0         | 1       | 1        | no          |
| yycD     | 5.95648                       | 2.93163                         | -1.02275             | -0.70893  | 0.28745 | 0.455964 | no          |
| trpF     | 12.3618                       | 6.08817                         | -1.02181             | -1.27198  | 0.07555 | 0.186084 | no          |
| ydck     | 5.96635                       | 2.94092                         | -1.02058             | -1.87786  | 0.01225 | 0.050599 | no          |
| ydzT     | 11.5053                       | 5.68551                         | -1.01694             | -1.61277  | 0.03555 | 0.110344 | no          |
| araB     | 0.560996                      | 0.277358                        | -1.01624             | -1.45844  | 0.04915 | 0.138379 | no          |
| spmA     | 0.727166                      | 0.360339                        | -1.01293             | -0.75854  | 0.2526  | 0.41606  | no          |
| xkdU     | 3.8671                        | 1.91746                         | -1.01206             | -1.03252  | 0.1504  | 0.300317 | no          |
| yrbD     | 1.00679                       | 0.499932                        | -1.00995             | -1.76877  | 0.0192  | 0.06974  | no          |
| ykvN     | 5.31897                       | 2.64273                         | -1.00912             | -1.44374  | 0.04945 | 0.138416 | no          |
| mdxK     | 0.915279                      | 0.457441                        | -1.00063             | -1.76478  | 0.0156  | 0.060741 | no          |
| -        | 19.7392                       | 9.87085                         | -0.99981             | -5.18372  | 0.4569  | 0.614778 | no          |
| yhgB     | 3.13219                       | 1.57258                         | -0.99404             | -0.97832  | 0.2035  | 0.365322 | no          |
| mdxF     | 0.605713                      | 0.304311                        | -0.99309             | -1.29571  | 0.08125 | 0.195596 | no          |
| bglS     | 2.81546                       | 1.41573                         | -0.99183             | -1.83967  | 0.0144  | 0.057508 | no          |
| dacF     | 0.287619                      | 0.144764                        | -0.99046             | 0         | 1       | 1        | no          |
| spoIIM   | 0.510786                      | 0.257453                        | -0.98841             | -0.7412   | 0.33355 | 0.501197 | no          |

| Table S3  | value_als<br>S High<br>sorted | value_als<br>S Normal<br>sorted | log2(fold<br>change) | test_stat | p_value | q_value  | significant |
|-----------|-------------------------------|---------------------------------|----------------------|-----------|---------|----------|-------------|
| yxjC      | 0.185872                      | 0.093691                        | -0.98833             | 0         | 1       | 1        | no          |
| cyeB      | 0.516488                      | 0.260971                        | -0.98485             | -0.92571  | 0.1947  | 0.355159 | no          |
| queC      | 6.41319                       | 3.24313                         | -0.98366             | -1.30445  | 0.0795  | 0.192762 | no          |
| pyrC      | 55.225                        | 27.9659                         | -0.98166             | -1.2038   | 0.0861  | 0.204125 | no          |
| yesS      | 0.300555                      | 0.152275                        | -0.98095             | 0         | 1       | 1        | no          |
| yraM      | 0.453356                      | 0.229989                        | -0.97908             | 0         | 1       | 1        | no          |
| trnD-Leu1 | 863.664                       | 440.298                         | -0.97199             | -1.76878  | 0.0185  | 0.068175 | no          |
| yheJ      | 24.2462                       | 12.3667                         | -0.97129             | -0.94051  | 0.21775 | 0.383347 | no          |
| bofC      | 4.38054                       | 2.23614                         | -0.9701              | -1.75306  | 0.0179  | 0.066705 | no          |
| yrhD      | 1.11533                       | 0.572283                        | -0.96267             | -0.86994  | 0.23725 | 0.402861 | no          |
| araN      | 0.284736                      | 0.146121                        | -0.96247             | 0         | 1       | 1        | no          |
| sodF      | 0.34455                       | 0.177076                        | -0.96035             | 0         | 1       | 1        | no          |
| ywhK      | 0.418425                      | 0.215467                        | -0.95751             | 0         | 1       | 1        | no          |
| ylzH      | 22.3295                       | 11.513                          | -0.95569             | -0.90368  | 0.2236  | 0.389321 | no          |
| ykzN      | 11.1494                       | 5.75179                         | -0.95489             | -0.61651  | 0.38075 | 0.544244 | no          |
| glpQA     | 0.882938                      | 0.456611                        | -0.95135             | -1.20964  | 0.0999  | 0.226077 | no          |
| stoA      | 1.2205                        | 0.631499                        | -0.95062             | -0.88675  | 0.1968  | 0.357244 | no          |
| ydfK      | 1.33749                       | 0.692706                        | -0.94922             | -1.24356  | 0.08605 | 0.204125 | no          |
| yizA      | 1.44056                       | 0.746567                        | -0.94829             | -0.9643   | 0.177   | 0.333797 | no          |
| glpP      | 1.1887                        | 0.61643                         | -0.94738             | -1.6498   | 0.0235  | 0.081099 | no          |
| manA      | 0.495711                      | 0.257848                        | -0.94298             | 0         | 1       | 1        | no          |
| ldcA      | 3.58146                       | 1.86332                         | -0.94267             | -1.41446  | 0.0531  | 0.144305 | no          |
| yhxC      | 0.77598                       | 0.404245                        | -0.94079             | -1.11429  | 0.13095 | 0.272661 | no          |
| mstX      | 0.756866                      | 0.394796                        | -0.93893             | -0.49851  | 0.62695 | 0.755659 | no          |
| narJ      | 0.28357                       | 0.147959                        | -0.93851             | 0         | 1       | 1        | no          |
| malA      | 0.96627                       | 0.504977                        | -0.93621             | -1.56572  | 0.0341  | 0.107542 | no          |
| yobN      | 1.23985                       | 0.651862                        | -0.92752             | -1.75496  | 0.017   | 0.064774 | no          |
| ytfJ      | 0.891192                      | 0.470833                        | -0.92052             | -0.71318  | 0.32535 | 0.493319 | no          |
| spoVAEA   | 0.50063                       | 0.264763                        | -0.91905             | 0         | 1       | 1        | no          |
| ebrB      | 3.5095                        | 1.86449                         | -0.91248             | -1.0795   | 0.13035 | 0.272219 | no          |
| spoVAA    | 0.301183                      | 0.160697                        | -0.9063              | 0         | 1       | 1        | no          |
| ywhL      | 0.651592                      | 0.348408                        | -0.90319             | -1.27919  | 0.0828  | 0.198699 | no          |
| ybcI      | 1.73429                       | 0.92842                         | -0.90149             | -0.80348  | 0.25325 | 0.416377 | no          |
| yhaR      | 1.59128                       | 0.852076                        | -0.90113             | -1.36921  | 0.0601  | 0.157483 | no          |
| yisZ      | 0.874731                      | 0.469582                        | -0.89746             | -0.7316   | 0.25785 | 0.422101 | no          |
| yyaM      | 1.07551                       | 0.577543                        | -0.89702             | -1.23351  | 0.10175 | 0.229291 | no          |
| yvrP      | 55.6456                       | 29.9123                         | -0.89553             | -1.66792  | 0.01755 | 0.065994 | no          |
| ydbS      | 29.0295                       | 15.6286                         | -0.89333             | -1.62932  | 0.02395 | 0.082423 | no          |
| ydzT      | 56.4051                       | 30.3668                         | -0.89333             | -0.83924  | 0.2186  | 0.383933 | no          |
| ydeF      | 1.54654                       | 0.834448                        | -0.89015             | -1.83605  | 0.0132  | 0.053517 | no          |
| rhgZ      | 0.133657                      | 0.072133                        | -0.88981             | 0         | 1       | 1        | no          |
| trnD-Phe  | 515.689                       | 278.438                         | -0.88915             | -0.96284  | 0.17215 | 0.328226 | no          |
| yfiF      | 0.245932                      | 0.133147                        | -0.88524             | 0         | 1       | 1        | no          |
| yisT      | 3.82966                       | 2.07502                         | -0.88409             | -1.52311  | 0.036   | 0.111463 | no          |

| Table S3 | value_als<br>S High<br>sorted | value_als<br>S Normal<br>sorted | log2(fold<br>change) | test_stat | p_value | q_value  | significant |
|----------|-------------------------------|---------------------------------|----------------------|-----------|---------|----------|-------------|
| yfnG     | 0.260918                      | 0.141499                        | -0.8828              | 0         | 1       | 1        | no          |
| yvzH     | 97.1985                       | 52.8404                         | -0.87929             | -0.47179  | 0.5042  | 0.655074 | no          |
| yqaC     | 2.22159                       | 1.21027                         | -0.87627             | -1.22044  | 0.0882  | 0.207654 | no          |
| yqgL     | 2.99374                       | 1.63501                         | -0.87265             | -1.05647  | 0.15065 | 0.300656 | no          |
| yxeA     | 1.09745                       | 0.59939                         | -0.87259             | -0.5834   | 0.43635 | 0.598359 | no          |
| spoVFB   | 0.282157                      | 0.154191                        | -0.87178             | 0         | 1       | 1        | no          |
| yhbD     | 2.13759                       | 1.16862                         | -0.87118             | -1.17259  | 0.1038  | 0.231812 | no          |
| yyaR     | 1.68655                       | 0.923379                        | -0.86908             | -1.05679  | 0.14435 | 0.291984 | no          |
| yddS     | 0.988501                      | 0.541317                        | -0.86877             | -1.44695  | 0.043   | 0.127027 | no          |
| ykvP     | 0.61461                       | 0.337249                        | -0.86586             | -1.11948  | 0.11685 | 0.252061 | no          |
| cotE     | 1.61939                       | 0.890919                        | -0.86208             | -1.07071  | 0.13805 | 0.283386 | no          |
| yaaH     | 0.538745                      | 0.297104                        | -0.85864             | -1.07146  | 0.12995 | 0.271839 | no          |
| ydfB     | 0.707778                      | 0.390549                        | -0.8578              | -0.93634  | 0.20215 | 0.363597 | no          |
| tyrZ     | 1.12938                       | 0.623499                        | -0.85707             | -1.48834  | 0.03925 | 0.118289 | no          |
| yhjR     | 0.516547                      | 0.285403                        | -0.8559              | -0.45852  | 0.5053  | 0.656275 | no          |
| trnE-Arg | 288.525                       | 159.425                         | -0.85581             | -1.22142  | 0.3102  | 0.47949  | no          |
| clsB     | 0.122417                      | 0.067653                        | -0.85558             | 0         | 1       | 1        | no          |
| ynzC     | 22.3548                       | 12.4352                         | -0.84615             | -1.43724  | 0.0503  | 0.139851 | no          |
| yizC     | 14.357                        | 7.99985                         | -0.84371             | -0.91711  | 0.2113  | 0.375354 | no          |
| yrzM     | 3.05823                       | 1.70993                         | -0.83876             | -0.82342  | 0.2435  | 0.408092 | no          |
| yktD     | 1.96481                       | 1.10033                         | -0.83646             | -1.5569   | 0.0323  | 0.104152 | no          |
| yvmB     | 1.83708                       | 1.03085                         | -0.83357             | -1.02063  | 0.14475 | 0.292147 | no          |
| yfiV     | 2.92769                       | 1.64349                         | -0.833               | -1.24494  | 0.0869  | 0.205476 | no          |
| capB     | 1.22518                       | 0.689748                        | -0.82885             | -1.45304  | 0.04495 | 0.130719 | no          |
| yeeK     | 2.06602                       | 1.16494                         | -0.8266              | -0.98157  | 0.178   | 0.335175 | no          |
| yerD     | 1.31512                       | 0.741768                        | -0.82616             | -1.70643  | 0.01875 | 0.068842 | no          |
| ytnJ     | 0.521094                      | 0.295002                        | -0.82082             | -1.03635  | 0.14085 | 0.287286 | no          |
| rghRB    | 8.76734                       | 4.97519                         | -0.81739             | -1.727    | 0.01775 | 0.066279 | no          |
| yfkR     | 1.0134                        | 0.576628                        | -0.81349             | -1.28882  | 0.07545 | 0.185961 | no          |
| ywmF     | 0.720281                      | 0.41036                         | -0.81167             | -0.58497  | 0.381   | 0.544244 | no          |
| acoR     | 0.468369                      | 0.266934                        | -0.81116             | 0         | 1       | 1        | no          |
| azlB     | 4.0489                        | 2.30937                         | -0.81003             | -1.39675  | 0.05645 | 0.15056  | no          |
| yhcN     | 0.614949                      | 0.351003                        | -0.80898             | -0.65984  | 0.35235 | 0.518333 | no          |
| yqgE     | 0.374814                      | 0.214068                        | -0.80811             | 0         | 1       | 1        | no          |
| srtA     | 4.55011                       | 2.59878                         | -0.80807             | -1.14481  | 0.1075  | 0.237518 | no          |
| yisV     | 1.16648                       | 0.666603                        | -0.80727             | -1.55323  | 0.03465 | 0.108725 | no          |
| alkA     | 2.12017                       | 1.21332                         | -0.80523             | -1.55816  | 0.03275 | 0.104859 | no          |
| ywrJ     | 0.493643                      | 0.282893                        | -0.80321             | 0         | 1       | 1        | no          |
| ymzA     | 23.5625                       | 13.5055                         | -0.80295             | -1.37053  | 0.0547  | 0.147048 | no          |
| gdh      | 0.216059                      | 0.124702                        | -0.79295             | 0         | 1       | 1        | no          |
| sigG     | 1.77484                       | 1.02635                         | -0.79016             | -1.30614  | 0.0656  | 0.168931 | no          |
| ypeQ     | 22.2108                       | 12.8703                         | -0.78722             | -0.70317  | 0.3105  | 0.47949  | no          |
| ydaB     | 1.51421                       | 0.877712                        | -0.78675             | -1.70219  | 0.0198  | 0.071227 | no          |
| rsiV     | 0.490787                      | 0.284847                        | -0.78491             | 0         | 1       | 1        | no          |

| Table S3   | value_als<br>S High<br>sorted | value_als<br>S Normal<br>sorted | log2(fold<br>change) | test_stat | p_value | q_value  | significant |
|------------|-------------------------------|---------------------------------|----------------------|-----------|---------|----------|-------------|
| spsK       | 0.823302                      | 0.479847                        | -0.77885             | -0.87555  | 0.22375 | 0.389321 | no          |
| ytvA       | 2.37664                       | 1.38576                         | -0.77825             | -1.47771  | 0.045   | 0.130763 | no          |
| yyaQ       | 9.71354                       | 5.66509                         | -0.7779              | -1.50608  | 0.03995 | 0.119722 | no          |
| mmgF       | 0.605634                      | 0.35323                         | -0.77784             | -0.85725  | 0.21915 | 0.384542 | no          |
| trnSL-Val1 | 2184.03                       | 1275.34                         | -0.77612             | -1.64265  | 0.02435 | 0.083339 | no          |
| yhjC       | 80.622                        | 47.0896                         | -0.77577             | -0.97076  | 0.1801  | 0.336921 | no          |
| yqjP       | 2.85255                       | 1.66933                         | -0.77298             | -1.72888  | 0.0174  | 0.065761 | no          |
| yeeD       | 12.8057                       | 7.50747                         | -0.77039             | -1.45123  | 0.04535 | 0.131473 | no          |
| spoVR      | 0.27797                       | 0.163018                        | -0.7699              | 0         | 1       | 1        | no          |
| pcp        | 5.75651                       | 3.38606                         | -0.76559             | -1.40217  | 0.0482  | 0.136554 | no          |
| spolIIAH   | 0.698143                      | 0.410731                        | -0.76533             | -0.69721  | 0.30295 | 0.473114 | no          |
| phoA       | 1.01772                       | 0.599862                        | -0.76264             | -1.35617  | 0.0589  | 0.155429 | no          |
| yetI       | 4.46832                       | 2.63455                         | -0.76217             | -1.37771  | 0.05345 | 0.14494  | no          |
| trnB-Glu   | 1207.88                       | 713.519                         | -0.75945             | -1.14733  | 0.10415 | 0.232454 | no          |
| yqal       | 2.5714                        | 1.52234                         | -0.75627             | -1.3323   | 0.48515 | 0.638995 | no          |
| glnM       | 0.077531                      | 0.0459                          | -0.75627             | 0         | 1       | 1        | no          |
| sspK       | 2.99806                       | 1.77493                         | -0.75627             | 0         | 1       | 1        | no          |
| sspO       | 3.45828                       | 2.04739                         | -0.75627             | 0         | 1       | 1        | no          |
| ypzC       | 13.836                        | 8.19678                         | -0.7553              | -0.9714   | 0.1716  | 0.327919 | no          |
| yhdW       | 7.97164                       | 4.72616                         | -0.75421             | -1.69939  | 0.01735 | 0.065761 | no          |
| yrdR       | 0.757358                      | 0.449602                        | -0.75233             | -0.97649  | 0.1761  | 0.332604 | no          |
| ynzJ       | 13.6276                       | 8.09036                         | -0.75226             | -0.36508  | 0.38405 | 0.547136 | no          |
| narK       | 0.450021                      | 0.267504                        | -0.75044             | 0         | 1       | 1        | no          |
| tuaA       | 7.26114                       | 4.31815                         | -0.74978             | -0.27179  | 0.6388  | 0.765003 | no          |
| degQ       | 14.1191                       | 8.40151                         | -0.74893             | -0.42305  | 0.51885 | 0.668756 | no          |
| glgD       | 0.81767                       | 0.486631                        | -0.74869             | -0.73938  | 0.3121  | 0.481165 | no          |
| ydzU       | 5.55266                       | 3.31216                         | -0.74541             | -0.64333  | 0.36385 | 0.529056 | no          |
| rhgQ       | 0.113661                      | 0.0678                          | -0.74538             | 0         | 1       | 1        | no          |
| bpsB       | 0.656466                      | 0.392056                        | -0.74366             | -0.55231  | 0.40895 | 0.571489 | no          |
| yknV       | 1.48591                       | 0.887424                        | -0.74365             | -1.72858  | 0.01905 | 0.069398 | no          |
| yngE       | 0.149998                      | 0.089596                        | -0.74343             | 0         | 1       | 1        | no          |
| pbuE       | 0.333593                      | 0.19932                         | -0.743               | 0         | 1       | 1        | no          |
| sacP       | 1.161                         | 0.693884                        | -0.7426              | -0.40668  | 0.41165 | 0.573759 | no          |
| yojJ       | 0.39186                       | 0.234472                        | -0.74092             | 0         | 1       | 1        | no          |
| ydzR       | 0.921211                      | 0.551892                        | -0.73915             | 0         | 1       | 1        | no          |
| yqbR       | 0.612129                      | 0.366919                        | -0.73837             | 0         | 1       | 1        | no          |
| mmgC       | 0.046377                      | 0.027832                        | -0.73668             | 0         | 1       | 1        | no          |
| znuC       | 4.65594                       | 2.80095                         | -0.73316             | -1.08607  | 0.12725 | 0.268296 | no          |
| yqbE       | 0.563089                      | 0.338789                        | -0.73297             | -0.79859  | 0.2647  | 0.429151 | no          |
| frIM       | 1.31576                       | 0.791821                        | -0.73265             | -1.18654  | 0.09865 | 0.224244 | no          |
| spolIQ     | 2.2825                        | 1.37398                         | -0.73225             | -1.43069  | 0.0473  | 0.13586  | no          |
| bltR       | 1.06667                       | 0.642633                        | -0.73104             | -0.9955   | 0.15795 | 0.311561 | no          |
| rsml       | 9.76828                       | 5.9036                          | -0.72651             | -1.751    | 0.01515 | 0.05936  | no          |
| yabB       | 10.0268                       | 6.06908                         | -0.72431             | -1.58076  | 0.0254  | 0.086379 | no          |

| Table S3  | value_als<br>S High<br>sorted | value_als<br>S Normal<br>sorted | log2(fold<br>change) | test_stat | p_value | q_value  | significant |
|-----------|-------------------------------|---------------------------------|----------------------|-----------|---------|----------|-------------|
| rhaD      | 1.55083                       | 0.941294                        | -0.72033             | -1.79427  | 0.0128  | 0.052292 | no          |
| addB      | 6.00945                       | 3.65581                         | -0.71704             | -1.63074  | 0.02215 | 0.077297 | no          |
| yoaN      | 0.182559                      | 0.111079                        | -0.71677             | 0         | 1       | 1        | no          |
| spoVAF    | 1.92296                       | 1.17091                         | -0.7157              | -1.66357  | 0.0197  | 0.070935 | no          |
| yitQ      | 6.51652                       | 3.96966                         | -0.71509             | -1.4951   | 0.03445 | 0.108189 | no          |
| tuaB      | 0.563763                      | 0.343983                        | -0.71275             | -0.9517   | 0.18265 | 0.340327 | no          |
| yxjO      | 1.90426                       | 1.16193                         | -0.7127              | -1.31232  | 0.06705 | 0.171483 | no          |
| czcD      | 0.438615                      | 0.267651                        | -0.7126              | 0         | 1       | 1        | no          |
| ykoG      | 1.48932                       | 0.909452                        | -0.71158             | -1.0432   | 0.1443  | 0.291984 | no          |
| pyrAA     | 68.3588                       | 41.7925                         | -0.70988             | -0.92994  | 0.1917  | 0.351576 | no          |
| ykuT      | 4.2136                        | 2.5768                          | -0.70948             | -1.68182  | 0.02105 | 0.074292 | no          |
| yjIB      | 2.1763                        | 1.33264                         | -0.70759             | -0.97897  | 0.1739  | 0.330454 | no          |
| yjcR      | 0.440589                      | 0.269794                        | -0.70757             | 0         | 1       | 1        | no          |
| ytmO      | 0.568866                      | 0.349035                        | -0.70472             | -0.66627  | 0.3343  | 0.502122 | no          |
| nrnB      | 0.701786                      | 0.430857                        | -0.70382             | -1.00392  | 0.15755 | 0.311265 | no          |
| ywhA      | 8.20792                       | 5.04451                         | -0.7023              | -1.48656  | 0.04035 | 0.120823 | no          |
| queE      | 11.0174                       | 6.77695                         | -0.70108             | -1.66546  | 0.01965 | 0.070824 | no          |
| yknT      | 0.706113                      | 0.4352                          | -0.69822             | -0.87708  | 0.2213  | 0.38668  | no          |
| araL      | 0.585289                      | 0.360737                        | -0.69821             | -0.63685  | 0.36095 | 0.526068 | no          |
| yoZ       | 7.83201                       | 4.82758                         | -0.69808             | -0.89267  | 0.2156  | 0.381179 | no          |
| spsD      | 0.553614                      | 0.341424                        | -0.69732             | -0.69023  | 0.3244  | 0.492906 | no          |
| hutM      | 0.617375                      | 0.380985                        | -0.69641             | -1.03527  | 0.1488  | 0.297759 | no          |
| yocM      | 4.17889                       | 2.58401                         | -0.69351             | -1.15115  | 0.1077  | 0.237819 | no          |
| trnB-Gly1 | 1553.03                       | 962.046                         | -0.69091             | -1.26562  | 0.0794  | 0.192644 | no          |
| ypuB      | 5.25476                       | 3.26862                         | -0.68494             | -0.62823  | 0.6184  | 0.74971  | no          |
| trnD-Gly  | 1430.56                       | 891.142                         | -0.68285             | -1.22099  | 0.08445 | 0.201751 | no          |
| yrbE      | 3.85419                       | 2.40427                         | -0.68083             | -1.74392  | 0.015   | 0.05902  | no          |
| ycdC      | 3.01132                       | 1.87951                         | -0.68004             | -1.79129  | 0.014   | 0.056211 | no          |
| lytG      | 4.88877                       | 3.05369                         | -0.67892             | -1.74105  | 0.01595 | 0.061781 | no          |
| acoC      | 0.432844                      | 0.270613                        | -0.67762             | 0         | 1       | 1        | no          |
| yocN      | 14.9356                       | 9.33959                         | -0.67733             | -0.98645  | 0.1684  | 0.324127 | no          |
| xkdW      | 5.88553                       | 3.68412                         | -0.67585             | -0.92323  | 0.1878  | 0.346557 | no          |
| cotB      | 0.536276                      | 0.335784                        | -0.67544             | -0.84468  | 0.235   | 0.40123  | no          |
| rsfA      | 0.544821                      | 0.341687                        | -0.67311             | -0.64536  | 0.3663  | 0.531533 | no          |
| ganR      | 2.15052                       | 1.34954                         | -0.67221             | -1.40516  | 0.0537  | 0.145301 | no          |
| xkzA      | 14.7138                       | 9.23472                         | -0.67203             | -0.6104   | 0.38495 | 0.547739 | no          |
| bacA      | 20.5888                       | 12.9232                         | -0.6719              | -1.7037   | 0.0175  | 0.065872 | no          |
| yfnD      | 0.551237                      | 0.346285                        | -0.67071             | -0.73457  | 0.2989  | 0.469103 | no          |
| dacB      | 0.555846                      | 0.349605                        | -0.66896             | -0.80871  | 0.2668  | 0.431269 | no          |
| trnO-Ile  | 3182.01                       | 2003                            | -0.66778             | -1.65304  | 0.0229  | 0.079322 | no          |
| ywaE      | 10.7288                       | 6.75358                         | -0.66776             | -1.74369  | 0.0163  | 0.062811 | no          |
| rbsR      | 2.44054                       | 1.5379                          | -0.66623             | -1.43879  | 0.0473  | 0.13586  | no          |
| sinI      | 16.6881                       | 10.5238                         | -0.66517             | -0.62281  | 0.37    | 0.534667 | no          |
| ywqO      | 5.33468                       | 3.36506                         | -0.66477             | -0.50075  | 0.46765 | 0.62476  | no          |

| Table S3 | value_als<br>S High<br>sorted | value_als<br>S Normal<br>sorted | log2(fold<br>change) | test_stat | p_value | q_value  | significant |
|----------|-------------------------------|---------------------------------|----------------------|-----------|---------|----------|-------------|
| albB     | 72.684                        | 45.8934                         | -0.66335             | -0.60954  | 0.38475 | 0.547715 | no          |
| gerQ     | 0.189786                      | 0.119836                        | -0.66331             | 0         | 1       | 1        | no          |
| abfA     | 0.504876                      | 0.318888                        | -0.66288             | 0         | 1       | 1        | no          |
| txpA     | 73.9732                       | 46.8272                         | -0.65966             | -1.31179  | 0.07075 | 0.178019 | no          |
| oatA     | 0.656429                      | 0.416208                        | -0.65734             | -1.15499  | 0.1034  | 0.231557 | no          |
| xkdJ     | 7.72328                       | 4.9002                          | -0.65637             | -1.40781  | 0.04875 | 0.137799 | no          |
| polYA    | 2.05206                       | 1.30267                         | -0.6556              | -1.48381  | 0.03915 | 0.118274 | no          |
| yneQ     | 7.40799                       | 4.70421                         | -0.65513             | -0.95984  | 0.16825 | 0.324005 | no          |
| ytzl     | 29.4368                       | 18.6957                         | -0.65491             | -0.63461  | 0.38015 | 0.543934 | no          |
| yfkD     | 1.21063                       | 0.769239                        | -0.65426             | -0.94885  | 0.1794  | 0.336285 | no          |
| yyzN     | 38.011                        | 24.1552                         | -0.65408             | -0.79658  | 0.2434  | 0.408092 | no          |
| yfiU     | 2.00004                       | 1.27136                         | -0.65365             | -1.1652   | 0.10025 | 0.226731 | no          |
| yycO     | 0.576363                      | 0.366557                        | -0.65294             | -0.6229   | 0.3728  | 0.537051 | no          |
| yqhB     | 1.26606                       | 0.805751                        | -0.65194             | -1.27305  | 0.07995 | 0.193601 | no          |
| iolT     | 0.221069                      | 0.140764                        | -0.65122             | 0         | 1       | 1        | no          |
| mdxM     | 1.0356                        | 0.659777                        | -0.65042             | -0.58616  | 0.40925 | 0.571551 | no          |
| yczO     | 51.4246                       | 32.7826                         | -0.64953             | -0.97764  | 0.15965 | 0.313193 | no          |
| ogt      | 5.63196                       | 3.59393                         | -0.64807             | -0.86917  | 0.2159  | 0.381256 | no          |
| yjbl     | 14.3833                       | 9.18754                         | -0.64664             | -1.08771  | 0.12695 | 0.267814 | no          |
| lytH     | 0.686934                      | 0.439144                        | -0.64548             | -0.81711  | 0.25235 | 0.416015 | no          |
| ykkA     | 1.38846                       | 0.889493                        | -0.64243             | -0.69182  | 0.3314  | 0.499575 | no          |
| yvjA     | 2.6821                        | 1.7195                          | -0.64138             | -1.33361  | 0.06225 | 0.162093 | no          |
| bmrR     | 1.80885                       | 1.16196                         | -0.63852             | -1.13542  | 0.10615 | 0.235791 | no          |
| pucE     | 0.380846                      | 0.244839                        | -0.63738             | 0         | 1       | 1        | no          |
| ynzB     | 4.65387                       | 2.99262                         | -0.63702             | -0.34999  | 0.5778  | 0.719648 | no          |
| acoL     | 0.288776                      | 0.185909                        | -0.63536             | 0         | 1       | 1        | no          |
| yfkM     | 3.6522                        | 2.35414                         | -0.63357             | -1.13753  | 0.1088  | 0.239257 | no          |
| ylaK     | 1.58257                       | 1.02026                         | -0.63334             | -1.35378  | 0.0573  | 0.152392 | no          |
| yticD    | 2.11423                       | 1.36577                         | -0.63042             | -0.67076  | 0.3419  | 0.509574 | no          |
| trnB-Pro | 769.398                       | 498.068                         | -0.62739             | -0.89746  | 0.20435 | 0.366323 | no          |
| parB     | 38.0813                       | 24.6715                         | -0.62624             | -1.68822  | 0.01805 | 0.067063 | no          |
| ywlG     | 6.99415                       | 4.534                           | -0.62536             | -1.48136  | 0.0384  | 0.117298 | no          |
| nprB     | 0.826955                      | 0.537828                        | -0.62067             | -1.12393  | 0.11575 | 0.250412 | no          |
| ydfM     | 1.21971                       | 0.794171                        | -0.61901             | -0.97566  | 0.16795 | 0.323761 | no          |
| ydhJ     | 2.60135                       | 1.69428                         | -0.61859             | -1.36513  | 0.05745 | 0.152682 | no          |
| ybcM     | 1.1699                        | 0.762437                        | -0.6177              | -0.40783  | 0.5517  | 0.697675 | no          |
| yozM     | 1.99676                       | 1.30139                         | -0.61762             | -0.57668  | 0.4215  | 0.583567 | no          |
| cotX     | 0.425632                      | 0.277459                        | -0.61733             | 0         | 1       | 1        | no          |
| yhzB     | 2.34081                       | 1.52727                         | -0.61606             | -1.03688  | 0.139   | 0.284554 | no          |
| rbsK     | 4.26755                       | 2.79027                         | -0.613               | -1.44919  | 0.0414  | 0.123473 | no          |
| yunB     | 0.873299                      | 0.571078                        | -0.61279             | -0.73878  | 0.2884  | 0.457276 | no          |
| yczG     | 12.982                        | 8.49437                         | -0.61193             | -1.22218  | 0.08865 | 0.20845  | no          |
| spolISB  | 52.9306                       | 34.6677                         | -0.61051             | -0.61373  | 0.3866  | 0.548675 | no          |
| capA     | 0.402204                      | 0.264248                        | -0.60603             | 0         | 1       | 1        | no          |



| Table S3   | value_als<br>S High<br>sorted | value_als<br>S Normal<br>sorted | log2(fold<br>change) | test_stat | p_value | q_value  | significant |
|------------|-------------------------------|---------------------------------|----------------------|-----------|---------|----------|-------------|
| rnmV       | 9.60112                       | 6.30849                         | -0.60591             | -1.16313  | 0.10155 | 0.229116 | no          |
| trnSL-Gln2 | 5468.59                       | 3593.33                         | -0.60585             | -1.72617  | 0.01565 | 0.060809 | no          |
| yulB       | 2.32306                       | 1.52698                         | -0.60534             | -1.15     | 0.11    | 0.240903 | no          |
| yqzM       | 118.434                       | 77.861                          | -0.60512             | -0.97587  | 0.1717  | 0.327943 | no          |
| yjcl       | 2.74916                       | 1.81001                         | -0.60299             | -1.48911  | 0.03655 | 0.113072 | no          |
| putB       | 1.13974                       | 0.750785                        | -0.60224             | -0.92772  | 0.1993  | 0.360032 | no          |
| ylaC       | 1.49617                       | 0.987793                        | -0.59899             | -0.65717  | 0.3413  | 0.509507 | no          |
| ytnM       | 0.546164                      | 0.362591                        | -0.59099             | -0.64659  | 0.3479  | 0.515165 | no          |
| ycxC       | 0.867761                      | 0.577914                        | -0.58644             | -0.82092  | 0.22395 | 0.389487 | no          |
| iolJ       | 0.99853                       | 0.665483                        | -0.5854              | -0.82474  | 0.22515 | 0.390665 | no          |
| abh        | 45.2573                       | 30.1696                         | -0.58505             | -1.59703  | 0.0226  | 0.078501 | no          |
| yqxH       | 0.354601                      | 0.236396                        | -0.58499             | 0         | 1       | 1        | no          |
| yqzI       | 17.0289                       | 11.3561                         | -0.58451             | -0.48083  | 0.5204  | 0.670022 | no          |
| aroK       | 7.50398                       | 5.00693                         | -0.58373             | -1.43774  | 0.04235 | 0.125604 | no          |
| xkdH       | 14.5013                       | 9.68612                         | -0.58219             | -0.87892  | 0.2251  | 0.390665 | no          |
| ypoP       | 21.0486                       | 14.0595                         | -0.58218             | -1.68241  | 0.01935 | 0.070013 | no          |
| bmr        | 3.87838                       | 2.5915                          | -0.58167             | -1.5872   | 0.0281  | 0.093433 | no          |
| xlyA       | 7.47542                       | 4.99732                         | -0.581               | -1.71745  | 0.0161  | 0.062105 | no          |
| secE       | 75.4363                       | 50.436                          | -0.5808              | -1.18971  | 0.0983  | 0.223676 | no          |
| yqzD       | 40.8849                       | 27.3562                         | -0.5797              | -1.29403  | 0.06745 | 0.172034 | no          |
| yndE       | 0.288394                      | 0.192969                        | -0.57967             | 0         | 1       | 1        | no          |
| xkdI       | 7.28022                       | 4.87342                         | -0.57905             | -0.98746  | 0.16935 | 0.325452 | no          |
| yjdJ       | 7.46602                       | 5.00053                         | -0.57826             | -0.97459  | 0.17    | 0.325695 | no          |
| fdhD       | 3.54303                       | 2.37579                         | -0.57658             | -1.3      | 0.07025 | 0.17688  | no          |
| tuaF       | 0.808503                      | 0.542192                        | -0.57645             | -0.64173  | 0.3863  | 0.548458 | no          |
| yodE       | 1.78316                       | 1.19585                         | -0.5764              | -1.08254  | 0.12505 | 0.265456 | no          |
| ydhD       | 0.496109                      | 0.332775                        | -0.57611             | 0         | 1       | 1        | no          |
| ybfN       | 0.834841                      | 0.56023                         | -0.57548             | -0.3348   | 0.4702  | 0.627493 | no          |
| ylaB       | 0.916498                      | 0.615026                        | -0.57548             | -0.23353  | 0.77465 | 0.865254 | no          |
| yhdK       | 6.59805                       | 4.4295                          | -0.5749              | -0.46285  | 0.51765 | 0.66744  | no          |
| tgl        | 0.706247                      | 0.474248                        | -0.57453             | -0.62571  | 0.39125 | 0.552336 | no          |
| ykvT       | 0.235502                      | 0.158427                        | -0.57191             | 0         | 1       | 1        | no          |
| yozJ       | 0.514214                      | 0.346327                        | -0.57023             | 0         | 1       | 1        | no          |
| padR       | 4.36471                       | 2.9426                          | -0.5688              | -1.14795  | 0.10835 | 0.238549 | no          |
| ydzW       | 163.187                       | 110.309                         | -0.56498             | -0.44496  | 0.5363  | 0.684865 | no          |
| yslB       | 20.932                        | 14.15                           | -0.56491             | -1.67177  | 0.01745 | 0.065872 | no          |
| yfhP       | 4.66763                       | 3.15713                         | -0.56408             | -1.11874  | 0.1132  | 0.246322 | no          |
| yjdG       | 10.9741                       | 7.43527                         | -0.56164             | -1.4858   | 0.03845 | 0.117298 | no          |
| xkdP       | 3.49637                       | 2.37309                         | -0.55909             | -0.71515  | 0.32425 | 0.492906 | no          |
| yxdJ       | 2.20241                       | 1.49796                         | -0.55609             | -0.85025  | 0.228   | 0.393684 | no          |
| yugS       | 0.671719                      | 0.457079                        | -0.55541             | -0.83245  | 0.232   | 0.397927 | no          |
| xlyB       | 3.71419                       | 2.53037                         | -0.5537              | -1.3928   | 0.04825 | 0.136592 | no          |
| tatAY      | 293.963                       | 200.996                         | -0.54847             | -1.64421  | 0.0216  | 0.07559  | no          |
| nucB       | 4.49905                       | 3.07795                         | -0.54765             | -0.90912  | 0.1931  | 0.353449 | no          |

| Table S3 | value_als<br>S High<br>sorted | value_als<br>S Normal<br>sorted | log2(fold<br>change) | test_stat | p_value | q_value  | significant |
|----------|-------------------------------|---------------------------------|----------------------|-----------|---------|----------|-------------|
| ywpF     | 26.2246                       | 17.9415                         | -0.54763             | -1.65137  | 0.02    | 0.07167  | no          |
| trmB     | 15.2205                       | 10.4343                         | -0.54468             | -1.7308   | 0.01515 | 0.05936  | no          |
| ctsR     | 13.8871                       | 9.53291                         | -0.54276             | -1.46934  | 0.03935 | 0.118494 | no          |
| ywzC     | 17.023                        | 11.689                          | -0.54233             | -0.82592  | 0.23965 | 0.404278 | no          |
| levE     | 3.01811                       | 2.07353                         | -0.54156             | -0.72344  | 0.3042  | 0.473482 | no          |
| yurJ     | 2.52726                       | 1.73789                         | -0.54024             | -1.26416  | 0.0767  | 0.187802 | no          |
| fadE     | 0.681461                      | 0.468612                        | -0.54024             | -0.95231  | 0.1789  | 0.336022 | no          |
| yhzD     | 7.19516                       | 4.95087                         | -0.53934             | -0.37758  | 0.59715 | 0.735408 | no          |
| yrhE     | 0.975918                      | 0.67154                         | -0.53929             | -1.33606  | 0.05815 | 0.154104 | no          |
| yvbU     | 0.777605                      | 0.535764                        | -0.53744             | -0.68009  | 0.3308  | 0.499275 | no          |
| ygzC     | 2.11041                       | 1.45449                         | -0.53701             | -0.37586  | 0.59715 | 0.735408 | no          |
| yjpA     | 10.0815                       | 6.96449                         | -0.53362             | -0.76783  | 0.27155 | 0.436303 | no          |
| putC     | 2.01341                       | 1.3911                          | -0.53341             | -1.32176  | 0.06095 | 0.159041 | no          |
| nnrA     | 1.12057                       | 0.775455                        | -0.53112             | -0.77524  | 0.26345 | 0.428637 | no          |
| frlN     | 1.53593                       | 1.0634                          | -0.53043             | -0.92572  | 0.19165 | 0.351576 | no          |
| yqcA     | 0.35785                       | 0.247876                        | -0.52974             | 0         | 1       | 1        | no          |
| ykrP     | 0.328538                      | 0.227587                        | -0.52964             | 0         | 1       | 1        | no          |
| nudF     | 11.956                        | 8.28803                         | -0.52864             | -1.09269  | 0.1189  | 0.255303 | no          |
| dppA     | 12.1168                       | 8.41147                         | -0.52658             | -1.72791  | 0.01665 | 0.063896 | no          |
| ydfP     | 8.37896                       | 5.81724                         | -0.52644             | -1.08836  | 0.13125 | 0.273029 | no          |
| mpr      | 8.64831                       | 6.02105                         | -0.52241             | -1.50416  | 0.03305 | 0.105478 | no          |
| yqeC     | 1.19455                       | 0.8319                          | -0.52199             | -0.829    | 0.23635 | 0.402149 | no          |
| ykuD     | 0.505075                      | 0.351769                        | -0.52187             | 0         | 1       | 1        | no          |
| trnE     | 12.8551                       | 8.95376                         | -0.52177             | -1.41352  | 0.04795 | 0.136364 | no          |
| yqeB     | 13.4795                       | 9.39407                         | -0.52094             | -1.67714  | 0.0188  | 0.068958 | no          |
| msrA     | 11.1034                       | 7.74073                         | -0.52046             | -1.40475  | 0.04895 | 0.13826  | no          |
| sapB     | 2.46893                       | 1.72243                         | -0.51944             | -0.97313  | 0.16955 | 0.325501 | no          |
| glcD     | 1.2321                        | 0.861021                        | -0.517               | -0.91837  | 0.1953  | 0.356079 | no          |
| ald      | 4.68068                       | 3.27221                         | -0.51645             | -1.47904  | 0.0378  | 0.115883 | no          |
| asnH     | 43.1863                       | 30.2275                         | -0.51471             | -1.64643  | 0.0181  | 0.067116 | no          |
| yuzA     | 12.5617                       | 8.81306                         | -0.51132             | -0.72271  | 0.302   | 0.472421 | no          |
| msmR     | 0.893074                      | 0.626691                        | -0.51103             | -0.76675  | 0.2814  | 0.448846 | no          |
| yeaC     | 4.38486                       | 3.07812                         | -0.51048             | -0.89617  | 0.20265 | 0.364146 | no          |
| ydaE     | 0.706217                      | 0.496016                        | -0.50973             | -0.40788  | 0.55445 | 0.699542 | no          |
| ykuH     | 19.4154                       | 13.6397                         | -0.50938             | -1.62294  | 0.02455 | 0.08387  | no          |
| tuaD     | 0.653983                      | 0.459463                        | -0.50931             | -0.79157  | 0.262   | 0.426836 | no          |
| trnD-Glu | 863.778                       | 607.877                         | -0.50688             | -0.69664  | 0.3248  | 0.493009 | no          |
| liaG     | 8.66908                       | 6.10593                         | -0.50567             | -1.56086  | 0.02825 | 0.093682 | no          |
| yfzA     | 20.185                        | 14.2172                         | -0.50565             | -1.02258  | 0.1455  | 0.29304  | no          |
| cwIC     | 0.599612                      | 0.422415                        | -0.50537             | -0.51996  | 0.45755 | 0.615229 | no          |
| yoaZ     | 3.08952                       | 2.18083                         | -0.5025              | -0.96816  | 0.175   | 0.331532 | no          |
| proJ     | 7.744                         | 5.47133                         | -0.50119             | -1.40306  | 0.0477  | 0.136144 | no          |
| spoVFA   | 0.339505                      | 0.240246                        | -0.49892             | 0         | 1       | 1        | no          |
| ymzB     | 13.2974                       | 9.41266                         | -0.49847             | -1.13551  | 0.11105 | 0.242492 | no          |

| Table S3 | value_als<br>S High<br>sorted | value_als<br>S Normal<br>sorted | log2(fold<br>change) | test_stat | p_value | q_value  | significant |
|----------|-------------------------------|---------------------------------|----------------------|-----------|---------|----------|-------------|
| yrri     | 0.70821                       | 0.501638                        | -0.49753             | -0.69676  | 0.3138  | 0.482789 | no          |
| dnaB     | 6.26238                       | 4.44874                         | -0.49331             | -1.62889  | 0.0204  | 0.072685 | no          |
| dfrA     | 13.1575                       | 9.35027                         | -0.4928              | -1.07702  | 0.1292  | 0.27083  | no          |
| nrdR     | 7.13107                       | 5.07037                         | -0.49203             | -1.08026  | 0.1308  | 0.272661 | no          |
| ywqN     | 0.847666                      | 0.603253                        | -0.49073             | -0.46531  | 0.49395 | 0.646934 | no          |
| ybfB     | 3.0978                        | 2.208                           | -0.48851             | -1.04447  | 0.138   | 0.283386 | no          |
| spoVAD   | 0.266905                      | 0.190479                        | -0.48669             | 0         | 1       | 1        | no          |
| yraE     | 2.295                         | 1.63857                         | -0.48606             | -0.29726  | 0.44855 | 0.609271 | no          |
| yozX     | 1.50328                       | 1.07414                         | -0.48493             | -0.28979  | 0.4557  | 0.61429  | no          |
| ioll     | 1.5896                        | 1.13596                         | -0.48475             | -0.84275  | 0.2371  | 0.40279  | no          |
| yjzl     | 16.1176                       | 11.5183                         | -0.48471             | -0.54182  | 0.4493  | 0.609828 | no          |
| mcsB     | 23.1303                       | 16.531                          | -0.48461             | -0.98101  | 0.16175 | 0.316014 | no          |
| iolD     | 1.17386                       | 0.839315                        | -0.48397             | -1.09338  | 0.1254  | 0.265595 | no          |
| manR     | 0.57333                       | 0.410144                        | -0.48324             | -0.84013  | 0.23965 | 0.404278 | no          |
| treR     | 6.90278                       | 4.93845                         | -0.48312             | -1.30618  | 0.06675 | 0.17095  | no          |
| yflN     | 0.440232                      | 0.315118                        | -0.48237             | 0         | 1       | 1        | no          |
| yodT     | 0.05759                       | 0.041226                        | -0.48225             | 0         | 1       | 1        | no          |
| ywjG     | 5.34528                       | 3.82672                         | -0.48216             | -1.02987  | 0.1434  | 0.29085  | no          |
| dhaS     | 7.7597                        | 5.56453                         | -0.47974             | -1.70018  | 0.016   | 0.061847 | no          |
| yrkQ     | 1.08655                       | 0.780196                        | -0.47785             | -0.81856  | 0.24025 | 0.404278 | no          |
| pucG     | 1.38924                       | 0.997923                        | -0.4773              | -0.96348  | 0.17385 | 0.330454 | no          |
| ypqP     | 5.37208                       | 3.85914                         | -0.4772              | -0.88891  | 0.21215 | 0.376416 | no          |
| gerKB    | 0.784957                      | 0.564482                        | -0.47569             | -0.71079  | 0.30375 | 0.473373 | no          |
| yxkA     | 0.613667                      | 0.441595                        | -0.47473             | -0.36739  | 0.61275 | 0.747349 | no          |
| yfkl     | 9.64638                       | 6.94258                         | -0.47452             | -0.88292  | 0.21575 | 0.381256 | no          |
| spollGA  | 1.58367                       | 1.13989                         | -0.47438             | -0.87874  | 0.2217  | 0.387016 | no          |
| yfmD     | 9.70162                       | 6.98436                         | -0.4741              | -1.18192  | 0.09335 | 0.216637 | no          |
| gntZ     | 9.38967                       | 6.76277                         | -0.47346             | -1.7288   | 0.01565 | 0.060809 | no          |
| ywnJ     | 4.33389                       | 3.1225                          | -0.47296             | -0.80957  | 0.2508  | 0.414558 | no          |
| yvlC     | 39.2773                       | 28.3363                         | -0.47105             | -0.85411  | 0.22375 | 0.389321 | no          |
| yugU     | 4.52957                       | 3.27194                         | -0.46923             | -0.77643  | 0.27105 | 0.435955 | no          |
| ybfG     | 2.49832                       | 1.80629                         | -0.46793             | -1.36949  | 0.0542  | 0.146019 | no          |
| ykfB     | 3.88582                       | 2.81036                         | -0.46747             | -0.95786  | 0.17245 | 0.328463 | no          |
| yoaW     | 2.40391                       | 1.73928                         | -0.4669              | -0.63521  | 0.37575 | 0.539914 | no          |
| ywmA     | 2.35253                       | 1.70306                         | -0.46608             | -0.66606  | 0.33185 | 0.499648 | no          |
| xtmB     | 2.35305                       | 1.70598                         | -0.46393             | -1.04981  | 0.139   | 0.284554 | no          |
| yhaH     | 32.1084                       | 23.2968                         | -0.46282             | -1.36648  | 0.05515 | 0.147832 | no          |
| ybgB     | 5.38252                       | 3.90704                         | -0.46221             | -0.56453  | 0.42605 | 0.587895 | no          |
| yeeC     | 4.45138                       | 3.23222                         | -0.46173             | -1.3111   | 0.0648  | 0.167681 | no          |
| yddQ     | 1.14868                       | 0.834205                        | -0.46151             | -0.52036  | 0.4557  | 0.61429  | no          |
| acpS     | 3.1786                        | 2.30841                         | -0.46149             | -0.59716  | 0.3908  | 0.552188 | no          |
| pksS     | 9.17145                       | 6.66611                         | -0.4603              | -1.60299  | 0.02555 | 0.086573 | no          |
| ytvB     | 2.64106                       | 1.92173                         | -0.45871             | -0.50452  | 0.4836  | 0.637853 | no          |
| yesJ     | 18.8766                       | 13.7431                         | -0.45789             | -1.44927  | 0.0437  | 0.128485 | no          |

| Table S3 | value_als<br>S High<br>sorted | value_als<br>S Normal<br>sorted | log2(fold<br>change) | test_stat | p_value | q_value  | significant |
|----------|-------------------------------|---------------------------------|----------------------|-----------|---------|----------|-------------|
| ydhU     | 0.404567                      | 0.294611                        | -0.45757             | 0         | 1       | 1        | no          |
| ykuJ     | 38.1952                       | 27.8661                         | -0.45488             | -1.03782  | 0.14205 | 0.289202 | no          |
| ccpB     | 1.67148                       | 1.22038                         | -0.4538              | -0.8614   | 0.22805 | 0.393684 | no          |
| trnI-Pro | 692.458                       | 505.697                         | -0.45345             | -0.64297  | 0.3512  | 0.517514 | no          |
| bscR     | 2.88609                       | 2.10971                         | -0.45207             | -0.81552  | 0.24665 | 0.410607 | no          |
| groEL    | 138.791                       | 101.461                         | -0.45199             | -1.69742  | 0.0176  | 0.066115 | no          |
| liaS     | 4.24669                       | 3.10473                         | -0.45187             | -0.99777  | 0.15195 | 0.301959 | no          |
| yrzH     | 21.6945                       | 15.8816                         | -0.44998             | -0.29216  | 0.65035 | 0.774424 | no          |
| ydfG     | 8.11309                       | 5.94153                         | -0.44942             | -1.00847  | 0.15725 | 0.310837 | no          |
| citS     | 4.97483                       | 3.64475                         | -0.44883             | -1.37154  | 0.0512  | 0.141197 | no          |
| ydhE     | 1.66332                       | 1.21914                         | -0.44821             | -0.94829  | 0.1803  | 0.33705  | no          |
| fruK     | 4.61416                       | 3.38255                         | -0.44796             | -1.028    | 0.14715 | 0.295249 | no          |
| yqkD     | 2.94095                       | 2.15678                         | -0.4474              | -1.03757  | 0.1465  | 0.294103 | no          |
| yaal     | 1.99896                       | 1.46625                         | -0.44712             | -0.66623  | 0.3402  | 0.508829 | no          |
| melA     | 1.62981                       | 1.19596                         | -0.44654             | -0.97551  | 0.16985 | 0.325575 | no          |
| yhfN     | 1.09258                       | 0.802112                        | -0.44587             | -0.83714  | 0.23995 | 0.404278 | no          |
| speA     | 3.2651                        | 2.40272                         | -0.44246             | -1.25664  | 0.0761  | 0.186823 | no          |
| yerA     | 5.2278                        | 3.84752                         | -0.44228             | -1.48931  | 0.0377  | 0.115671 | no          |
| ykkD     | 1.43697                       | 1.05865                         | -0.4408              | -0.27967  | 0.6914  | 0.80342  | no          |
| yqfX     | 0.486034                      | 0.35809                         | -0.44074             | 0         | 1       | 1        | no          |
| lytR     | 25.287                        | 18.6407                         | -0.43994             | -1.71577  | 0.0148  | 0.05848  | no          |
| yetN     | 1.69211                       | 1.24738                         | -0.43993             | -0.89554  | 0.2057  | 0.368032 | no          |
| trnB-Val | 2722.98                       | 2011.39                         | -0.437               | -1.05085  | 0.14035 | 0.286846 | no          |
| ygaC     | 19.3937                       | 14.328                          | -0.43675             | -1.38634  | 0.0519  | 0.142287 | no          |
| yrpG     | 0.720436                      | 0.532623                        | -0.43576             | -0.5848   | 0.40685 | 0.569617 | no          |
| yncC     | 0.576896                      | 0.426604                        | -0.43541             | -0.64123  | 0.35485 | 0.519758 | no          |
| mdxL     | 0.735725                      | 0.544292                        | -0.43479             | -0.63798  | 0.3716  | 0.535879 | no          |
| yclN     | 25.6214                       | 18.9666                         | -0.43389             | -0.98739  | 0.1592  | 0.313035 | no          |
| xkdV     | 3.70501                       | 2.74441                         | -0.43298             | -1.39545  | 0.04735 | 0.135899 | no          |
| tagA     | 17.9164                       | 13.2716                         | -0.43294             | -1.54836  | 0.02745 | 0.091927 | no          |
| ymcC     | 1.23471                       | 0.914832                        | -0.4326              | -0.52113  | 0.46205 | 0.619941 | no          |
| ydzT     | 32.1117                       | 23.8471                         | -0.42928             | -0.50316  | 0.47125 | 0.628421 | no          |
| rocC     | 2.06547                       | 1.5348                          | -0.42842             | -0.85727  | 0.2245  | 0.390081 | no          |
| thyB     | 8.04155                       | 5.9756                          | -0.42839             | -1.05713  | 0.13505 | 0.279378 | no          |
| yvnB     | 0.755346                      | 0.561363                        | -0.42821             | -1.08845  | 0.12115 | 0.25924  | no          |
| yvgK     | 12.3798                       | 9.2024                          | -0.42791             | -1.48719  | 0.03435 | 0.108147 | no          |
| yxdM     | 0.46447                       | 0.345282                        | -0.42781             | 0         | 1       | 1        | no          |
| proH     | 6.61406                       | 4.91797                         | -0.42748             | -0.9635   | 0.17145 | 0.3278   | no          |
| yfiQ     | 0.912257                      | 0.678407                        | -0.42729             | -0.68448  | 0.33105 | 0.499451 | no          |
| flgB     | 35.6918                       | 26.5434                         | -0.42724             | -1.03444  | 0.14095 | 0.287286 | no          |
| maa      | 3.53839                       | 2.63179                         | -0.42705             | -0.82049  | 0.2435  | 0.408092 | no          |
| mreD     | 37.25                         | 27.708                          | -0.42694             | -0.9039   | 0.19845 | 0.35954  | no          |
| ydhC     | 4.90337                       | 3.65166                         | -0.42522             | -1.01948  | 0.15345 | 0.304131 | no          |
| cycB     | 0.764547                      | 0.569386                        | -0.4252              | -0.67818  | 0.33855 | 0.507485 | no          |

| Table S3   | value_als<br>S High<br>sorted | value_als<br>S Normal<br>sorted | log2(fold<br>change) | test_stat | p_value | q_value  | significant |
|------------|-------------------------------|---------------------------------|----------------------|-----------|---------|----------|-------------|
| gerAB      | 1.2284                        | 0.915401                        | -0.4243              | -0.62164  | 0.3815  | 0.54475  | no          |
| trnSL-Glu1 | 617.55                        | 460.444                         | -0.42353             | -0.49272  | 0.4814  | 0.636591 | no          |
| sipV       | 8.27694                       | 6.17347                         | -0.42302             | -1.0472   | 0.14195 | 0.289166 | no          |
| acpK       | 12.1701                       | 9.08272                         | -0.42214             | -0.35565  | 0.60555 | 0.741293 | no          |
| yvzl       | 12.7709                       | 9.54792                         | -0.4196              | -0.50583  | 0.4653  | 0.622512 | no          |
| yojN       | 4.75949                       | 3.55912                         | -0.41929             | -1.13275  | 0.1098  | 0.240889 | no          |
| sbcD       | 5.82418                       | 4.35704                         | -0.41871             | -0.71662  | 0.29865 | 0.468948 | no          |
| ywbA       | 0.287962                      | 0.215842                        | -0.4159              | 0         | 1       | 1        | no          |
| ywbB       | 2.46822                       | 1.85036                         | -0.41566             | -0.777    | 0.25915 | 0.423383 | no          |
| ppsC       | 0.310505                      | 0.233097                        | -0.41369             | 0         | 1       | 1        | no          |
| yptA       | 23.0793                       | 17.3338                         | -0.41301             | -0.57436  | 0.4169  | 0.579347 | no          |
| yqaS       | 1.0164                        | 0.764008                        | -0.41181             | -0.44998  | 0.54605 | 0.692578 | no          |
| ymzD       | 14.5509                       | 10.9477                         | -0.41048             | -1.13659  | 0.11    | 0.240903 | no          |
| ybfH       | 3.10416                       | 2.33699                         | -0.40956             | -0.82208  | 0.25075 | 0.414558 | no          |
| yezA       | 19.3469                       | 14.5712                         | -0.40898             | -0.58351  | 0.3928  | 0.553618 | no          |
| yfkF       | 2.44759                       | 1.84487                         | -0.40785             | -0.98882  | 0.1595  | 0.313193 | no          |
| yisB       | 17.1862                       | 12.9567                         | -0.40755             | -0.89482  | 0.2066  | 0.368936 | no          |
| ispH       | 15.4174                       | 11.6309                         | -0.4066              | -1.49473  | 0.03405 | 0.107542 | no          |
| yozU       | 3.95263                       | 2.98321                         | -0.40595             | -0.26048  | 0.7217  | 0.828725 | no          |
| yefC       | 2.38348                       | 1.79959                         | -0.4054              | -0.34562  | 0.61885 | 0.749768 | no          |
| groES      | 459.385                       | 346.942                         | -0.40501             | -1.6337   | 0.02125 | 0.074575 | no          |
| xkdE       | 1.97204                       | 1.49016                         | -0.40423             | -0.99639  | 0.15965 | 0.313193 | no          |
| rpsR       | 832.235                       | 628.931                         | -0.40409             | -1.6324   | 0.021   | 0.074256 | no          |
| ybzH       | 22.3161                       | 16.8681                         | -0.40378             | -0.97257  | 0.16485 | 0.3196   | no          |
| dnaE       | 5.75286                       | 4.35139                         | -0.4028              | -1.57021  | 0.0281  | 0.093433 | no          |
| ypmR       | 7.36446                       | 5.57128                         | -0.40257             | -1.14977  | 0.1071  | 0.237055 | no          |
| katX       | 1.22474                       | 0.92692                         | -0.40196             | -0.87807  | 0.21825 | 0.383684 | no          |
| yngK       | 0.411793                      | 0.3117                          | -0.40176             | 0         | 1       | 1        | no          |
| ydeH       | 10.1816                       | 7.70896                         | -0.40135             | -0.99192  | 0.1578  | 0.311528 | no          |
| ydhH       | 3.91151                       | 2.96243                         | -0.40094             | -0.75409  | 0.2837  | 0.45155  | no          |
| gamP       | 5.84942                       | 4.43258                         | -0.40015             | -1.42608  | 0.04245 | 0.1258   | no          |
| fhuD       | 26.1561                       | 19.8241                         | -0.39989             | -1.56985  | 0.02645 | 0.088977 | no          |
| ylbC       | 5.23712                       | 3.96931                         | -0.39988             | -1.15832  | 0.10185 | 0.229378 | no          |
| rtbl       | 3.88285                       | 2.94727                         | -0.39774             | -1.2531   | 0.08045 | 0.194298 | no          |
| spsJ       | 0.6765                        | 0.513818                        | -0.39683             | -0.49505  | 0.4755  | 0.632082 | no          |
| yugO       | 0.41011                       | 0.31155                         | -0.39655             | 0         | 1       | 1        | no          |
| gcaD       | 49.4437                       | 37.6031                         | -0.39494             | -1.60049  | 0.0241  | 0.082711 | no          |
| yesM       | 0.298129                      | 0.226863                        | -0.39411             | 0         | 1       | 1        | no          |
| trnB-Asp   | 20062                         | 15269                           | -0.39386             | -1.48779  | 0.0332  | 0.105685 | no          |
| yczJ       | 56.5492                       | 43.0459                         | -0.39363             | -1.17834  | 0.0988  | 0.224244 | no          |
| rttN       | 14.9822                       | 11.4214                         | -0.39151             | -1.41314  | 0.04555 | 0.131746 | no          |
| tagB       | 8.21671                       | 6.27094                         | -0.38988             | -1.30494  | 0.0668  | 0.17096  | no          |
| malQ       | 1.44807                       | 1.10623                         | -0.38849             | -0.72353  | 0.29485 | 0.464348 | no          |
| ssbA       | 673.93                        | 514.882                         | -0.38836             | -1.43736  | 0.04115 | 0.122923 | no          |

| Table S3 | value_als<br>S High<br>sorted | value_als<br>S Normal<br>sorted | log2(fold<br>change) | test_stat | p_value | q_value  | significant |
|----------|-------------------------------|---------------------------------|----------------------|-----------|---------|----------|-------------|
| panE     | 7.20526                       | 5.50555                         | -0.38817             | -1.16544  | 0.09945 | 0.225468 | no          |
| abnB     | 0.763426                      | 0.583388                        | -0.38803             | -0.65684  | 0.3421  | 0.509574 | no          |
| glmS     | 29.979                        | 22.9285                         | -0.38681             | -1.564    | 0.02805 | 0.093433 | no          |
| acuB     | 2.41642                       | 1.84869                         | -0.38636             | -0.54376  | 0.43675 | 0.598687 | no          |
| yfmE     | 13.7204                       | 10.4981                         | -0.3862              | -1.16367  | 0.0954  | 0.21962  | no          |
| ydeN     | 7.60124                       | 5.81928                         | -0.38539             | -0.98908  | 0.1619  | 0.316014 | no          |
| yugH     | 36.1315                       | 27.6626                         | -0.38532             | -1.55006  | 0.0289  | 0.095583 | no          |
| ykyA     | 5.18464                       | 3.97021                         | -0.38503             | -0.94405  | 0.1851  | 0.343521 | no          |
| cggR     | 18.3557                       | 14.0616                         | -0.38446             | -1.47861  | 0.0375  | 0.115342 | no          |
| refZ     | 10.0232                       | 7.6816                          | -0.38387             | -0.91129  | 0.1966  | 0.357055 | no          |
| glnL     | 1.49315                       | 1.14461                         | -0.38351             | -0.70406  | 0.31365 | 0.482757 | no          |
| ykoP     | 0.348178                      | 0.267008                        | -0.38294             | 0         | 1       | 1        | no          |
| yphA     | 0.30616                       | 0.234791                        | -0.38291             | 0         | 1       | 1        | no          |
| yhcY     | 5.96893                       | 4.57996                         | -0.38214             | -0.94443  | 0.17575 | 0.332447 | no          |
| xkdS     | 12.05                         | 9.24835                         | -0.38177             | -0.70235  | 0.3227  | 0.491801 | no          |
| glsB     | 1.03985                       | 0.798309                        | -0.38136             | -0.59999  | 0.39365 | 0.554257 | no          |
| malP     | 0.387149                      | 0.297229                        | -0.38132             | 0         | 1       | 1        | no          |
| ydfD     | 0.687208                      | 0.527683                        | -0.38108             | -0.63251  | 0.37965 | 0.543772 | no          |
| yqiK     | 2.67637                       | 2.05589                         | -0.38052             | -0.77145  | 0.27795 | 0.444181 | no          |
| yobD     | 3.84703                       | 2.95659                         | -0.37981             | -0.5008   | 0.4807  | 0.636276 | no          |
| yveG     | 2.8203                        | 2.17279                         | -0.3763              | -0.34573  | 0.61805 | 0.74971  | no          |
| ntdC     | 1.96306                       | 1.51272                         | -0.37596             | -0.8115   | 0.24995 | 0.414235 | no          |
| tRNA-Ile | 3055.61                       | 2355.24                         | -0.37559             | -0.95577  | 0.16825 | 0.324005 | no          |
| fadF     | 0.499454                      | 0.38502                         | -0.37542             | 0         | 1       | 1        | no          |
| trnD-His | 5187.29                       | 4000.29                         | -0.37487             | -1.0691   | 0.12765 | 0.268532 | no          |
| ywhD     | 17.0115                       | 13.1321                         | -0.37341             | -1.14001  | 0.1117  | 0.243626 | no          |
| tagE     | 12.1937                       | 9.41508                         | -0.37309             | -1.06598  | 0.12755 | 0.268473 | no          |
| yyaH     | 5.66222                       | 4.37325                         | -0.37266             | -0.65995  | 0.35315 | 0.518954 | no          |
| bsuMA    | 11.1448                       | 8.60973                         | -0.37233             | -1.38258  | 0.04905 | 0.138333 | no          |
| yesV     | 0.204788                      | 0.158427                        | -0.37031             | 0         | 1       | 1        | no          |
| ygzB     | 55.9495                       | 43.3274                         | -0.36885             | -1.27382  | 0.07255 | 0.181205 | no          |
| ytrP     | 5.29169                       | 4.10155                         | -0.36756             | -1.24984  | 0.07685 | 0.187923 | no          |
| spoOE    | 54.5436                       | 42.2804                         | -0.36742             | -1.01772  | 0.15085 | 0.300894 | no          |
| phoP     | 10.7903                       | 8.37083                         | -0.36629             | -0.82422  | 0.2381  | 0.403275 | no          |
| des      | 2.76661                       | 2.14651                         | -0.36612             | -0.89255  | 0.2019  | 0.363498 | no          |
| xkdf     | 6.37337                       | 4.94941                         | -0.3648              | -1.03145  | 0.14455 | 0.292116 | no          |
| yqaO     | 53.441                        | 41.5134                         | -0.36437             | -0.79748  | 0.26585 | 0.429919 | no          |
| trnB-Phe | 341.91                        | 265.622                         | -0.36424             | -0.36888  | 0.5986  | 0.736469 | no          |
| rppG     | 3.8147                        | 2.96392                         | -0.36406             | -0.65468  | 0.3461  | 0.513852 | no          |
| pksF     | 5.58955                       | 4.34337                         | -0.36392             | -1.07992  | 0.1281  | 0.268978 | no          |
| yvdR     | 0.935764                      | 0.727183                        | -0.36383             | -0.16406  | 0.79935 | 0.88011  | no          |
| abnA     | 0.146903                      | 0.114187                        | -0.36346             | 0         | 1       | 1        | no          |
| yodD     | 5.29591                       | 4.11926                         | -0.3625              | -0.84931  | 0.2308  | 0.396233 | no          |
| yyaE     | 4.456                         | 3.46707                         | -0.36203             | -1.23019  | 0.0807  | 0.194529 | no          |

| Table S3 | value_als<br>S High<br>sorted | value_als<br>S Normal<br>sorted | log2(fold<br>change) | test_stat | p_value | q_value  | significant |
|----------|-------------------------------|---------------------------------|----------------------|-----------|---------|----------|-------------|
| ydeI     | 2.69768                       | 2.09979                         | -0.36148             | -0.65566  | 0.36155 | 0.526121 | no          |
| fruR     | 4.57098                       | 3.55908                         | -0.361               | -0.72551  | 0.30605 | 0.475646 | no          |
| yhzF     | 8.31351                       | 6.47391                         | -0.36082             | -0.30721  | 0.67225 | 0.791356 | no          |
| cotS     | 0.326025                      | 0.254162                        | -0.35923             | 0         | 1       | 1        | no          |
| tetB     | 7.10087                       | 5.53724                         | -0.35883             | -1.22839  | 0.08395 | 0.200942 | no          |
| nfo      | 20.5275                       | 16.0106                         | -0.35853             | -1.37111  | 0.0528  | 0.143909 | no          |
| yisP     | 2.09512                       | 1.63425                         | -0.3584              | -0.70719  | 0.32245 | 0.491801 | no          |
| yhjN     | 3.72491                       | 2.90623                         | -0.35806             | -0.98645  | 0.16345 | 0.318042 | no          |
| yvID     | 46.2683                       | 36.1024                         | -0.35793             | -1.18815  | 0.092   | 0.214303 | no          |
| xkdT     | 5.03005                       | 3.9281                          | -0.35674             | -0.84374  | 0.2307  | 0.396233 | no          |
| cotA     | 0.684959                      | 0.535168                        | -0.35602             | -0.60727  | 0.38975 | 0.551543 | no          |
| gerM     | 0.295181                      | 0.230757                        | -0.35523             | 0         | 1       | 1        | no          |
| cwkK     | 3.92019                       | 3.06722                         | -0.35399             | -0.66704  | 0.34675 | 0.514352 | no          |
| yrkF     | 0.281178                      | 0.220067                        | -0.35354             | 0         | 1       | 1        | no          |
| gerKC    | 0.536327                      | 0.420737                        | -0.3502              | -0.46206  | 0.50225 | 0.653678 | no          |
| liaF     | 5.00717                       | 3.92805                         | -0.35018             | -0.67278  | 0.34205 | 0.509574 | no          |
| yqgQ     | 32.1376                       | 25.2126                         | -0.35011             | -0.673    | 0.3478  | 0.515165 | no          |
| yoZG     | 4.74607                       | 3.72367                         | -0.35001             | -0.35406  | 0.6133  | 0.747409 | no          |
| cypX     | 6.84646                       | 5.37351                         | -0.34949             | -1.14642  | 0.1035  | 0.231557 | no          |
| spolISA  | 7.70424                       | 6.04814                         | -0.34916             | -0.91662  | 0.1957  | 0.35646  | no          |
| frlR     | 6.36574                       | 5.0008                          | -0.34817             | -0.94496  | 0.18    | 0.336902 | no          |
| yloB     | 0.955825                      | 0.751034                        | -0.34787             | -0.84733  | 0.23555 | 0.401435 | no          |
| ycgT     | 20.2252                       | 15.8922                         | -0.34784             | -1.34973  | 0.05185 | 0.142254 | no          |
| srtN     | 4.9532                        | 3.89649                         | -0.34619             | -0.88225  | 0.21285 | 0.377389 | no          |
| yetI     | 14.9102                       | 11.7311                         | -0.34597             | -0.63365  | 0.3758  | 0.539914 | no          |
| yisR     | 2.16224                       | 1.7019                          | -0.34538             | -0.70744  | 0.32395 | 0.492797 | no          |
| ydeJ     | 6.18514                       | 4.86939                         | -0.34507             | -0.89587  | 0.21085 | 0.37509  | no          |
| yqfT     | 9.01986                       | 7.10457                         | -0.34436             | -0.48095  | 0.48995 | 0.64402  | no          |
| cdd      | 43.5134                       | 34.2851                         | -0.34388             | -0.6948   | 0.3312  | 0.499475 | no          |
| lysP     | 7.09767                       | 5.59394                         | -0.34348             | -1.18851  | 0.0953  | 0.21962  | no          |
| cshB     | 9.82393                       | 7.74623                         | -0.34281             | -1.25659  | 0.07115 | 0.178664 | no          |
| trnB-His | 2959.89                       | 2336.2                          | -0.34138             | -0.82749  | 0.2417  | 0.406352 | no          |
| liaI     | 12.8549                       | 10.1508                         | -0.34072             | -0.82099  | 0.24465 | 0.408735 | no          |
| yhaA     | 14.4584                       | 11.4197                         | -0.34038             | -1.30339  | 0.06805 | 0.173328 | no          |
| ksgA     | 4.68491                       | 3.70381                         | -0.33901             | -0.65606  | 0.35245 | 0.518333 | no          |
| thrZ     | 1.06272                       | 0.840237                        | -0.33889             | -0.7533   | 0.29155 | 0.460901 | no          |
| mcsA     | 9.8656                        | 7.80546                         | -0.33792             | -0.28871  | 0.68155 | 0.796778 | no          |
| lytT     | 4.80788                       | 3.80492                         | -0.33754             | -0.63008  | 0.3665  | 0.531533 | no          |
| dusC     | 7.57422                       | 5.99829                         | -0.33655             | -1.05538  | 0.1358  | 0.279998 | no          |
| yKzU     | 6.3707                        | 5.04666                         | -0.33612             | -0.77124  | 0.2703  | 0.435231 | no          |
| xhIB     | 39.0945                       | 30.9715                         | -0.33602             | -0.86661  | 0.22005 | 0.385216 | no          |
| pksA     | 7.29117                       | 5.78091                         | -0.33485             | -0.87974  | 0.2111  | 0.375354 | no          |
| yqeI     | 45.9539                       | 36.4483                         | -0.33434             | -0.64184  | 0.3668  | 0.531689 | no          |
| copZ     | 19.9417                       | 15.8304                         | -0.33309             | -0.50925  | 0.475   | 0.631642 | no          |

| Table S3 | value_als<br>S High<br>sorted | value_als<br>S Normal<br>sorted | log2(fold<br>change) | test_stat | p_value | q_value  | significant |
|----------|-------------------------------|---------------------------------|----------------------|-----------|---------|----------|-------------|
| yknW     | 230.83                        | 183.246                         | -0.33304             | -1.32879  | 0.05965 | 0.156965 | no          |
| swrAA    | 22.1378                       | 17.5815                         | -0.33245             | -0.80349  | 0.24955 | 0.413774 | no          |
| ytdA     | 0.232704                      | 0.184827                        | -0.33232             | 0         | 1       | 1        | no          |
| ywkD     | 3.73934                       | 2.9703                          | -0.33218             | -0.50793  | 0.477   | 0.632949 | no          |
| ylxW     | 7.7689                        | 6.17217                         | -0.33193             | -0.7362   | 0.2982  | 0.468439 | no          |
| yxjF     | 1.11818                       | 0.888781                        | -0.33125             | -0.48667  | 0.4779  | 0.633693 | no          |
| yodL     | 4.79266                       | 3.81218                         | -0.33021             | -0.44985  | 0.5155  | 0.666075 | no          |
| fbpA     | 81.6154                       | 64.9322                         | -0.32991             | -0.55818  | 0.42925 | 0.59101  | no          |
| yneR     | 9.7995                        | 7.80026                         | -0.32919             | -0.55663  | 0.4332  | 0.595351 | no          |
| yuzM     | 1.58744                       | 1.26483                         | -0.32775             | -0.17932  | 0.78405 | 0.871063 | no          |
| pbpD     | 9.38868                       | 7.48687                         | -0.32656             | -1.2646   | 0.07115 | 0.178664 | no          |
| ypcP     | 6.77548                       | 5.40397                         | -0.3263              | -0.96582  | 0.17185 | 0.328061 | no          |
| yjcK     | 6.85717                       | 5.4732                          | -0.32523             | -0.79562  | 0.2641  | 0.429134 | no          |
| ywqH     | 30.5743                       | 24.433                          | -0.32349             | -1.05166  | 0.13375 | 0.277303 | no          |
| ykzI     | 13.065                        | 10.4454                         | -0.32285             | -0.33427  | 0.61735 | 0.74971  | no          |
| holB     | 13.8908                       | 11.1132                         | -0.32186             | -1.18196  | 0.0953  | 0.21962  | no          |
| rttO     | 20.1765                       | 16.1439                         | -0.32169             | -0.53153  | 0.4563  | 0.614568 | no          |
| trnI-Arg | 214.332                       | 171.587                         | -0.32091             | -0.25065  | 0.73055 | 0.835234 | no          |
| yfjB     | 1.74095                       | 1.39394                         | -0.32071             | -0.70952  | 0.3207  | 0.490173 | no          |
| ywnF     | 3.8305                        | 3.06777                         | -0.32034             | -0.54339  | 0.4457  | 0.606503 | no          |
| ywzG     | 13.4656                       | 10.792                          | -0.31931             | -0.54905  | 0.4352  | 0.59722  | no          |
| rghRA    | 8.51633                       | 6.82587                         | -0.31922             | -0.70572  | 0.31995 | 0.489428 | no          |
| ycbO     | 1.86614                       | 1.49588                         | -0.31906             | -0.54845  | 0.4428  | 0.604098 | no          |
| iolC     | 0.997934                      | 0.800218                        | -0.31855             | -0.51526  | 0.4745  | 0.631268 | no          |
| swrAA    | 256.38                        | 205.709                         | -0.31767             | -0.45168  | 0.528   | 0.677277 | no          |
| yfnB     | 8.58208                       | 6.88676                         | -0.3175              | -0.92039  | 0.1955  | 0.35627  | no          |
| xkdO     | 2.69996                       | 2.16729                         | -0.31705             | -1.09148  | 0.11585 | 0.250483 | no          |
| aroH     | 7.26674                       | 5.8338                          | -0.31687             | -0.22141  | 0.755   | 0.852743 | no          |
| yoyB     | 12.6661                       | 10.1735                         | -0.31616             | -0.37643  | 0.59405 | 0.733041 | no          |
| foIEB    | 0.280686                      | 0.225452                        | -0.31614             | 0         | 1       | 1        | no          |
| yhcH     | 7.87493                       | 6.32658                         | -0.31584             | -0.71874  | 0.30985 | 0.47949  | no          |
| padC     | 1.18018                       | 0.948538                        | -0.31523             | -0.34516  | 0.6419  | 0.766748 | no          |
| yjkA     | 1.20819                       | 0.972595                        | -0.31294             | -0.33211  | 0.62375 | 0.753442 | no          |
| ypgQ     | 10.3771                       | 8.35738                         | -0.31228             | -0.90862  | 0.2044  | 0.366323 | no          |
| cypA     | 0.375521                      | 0.30249                         | -0.31201             | 0         | 1       | 1        | no          |
| yitB     | 0.418881                      | 0.337464                        | -0.31181             | 0         | 1       | 1        | no          |
| glnJ     | 0.949372                      | 0.764859                        | -0.31178             | -0.55023  | 0.43865 | 0.600176 | no          |
| ytID     | 0.462862                      | 0.373285                        | -0.31031             | 0         | 1       | 1        | no          |
| yaaR     | 24.1535                       | 19.4806                         | -0.31019             | -0.97037  | 0.17445 | 0.330826 | no          |
| dctB     | 2.66343                       | 2.14884                         | -0.30973             | -0.74528  | 0.2893  | 0.458314 | no          |
| sigL     | 11.0931                       | 8.95492                         | -0.30891             | -1.15873  | 0.09965 | 0.225785 | no          |
| ypjP     | 35.9389                       | 29.0219                         | -0.3084              | -1.18236  | 0.09295 | 0.215977 | no          |
| yceF     | 67.8818                       | 54.8279                         | -0.30812             | -1.24206  | 0.07685 | 0.187923 | no          |
| mprF     | 12.287                        | 9.92464                         | -0.30805             | -1.23327  | 0.07545 | 0.185961 | no          |



| Table S3 | value_als<br>S High<br>sorted | value_als<br>S Normal<br>sorted | log2(fold<br>change) | test_stat | p_value | q_value  | significant |
|----------|-------------------------------|---------------------------------|----------------------|-----------|---------|----------|-------------|
| yqhP     | 8.0987                        | 6.54504                         | -0.30729             | -0.63216  | 0.3694  | 0.534214 | no          |
| yxkB     | 5.08427                       | 4.10998                         | -0.30691             | -0.88943  | 0.20895 | 0.372065 | no          |
| khtT     | 3.11744                       | 2.52126                         | -0.30622             | -0.52698  | 0.4544  | 0.613867 | no          |
| yrdP     | 0.712934                      | 0.576823                        | -0.30564             | -0.42879  | 0.5227  | 0.672094 | no          |
| yfmM     | 5.3452                        | 4.33315                         | -0.30283             | -1.00815  | 0.15645 | 0.30942  | no          |
| pelB     | 3.36691                       | 2.72965                         | -0.30271             | -0.78491  | 0.26555 | 0.429807 | no          |
| citT     | 2.33465                       | 1.89328                         | -0.30231             | -0.32955  | 0.63375 | 0.760663 | no          |
| yqhO     | 0.464767                      | 0.37712                         | -0.30148             | 0         | 1       | 1        | no          |
| yrkP     | 2.06995                       | 1.68004                         | -0.3011              | -0.49318  | 0.4812  | 0.636591 | no          |
| yrdA     | 8.08534                       | 6.56253                         | -0.30106             | -0.74504  | 0.29125 | 0.460896 | no          |
| yuiD     | 1.99445                       | 1.61933                         | -0.3006              | -0.40952  | 0.5551  | 0.699542 | no          |
| yjaV     | 0.342306                      | 0.277964                        | -0.30039             | 0         | 1       | 1        | no          |
| xkdC     | 0.403617                      | 0.327992                        | -0.29932             | 0         | 1       | 1        | no          |
| yIbM     | 2.12518                       | 1.72714                         | -0.29921             | -0.69416  | 0.32205 | 0.491801 | no          |
| yhdl     | 1.318                         | 1.07239                         | -0.29752             | -0.63523  | 0.36925 | 0.534204 | no          |
| ywhC     | 26.0421                       | 21.1938                         | -0.2972              | -1.10266  | 0.1132  | 0.246322 | no          |
| ypeP     | 2.64353                       | 2.15143                         | -0.29717             | -0.53791  | 0.4515  | 0.611788 | no          |
| yhcU     | 1.50314                       | 1.22536                         | -0.29478             | -0.29169  | 0.6673  | 0.787018 | no          |
| mleA     | 4.44352                       | 3.62256                         | -0.2947              | -0.88554  | 0.2122  | 0.376416 | no          |
| yueG     | 23.5258                       | 19.2008                         | -0.29308             | -0.5211   | 0.45705 | 0.614778 | no          |
| tdh      | 0.883525                      | 0.721206                        | -0.29286             | -0.45953  | 0.5097  | 0.66107  | no          |
| arsC     | 3.81441                       | 3.11495                         | -0.29225             | -0.48405  | 0.4908  | 0.644164 | no          |
| ywch     | 1.99035                       | 1.62631                         | -0.29142             | -0.62408  | 0.37995 | 0.543934 | no          |
| yqxK     | 9.3201                        | 7.61598                         | -0.29132             | -0.91485  | 0.1921  | 0.352136 | no          |
| ysmB     | 17.487                        | 14.2928                         | -0.291               | -0.83943  | 0.2382  | 0.403275 | no          |
| yvrL     | 1.72883                       | 1.414                           | -0.29001             | -0.32259  | 0.6375  | 0.763936 | no          |
| yfhC     | 52.5178                       | 42.9633                         | -0.2897              | -1.14122  | 0.10215 | 0.229914 | no          |
| ysfB     | 1.00948                       | 0.825834                        | -0.28969             | -0.4969   | 0.4796  | 0.63527  | no          |
| ywzH     | 1416.4                        | 1159.91                         | -0.28822             | -1.11498  | 0.10685 | 0.236923 | no          |
| cotT     | 2.33025                       | 1.90863                         | -0.28795             | -0.24193  | 0.78765 | 0.874449 | no          |
| yqzK     | 52.2986                       | 42.8433                         | -0.2877              | -0.70943  | 0.31775 | 0.486737 | no          |
| ygbX     | 0.746384                      | 0.611904                        | -0.28661             | -0.53277  | 0.4531  | 0.612776 | no          |
| ureA     | 12.6389                       | 10.3646                         | -0.28621             | -0.39036  | 0.5806  | 0.721451 | no          |
| yraH     | 2.93975                       | 2.41344                         | -0.28461             | -0.38561  | 0.58045 | 0.721451 | no          |
| rplM     | 797.496                       | 655.223                         | -0.28349             | -1.06552  | 0.1267  | 0.267589 | no          |
| tagG     | 15.1238                       | 12.4423                         | -0.28156             | -1.00173  | 0.1548  | 0.306481 | no          |
| yhaO     | 5.16512                       | 4.25146                         | -0.28084             | -0.86078  | 0.2293  | 0.395294 | no          |
| ybfJ     | 6.6943                        | 5.51131                         | -0.28054             | -0.34343  | 0.6356  | 0.762393 | no          |
| ywsA     | 7.43202                       | 6.12227                         | -0.27969             | -0.44086  | 0.5356  | 0.684567 | no          |
| ykwD     | 1.74953                       | 1.44125                         | -0.27965             | -0.50392  | 0.4773  | 0.633122 | no          |
| yppB     | 4.81745                       | 3.97568                         | -0.27707             | -0.54982  | 0.4269  | 0.588208 | no          |
| yurS     | 2.09875                       | 1.73275                         | -0.27646             | -0.19339  | 0.7769  | 0.865974 | no          |
| mdxR     | 0.151023                      | 0.124735                        | -0.2759              | 0         | 1       | 1        | no          |
| cymR     | 34.9495                       | 28.8676                         | -0.27582             | -0.92773  | 0.18965 | 0.348936 | no          |

| Table S3 | value_als<br>S High<br>sorted | value_als<br>S Normal<br>sorted | log2(fold<br>change) | test_stat | p_value | q_value  | significant |
|----------|-------------------------------|---------------------------------|----------------------|-----------|---------|----------|-------------|
| ypmS     | 10.4232                       | 8.61024                         | -0.27567             | -0.77455  | 0.2688  | 0.433725 | no          |
| ydfA     | 2.71395                       | 2.24205                         | -0.27558             | -0.72939  | 0.3024  | 0.47265  | no          |
| ydaS     | 19.3792                       | 16.0158                         | -0.27502             | -0.54347  | 0.44945 | 0.609828 | no          |
| nhaX     | 11.5002                       | 9.50589                         | -0.27477             | -0.75658  | 0.27845 | 0.44471  | no          |
| sqhC     | 0.402428                      | 0.332694                        | -0.27454             | 0         | 1       | 1        | no          |
| rpmA     | 1769.3                        | 1463.38                         | -0.27387             | -1.05776  | 0.1269  | 0.267814 | no          |
| nupG     | 7.31915                       | 6.05477                         | -0.2736              | -0.91037  | 0.19585 | 0.35656  | no          |
| ykoJ     | 7.30554                       | 6.04562                         | -0.2731              | -0.66134  | 0.3503  | 0.517169 | no          |
| yusG     | 89.0404                       | 73.6891                         | -0.27301             | -0.67754  | 0.33175 | 0.499648 | no          |
| glpP     | 20.3397                       | 16.837                          | -0.27267             | -0.92465  | 0.1925  | 0.352696 | no          |
| ybfQ     | 23.8572                       | 19.7559                         | -0.27214             | -1.06651  | 0.12465 | 0.26521  | no          |
| yclE     | 1.70925                       | 1.41661                         | -0.27092             | -0.5062   | 0.47215 | 0.629196 | no          |
| abbA     | 219.877                       | 182.309                         | -0.27031             | -0.86795  | 0.22425 | 0.389828 | no          |
| yuxL     | 3.06108                       | 2.53811                         | -0.27029             | -0.8363   | 0.23525 | 0.401435 | no          |
| yjdF     | 6.80045                       | 5.64449                         | -0.26879             | -0.6113   | 0.3899  | 0.551543 | no          |
| glgA     | 0.673513                      | 0.559161                        | -0.26844             | -0.37232  | 0.5965  | 0.735093 | no          |
| yjgA     | 3.60139                       | 2.99259                         | -0.26716             | -0.40853  | 0.54955 | 0.6956   | no          |
| sfp      | 7.42603                       | 6.17097                         | -0.26709             | -0.64202  | 0.35885 | 0.523621 | no          |
| yodJ     | 9.86667                       | 8.20178                         | -0.26663             | -0.85126  | 0.2298  | 0.395663 | no          |
| yeaD     | 8.88855                       | 7.39782                         | -0.26485             | -0.83286  | 0.237   | 0.40279  | no          |
| ycbC     | 0.216031                      | 0.180053                        | -0.26282             | 0         | 1       | 1        | no          |
| yueH     | 19.969                        | 16.6486                         | -0.26236             | -0.50678  | 0.4761  | 0.632536 | no          |
| yxjH     | 29.5094                       | 24.6036                         | -0.2623              | -1.05014  | 0.1341  | 0.277874 | no          |
| trnS-Glu | 513.446                       | 428.518                         | -0.26086             | -0.29314  | 0.6959  | 0.807235 | no          |
| yphB     | 0.905347                      | 0.756443                        | -0.25924             | -0.37015  | 0.60035 | 0.737284 | no          |
| bcaP     | 15.2799                       | 12.7671                         | -0.2592              | -1.01831  | 0.1514  | 0.301669 | no          |
| yitS     | 6.49273                       | 5.4282                          | -0.25835             | -0.75028  | 0.2913  | 0.460896 | no          |
| msmX     | 2.70926                       | 2.26617                         | -0.25764             | -0.63799  | 0.36315 | 0.528244 | no          |
| ganA     | 0.698498                      | 0.584289                        | -0.25757             | -0.51408  | 0.4683  | 0.625181 | no          |
| yhdV     | 10.8133                       | 9.0458                          | -0.25749             | -0.42431  | 0.54425 | 0.691235 | no          |
| kamA     | 0.40848                       | 0.341745                        | -0.25735             | 0         | 1       | 1        | no          |
| ywql     | 21.7673                       | 18.2125                         | -0.25723             | -0.53577  | 0.45235 | 0.612051 | no          |
| yzkL     | 12.0235                       | 10.0604                         | -0.25717             | -0.43195  | 0.53485 | 0.683949 | no          |
| yqaG     | 0.236532                      | 0.197933                        | -0.25702             | 0         | 1       | 1        | no          |
| phoR     | 6.62951                       | 5.55119                         | -0.2561              | -0.79478  | 0.25415 | 0.417141 | no          |
| yIbF     | 34.2475                       | 28.6833                         | -0.25579             | -0.89256  | 0.2049  | 0.366953 | no          |
| trnY-Asp | 18940.9                       | 15867.1                         | -0.25547             | -0.96758  | 0.17415 | 0.330593 | no          |
| ydfF     | 5.94111                       | 4.97997                         | -0.2546              | -0.66543  | 0.34765 | 0.515165 | no          |
| rluB     | 9.95129                       | 8.34485                         | -0.254               | -0.78008  | 0.26875 | 0.433725 | no          |
| ycnB     | 2.82735                       | 2.3716                          | -0.25359             | -0.69799  | 0.3198  | 0.489399 | no          |
| glgP     | 0.634125                      | 0.531955                        | -0.25346             | -0.45843  | 0.5157  | 0.666075 | no          |
| pucl     | 0.301184                      | 0.252918                        | -0.25198             | 0         | 1       | 1        | no          |
| ypkP     | 5.276                         | 4.43075                         | -0.25189             | -0.60959  | 0.39265 | 0.553618 | no          |
| ydjB     | 6.08749                       | 5.11451                         | -0.25125             | -0.41757  | 0.5565  | 0.70107  | no          |

| Table S3 | value_als<br>S High<br>sorted | value_als<br>S Normal<br>sorted | log2(fold<br>change) | test_stat | p_value | q_value  | significant |
|----------|-------------------------------|---------------------------------|----------------------|-----------|---------|----------|-------------|
| malR     | 2.66627                       | 2.24043                         | -0.25105             | -0.52937  | 0.4524  | 0.612051 | no          |
| xylB     | 0.469189                      | 0.394754                        | -0.24921             | 0         | 1       | 1        | no          |
| yyzJ     | 24.4309                       | 20.5584                         | -0.24898             | -0.27146  | 0.6823  | 0.797405 | no          |
| xkdG     | 4.90184                       | 4.12735                         | -0.24811             | -0.69304  | 0.3254  | 0.493319 | no          |
| iolH     | 0.957426                      | 0.806239                        | -0.24795             | -0.36597  | 0.59515 | 0.733671 | no          |
| ansA     | 2.9482                        | 2.48278                         | -0.24788             | -0.60826  | 0.3929  | 0.553618 | no          |
| yticQ    | 0.251932                      | 0.212161                        | -0.24788             | 0         | 1       | 1        | no          |
| speD     | 66.972                        | 56.4299                         | -0.2471              | -0.92757  | 0.18435 | 0.342469 | no          |
| yoaG     | 19.3639                       | 16.331                          | -0.24576             | -0.70301  | 0.31735 | 0.486447 | no          |
| yjcH     | 47.4037                       | 39.9951                         | -0.24518             | -0.97855  | 0.16005 | 0.313386 | no          |
| ldh      | 79.7851                       | 67.3499                         | -0.24444             | -0.99086  | 0.1603  | 0.313711 | no          |
| csoR     | 17.5216                       | 14.7973                         | -0.2438              | -0.55069  | 0.43765 | 0.599481 | no          |
| yvgL     | 1.70744                       | 1.44251                         | -0.24326             | -0.35987  | 0.618   | 0.74971  | no          |
| aseR     | 2.99515                       | 2.53171                         | -0.24251             | -0.28966  | 0.6759  | 0.794151 | no          |
| spolIE   | 0.672845                      | 0.568866                        | -0.24219             | -0.51381  | 0.46465 | 0.622088 | no          |
| sacT     | 2.35873                       | 1.9943                          | -0.24213             | -0.5063   | 0.46815 | 0.625181 | no          |
| yclI     | 0.10711                       | 0.090565                        | -0.24208             | 0         | 1       | 1        | no          |
| yrpB     | 4.29361                       | 3.63204                         | -0.24141             | -0.675    | 0.34315 | 0.510284 | no          |
| yoaT     | 1.41607                       | 1.19789                         | -0.24141             | -0.40546  | 0.5612  | 0.705325 | no          |
| albE     | 3.17087                       | 2.6832                          | -0.24093             | -0.44042  | 0.53275 | 0.682432 | no          |
| yshA     | 11.3275                       | 9.58838                         | -0.24047             | -0.38271  | 0.58955 | 0.728692 | no          |
| yjbK     | 4.70391                       | 3.98191                         | -0.2404              | -0.53603  | 0.4534  | 0.61296  | no          |
| bacD     | 18.1295                       | 15.353                          | -0.23981             | -0.72624  | 0.29755 | 0.468008 | no          |
| yrrT     | 7.69431                       | 6.51751                         | -0.23947             | -0.65143  | 0.34965 | 0.516862 | no          |
| ywdJ     | 7.06658                       | 5.98657                         | -0.23928             | -0.82142  | 0.249   | 0.413046 | no          |
| pbpH     | 8.9519                        | 7.58511                         | -0.23902             | -0.93495  | 0.1854  | 0.343906 | no          |
| yebA     | 4.74536                       | 4.02134                         | -0.23884             | -0.85728  | 0.22575 | 0.391342 | no          |
| asnB     | 17.8556                       | 15.1327                         | -0.23871             | -0.95779  | 0.1722  | 0.328226 | no          |
| yoaP     | 0.596897                      | 0.505963                        | -0.23845             | -0.25437  | 0.72335 | 0.830052 | no          |
| ytzB     | 27.1938                       | 23.0548                         | -0.23821             | -0.64038  | 0.35875 | 0.523621 | no          |
| sacC     | 0.724176                      | 0.614112                        | -0.23784             | -0.48171  | 0.49505 | 0.647663 | no          |
| yxjM     | 1.98514                       | 1.68388                         | -0.23745             | -0.52209  | 0.45535 | 0.61429  | no          |
| trnE-Asp | 7600.54                       | 6453.77                         | -0.23596             | -0.76166  | 0.27325 | 0.43828  | no          |
| yfiS     | 0.744328                      | 0.632074                        | -0.23585             | -0.25907  | 0.69805 | 0.808724 | no          |
| yybI     | 2.00871                       | 1.70639                         | -0.23532             | -0.45712  | 0.51085 | 0.661872 | no          |
| yjzF     | 40.9394                       | 34.7784                         | -0.2353              | -0.2282   | 0.73985 | 0.842256 | no          |
| yteU     | 0.391344                      | 0.332477                        | -0.23518             | 0         | 1       | 1        | no          |
| yhcl     | 13.9043                       | 11.8174                         | -0.23462             | -0.73314  | 0.29405 | 0.463558 | no          |
| yvfl     | 7.63878                       | 6.49259                         | -0.23455             | -0.65105  | 0.35715 | 0.521956 | no          |
| pabC     | 9.82751                       | 8.35669                         | -0.2339              | -0.34255  | 0.6213  | 0.752005 | no          |
| glpT     | 0.437703                      | 0.372273                        | -0.23359             | 0         | 1       | 1        | no          |
| panB     | 26.9794                       | 22.9511                         | -0.2333              | -0.91094  | 0.1944  | 0.354958 | no          |
| yclM     | 20.1796                       | 17.1681                         | -0.23317             | -0.92905  | 0.184   | 0.342159 | no          |
| ylqH     | 10.6383                       | 9.05098                         | -0.23313             | -0.24957  | 0.71815 | 0.825861 | no          |

| Table S3 | value_als<br>S High<br>sorted | value_als<br>S Normal<br>sorted | log2(fold<br>change) | test_stat | p_value | q_value  | significant |
|----------|-------------------------------|---------------------------------|----------------------|-----------|---------|----------|-------------|
| pabA     | 22.4185                       | 19.0739                         | -0.23309             | -0.39107  | 0.57825 | 0.719968 | no          |
| ydjE     | 42.1794                       | 35.9396                         | -0.23097             | -0.92787  | 0.18575 | 0.344214 | no          |
| yjbH     | 10.9577                       | 9.33791                         | -0.23078             | -0.71101  | 0.31035 | 0.47949  | no          |
| ydgK     | 3.25729                       | 2.77757                         | -0.22985             | -0.62672  | 0.37875 | 0.542691 | no          |
| sepF     | 40.5496                       | 34.591                          | -0.22929             | -0.51818  | 0.46095 | 0.618909 | no          |
| dgkA     | 8.9494                        | 7.63768                         | -0.22866             | -0.27452  | 0.66435 | 0.784778 | no          |
| zinT     | 0.385898                      | 0.32961                         | -0.22746             | 0         | 1       | 1        | no          |
| yezC     | 1.89726                       | 1.6206                          | -0.22739             | -0.27896  | 0.69095 | 0.80342  | no          |
| liaR     | 4.11094                       | 3.51453                         | -0.22614             | -0.35482  | 0.61305 | 0.747349 | no          |
| ybyB     | 50.9955                       | 43.6521                         | -0.22432             | -0.6228   | 0.3768  | 0.540727 | no          |
| rhaA     | 0.547324                      | 0.468597                        | -0.22405             | -0.32448  | 0.6297  | 0.757506 | no          |
| pbpF     | 2.0954                        | 1.79437                         | -0.22375             | -0.64401  | 0.3714  | 0.535861 | no          |
| yqzH     | 6.98073                       | 5.97842                         | -0.22361             | -0.19599  | 0.7586  | 0.854878 | no          |
| yokH     | 1.69928                       | 1.4553                          | -0.2236              | -0.32123  | 0.6328  | 0.760256 | no          |
| ypzJ     | 30.0026                       | 25.6969                         | -0.22349             | -0.38016  | 0.5893  | 0.728625 | no          |
| ypqA     | 0.419356                      | 0.359471                        | -0.2223              | 0         | 1       | 1        | no          |
| yhdF     | 3.58222                       | 3.07491                         | -0.22031             | -0.54691  | 0.43225 | 0.594483 | no          |
| phrE     | 139.483                       | 119.754                         | -0.22002             | -0.30463  | 0.6704  | 0.789427 | no          |
| spsG     | 0.303152                      | 0.260337                        | -0.21966             | 0         | 1       | 1        | no          |
| ycnL     | 7.36103                       | 6.32341                         | -0.21921             | -0.41841  | 0.55175 | 0.697675 | no          |
| ymcA     | 14.84                         | 12.7545                         | -0.21848             | -0.60394  | 0.3888  | 0.551102 | no          |
| ydfE     | 1.29931                       | 1.11688                         | -0.21827             | -0.30672  | 0.66985 | 0.789028 | no          |
| yobE     | 7.57229                       | 6.5105                          | -0.21796             | -0.6054   | 0.38965 | 0.551543 | no          |
| ytzJ     | 191.535                       | 164.73                          | -0.21751             | -0.65921  | 0.34625 | 0.51387  | no          |
| yvcl     | 26.7823                       | 23.0516                         | -0.21641             | -0.72743  | 0.30235 | 0.47265  | no          |
| yfhF     | 3.87884                       | 3.34                            | -0.21578             | -0.56006  | 0.42615 | 0.587895 | no          |
| gntK     | 4.05785                       | 3.49591                         | -0.21505             | -0.62779  | 0.36785 | 0.532797 | no          |
| yrhO     | 1.536                         | 1.32344                         | -0.21489             | -0.3845   | 0.5858  | 0.72598  | no          |
| ureC     | 4.56046                       | 3.9353                          | -0.21271             | -0.63115  | 0.37275 | 0.537051 | no          |
| relP     | 18.2485                       | 15.7552                         | -0.21195             | -0.72889  | 0.3061  | 0.475646 | no          |
| pksN     | 5.71624                       | 4.93771                         | -0.21123             | -0.84864  | 0.22325 | 0.389176 | no          |
| yhfQ     | 16.4134                       | 14.1833                         | -0.21069             | -0.79915  | 0.2581  | 0.422325 | no          |
| yxbF     | 1.19275                       | 1.03074                         | -0.21062             | -0.40264  | 0.5675  | 0.711328 | no          |
| btr      | 4.0522                        | 3.50362                         | -0.20986             | -0.65833  | 0.35755 | 0.522336 | no          |
| fabHA    | 70.6075                       | 61.113                          | -0.20834             | -0.84294  | 0.23235 | 0.398162 | no          |
| ydbC     | 4.53338                       | 3.92949                         | -0.20624             | -0.28078  | 0.6865  | 0.80006  | no          |
| ypiB     | 23.6025                       | 20.4602                         | -0.20612             | -0.71103  | 0.3101  | 0.47949  | no          |
| pdaC     | 3.51409                       | 3.047                           | -0.20576             | -0.60121  | 0.39585 | 0.556934 | no          |
| yhcR     | 2.05506                       | 1.7831                          | -0.20479             | -0.65055  | 0.3544  | 0.519507 | no          |
| yuaE     | 21.3847                       | 18.5576                         | -0.20457             | -0.65547  | 0.35355 | 0.519133 | no          |
| yxiT     | 4.08299                       | 3.5436                          | -0.20441             | -0.18426  | 0.79055 | 0.874807 | no          |
| dtpT     | 1.17182                       | 1.01874                         | -0.20196             | -0.42963  | 0.55215 | 0.697945 | no          |
| hemC     | 14.7499                       | 12.833                          | -0.20085             | -0.4995   | 0.4767  | 0.632776 | no          |
| yheA     | 31.9249                       | 27.7799                         | -0.20064             | -0.60345  | 0.38995 | 0.551543 | no          |

| Table S3 | value_als<br>S High<br>sorted | value_als<br>S Normal<br>sorted | log2(fold<br>change) | test_stat | p_value | q_value  | significant |
|----------|-------------------------------|---------------------------------|----------------------|-----------|---------|----------|-------------|
| mutL     | 5.77478                       | 5.02523                         | -0.20058             | -0.72534  | 0.30095 | 0.471173 | no          |
| yugN     | 4.95367                       | 4.31282                         | -0.19987             | -0.30756  | 0.65475 | 0.777372 | no          |
| xyIR     | 1.76204                       | 1.5353                          | -0.19873             | -0.44025  | 0.54135 | 0.689427 | no          |
| cotR     | 0.428769                      | 0.373691                        | -0.19836             | 0         | 1       | 1        | no          |
| ydbP     | 18.6431                       | 16.2603                         | -0.19729             | -0.4788   | 0.5038  | 0.654782 | no          |
| rbgA     | 12.8574                       | 11.2146                         | -0.19722             | -0.68816  | 0.3225  | 0.491801 | no          |
| yqeG     | 20.4165                       | 17.8107                         | -0.19699             | -0.64146  | 0.36835 | 0.533108 | no          |
| yabE     | 14.9165                       | 13.015                          | -0.19673             | -0.76836  | 0.2703  | 0.435231 | no          |
| tagD     | 71.5218                       | 62.4115                         | -0.19657             | -0.75164  | 0.2874  | 0.455964 | no          |
| sspF     | 4.91694                       | 4.29511                         | -0.19507             | -0.11395  | 0.85675 | 0.917174 | no          |
| kinE     | 3.94389                       | 3.44684                         | -0.19434             | -0.63888  | 0.36435 | 0.529371 | no          |
| yrkA     | 14.6241                       | 12.7825                         | -0.19418             | -0.75642  | 0.28385 | 0.451596 | no          |
| ywnH     | 8.3453                        | 7.29871                         | -0.19332             | -0.39847  | 0.57195 | 0.71511  | no          |
| ywqE     | 2.72809                       | 2.38684                         | -0.19279             | -0.41359  | 0.55415 | 0.699542 | no          |
| clsA     | 2.66861                       | 2.33556                         | -0.19233             | -0.52645  | 0.45595 | 0.614405 | no          |
| yfiH     | 0.335115                      | 0.293326                        | -0.19215             | 0         | 1       | 1        | no          |
| ydzT     | 12.2954                       | 10.7649                         | -0.19179             | -0.20118  | 0.7759  | 0.865974 | no          |
| yyzL     | 9.28301                       | 8.12771                         | -0.19174             | -0.0994   | 0.8584  | 0.918312 | no          |
| yrzF     | 3.71729                       | 3.25662                         | -0.19088             | -0.41816  | 0.5488  | 0.695122 | no          |
| atoB     | 0.474885                      | 0.416222                        | -0.19022             | 0         | 1       | 1        | no          |
| yjiB     | 1.5791                        | 1.38636                         | -0.18781             | -0.40122  | 0.5745  | 0.716973 | no          |
| ycbN     | 2.36211                       | 2.07415                         | -0.18756             | -0.41622  | 0.55355 | 0.699241 | no          |
| degR     | 68.8269                       | 60.438                          | -0.18752             | -0.40009  | 0.5846  | 0.725215 | no          |
| ydhl     | 3.11361                       | 2.73428                         | -0.18743             | -0.32562  | 0.6418  | 0.766748 | no          |
| ydzJ     | 48.7754                       | 42.8391                         | -0.18723             | -0.28233  | 0.6808  | 0.796458 | no          |
| yjcA     | 0.643896                      | 0.565608                        | -0.18703             | -0.10756  | 0.8531  | 0.915505 | no          |
| gapB     | 1.99242                       | 1.7504                          | -0.18684             | -0.40814  | 0.55885 | 0.703318 | no          |
| ytIA     | 0.124609                      | 0.109493                        | -0.18656             | 0         | 1       | 1        | no          |
| yhbF     | 5.46055                       | 4.79837                         | -0.1865              | -0.4888   | 0.48675 | 0.640424 | no          |
| yydK     | 2.79538                       | 2.45658                         | -0.1864              | -0.38683  | 0.5831  | 0.723656 | no          |
| ybdN     | 23.7834                       | 20.9045                         | -0.18614             | -0.72386  | 0.29815 | 0.468439 | no          |
| ytfP     | 3.38667                       | 2.97678                         | -0.18612             | -0.52241  | 0.46485 | 0.622133 | no          |
| gntR     | 1.59269                       | 1.39997                         | -0.18606             | -0.18461  | 0.79385 | 0.876474 | no          |
| ypbF     | 5.00109                       | 4.39649                         | -0.18589             | -0.36722  | 0.6036  | 0.739935 | no          |
| yoaA     | 4.19498                       | 3.68833                         | -0.1857              | -0.38337  | 0.58155 | 0.722391 | no          |
| yojA     | 0.249569                      | 0.219461                        | -0.18547             | 0         | 1       | 1        | no          |
| yitI     | 5.03789                       | 4.43411                         | -0.18418             | -0.36814  | 0.6013  | 0.737842 | no          |
| prs      | 36.7717                       | 32.3777                         | -0.18359             | -0.73543  | 0.2921  | 0.461575 | no          |
| khtS     | 6.14951                       | 5.41595                         | -0.18326             | -0.3099   | 0.6605  | 0.78221  | no          |
| ydfH     | 2.09848                       | 1.84835                         | -0.18311             | -0.40993  | 0.56375 | 0.707577 | no          |
| kinB     | 3.60042                       | 3.17291                         | -0.18236             | -0.51982  | 0.46415 | 0.621641 | no          |
| yocA     | 13.6392                       | 12.0234                         | -0.18191             | -0.59387  | 0.4072  | 0.569683 | no          |
| dinF     | 3.05964                       | 2.69922                         | -0.18082             | -0.5044   | 0.4741  | 0.631119 | no          |
| lytE     | 36.6027                       | 32.2956                         | -0.18061             | -0.72454  | 0.3028  | 0.473077 | no          |

| Table S3 | value_als<br>S High<br>sorted | value_als<br>S Normal<br>sorted | log2(fold<br>change) | test_stat | p_value | q_value  | significant |
|----------|-------------------------------|---------------------------------|----------------------|-----------|---------|----------|-------------|
| yybP     | 1.29708                       | 1.14458                         | -0.18046             | -0.18896  | 0.78145 | 0.869727 | no          |
| yitT     | 6.31921                       | 5.57732                         | -0.18017             | -0.51916  | 0.4632  | 0.620881 | no          |
| rpsI     | 543.399                       | 480.029                         | -0.17889             | -0.71461  | 0.312   | 0.481165 | no          |
| ysnF     | 1.10877                       | 0.979521                        | -0.17881             | -0.27755  | 0.6849  | 0.79881  | no          |
| ywpD     | 0.712579                      | 0.629655                        | -0.17849             | -0.23031  | 0.754   | 0.85238  | no          |
| ydfI     | 1.5725                        | 1.38972                         | -0.17826             | -0.21765  | 0.7561  | 0.85347  | no          |
| yqzL     | 300.156                       | 265.289                         | -0.17815             | -0.46825  | 0.5104  | 0.661748 | no          |
| fabF     | 71.791                        | 63.5313                         | -0.17633             | -0.71362  | 0.31515 | 0.484068 | no          |
| feuA     | 5.19524                       | 4.5985                          | -0.17603             | -0.50524  | 0.4796  | 0.63527  | no          |
| splA     | 9.30353                       | 8.24113                         | -0.17494             | -0.23122  | 0.73275 | 0.83698  | no          |
| yhgD     | 3.71197                       | 3.28864                         | -0.17469             | -0.36133  | 0.6049  | 0.740799 | no          |
| rny      | 126.408                       | 112                             | -0.1746              | -0.66201  | 0.34455 | 0.511958 | no          |
| yaaQ     | 30.3702                       | 26.9251                         | -0.1737              | -0.4984   | 0.48345 | 0.637853 | no          |
| sspl     | 1.8275                        | 1.62289                         | -0.17131             | -0.24646  | 0.8452  | 0.911557 | no          |
| yxkH     | 3.90074                       | 3.46508                         | -0.17086             | -0.43247  | 0.53915 | 0.687798 | no          |
| yqjY     | 21.1017                       | 18.7474                         | -0.17067             | -0.53533  | 0.45195 | 0.612051 | no          |
| pyrAB    | 31.6606                       | 28.1296                         | -0.1706              | -0.3236   | 0.6419  | 0.766748 | no          |
| glpG     | 6.7027                        | 5.9574                          | -0.17006             | -0.60414  | 0.3871  | 0.549109 | no          |
| ykoV     | 0.51567                       | 0.458578                        | -0.16928             | -0.19915  | 0.7806  | 0.869207 | no          |
| yuzN     | 19.7829                       | 17.5974                         | -0.16889             | -0.37153  | 0.61305 | 0.747349 | no          |
| yyaS     | 2.30514                       | 2.05101                         | -0.16852             | -0.26623  | 0.7064  | 0.816372 | no          |
| ykbA     | 3.9171                        | 3.48554                         | -0.1684              | -0.49637  | 0.48145 | 0.636591 | no          |
| ppsD     | 0.2435                        | 0.216713                        | -0.16814             | 0         | 1       | 1        | no          |
| araR     | 2.79072                       | 2.48437                         | -0.16776             | -0.42557  | 0.5436  | 0.691197 | no          |
| gabD     | 2.41142                       | 2.14801                         | -0.16688             | -0.44156  | 0.52795 | 0.677277 | no          |
| pksR     | 4.74098                       | 4.22595                         | -0.16591             | -0.66806  | 0.3449  | 0.512274 | no          |
| bsaA     | 5.60755                       | 5.00383                         | -0.16434             | -0.35533  | 0.6173  | 0.74971  | no          |
| yvkA     | 1.94661                       | 1.7375                          | -0.16395             | -0.39991  | 0.5693  | 0.713344 | no          |
| yrvM     | 12.2107                       | 10.9017                         | -0.1636              | -0.54422  | 0.44405 | 0.60514  | no          |
| yjdB     | 7.09041                       | 6.33145                         | -0.16333             | -0.30284  | 0.66385 | 0.784435 | no          |
| ilvK     | 31.6307                       | 28.2549                         | -0.16282             | -0.65289  | 0.35345 | 0.519133 | no          |
| ctaB     | 22.8106                       | 20.3823                         | -0.16239             | -0.63467  | 0.36125 | 0.526108 | no          |
| ydzW     | 11.3196                       | 10.1147                         | -0.16237             | -0.37594  | 0.59315 | 0.732173 | no          |
| rex      | 16.9182                       | 15.1185                         | -0.16226             | -0.49351  | 0.4829  | 0.637672 | no          |
| yobU     | 0.557665                      | 0.498923                        | -0.16058             | -0.12279  | 0.8806  | 0.928334 | no          |
| yqhQ     | 7.73882                       | 6.92778                         | -0.15972             | -0.50771  | 0.4714  | 0.628421 | no          |
| cypC     | 1.69957                       | 1.52266                         | -0.15858             | -0.358    | 0.6126  | 0.747349 | no          |
| recN     | 9.32286                       | 8.36357                         | -0.15665             | -0.60448  | 0.3858  | 0.547956 | no          |
| cccB     | 42.1296                       | 37.8312                         | -0.15526             | -0.4942   | 0.4907  | 0.644164 | no          |
| pksJ     | 5.78808                       | 5.1998                          | -0.15463             | -0.39089  | 0.57165 | 0.71511  | no          |
| aroD     | 19.7586                       | 17.7521                         | -0.15449             | -0.52612  | 0.45155 | 0.611788 | no          |
| hemX     | 16.5734                       | 14.9017                         | -0.15339             | -0.56299  | 0.418   | 0.580228 | no          |
| rtbD     | 5.03929                       | 4.53295                         | -0.15277             | -0.48951  | 0.48295 | 0.637672 | no          |
| ybbP     | 9.59299                       | 8.63385                         | -0.15198             | -0.33348  | 0.6366  | 0.763103 | no          |

| Table S3 | value_als<br>S High<br>sorted | value_als<br>S Normal<br>sorted | log2(fold<br>change) | test_stat | p_value | q_value  | significant |
|----------|-------------------------------|---------------------------------|----------------------|-----------|---------|----------|-------------|
| liaH     | 8.1908                        | 7.37855                         | -0.15067             | -0.43255  | 0.5397  | 0.688265 | no          |
| fadH     | 2.52716                       | 2.27703                         | -0.15036             | -0.31349  | 0.65795 | 0.779684 | no          |
| xkdA     | 1.35513                       | 1.22112                         | -0.15022             | -0.20728  | 0.77385 | 0.865101 | no          |
| mmsA     | 1.2478                        | 1.12445                         | -0.15016             | -0.32405  | 0.641   | 0.766748 | no          |
| yugM     | 9.86995                       | 8.8967                          | -0.14977             | -0.3339   | 0.6405  | 0.766748 | no          |
| alsD     | 3.55923                       | 3.21406                         | -0.14717             | -0.34778  | 0.62275 | 0.753027 | no          |
| araQ     | 0.385088                      | 0.347784                        | -0.147               | 0         | 1       | 1        | no          |
| hsIO     | 10.2378                       | 9.2508                          | -0.14625             | -0.48742  | 0.48425 | 0.638485 | no          |
| spolIIAF | 0.301183                      | 0.272206                        | -0.14594             | 0         | 1       | 1        | no          |
| tmrB     | 2.02051                       | 1.82644                         | -0.14568             | -0.24181  | 0.73765 | 0.841548 | no          |
| yfmQ     | 24.237                        | 21.9206                         | -0.14492             | -0.46384  | 0.51405 | 0.665086 | no          |
| yfhO     | 3.14                          | 2.84067                         | -0.14453             | -0.44417  | 0.5237  | 0.672917 | no          |
| artP     | 53.6883                       | 48.5736                         | -0.14444             | -0.57969  | 0.40955 | 0.571686 | no          |
| cydA     | 4.73273                       | 4.28206                         | -0.14437             | -0.37021  | 0.595   | 0.733671 | no          |
| ywzB     | 29.9152                       | 27.068                          | -0.14429             | -0.30155  | 0.6659  | 0.785863 | no          |
| rho      | 17.0348                       | 15.419                          | -0.14378             | -0.56641  | 0.4161  | 0.57845  | no          |
| nadD     | 22.2921                       | 20.1842                         | -0.14331             | -0.40878  | 0.55505 | 0.699542 | no          |
| ypsA     | 10.7082                       | 9.69651                         | -0.14318             | -0.40388  | 0.5717  | 0.71511  | no          |
| mccA     | 3.13946                       | 2.84293                         | -0.14314             | -0.35245  | 0.6168  | 0.74971  | no          |
| yccK     | 2.52349                       | 2.28548                         | -0.14293             | -0.3285   | 0.64435 | 0.768691 | no          |
| yjbO     | 19.592                        | 17.7471                         | -0.14268             | -0.54395  | 0.44035 | 0.602075 | no          |
| yqjA     | 8.40048                       | 7.61632                         | -0.14138             | -0.46261  | 0.51235 | 0.663125 | no          |
| yfkJ     | 12.9458                       | 11.7472                         | -0.14017             | -0.39221  | 0.57505 | 0.71718  | no          |
| metN     | 34.6189                       | 31.4304                         | -0.1394              | -0.42289  | 0.5442  | 0.691235 | no          |
| pksl     | 2.85838                       | 2.59513                         | -0.13939             | -0.30097  | 0.6774  | 0.794882 | no          |
| yaaB     | 28.5122                       | 25.9169                         | -0.13769             | -0.30105  | 0.6638  | 0.784435 | no          |
| ydgF     | 6.06798                       | 5.51732                         | -0.13725             | -0.4602   | 0.5173  | 0.667219 | no          |
| tagH     | 8.64959                       | 7.86472                         | -0.13724             | -0.51922  | 0.46345 | 0.620927 | no          |
| pksM     | 6.82613                       | 6.20678                         | -0.13722             | -0.55374  | 0.42435 | 0.586841 | no          |
| yqjN     | 3.29411                       | 2.99799                         | -0.13589             | -0.41182  | 0.5643  | 0.707792 | no          |
| yyaJ     | 1.82825                       | 1.66549                         | -0.13452             | -0.32322  | 0.6504  | 0.774424 | no          |
| yqzF     | 30.3035                       | 27.6171                         | -0.13392             | -0.28901  | 0.6803  | 0.796458 | no          |
| ppnKA    | 14.3457                       | 13.0768                         | -0.13361             | -0.47224  | 0.49925 | 0.652274 | no          |
| ywcE     | 17.4322                       | 15.8913                         | -0.13351             | -0.26453  | 0.7095  | 0.818941 | no          |
| folK     | 45.3357                       | 41.3512                         | -0.13272             | -0.28335  | 0.68085 | 0.796458 | no          |
| ybcL     | 1.29925                       | 1.18564                         | -0.13201             | -0.26632  | 0.7049  | 0.814891 | no          |
| xkdQ     | 2.39391                       | 2.18475                         | -0.13191             | -0.27904  | 0.6892  | 0.801955 | no          |
| dltC     | 76.8309                       | 70.126                          | -0.13174             | -0.17543  | 0.80185 | 0.880879 | no          |
| codV     | 18.2752                       | 16.6816                         | -0.13163             | -0.5039   | 0.47095 | 0.62827  | no          |
| yoqW     | 0.588773                      | 0.537439                        | -0.13161             | -0.13215  | 0.8636  | 0.920549 | no          |
| ynzI     | 24.6995                       | 22.5496                         | -0.13138             | -0.15497  | 0.81305 | 0.88978  | no          |
| yuel     | 18.9794                       | 17.3288                         | -0.13126             | -0.37448  | 0.58695 | 0.726502 | no          |
| thiT     | 27.97                         | 25.5453                         | -0.13083             | -0.48396  | 0.4912  | 0.644463 | no          |
| slpH     | 0.502424                      | 0.458954                        | -0.13056             | 0         | 1       | 1        | no          |

| Table S3 | value_als<br>S High<br>sorted | value_als<br>S Normal<br>sorted | log2(fold<br>change) | test_stat | p_value | q_value  | significant |
|----------|-------------------------------|---------------------------------|----------------------|-----------|---------|----------|-------------|
| ycgG     | 1.59279                       | 1.455                           | -0.13054             | -0.22798  | 0.74885 | 0.849652 | no          |
| ansR     | 6.13721                       | 5.61108                         | -0.1293              | -0.23016  | 0.73975 | 0.842256 | no          |
| yfhH     | 16.9832                       | 15.5471                         | -0.12746             | -0.30023  | 0.6774  | 0.794882 | no          |
| thiQ     | 11.2202                       | 10.2736                         | -0.12715             | -0.48209  | 0.49415 | 0.646969 | no          |
| pksL     | 7.50517                       | 6.87323                         | -0.1269              | -0.34777  | 0.617   | 0.74971  | no          |
| xtmA     | 1.54035                       | 1.41089                         | -0.12665             | -0.17526  | 0.7995  | 0.88011  | no          |
| abrB     | 30.478                        | 27.9417                         | -0.12534             | -0.3288   | 0.64105 | 0.766748 | no          |
| ohrB     | 15.8724                       | 14.5547                         | -0.12504             | -0.3457   | 0.61615 | 0.749597 | no          |
| bsdC     | 0.185415                      | 0.170032                        | -0.12495             | 0         | 1       | 1        | no          |
| yeeF     | 5.56957                       | 5.10812                         | -0.12477             | -0.45704  | 0.51705 | 0.667219 | no          |
| yfjP     | 2.96405                       | 2.71883                         | -0.12458             | -0.29333  | 0.68315 | 0.797824 | no          |
| folP     | 13.0656                       | 11.9864                         | -0.12437             | -0.21059  | 0.75895 | 0.854878 | no          |
| panE     | 6.1522                        | 5.64463                         | -0.12422             | -0.36855  | 0.5999  | 0.737093 | no          |
| yflI     | 50.4324                       | 46.2768                         | -0.12406             | -0.18494  | 0.7965  | 0.878361 | no          |
| gerBC    | 0.518453                      | 0.476276                        | -0.12242             | -0.13051  | 0.85045 | 0.914099 | no          |
| yxel     | 5.61729                       | 5.16794                         | -0.12028             | -0.26713  | 0.7069  | 0.816697 | no          |
| ytxJ     | 36.0712                       | 33.1868                         | -0.12024             | -0.35803  | 0.6156  | 0.749234 | no          |
| spoOF    | 15.9338                       | 14.6721                         | -0.11901             | -0.31173  | 0.657   | 0.778984 | no          |
| sipT     | 14.3041                       | 13.1745                         | -0.11868             | -0.3719   | 0.60045 | 0.737284 | no          |
| sspN     | 5.63217                       | 5.18809                         | -0.11849             | -0.06365  | 0.8543  | 0.915505 | no          |
| mbl      | 30.4155                       | 28.0185                         | -0.11843             | -0.47298  | 0.5017  | 0.653678 | no          |
| ydbT     | 16.8325                       | 15.5073                         | -0.1183              | -0.41318  | 0.5545  | 0.699542 | no          |
| acsA     | 6.84458                       | 6.30719                         | -0.11796             | -0.43566  | 0.5357  | 0.684567 | no          |
| moaA     | 2.71904                       | 2.50769                         | -0.11674             | -0.28743  | 0.68695 | 0.800334 | no          |
| flgC     | 36.6994                       | 33.8549                         | -0.11639             | -0.35017  | 0.61835 | 0.74971  | no          |
| yxal     | 2.44181                       | 2.25318                         | -0.11599             | -0.16353  | 0.80905 | 0.886442 | no          |
| ylmE     | 38.5768                       | 35.6141                         | -0.11529             | -0.37014  | 0.5988  | 0.736469 | no          |
| yceH     | 22.9789                       | 21.222                          | -0.11475             | -0.45433  | 0.5173  | 0.667219 | no          |
| ykoU     | 0.49515                       | 0.457351                        | -0.11456             | 0         | 1       | 1        | no          |
| ppsE     | 0.466277                      | 0.430824                        | -0.11409             | 0         | 1       | 1        | no          |
| ypzI     | 16.8671                       | 15.5858                         | -0.11398             | -0.08199  | 0.87965 | 0.928119 | no          |
| racA     | 3.20548                       | 2.96256                         | -0.1137              | -0.21884  | 0.74865 | 0.849652 | no          |
| ydzS     | 19.6578                       | 18.1683                         | -0.11368             | -0.05827  | 0.83795 | 0.907192 | no          |
| ybbA     | 1.29506                       | 1.197                           | -0.1136              | -0.11785  | 0.8685  | 0.922611 | no          |
| natB     | 0.748486                      | 0.69192                         | -0.11337             | -0.1825   | 0.79465 | 0.876839 | no          |
| crcBA    | 2.74338                       | 2.53655                         | -0.11309             | -0.09536  | 0.8981  | 0.939146 | no          |
| yvfG     | 36.7204                       | 33.9628                         | -0.11263             | -0.24015  | 0.7375  | 0.841548 | no          |
| yzkM     | 24.377                        | 22.5507                         | -0.11235             | -0.11949  | 0.87135 | 0.924276 | no          |
| polA     | 7.3486                        | 6.79912                         | -0.11212             | -0.44146  | 0.52655 | 0.675881 | no          |
| yurT     | 7.93609                       | 7.34322                         | -0.11202             | -0.23595  | 0.73445 | 0.838666 | no          |
| yukF     | 1.83874                       | 1.70467                         | -0.10922             | -0.25625  | 0.71905 | 0.826387 | no          |
| yqaT     | 0.250504                      | 0.232315                        | -0.10876             | 0         | 1       | 1        | no          |
| trnJ-Pro | 667.728                       | 619.573                         | -0.10799             | -0.15749  | 0.81915 | 0.892991 | no          |
| yetL     | 2.13303                       | 1.97976                         | -0.10758             | -0.16285  | 0.8164  | 0.891611 | no          |



| Table S3 | value_als<br>S High<br>sorted | value_als<br>S Normal<br>sorted | log2(fold<br>change) | test_stat | p_value | q_value  | significant |
|----------|-------------------------------|---------------------------------|----------------------|-----------|---------|----------|-------------|
| nupO     | 4.52322                       | 4.19968                         | -0.10707             | -0.30342  | 0.6693  | 0.788983 | no          |
| yczM     | 26.7108                       | 24.8159                         | -0.10616             | -1.20216  | 0.34905 | 0.516384 | no          |
| iolR     | 8.41939                       | 7.82238                         | -0.10611             | -0.32058  | 0.65195 | 0.775578 | no          |
| albF     | 2.31417                       | 2.1517                          | -0.10502             | -0.23478  | 0.73815 | 0.841604 | no          |
| yticC    | 0.229855                      | 0.213745                        | -0.10483             | 0         | 1       | 1        | no          |
| walkK    | 6.39167                       | 5.94715                         | -0.104               | -0.28109  | 0.6916  | 0.80342  | no          |
| kapD     | 1.19252                       | 1.10991                         | -0.10358             | -0.14047  | 0.82765 | 0.899693 | no          |
| bpsA     | 0.461266                      | 0.429346                        | -0.10346             | 0         | 1       | 1        | no          |
| yxO      | 5.25624                       | 4.89435                         | -0.10292             | -0.27498  | 0.69175 | 0.80342  | no          |
| era      | 34.0144                       | 31.6762                         | -0.10274             | -0.35566  | 0.6094  | 0.744844 | no          |
| yfiR     | 6.05677                       | 5.64189                         | -0.10237             | -0.23438  | 0.73725 | 0.841548 | no          |
| yrdD     | 6.0962                        | 5.67983                         | -0.10206             | -0.07761  | 0.90355 | 0.942299 | no          |
| rocB     | 0.983741                      | 0.917358                        | -0.10079             | -0.15984  | 0.81875 | 0.892877 | no          |
| murF     | 3.71912                       | 3.46842                         | -0.10068             | -0.29766  | 0.67445 | 0.792755 | no          |
| dusB     | 36.2016                       | 33.763                          | -0.10061             | -0.40405  | 0.55875 | 0.703318 | no          |
| yhcZ     | 7.80917                       | 7.28321                         | -0.1006              | -0.20742  | 0.7644  | 0.859315 | no          |
| whiA     | 12.4302                       | 11.5946                         | -0.1004              | -0.36235  | 0.5996  | 0.737029 | no          |
| ygaO     | 9.69817                       | 9.05538                         | -0.09894             | -0.2583   | 0.7158  | 0.824429 | no          |
| glgC     | 0.323617                      | 0.302195                        | -0.09881             | 0         | 1       | 1        | no          |
| araD     | 0.41908                       | 0.39135                         | -0.09877             | 0         | 1       | 1        | no          |
| yfiL     | 0.430583                      | 0.402335                        | -0.09789             | 0         | 1       | 1        | no          |
| mutM     | 6.53664                       | 6.11187                         | -0.09694             | -0.2826   | 0.6877  | 0.800958 | no          |
| ykuC     | 6.3199                        | 5.90946                         | -0.09688             | -0.32469  | 0.6414  | 0.766748 | no          |
| dnal     | 7.82993                       | 7.3224                          | -0.09668             | -0.30777  | 0.66495 | 0.785238 | no          |
| yuxN     | 6.57129                       | 6.14597                         | -0.09653             | -0.28542  | 0.68625 | 0.800018 | no          |
| ykaA     | 13.0655                       | 12.222                          | -0.09628             | -0.30116  | 0.6778  | 0.794882 | no          |
| csbA     | 24.1188                       | 22.5662                         | -0.096               | -0.18734  | 0.7907  | 0.874807 | no          |
| lexA     | 11.9462                       | 11.1785                         | -0.09583             | -0.29382  | 0.67375 | 0.792372 | no          |
| trnD-Val | 1856.91                       | 1737.73                         | -0.0957              | -0.21057  | 0.765   | 0.859618 | no          |
| yvdA     | 0.310849                      | 0.290964                        | -0.09538             | 0         | 1       | 1        | no          |
| glcU     | 0.184019                      | 0.17226                         | -0.09527             | 0         | 1       | 1        | no          |
| yxaM     | 39.6013                       | 37.0996                         | -0.09414             | -0.21466  | 0.7554  | 0.852937 | no          |
| ygaJ     | 11.1751                       | 10.4719                         | -0.09376             | -0.29401  | 0.6765  | 0.794606 | no          |
| nfrAA    | 5.50238                       | 5.15758                         | -0.09336             | -0.25327  | 0.71785 | 0.825771 | no          |
| xkdX     | 34.1936                       | 32.0573                         | -0.09307             | -0.1189   | 0.86875 | 0.922614 | no          |
| yxnA     | 1.01126                       | 0.948567                        | -0.09233             | -0.16107  | 0.82005 | 0.892991 | no          |
| yhjP     | 1.14876                       | 1.07756                         | -0.09231             | -0.21096  | 0.76605 | 0.860492 | no          |
| dacC     | 4.18955                       | 3.93258                         | -0.09132             | -0.28545  | 0.6934  | 0.805086 | no          |
| yqeY     | 353.457                       | 331.869                         | -0.09092             | -0.36637  | 0.6057  | 0.741293 | no          |
| moaB     | 5.30418                       | 4.98064                         | -0.0908              | -0.20145  | 0.7744  | 0.865233 | no          |
| aag      | 1.8459                        | 1.73456                         | -0.08975             | -0.14345  | 0.84775 | 0.913527 | no          |
| spbC     | 1160.46                       | 1090.48                         | -0.08974             | -0.33501  | 0.63355 | 0.760663 | no          |
| yojO     | 6.91662                       | 6.50012                         | -0.0896              | -0.33926  | 0.62385 | 0.753442 | no          |
| yxcA     | 46.7907                       | 43.9746                         | -0.08955             | -0.2384   | 0.7389  | 0.842116 | no          |

| Table S3 | value_als<br>S High<br>sorted | value_als<br>S Normal<br>sorted | log2(fold<br>change) | test_stat | p_value | q_value  | significant |
|----------|-------------------------------|---------------------------------|----------------------|-----------|---------|----------|-------------|
| rapB     | 13.7838                       | 12.957                          | -0.08924             | -0.34163  | 0.62745 | 0.756015 | no          |
| yutC     | 1.81737                       | 1.70892                         | -0.08877             | -0.14868  | 0.841   | 0.909082 | no          |
| bofA     | 6.36182                       | 5.98597                         | -0.08785             | -0.11442  | 0.86495 | 0.921462 | no          |
| iolS     | 7.27882                       | 6.8489                          | -0.08783             | -0.27515  | 0.70415 | 0.814276 | no          |
| yqxL     | 2.16951                       | 2.0426                          | -0.08696             | -0.19278  | 0.78325 | 0.870692 | no          |
| levG     | 2.25187                       | 2.12019                         | -0.08693             | -0.18026  | 0.79465 | 0.876839 | no          |
| ydeR     | 0.251487                      | 0.236868                        | -0.0864              | 0         | 1       | 1        | no          |
| yvgO     | 8.73618                       | 8.23206                         | -0.08575             | -0.21909  | 0.7526  | 0.851748 | no          |
| clpP     | 101.08                        | 95.3357                         | -0.08441             | -0.3408   | 0.62765 | 0.756015 | no          |
| yuxK     | 8.37865                       | 7.90388                         | -0.08416             | -0.19254  | 0.7753  | 0.865721 | no          |
| rplU     | 477.681                       | 450.858                         | -0.08337             | -0.33752  | 0.6239  | 0.753442 | no          |
| moaC     | 9.12488                       | 8.61766                         | -0.08251             | -0.15103  | 0.827   | 0.899248 | no          |
| mleN     | 3.76885                       | 3.56267                         | -0.08117             | -0.2439   | 0.7274  | 0.832855 | no          |
| ybeC     | 7.93296                       | 7.50139                         | -0.0807              | -0.30245  | 0.6637  | 0.784435 | no          |
| exlX     | 4.9116                        | 4.64475                         | -0.08059             | -0.20556  | 0.7694  | 0.861968 | no          |
| csgA     | 0.36458                       | 0.344892                        | -0.08009             | 0         | 1       | 1        | no          |
| ftsR     | 4.36405                       | 4.13028                         | -0.07943             | -0.21158  | 0.76655 | 0.860492 | no          |
| yhaL     | 4.66768                       | 4.41845                         | -0.07916             | -0.06276  | 0.8921  | 0.936755 | no          |
| pth      | 12.2452                       | 11.5929                         | -0.07898             | -0.23666  | 0.73945 | 0.842256 | no          |
| yoZK     | 0.148366                      | 0.140471                        | -0.07889             | 0         | 1       | 1        | no          |
| cotZ     | 0.088854                      | 0.084148                        | -0.07851             | 0         | 1       | 1        | no          |
| cotJC    | 0.118266                      | 0.112016                        | -0.07832             | 0         | 1       | 1        | no          |
| cotO     | 0.487495                      | 0.461812                        | -0.07808             | 0         | 1       | 1        | no          |
| yugF     | 0.954383                      | 0.904174                        | -0.07797             | -0.11523  | 0.8581  | 0.918312 | no          |
| ganP     | 0.923641                      | 0.875066                        | -0.07794             | -0.1435   | 0.848   | 0.913527 | no          |
| xepA     | 3.73707                       | 3.54253                         | -0.07713             | -0.19485  | 0.78225 | 0.870099 | no          |
| rsiX     | 8.39611                       | 7.96589                         | -0.07589             | -0.22251  | 0.74595 | 0.847392 | no          |
| rocD     | 2.93771                       | 2.78866                         | -0.07512             | -0.20251  | 0.77605 | 0.865974 | no          |
| thiM     | 2.28474                       | 2.16896                         | -0.07503             | -0.11482  | 0.86675 | 0.92218  | no          |
| ydaD     | 0.937497                      | 0.890267                        | -0.07458             | -0.11332  | 0.855   | 0.915564 | no          |
| azlC     | 3.19179                       | 3.03112                         | -0.07451             | -0.16158  | 0.81735 | 0.891611 | no          |
| ydgl     | 2.71466                       | 2.57807                         | -0.07448             | -0.14553  | 0.83155 | 0.902619 | no          |
| sdhA     | 38.8922                       | 36.944                          | -0.07414             | -0.30046  | 0.6615  | 0.782897 | no          |
| xre      | 20.3863                       | 19.376                          | -0.07332             | -0.19534  | 0.7771  | 0.865974 | no          |
| scoC     | 51.6262                       | 49.1288                         | -0.07153             | -0.27245  | 0.698   | 0.808724 | no          |
| ykuL     | 7.60952                       | 7.24258                         | -0.0713              | -0.1643   | 0.81475 | 0.89039  | no          |
| spoVID   | 0.199538                      | 0.189938                        | -0.07114             | 0         | 1       | 1        | no          |
| yazB     | 114.123                       | 108.751                         | -0.06957             | -0.07585  | 0.92085 | 0.951318 | no          |
| hemH     | 8.55247                       | 8.15325                         | -0.06897             | -0.22473  | 0.7471  | 0.84844  | no          |
| yceG     | 14.6641                       | 14.0011                         | -0.06676             | -0.26542  | 0.69995 | 0.810423 | no          |
| rsgl     | 3.11066                       | 2.97028                         | -0.06662             | -0.14812  | 0.83025 | 0.902211 | no          |
| trnD-Ser | 773.072                       | 738.201                         | -0.06659             | -0.1393   | 0.8408  | 0.909082 | no          |
| ywbC     | 25.5882                       | 24.4363                         | -0.06645             | -0.20073  | 0.7714  | 0.863543 | no          |
| sdhB     | 43.6581                       | 41.6965                         | -0.06632             | -0.26501  | 0.7087  | 0.81827  | no          |

| Table S3 | value_als<br>S High<br>sorted | value_als<br>S Normal<br>sorted | log2(fold<br>change) | test_stat | p_value | q_value  | significant |
|----------|-------------------------------|---------------------------------|----------------------|-----------|---------|----------|-------------|
| yycl     | 7.70387                       | 7.35839                         | -0.06619             | -0.1199   | 0.86665 | 0.92218  | no          |
| dctS     | 1.87179                       | 1.78899                         | -0.06527             | -0.15556  | 0.82365 | 0.896127 | no          |
| ndk      | 47.9744                       | 45.8548                         | -0.06519             | -0.24733  | 0.717   | 0.825047 | no          |
| thil     | 4.89619                       | 4.68101                         | -0.06484             | -0.19868  | 0.78185 | 0.869913 | no          |
| ydgE     | 6.01737                       | 5.75559                         | -0.06417             | -0.14238  | 0.8433  | 0.910608 | no          |
| infC     | 199.327                       | 190.725                         | -0.06364             | -0.25772  | 0.71135 | 0.820822 | no          |
| mutY     | 5.28461                       | 5.06112                         | -0.06234             | -0.18995  | 0.78945 | 0.874755 | no          |
| ydcC     | 3.37361                       | 3.23152                         | -0.06208             | -0.16432  | 0.81455 | 0.89039  | no          |
| sdhC     | 48.9384                       | 46.9048                         | -0.06123             | -0.24228  | 0.7247  | 0.831007 | no          |
| yktB     | 6.7215                        | 6.443                           | -0.06105             | -0.16463  | 0.81425 | 0.89039  | no          |
| hpf      | 105.406                       | 101.075                         | -0.06053             | -0.24435  | 0.7291  | 0.833831 | no          |
| arsB     | 2.49411                       | 2.39239                         | -0.06007             | -0.14559  | 0.8338  | 0.904272 | no          |
| yhjM     | 8.57959                       | 8.23116                         | -0.05981             | -0.20024  | 0.7764  | 0.865974 | no          |
| moaE     | 10.5143                       | 10.0914                         | -0.05922             | -0.10744  | 0.88285 | 0.929919 | no          |
| yumB     | 0.94347                       | 0.905987                        | -0.05849             | -0.10694  | 0.8806  | 0.928334 | no          |
| yfmP     | 8.01765                       | 7.70052                         | -0.05822             | -0.13383  | 0.8502  | 0.914099 | no          |
| pksC     | 5.04427                       | 4.84498                         | -0.05816             | -0.16241  | 0.81945 | 0.892991 | no          |
| bshR     | 50.8039                       | 48.8383                         | -0.05693             | -0.21592  | 0.75655 | 0.853655 | no          |
| levD     | 2.6412                        | 2.54223                         | -0.0551              | -0.06852  | 0.92705 | 0.956244 | no          |
| acuC     | 3.18812                       | 3.07035                         | -0.0543              | -0.13834  | 0.8454  | 0.911557 | no          |
| ywiB     | 11.8143                       | 11.391                          | -0.05264             | -0.077    | 0.9117  | 0.946054 | no          |
| yuzE     | 1.71295                       | 1.65158                         | -0.05264             | -0.05844  | 0.9235  | 0.953109 | no          |
| rhaB     | 0.928192                      | 0.895785                        | -0.05127             | -0.10138  | 0.891   | 0.935863 | no          |
| yurQ     | 9.65119                       | 9.31597                         | -0.051               | -0.11482  | 0.8671  | 0.92218  | no          |
| ywnB     | 2.76915                       | 2.67326                         | -0.05084             | -0.10182  | 0.893   | 0.937278 | no          |
| yjiC     | 1.94583                       | 1.87862                         | -0.05071             | -0.11915  | 0.8617  | 0.919836 | no          |
| proI     | 2.10347                       | 2.03169                         | -0.0501              | -0.10386  | 0.89085 | 0.935863 | no          |
| cccA     | 23.2502                       | 22.4578                         | -0.05003             | -0.14261  | 0.8401  | 0.908993 | no          |
| ydeA     | 1.65411                       | 1.59851                         | -0.04933             | -0.07674  | 0.93265 | 0.959371 | no          |
| ykuK     | 32.458                        | 31.3759                         | -0.04892             | -0.18105  | 0.8007  | 0.880628 | no          |
| glnT     | 0.05636                       | 0.054504                        | -0.0483              | 0         | 1       | 1        | no          |
| artR     | 28.3537                       | 27.423                          | -0.04815             | -0.13218  | 0.8495  | 0.914099 | no          |
| yvaA     | 15.6416                       | 15.1328                         | -0.04771             | -0.18425  | 0.78985 | 0.874755 | no          |
| phrF     | 1072.63                       | 1037.79                         | -0.04764             | -0.03309  | 0.9639  | 0.972858 | no          |
| ywgA     | 13.1598                       | 12.7421                         | -0.04653             | -0.13545  | 0.84845 | 0.913527 | no          |
| ilvA     | 43.8729                       | 42.4846                         | -0.04639             | -0.18813  | 0.7886  | 0.874755 | no          |
| yuiH     | 0.991554                      | 0.960232                        | -0.04631             | -0.05714  | 0.93165 | 0.958606 | no          |
| ycbU     | 2.636                         | 2.55319                         | -0.04605             | -0.11691  | 0.8676  | 0.92218  | no          |
| xkdN     | 8.03167                       | 7.78738                         | -0.04456             | -0.10537  | 0.8775  | 0.926585 | no          |
| frlB     | 5.4645                        | 5.29953                         | -0.04422             | -0.13066  | 0.8538  | 0.915505 | no          |
| dat      | 40.3139                       | 39.097                          | -0.04422             | -0.17684  | 0.79335 | 0.876236 | no          |
| ylzA     | 127.116                       | 123.295                         | -0.04404             | -0.16046  | 0.81705 | 0.891611 | no          |
| yflT     | 16.7614                       | 16.2592                         | -0.04388             | -0.11276  | 0.878   | 0.92664  | no          |
| ysxB     | 1150.72                       | 1116.88                         | -0.04307             | -0.16526  | 0.812   | 0.888891 | no          |

| Table S3  | value_als<br>S High<br>sorted | value_als<br>S Normal<br>sorted | log2(fold<br>change) | test_stat | p_value | q_value  | significant |
|-----------|-------------------------------|---------------------------------|----------------------|-----------|---------|----------|-------------|
| yvzF      | 106.685                       | 103.612                         | -0.04216             | -0.10792  | 0.8838  | 0.930394 | no          |
| spoVB     | 0.966302                      | 0.938834                        | -0.0416              | -0.08541  | 0.8974  | 0.939045 | no          |
| ymaE      | 9.56074                       | 9.29137                         | -0.04123             | -0.1333   | 0.85335 | 0.915505 | no          |
| mrpC      | 15.9076                       | 15.4662                         | -0.0406              | -0.03871  | 0.9509  | 0.968589 | no          |
| yabT      | 0.667245                      | 0.649005                        | -0.03999             | -0.04853  | 0.9544  | 0.969166 | no          |
| citA      | 3.35835                       | 3.26719                         | -0.0397              | -0.10782  | 0.87405 | 0.926136 | no          |
| ytoA      | 21.5127                       | 20.9395                         | -0.03896             | -0.13016  | 0.85415 | 0.915505 | no          |
| ypfB      | 7.42017                       | 7.22359                         | -0.03874             | -0.02828  | 0.88535 | 0.931501 | no          |
| rplGA     | 114.505                       | 111.478                         | -0.03865             | -0.14673  | 0.83085 | 0.902338 | no          |
| csbC      | 5.02982                       | 4.89984                         | -0.03777             | -0.12212  | 0.86575 | 0.921788 | no          |
| yfiK      | 1.61409                       | 1.57379                         | -0.03648             | -0.04602  | 0.96125 | 0.972074 | no          |
| trnD-Trp  | 1553.32                       | 1514.64                         | -0.03638             | -0.0714   | 0.90525 | 0.942348 | no          |
| yfjT      | 17.9764                       | 17.5365                         | -0.03574             | -0.04437  | 0.935   | 0.960994 | no          |
| yhaU      | 1.33588                       | 1.30353                         | -0.03537             | -0.07318  | 0.90285 | 0.941951 | no          |
| ykhA      | 9.33649                       | 9.11764                         | -0.03422             | -0.09295  | 0.89465 | 0.938114 | no          |
| yrzA      | 18.6515                       | 18.2186                         | -0.03388             | -0.05051  | 0.94385 | 0.966631 | no          |
| ytaP      | 0.592141                      | 0.578684                        | -0.03317             | -0.04117  | 0.935   | 0.960994 | no          |
| sufA      | 38.0604                       | 37.1992                         | -0.03302             | -0.108    | 0.87545 | 0.926585 | no          |
| yneK      | 18.2199                       | 17.81                           | -0.03282             | -0.09663  | 0.8935  | 0.937434 | no          |
| yabM      | 3.7241                        | 3.64041                         | -0.03279             | -0.0765   | 0.9145  | 0.946961 | no          |
| pspA      | 44.9488                       | 43.9419                         | -0.03269             | -0.13014  | 0.85285 | 0.915505 | no          |
| yrkD      | 39.0191                       | 38.1462                         | -0.03264             | -0.0609   | 0.94965 | 0.968576 | no          |
| yyaB      | 3.15126                       | 3.08283                         | -0.03167             | -0.05267  | 0.9541  | 0.969166 | no          |
| yhjH      | 3.52458                       | 3.4484                          | -0.03153             | -0.06181  | 0.93685 | 0.962101 | no          |
| yxbC      | 34.2651                       | 33.5409                         | -0.03082             | -0.12346  | 0.8628  | 0.920484 | no          |
| yobS      | 1.04727                       | 1.02514                         | -0.0308              | -0.03822  | 0.93005 | 0.957751 | no          |
| trnB-Ile2 | 2621.45                       | 2566.29                         | -0.03068             | -0.0768   | 0.9142  | 0.946913 | no          |
| yjbL      | 26.7256                       | 26.1677                         | -0.03043             | -0.09167  | 0.89635 | 0.939045 | no          |
| glnA      | 259.725                       | 254.321                         | -0.03033             | -0.1082   | 0.8774  | 0.926585 | no          |
| trnJ-Leu2 | 606.216                       | 593.726                         | -0.03003             | -0.05183  | 0.95515 | 0.969166 | no          |
| ytIP      | 8.65455                       | 8.48136                         | -0.02916             | -0.07956  | 0.9069  | 0.943477 | no          |
| yvgN      | 23.2691                       | 22.8113                         | -0.02866             | -0.1113   | 0.87635 | 0.926585 | no          |
| yqbC      | 2.6571                        | 2.60536                         | -0.02837             | -0.05686  | 0.9475  | 0.967807 | no          |
| ynaC      | 4.89667                       | 4.80202                         | -0.02816             | -0.07573  | 0.90745 | 0.943477 | no          |
| yjbA      | 2.45587                       | 2.40888                         | -0.02787             | -0.05807  | 0.9356  | 0.961081 | no          |
| ytcP      | 0.184857                      | 0.181393                        | -0.02729             | 0         | 1       | 1        | no          |
| hemZ      | 3.06572                       | 3.00874                         | -0.02707             | -0.07893  | 0.91745 | 0.948964 | no          |
| yppE      | 5.65081                       | 5.54633                         | -0.02692             | -0.04965  | 0.9614  | 0.972074 | no          |
| yyzF      | 27.1001                       | 26.6013                         | -0.0268              | -0.03582  | 0.93795 | 0.962266 | no          |
| prmC      | 3.16004                       | 3.10534                         | -0.02519             | -0.06121  | 0.92225 | 0.952186 | no          |
| fruA      | 2.04743                       | 2.01225                         | -0.02501             | -0.07071  | 0.9165  | 0.948506 | no          |
| bpr       | 2.02729                       | 1.99275                         | -0.02479             | -0.08778  | 0.89815 | 0.939146 | no          |
| yvcJ      | 11.5554                       | 11.3619                         | -0.02436             | -0.08528  | 0.9022  | 0.941588 | no          |
| ltaSB     | 10.0757                       | 9.90729                         | -0.02432             | -0.09541  | 0.8946  | 0.938114 | no          |

| Table S3  | value_als<br>S High<br>sorted | value_als<br>S Normal<br>sorted | log2(fold<br>change) | test_stat | p_value | q_value  | significant |
|-----------|-------------------------------|---------------------------------|----------------------|-----------|---------|----------|-------------|
| htpK      | 12.0791                       | 11.88                           | -0.02398             | -0.07812  | 0.91185 | 0.946054 | no          |
| fmt       | 10.4252                       | 10.2603                         | -0.023               | -0.05776  | 0.9308  | 0.958259 | no          |
| aadK      | 3.28475                       | 3.23396                         | -0.02248             | -0.05535  | 0.9278  | 0.95649  | no          |
| yfiC      | 1.04635                       | 1.03047                         | -0.02206             | -0.03832  | 0.9581  | 0.970638 | no          |
| yxjS      | 10.4086                       | 10.2526                         | -0.02179             | -0.0405   | 0.9601  | 0.971285 | no          |
| fadR      | 9.32871                       | 9.18911                         | -0.02175             | -0.06177  | 0.929   | 0.957198 | no          |
| rocE      | 6.91235                       | 6.81169                         | -0.02116             | -0.07491  | 0.91395 | 0.946913 | no          |
| sipU      | 6.87667                       | 6.78023                         | -0.02038             | -0.05248  | 0.93445 | 0.960957 | no          |
| rpsU      | 733.291                       | 723.479                         | -0.01943             | -0.07494  | 0.91395 | 0.946913 | no          |
| sppA      | 29.8597                       | 29.4855                         | -0.0182              | -0.07273  | 0.918   | 0.949269 | no          |
| htpX      | 61.1038                       | 60.3479                         | -0.01796             | -0.07275  | 0.91725 | 0.948964 | no          |
| alsS      | 1.71291                       | 1.69193                         | -0.01778             | -0.04646  | 0.9383  | 0.962266 | no          |
| yycC      | 183.744                       | 181.498                         | -0.01774             | -0.03917  | 0.96865 | 0.975705 | no          |
| yrdQ      | 1.98892                       | 1.96483                         | -0.01758             | -0.03653  | 0.9674  | 0.974972 | no          |
| ahpC      | 220.572                       | 217.971                         | -0.01711             | -0.06906  | 0.921   | 0.951318 | no          |
| yhdX      | 38.4852                       | 38.0568                         | -0.01615             | -0.01123  | 0.87545 | 0.926585 | no          |
| ylaF      | 109.216                       | 108.009                         | -0.01603             | -0.04228  | 0.9409  | 0.964668 | no          |
| katE      | 2.40069                       | 2.37423                         | -0.01599             | -0.04822  | 0.9521  | 0.968958 | no          |
| rpml      | 1539.51                       | 1522.6                          | -0.01593             | -0.06451  | 0.92745 | 0.956393 | no          |
| yhgE      | 3.12623                       | 3.09238                         | -0.0157              | -0.05262  | 0.94235 | 0.965615 | no          |
| ywhB      | 42.2268                       | 41.7815                         | -0.0153              | -0.02837  | 0.959   | 0.970638 | no          |
| sbcE      | 1.95975                       | 1.93942                         | -0.01504             | -0.04725  | 0.9417  | 0.965223 | no          |
| trnB-Leu2 | 408.755                       | 404.683                         | -0.01445             | -0.02094  | 0.9426  | 0.965615 | no          |
| yxjL      | 1.06157                       | 1.05102                         | -0.01441             | -0.01497  | 0.9549  | 0.969166 | no          |
| yrrL      | 5.14539                       | 5.09455                         | -0.01433             | -0.04332  | 0.9583  | 0.970638 | no          |
| yjqA      | 9.61227                       | 9.51815                         | -0.0142              | -0.03233  | 0.9723  | 0.976735 | no          |
| ymdB      | 9.23751                       | 9.14753                         | -0.01412             | -0.04479  | 0.9495  | 0.968576 | no          |
| ydch      | 3.83165                       | 3.79436                         | -0.01411             | -0.02197  | 0.96335 | 0.972858 | no          |
| yobQ      | 6.21951                       | 6.15965                         | -0.01395             | -0.03874  | 0.946   | 0.967343 | no          |
| speB      | 8.85711                       | 8.77815                         | -0.01292             | -0.04192  | 0.9505  | 0.968589 | no          |
| ypiA      | 3.37849                       | 3.34846                         | -0.01288             | -0.03669  | 0.95235 | 0.968958 | no          |
| yeeB      | 3.36175                       | 3.33542                         | -0.01134             | -0.03586  | 0.9627  | 0.972858 | no          |
| argJ      | 45.4319                       | 45.0824                         | -0.01114             | -0.04512  | 0.9485  | 0.968206 | no          |
| yvcA      | 7.93009                       | 7.87463                         | -0.01012             | -0.02974  | 0.957   | 0.970515 | no          |
| hisC      | 15.9843                       | 15.8734                         | -0.01005             | -0.03889  | 0.95765 | 0.970638 | no          |
| ypgR      | 13.5924                       | 13.4996                         | -0.00988             | -0.03786  | 0.9541  | 0.969166 | no          |
| ytfI      | 0.372455                      | 0.370095                        | -0.00917             | 0         | 1       | 1        | no          |
| yocS      | 8.49044                       | 8.43742                         | -0.00904             | -0.02995  | 0.97    | 0.976735 | no          |
| cgeD      | 1.10064                       | 1.09494                         | -0.00749             | -0.01507  | 0.965   | 0.973604 | no          |
| yloC      | 19.9398                       | 19.8407                         | -0.00719             | -0.02771  | 0.96865 | 0.975705 | no          |
| nrnA      | 19.1015                       | 19.0083                         | -0.00706             | -0.02737  | 0.9703  | 0.976735 | no          |
| sufC      | 88.2786                       | 87.8937                         | -0.0063              | -0.02561  | 0.9721  | 0.976735 | no          |
| yrzL      | 63.9896                       | 63.7476                         | -0.00547             | -0.01668  | 0.98665 | 0.988073 | no          |
| feuB      | 1.82581                       | 1.82041                         | -0.00427             | -0.00699  | 0.9774  | 0.980815 | no          |

| Table S3 | value_als<br>S High<br>sorted | value_als<br>S Normal<br>sorted | log2(fold<br>change) | test_stat | p_value | q_value  | significant |
|----------|-------------------------------|---------------------------------|----------------------|-----------|---------|----------|-------------|
| nupQ     | 3.89142                       | 3.8805                          | -0.00405             | -0.01094  | 0.98085 | 0.982956 | no          |
| desK     | 1.02193                       | 1.01945                         | -0.00349             | -0.00637  | 0.9592  | 0.970638 | no          |
| yclJ     | 5.73258                       | 5.71879                         | -0.00347             | -0.00738  | 0.9839  | 0.985748 | no          |
| dagK     | 9.11802                       | 9.09692                         | -0.00334             | -0.01106  | 0.99045 | 0.991447 | no          |
| ytkP     | 2.28794                       | 2.28363                         | -0.00272             | -0.00615  | 0.97255 | 0.976735 | no          |
| yqgY     | 162.186                       | 161.888                         | -0.00265             | -0.00962  | 0.99255 | 0.993082 | no          |
| degU     | 65.6531                       | 65.5362                         | -0.00257             | -0.01034  | 0.98675 | 0.988073 | no          |
| hemE     | 9.55069                       | 9.54042                         | -0.00155             | -0.00548  | 0.99065 | 0.991447 | no          |
| yhfW     | 0.199807                      | 0.199659                        | -0.00107             | 0         | 1       | 1        | no          |
| dnaK     | 68.57                         | 68.5664                         | -7.52E-05            | -0.0003   | 0.999   | 0.999    | no          |
| yqgO     | 13.5894                       | 13.6048                         | 0.001637             | 0.001594  | 0.91265 | 0.946621 | no          |
| yclO     | 24.4356                       | 24.4687                         | 0.001954             | 0.00482   | 0.99455 | 0.994816 | no          |
| copA     | 1.24361                       | 1.24546                         | 0.002144             | 0.005717  | 0.9789  | 0.981792 | no          |
| yjgD     | 1.05469                       | 1.05657                         | 0.002571             | 0.002231  | 0.9515  | 0.968885 | no          |
| yoZS     | 14.9207                       | 14.9514                         | 0.002968             | 0.006516  | 0.97145 | 0.976735 | no          |
| yncE     | 4.35304                       | 4.36672                         | 0.004528             | 0.008853  | 0.96345 | 0.972858 | no          |
| fra      | 5.03724                       | 5.05377                         | 0.004726             | 0.008312  | 0.9587  | 0.970638 | no          |
| yvcB     | 8.75825                       | 8.78798                         | 0.004889             | 0.019014  | 0.97825 | 0.981404 | no          |
| yqeW     | 0.506165                      | 0.508042                        | 0.005341             | 0         | 1       | 1        | no          |
| zur      | 6.56755                       | 6.59354                         | 0.005697             | 0.012299  | 0.9712  | 0.976735 | no          |
| ytkA     | 11.6032                       | 11.6553                         | 0.006472             | 0.016433  | 0.9796  | 0.982231 | no          |
| trnJ-Gly | 1051.54                       | 1056.54                         | 0.006845             | 0.01194   | 0.9591  | 0.970638 | no          |
| menF     | 6.58242                       | 6.61418                         | 0.006942             | 0.016876  | 0.9805  | 0.982869 | no          |
| tilS     | 13.2146                       | 13.2815                         | 0.007282             | 0.022211  | 0.97295 | 0.976874 | no          |
| gmk      | 41.4411                       | 41.671                          | 0.007981             | 0.0314    | 0.9632  | 0.972858 | no          |
| ytcA     | 0.152353                      | 0.153211                        | 0.008111             | 0         | 1       | 1        | no          |
| sufD     | 79.9144                       | 80.4145                         | 0.009001             | 0.02454   | 0.97195 | 0.976735 | no          |
| yizD     | 7.00901                       | 7.05471                         | 0.009376             | 0.005906  | 0.8672  | 0.92218  | no          |
| cotD     | 38.8654                       | 39.1201                         | 0.009421             | 0.021787  | 0.97065 | 0.976735 | no          |
| yvaM     | 1.09349                       | 1.1011                          | 0.010006             | 0.015484  | 0.94785 | 0.967807 | no          |
| yocH     | 20.3737                       | 20.5282                         | 0.0109               | 0.042089  | 0.95345 | 0.969166 | no          |
| tatAC    | 33.8365                       | 34.1026                         | 0.011303             | 0.019576  | 0.9587  | 0.970638 | no          |
| ktrC     | 21.3257                       | 21.494                          | 0.011341             | 0.041833  | 0.95335 | 0.969166 | no          |
| oppA     | 35.8355                       | 36.1313                         | 0.011859             | 0.048213  | 0.9448  | 0.967073 | no          |
| trnD-Asp | 8174.84                       | 8242.61                         | 0.011912             | 0.039929  | 0.9505  | 0.968589 | no          |
| ytxH     | 75.1357                       | 75.7741                         | 0.012206             | 0.04835   | 0.9461  | 0.967343 | no          |
| oppD     | 20.2256                       | 20.3989                         | 0.012306             | 0.04855   | 0.94685 | 0.96758  | no          |
| yndA     | 1.0164                        | 1.02546                         | 0.012802             | 0.01106   | 0.90495 | 0.942299 | no          |
| cdoA     | 0.70505                       | 0.711404                        | 0.012943             | 0.011182  | 0.90495 | 0.942299 | no          |
| yrrB     | 4.43476                       | 4.4766                          | 0.013548             | 0.031605  | 0.97485 | 0.978519 | no          |
| ydcG     | 2.22223                       | 2.24324                         | 0.013576             | 0.014977  | 0.95505 | 0.969166 | no          |
| yhjG     | 0.94842                       | 0.957797                        | 0.014194             | 0.02883   | 0.964   | 0.972858 | no          |
| yheB     | 2.96401                       | 2.99383                         | 0.014444             | 0.038633  | 0.94785 | 0.967807 | no          |
| ylaE     | 5.37065                       | 5.4263                          | 0.014873             | 0.037143  | 0.9725  | 0.976735 | no          |

| Table S3 | value_als<br>S High<br>sorted | value_als<br>S Normal<br>sorted | log2(fold<br>change) | test_stat | p_value | q_value  | significant |
|----------|-------------------------------|---------------------------------|----------------------|-----------|---------|----------|-------------|
| ykwB     | 6.93127                       | 7.00525                         | 0.015317             | 0.042914  | 0.94515 | 0.967166 | no          |
| dnaX     | 6.21538                       | 6.28235                         | 0.015461             | 0.056107  | 0.93745 | 0.962266 | no          |
| gutR     | 1.44862                       | 1.46429                         | 0.01552              | 0.043265  | 0.94685 | 0.96758  | no          |
| vmlR     | 1.52639                       | 1.54332                         | 0.015914             | 0.039615  | 0.9636  | 0.972858 | no          |
| tagO     | 16.7701                       | 16.9651                         | 0.016676             | 0.06495   | 0.9262  | 0.955632 | no          |
| ywtG     | 2.23815                       | 2.2646                          | 0.016954             | 0.044698  | 0.938   | 0.962266 | no          |
| yrbC     | 1.38636                       | 1.40304                         | 0.017253             | 0.028389  | 0.95095 | 0.968589 | no          |
| cotH     | 0.191281                      | 0.193622                        | 0.017547             | 0         | 1       | 1        | no          |
| yjzE     | 17.6306                       | 17.8471                         | 0.017607             | 0.034843  | 0.96565 | 0.973997 | no          |
| hemN     | 4.64252                       | 4.70589                         | 0.019562             | 0.058799  | 0.9313  | 0.95851  | no          |
| yvpB     | 2.96126                       | 3.00239                         | 0.019898             | 0.044811  | 0.96675 | 0.974782 | no          |
| ywmC     | 0.297915                      | 0.302202                        | 0.02061              | 0         | 1       | 1        | no          |
| ypjQ     | 44.506                        | 45.15                           | 0.020725             | 0.080758  | 0.90765 | 0.943477 | no          |
| iolG     | 0.882631                      | 0.895548                        | 0.020961             | 0.034646  | 0.9521  | 0.968958 | no          |
| argC     | 24.8277                       | 25.211                          | 0.022103             | 0.087994  | 0.90195 | 0.941588 | no          |
| pyrK     | 51.784                        | 52.5889                         | 0.022253             | 0.023437  | 0.97235 | 0.976735 | no          |
| rplI     | 20.7659                       | 21.0899                         | 0.022337             | 0.039502  | 0.9535  | 0.969166 | no          |
| mrpF     | 38.6199                       | 39.2253                         | 0.022443             | 0.040778  | 0.95455 | 0.969166 | no          |
| yfmF     | 24.9579                       | 25.3692                         | 0.023578             | 0.091926  | 0.89715 | 0.939045 | no          |
| mutS     | 4.32035                       | 4.39179                         | 0.023659             | 0.087408  | 0.89975 | 0.939767 | no          |
| yvmC     | 14.2908                       | 14.5344                         | 0.024393             | 0.085371  | 0.90445 | 0.942299 | no          |
| ywcD     | 8.31814                       | 8.46801                         | 0.025761             | 0.056262  | 0.9294  | 0.957346 | no          |
| scuA     | 13.2847                       | 13.5255                         | 0.025911             | 0.080394  | 0.90965 | 0.944559 | no          |
| dltA     | 30.1413                       | 30.6883                         | 0.025947             | 0.076935  | 0.9113  | 0.946009 | no          |
| -        | 237.634                       | 242.031                         | 0.02645              | 0.074516  | 0.91335 | 0.946913 | no          |
| yhdA     | 6.34676                       | 6.4674                          | 0.027167             | 0.039656  | 0.956   | 0.969765 | no          |
| gerAC    | 1.65975                       | 1.69192                         | 0.027699             | 0.052415  | 0.929   | 0.957198 | no          |
| ybxG     | 28.5963                       | 29.1525                         | 0.027791             | 0.112007  | 0.8731  | 0.925392 | no          |
| yvcD     | 5.13118                       | 5.23304                         | 0.028361             | 0.094309  | 0.8931  | 0.937278 | no          |
| pyrD     | 37.484                        | 38.2336                         | 0.028566             | 0.02999   | 0.96695 | 0.974782 | no          |
| uvrA     | 7.53532                       | 7.68621                         | 0.028604             | 0.113746  | 0.8777  | 0.926585 | no          |
| rlmCD    | 2.55911                       | 2.61111                         | 0.029026             | 0.079561  | 0.90465 | 0.942299 | no          |
| uvrB     | 4.25714                       | 4.34517                         | 0.029529             | 0.102822  | 0.88105 | 0.928495 | no          |
| galM     | 5.66804                       | 5.78947                         | 0.030583             | 0.092378  | 0.899   | 0.939507 | no          |
| xkdM     | 8.31109                       | 8.49192                         | 0.031054             | 0.075206  | 0.92235 | 0.952185 | no          |
| ygaD     | 3.54824                       | 3.62723                         | 0.031766             | 0.101138  | 0.8832  | 0.930025 | no          |
| iscSA    | 13.3896                       | 13.6885                         | 0.031854             | 0.12211   | 0.8613  | 0.919672 | no          |
| yqhR     | 0.27282                       | 0.27897                         | 0.032159             | 0         | 1       | 1        | no          |
| ykoT     | 0.112514                      | 0.115055                        | 0.032217             | 0         | 1       | 1        | no          |
| yabQ     | 12.6236                       | 12.9182                         | 0.033282             | 0.097249  | 0.8909  | 0.935863 | no          |
| yfkS     | 7.11698                       | 7.28408                         | 0.033482             | 0.031047  | 0.90455 | 0.942299 | no          |
| ynaB     | 12.6122                       | 12.9085                         | 0.033504             | 0.09121   | 0.8987  | 0.939459 | no          |
| yqeH     | 15.1174                       | 15.4762                         | 0.033836             | 0.130649  | 0.85155 | 0.915018 | no          |
| sdaAB    | 6.39031                       | 6.54278                         | 0.034017             | 0.092049  | 0.89755 | 0.939045 | no          |

| Table S3  | value_als<br>S High<br>sorted | value_als<br>S Normal<br>sorted | log2(fold<br>change) | test_stat | p_value | q_value  | significant |
|-----------|-------------------------------|---------------------------------|----------------------|-----------|---------|----------|-------------|
| ykul      | 12.1654                       | 12.4571                         | 0.034189             | 0.130725  | 0.8501  | 0.914099 | no          |
| yaaK      | 56.8446                       | 58.2084                         | 0.034203             | 0.116062  | 0.86795 | 0.922289 | no          |
| yrhK      | 2.27683                       | 2.33222                         | 0.03468              | 0.032157  | 0.90455 | 0.942299 | no          |
| dapX      | 17.6985                       | 18.1358                         | 0.035215             | 0.138833  | 0.8436  | 0.910669 | no          |
| yclG      | 0.137247                      | 0.140653                        | 0.035368             | 0         | 1       | 1        | no          |
| ymfl      | 2.25402                       | 2.31                            | 0.035394             | 0.071203  | 0.90785 | 0.943477 | no          |
| yfkT      | 2.56549                       | 2.62991                         | 0.035777             | 0.053773  | 0.93825 | 0.962266 | no          |
| yvzB      | 1.56453                       | 1.60432                         | 0.036227             | 0.047824  | 0.9353  | 0.961037 | no          |
| smpB      | 15.1628                       | 15.5488                         | 0.036265             | 0.106875  | 0.88575 | 0.931659 | no          |
| murAA     | 27.666                        | 28.3813                         | 0.03683              | 0.147992  | 0.83105 | 0.902338 | no          |
| ygaK      | 1.51536                       | 1.55472                         | 0.036997             | 0.085302  | 0.91395 | 0.946913 | no          |
| ytpA      | 12.9852                       | 13.3286                         | 0.037656             | 0.130803  | 0.8504  | 0.914099 | no          |
| trnB-Met3 | 675.972                       | 693.979                         | 0.037928             | 0.057882  | 0.94945 | 0.968576 | no          |
| ylmG      | 62.796                        | 64.4709                         | 0.037976             | 0.11778   | 0.86545 | 0.921731 | no          |
| yczE      | 3.52217                       | 3.6171                          | 0.038368             | 0.084867  | 0.90925 | 0.944406 | no          |
| levF      | 2.11105                       | 2.16949                         | 0.039396             | 0.081325  | 0.8964  | 0.939045 | no          |
| yknX      | 50.7616                       | 52.1834                         | 0.039853             | 0.161552  | 0.82195 | 0.894538 | no          |
| mobB      | 11.6834                       | 12.0171                         | 0.040621             | 0.083329  | 0.90225 | 0.941588 | no          |
| yutE      | 18.9089                       | 19.4517                         | 0.040832             | 0.123293  | 0.86245 | 0.920374 | no          |
| trnB-Ser2 | 394.741                       | 406.124                         | 0.041016             | 0.06504   | 0.9499  | 0.968576 | no          |
| ysgA      | 3.86409                       | 3.9758                          | 0.041116             | 0.101086  | 0.88125 | 0.928495 | no          |
| lonA      | 10.193                        | 10.4964                         | 0.042319             | 0.13842   | 0.8409  | 0.909082 | no          |
| ygaF      | 13.7152                       | 14.1237                         | 0.042349             | 0.122316  | 0.86345 | 0.920549 | no          |
| ycbD      | 0.130669                      | 0.134649                        | 0.043278             | 0         | 1       | 1        | no          |
| trmL      | 13.043                        | 13.4414                         | 0.043401             | 0.124987  | 0.8544  | 0.915505 | no          |
| yyzO      | 10.7381                       | 11.0661                         | 0.043405             | 0.030903  | 0.94425 | 0.966775 | no          |
| ppiB      | 40.9237                       | 42.1829                         | 0.043724             | 0.159088  | 0.8169  | 0.891611 | no          |
| sdpB      | 172.18                        | 177.493                         | 0.043843             | 0.140411  | 0.83585 | 0.905343 | no          |
| spoVAEB   | 0.436425                      | 0.449983                        | 0.044134             | 0         | 1       | 1        | no          |
| trpA      | 26.4597                       | 27.2879                         | 0.044469             | 0.118015  | 0.8675  | 0.92218  | no          |
| glcT      | 9.42773                       | 9.7229                          | 0.044477             | 0.146509  | 0.8347  | 0.904723 | no          |
| yisS      | 0.967942                      | 0.998446                        | 0.044764             | 0.077092  | 0.9184  | 0.94942  | no          |
| yobB      | 28.262                        | 29.1566                         | 0.044961             | 0.109014  | 0.8717  | 0.924276 | no          |
| cueR      | 35.8138                       | 36.966                          | 0.045685             | 0.162037  | 0.81475 | 0.89039  | no          |
| yclK      | 3.24115                       | 3.34546                         | 0.045702             | 0.117244  | 0.86955 | 0.922939 | no          |
| lipC      | 4.36143                       | 4.50342                         | 0.046218             | 0.11005   | 0.8747  | 0.926562 | no          |
| fhuG      | 7.58243                       | 7.8305                          | 0.046444             | 0.12794   | 0.8547  | 0.915505 | no          |
| ydzW      | 32.2456                       | 33.3011                         | 0.046471             | 0.076784  | 0.89925 | 0.939507 | no          |
| asnS      | 35.4034                       | 36.5735                         | 0.046911             | 0.190166  | 0.78075 | 0.869207 | no          |
| citB      | 79.8575                       | 82.5599                         | 0.048014             | 0.174759  | 0.80115 | 0.880628 | no          |
| hemD      | 11.3333                       | 11.7176                         | 0.048111             | 0.097887  | 0.8851  | 0.9315   | no          |
| yacD      | 6.5512                        | 6.78226                         | 0.050006             | 0.152279  | 0.836   | 0.905343 | no          |
| yozB      | 22.4759                       | 23.2853                         | 0.051042             | 0.177562  | 0.7979  | 0.878867 | no          |
| speE      | 10.9636                       | 11.3653                         | 0.051913             | 0.17659   | 0.8007  | 0.880628 | no          |



| Table S3   | value_als<br>S High<br>sorted | value_als<br>S Normal<br>sorted | log2(fold<br>change) | test_stat | p_value | q_value  | significant |
|------------|-------------------------------|---------------------------------|----------------------|-----------|---------|----------|-------------|
| yfjQ       | 4.45388                       | 4.61831                         | 0.052302             | 0.14764   | 0.8324  | 0.903016 | no          |
| yqfO       | 10.2942                       | 10.6771                         | 0.052686             | 0.158662  | 0.8199  | 0.892991 | no          |
| yxiT       | 3.83571                       | 3.97866                         | 0.052787             | 0.094775  | 0.88055 | 0.928334 | no          |
| folN       | 6.31164                       | 6.54861                         | 0.053174             | 0.134621  | 0.8452  | 0.911557 | no          |
| tagF       | 8.66955                       | 8.99604                         | 0.053333             | 0.147699  | 0.83435 | 0.904606 | no          |
| menH       | 8.01733                       | 8.32974                         | 0.055149             | 0.108261  | 0.87555 | 0.926585 | no          |
| ywqF       | 4.30747                       | 4.47797                         | 0.056005             | 0.172495  | 0.80175 | 0.880879 | no          |
| pyrG       | 13.1737                       | 13.6992                         | 0.05644              | 0.223424  | 0.75105 | 0.851631 | no          |
| yjcD       | 0.985915                      | 1.0253                          | 0.056505             | 0.138067  | 0.8414  | 0.909082 | no          |
| ytxG       | 58.7443                       | 61.1191                         | 0.057174             | 0.220387  | 0.7523  | 0.851748 | no          |
| yefB       | 0.968193                      | 1.00744                         | 0.057321             | 0.085247  | 0.8968  | 0.939045 | no          |
| yvcT       | 18.2768                       | 19.02                           | 0.057506             | 0.223139  | 0.75215 | 0.851748 | no          |
| ggaA       | 6.17955                       | 6.43236                         | 0.057846             | 0.19792   | 0.77655 | 0.865974 | no          |
| panC       | 22.8432                       | 23.7843                         | 0.058243             | 0.227407  | 0.74535 | 0.847226 | no          |
| yfhK       | 15.7896                       | 16.449                          | 0.059022             | 0.184513  | 0.7934  | 0.876236 | no          |
| rsbRD      | 3.13808                       | 3.26942                         | 0.059152             | 0.143284  | 0.84245 | 0.909953 | no          |
| dynA       | 2.37551                       | 2.47579                         | 0.059649             | 0.210942  | 0.7711  | 0.863543 | no          |
| spoVS      | 108.825                       | 113.423                         | 0.059702             | 0.207517  | 0.7673  | 0.860636 | no          |
| ysmA       | 4.47944                       | 4.66902                         | 0.059803             | 0.116076  | 0.87665 | 0.926585 | no          |
| ysxC       | 25.0626                       | 26.1456                         | 0.061034             | 0.127219  | 0.85945 | 0.919011 | no          |
| pit        | 6.56925                       | 6.85558                         | 0.06155              | 0.193266  | 0.78685 | 0.873914 | no          |
| rsbRC      | 4.17597                       | 4.35967                         | 0.062108             | 0.16561   | 0.8039  | 0.882352 | no          |
| rsbP       | 3.75582                       | 3.92145                         | 0.062259             | 0.180834  | 0.79715 | 0.878559 | no          |
| zwf        | 33.4246                       | 34.9019                         | 0.062395             | 0.252783  | 0.7125  | 0.821618 | no          |
| sigB       | 25.8019                       | 26.9509                         | 0.062855             | 0.122016  | 0.86095 | 0.919562 | no          |
| ydzW       | 8.88301                       | 9.27937                         | 0.06298              | 0.075788  | 0.90775 | 0.943477 | no          |
| ycbL       | 1.3263                        | 1.38555                         | 0.06305              | 0.098288  | 0.8777  | 0.926585 | no          |
| ypsC       | 6.56638                       | 6.86329                         | 0.063802             | 0.21133   | 0.7715  | 0.863543 | no          |
| sdpA       | 166.756                       | 174.374                         | 0.06444              | 0.119552  | 0.86345 | 0.920549 | no          |
| gcvPB      | 12.1285                       | 12.6841                         | 0.064619             | 0.179141  | 0.79215 | 0.875374 | no          |
| recG       | 3.82461                       | 4.00136                         | 0.065176             | 0.190298  | 0.7878  | 0.874449 | no          |
| ywcC       | 2.15718                       | 2.25714                         | 0.065353             | 0.123096  | 0.87095 | 0.924162 | no          |
| trnSL-Ser1 | 1909.46                       | 1998                            | 0.065395             | 0.187077  | 0.7913  | 0.875212 | no          |
| rnpZA      | 144.681                       | 151.421                         | 0.065692             | 0.204386  | 0.77385 | 0.865101 | no          |
| ykoM       | 7.05088                       | 7.3796                          | 0.065739             | 0.155145  | 0.8211  | 0.893874 | no          |
| yusT       | 0.786427                      | 0.823137                        | 0.06582              | 0.095037  | 0.8967  | 0.939045 | no          |
| ydcI       | 3.42114                       | 3.58223                         | 0.066381             | 0.224387  | 0.75785 | 0.854412 | no          |
| mntR       | 27.1004                       | 28.3775                         | 0.066429             | 0.218933  | 0.76245 | 0.857785 | no          |
| phy        | 0.491527                      | 0.515008                        | 0.067324             | 0.090942  | 0.915   | 0.947217 | no          |
| ycdA       | 25.6336                       | 26.8592                         | 0.067381             | 0.268306  | 0.70115 | 0.811309 | no          |
| pyrF       | 51.4584                       | 53.9353                         | 0.067824             | 0.06863   | 0.91945 | 0.950243 | no          |
| yycS       | 2.27943                       | 2.39245                         | 0.069819             | 0.095768  | 0.90745 | 0.943477 | no          |
| accD       | 31.7326                       | 33.3228                         | 0.070544             | 0.187072  | 0.7882  | 0.874633 | no          |
| ycgE       | 2.26757                       | 2.38313                         | 0.071709             | 0.108648  | 0.85985 | 0.919019 | no          |

| Table S3   | value_als<br>S High<br>sorted | value_als<br>S Normal<br>sorted | log2(fold<br>change) | test_stat | p_value | q_value  | significant |
|------------|-------------------------------|---------------------------------|----------------------|-----------|---------|----------|-------------|
| rbn        | 4.60107                       | 4.83738                         | 0.072258             | 0.196457  | 0.77405 | 0.865101 | no          |
| ntdA       | 2.11703                       | 2.22687                         | 0.072975             | 0.168738  | 0.8025  | 0.881334 | no          |
| lcfA       | 2.84318                       | 2.99143                         | 0.073333             | 0.217923  | 0.75875 | 0.854878 | no          |
| csn        | 19.3378                       | 20.3508                         | 0.073661             | 0.282028  | 0.67755 | 0.794882 | no          |
| yabD       | 7.56433                       | 7.96261                         | 0.074029             | 0.219862  | 0.75245 | 0.851748 | no          |
| yfmO       | 0.778555                      | 0.819597                        | 0.074116             | 0.125898  | 0.85995 | 0.919019 | no          |
| trnI-Gly   | 1237.79                       | 1304.64                         | 0.075885             | 0.1441    | 0.83495 | 0.904731 | no          |
| rpmEB      | 16.1014                       | 16.9718                         | 0.07595              | 0.140016  | 0.84135 | 0.909082 | no          |
| glgB       | 0.364637                      | 0.384657                        | 0.077111             | 0         | 1       | 1        | no          |
| ytsP       | 9.99618                       | 10.545                          | 0.077115             | 0.208923  | 0.76165 | 0.857143 | no          |
| trnSL-Ala1 | 726.594                       | 766.598                         | 0.077321             | 0.109215  | 0.8649  | 0.921462 | no          |
| fhuB       | 4.58769                       | 4.84078                         | 0.07747              | 0.18031   | 0.80105 | 0.880628 | no          |
| gabP       | 11.7179                       | 12.3694                         | 0.078066             | 0.302393  | 0.6694  | 0.788983 | no          |
| yoaE       | 9.54779                       | 10.0792                         | 0.078143             | 0.308574  | 0.65905 | 0.78074  | no          |
| ywjA       | 10.2163                       | 10.7855                         | 0.078226             | 0.306474  | 0.65715 | 0.778984 | no          |
| hom        | 90.4399                       | 95.5472                         | 0.079254             | 0.198022  | 0.77365 | 0.865101 | no          |
| hepA       | 3.18556                       | 3.36694                         | 0.079892             | 0.261494  | 0.7142  | 0.822839 | no          |
| pksB       | 5.5032                        | 5.81675                         | 0.079944             | 0.211719  | 0.7667  | 0.860492 | no          |
| pyrE       | 50.3863                       | 53.2597                         | 0.080012             | 0.076798  | 0.90865 | 0.944045 | no          |
| ydiF       | 2.52882                       | 2.67421                         | 0.08065              | 0.242858  | 0.7315  | 0.836064 | no          |
| coaE       | 6.58319                       | 6.96221                         | 0.080759             | 0.21179   | 0.7645  | 0.859315 | no          |
| ytsJ       | 12.713                        | 13.4463                         | 0.080894             | 0.311521  | 0.65585 | 0.778184 | no          |
| yfjO       | 1.82855                       | 1.93406                         | 0.080935             | 0.203025  | 0.77715 | 0.865974 | no          |
| ydbD       | 1.16491                       | 1.23219                         | 0.081006             | 0.134186  | 0.8546  | 0.915505 | no          |
| sigA       | 58.3584                       | 61.7342                         | 0.081128             | 0.329295  | 0.63405 | 0.760779 | no          |
| thiE       | 7.45422                       | 7.88585                         | 0.081209             | 0.211117  | 0.76695 | 0.860514 | no          |
| yvrC       | 11.0903                       | 11.7327                         | 0.08124              | 0.242208  | 0.72275 | 0.829618 | no          |
| yrzR       | 4.75328                       | 5.02876                         | 0.081278             | 0.056525  | 0.8769  | 0.926585 | no          |
| yjbB       | 1.08755                       | 1.15064                         | 0.081357             | 0.158409  | 0.8198  | 0.892991 | no          |
| yjcG       | 59.7841                       | 63.2915                         | 0.08225              | 0.325848  | 0.6419  | 0.766748 | no          |
| ydgJ       | 1.97575                       | 2.09218                         | 0.082609             | 0.124149  | 0.84425 | 0.911107 | no          |
| ydaG       | 33.5683                       | 35.5486                         | 0.082691             | 0.28719   | 0.683   | 0.797824 | no          |
| spoIVFB    | 0.647703                      | 0.685929                        | 0.082728             | 0.105712  | 0.89055 | 0.935863 | no          |
| nrdF       | 18.5726                       | 19.6773                         | 0.083358             | 0.324861  | 0.6432  | 0.767564 | no          |
| yoaS       | 1.82791                       | 1.93693                         | 0.083574             | 0.119516  | 0.85015 | 0.914099 | no          |
| tuaE       | 0.560521                      | 0.594021                        | 0.083745             | 0.136574  | 0.84845 | 0.913527 | no          |
| walH       | 5.59992                       | 5.9346                          | 0.083746             | 0.184019  | 0.78995 | 0.874755 | no          |
| fmnP       | 6.65114                       | 7.04905                         | 0.083828             | 0.218761  | 0.75685 | 0.853655 | no          |
| alsT       | 12.6247                       | 13.3884                         | 0.084737             | 0.331131  | 0.63635 | 0.763048 | no          |
| yyaP       | 2.79007                       | 2.95942                         | 0.085009             | 0.161892  | 0.81165 | 0.888769 | no          |
| phoH       | 16.0363                       | 17.0123                         | 0.085234             | 0.313167  | 0.662   | 0.782993 | no          |
| rapG       | 19.8098                       | 21.0187                         | 0.085463             | 0.337137  | 0.62575 | 0.754456 | no          |
| cstA       | 2.08358                       | 2.21087                         | 0.085551             | 0.241058  | 0.73265 | 0.83698  | no          |
| yvKB       | 2.16417                       | 2.29662                         | 0.085693             | 0.147456  | 0.8399  | 0.908993 | no          |

| Table S3   | value_als<br>S High<br>sorted | value_als<br>S Normal<br>sorted | log2(fold<br>change) | test_stat | p_value | q_value  | significant |
|------------|-------------------------------|---------------------------------|----------------------|-----------|---------|----------|-------------|
| ywoB       | 1.78847                       | 1.89792                         | 0.085699             | 0.108132  | 0.86915 | 0.922777 | no          |
| ycsD       | 13.1242                       | 13.9278                         | 0.08573              | 0.224284  | 0.74315 | 0.84524  | no          |
| nprE       | 1.88477                       | 2.0002                          | 0.085756             | 0.225775  | 0.7506  | 0.851379 | no          |
| hbs        | 779.373                       | 827.331                         | 0.086151             | 0.348736  | 0.6163  | 0.749597 | no          |
| rtp        | 4.0076                        | 4.25601                         | 0.086762             | 0.137613  | 0.8473  | 0.913342 | no          |
| yvyI       | 4.53646                       | 4.81886                         | 0.087124             | 0.245862  | 0.7247  | 0.831007 | no          |
| cypB       | 2.18431                       | 2.32031                         | 0.087138             | 0.291221  | 0.67845 | 0.795145 | no          |
| ydzW       | 39.6879                       | 42.1818                         | 0.087918             | 0.107433  | 0.89005 | 0.935863 | no          |
| yhjE       | 4.9291                        | 5.23945                         | 0.088091             | 0.217006  | 0.75435 | 0.85238  | no          |
| trnSL-Val2 | 16670                         | 17724.6                         | 0.088497             | 0.313329  | 0.65385 | 0.77667  | no          |
| yobW       | 0.48078                       | 0.511339                        | 0.088905             | 0.072762  | 0.8951  | 0.938322 | no          |
| mobA       | 4.06749                       | 4.32629                         | 0.088989             | 0.201388  | 0.7733  | 0.865101 | no          |
| spsI       | 0.306758                      | 0.326283                        | 0.08902              | 0         | 1       | 1        | no          |
| coxA       | 3.49247                       | 3.71554                         | 0.089327             | 0.190174  | 0.78905 | 0.874755 | no          |
| miaB       | 9.62365                       | 10.2389                         | 0.089407             | 0.342528  | 0.62155 | 0.752063 | no          |
| mnaA       | 3.02813                       | 3.22211                         | 0.08958              | 0.242466  | 0.7278  | 0.832855 | no          |
| mtnW       | 21.9824                       | 23.4132                         | 0.090973             | 0.224939  | 0.74095 | 0.843251 | no          |
| tetL       | 175.234                       | 186.68                          | 0.091287             | 0.063872  | 0.8528  | 0.915505 | no          |
| mnmA       | 17.8488                       | 19.0263                         | 0.092168             | 0.362403  | 0.59845 | 0.736469 | no          |
| ywqB       | 1.78753                       | 1.90607                         | 0.09263              | 0.166008  | 0.8148  | 0.89039  | no          |
| yerB       | 26.5798                       | 28.3447                         | 0.092745             | 0.368904  | 0.6043  | 0.74055  | no          |
| yfjR       | 2.99075                       | 3.19206                         | 0.093981             | 0.225735  | 0.75275 | 0.851748 | no          |
| yqgM       | 0.807636                      | 0.862171                        | 0.094269             | 0.133226  | 0.85855 | 0.918312 | no          |
| desR       | 2.29616                       | 2.45148                         | 0.094431             | 0.172994  | 0.8058  | 0.883838 | no          |
| yyaL       | 3.3881                        | 3.61735                         | 0.094458             | 0.221778  | 0.7447  | 0.846745 | no          |
| ywdI       | 8.84444                       | 9.44569                         | 0.094885             | 0.182751  | 0.7975  | 0.878685 | no          |
| yfhl       | 0.763055                      | 0.815706                        | 0.096261             | 0.163904  | 0.8071  | 0.884565 | no          |
| ycdG       | 1.29266                       | 1.3821                          | 0.096511             | 0.231104  | 0.74825 | 0.849488 | no          |
| yybB       | 3.61519                       | 3.8659                          | 0.09673              | 0.221149  | 0.7522  | 0.851748 | no          |
| yutI       | 99.0009                       | 105.896                         | 0.097133             | 0.37613   | 0.592   | 0.731056 | no          |
| bkdB       | 8.0071                        | 8.57439                         | 0.098754             | 0.355978  | 0.6082  | 0.743621 | no          |
| ureB       | 5.95623                       | 6.37992                         | 0.099141             | 0.109644  | 0.8718  | 0.924276 | no          |
| yneN       | 14.751                        | 15.8029                         | 0.09938              | 0.303781  | 0.6696  | 0.788983 | no          |
| rimP       | 40.3421                       | 43.2432                         | 0.100188             | 0.378192  | 0.5862  | 0.726235 | no          |
| ytxC       | 5.75605                       | 6.17001                         | 0.100193             | 0.290045  | 0.68075 | 0.796458 | no          |
| cotJB      | 0.612129                      | 0.656516                        | 0.100995             | 0.053901  | 0.50845 | 0.659678 | no          |
| yqxA       | 0.315426                      | 0.338497                        | 0.10184              | 0         | 1       | 1        | no          |
| glxK       | 2.61846                       | 2.81005                         | 0.101874             | 0.26596   | 0.6975  | 0.808724 | no          |
| yutG       | 0.145584                      | 0.15629                         | 0.102373             | 0         | 1       | 1        | no          |
| yqfQ       | 0.080279                      | 0.086195                        | 0.102581             | 0         | 1       | 1        | no          |
| iolE       | 0.440101                      | 0.472542                        | 0.102609             | 0         | 1       | 1        | no          |
| citM       | 0.237285                      | 0.254779                        | 0.102629             | 0         | 1       | 1        | no          |
| gsaB       | 8.54436                       | 9.17717                         | 0.103075             | 0.377171  | 0.587   | 0.726502 | no          |
| trmK       | 14.4404                       | 15.5101                         | 0.103095             | 0.257779  | 0.7184  | 0.825895 | no          |

| Table S3 | value_als<br>S High<br>sorted | value_als<br>S Normal<br>sorted | log2(fold<br>change) | test_stat | p_value | q_value  | significant |
|----------|-------------------------------|---------------------------------|----------------------|-----------|---------|----------|-------------|
| yjqC     | 2.28161                       | 2.45151                         | 0.103617             | 0.224346  | 0.7539  | 0.85238  | no          |
| yvoF     | 19.5927                       | 21.0534                         | 0.103739             | 0.34433   | 0.62555 | 0.754456 | no          |
| yoZC     | 42.4246                       | 45.5927                         | 0.103902             | 0.21873   | 0.7544  | 0.85238  | no          |
| engA     | 16.1415                       | 17.3528                         | 0.10439              | 0.412025  | 0.5524  | 0.698024 | no          |
| ygzD     | 16.5692                       | 17.82                           | 0.104991             | 0.146981  | 0.82685 | 0.899248 | no          |
| panD     | 15.5611                       | 16.7547                         | 0.106619             | 0.289948  | 0.6833  | 0.797824 | no          |
| ykuS     | 50.4444                       | 54.3618                         | 0.107898             | 0.292825  | 0.6727  | 0.791387 | no          |
| yjcO     | 2.79609                       | 3.01341                         | 0.107983             | 0.179662  | 0.79185 | 0.875374 | no          |
| ohrR     | 3.1661                        | 3.41389                         | 0.108711             | 0.185449  | 0.79625 | 0.878345 | no          |
| ycdF     | 2.04308                       | 2.20322                         | 0.108872             | 0.220543  | 0.75695 | 0.853655 | no          |
| yycN     | 2.41118                       | 2.60076                         | 0.109198             | 0.173873  | 0.80275 | 0.881349 | no          |
| citZ     | 108.64                        | 117.192                         | 0.109319             | 0.434638  | 0.5369  | 0.685396 | no          |
| ygxA     | 8.5422                        | 9.21717                         | 0.109717             | 0.358453  | 0.61535 | 0.749174 | no          |
| spolIIE  | 5.243                         | 5.66119                         | 0.110711             | 0.420537  | 0.54945 | 0.6956   | no          |
| ddl      | 9.72918                       | 10.5054                         | 0.110743             | 0.396453  | 0.5701  | 0.714107 | no          |
| yitL     | 7.22405                       | 7.80063                         | 0.110782             | 0.346697  | 0.62415 | 0.7535   | no          |
| kdgT     | 1.65001                       | 1.78202                         | 0.111104             | 0.232708  | 0.74205 | 0.844246 | no          |
| yhcK     | 4.3355                        | 4.68327                         | 0.111318             | 0.323632  | 0.6495  | 0.773846 | no          |
| ycsA     | 1.77949                       | 1.92308                         | 0.111949             | 0.249015  | 0.727   | 0.832705 | no          |
| yhbE     | 3.37389                       | 3.64989                         | 0.113438             | 0.232034  | 0.73905 | 0.842116 | no          |
| ylxM     | 42.5135                       | 46.0193                         | 0.114317             | 0.368279  | 0.59965 | 0.737029 | no          |
| mraZ     | 44.8228                       | 48.5252                         | 0.1145               | 0.428207  | 0.545   | 0.691717 | no          |
| yqxD     | 37.3772                       | 40.4734                         | 0.114816             | 0.430552  | 0.54015 | 0.688432 | no          |
| tcyA     | 4.14235                       | 4.4898                          | 0.116199             | 0.27929   | 0.69115 | 0.80342  | no          |
| yoZ0     | 23.2142                       | 25.1682                         | 0.116595             | 0.329575  | 0.64215 | 0.766801 | no          |
| ctaA     | 5.17357                       | 5.61222                         | 0.117409             | 0.342074  | 0.63235 | 0.75996  | no          |
| yoyA     | 5.78044                       | 6.27195                         | 0.117736             | 0.178921  | 0.80015 | 0.880566 | no          |
| ylbL     | 3.30509                       | 3.58637                         | 0.117832             | 0.316735  | 0.6522  | 0.775578 | no          |
| rsbW     | 65.5095                       | 71.1494                         | 0.119147             | 0.264875  | 0.7041  | 0.814276 | no          |
| ywdD     | 6.04607                       | 6.56985                         | 0.119864             | 0.27018   | 0.6945  | 0.805862 | no          |
| recO     | 14.6597                       | 15.9298                         | 0.11987              | 0.428853  | 0.5404  | 0.688452 | no          |
| ytrB     | 4.74917                       | 5.1629                          | 0.120504             | 0.275086  | 0.69805 | 0.808724 | no          |
| thrB     | 89.9111                       | 97.8153                         | 0.121561             | 0.250139  | 0.72625 | 0.832101 | no          |
| ykpA     | 22.6253                       | 24.62                           | 0.121894             | 0.491183  | 0.4846  | 0.638627 | no          |
| ydaT     | 1.78642                       | 1.94413                         | 0.122057             | 0.161698  | 0.8172  | 0.891611 | no          |
| comS     | 281.804                       | 306.692                         | 0.122101             | 0.006702  | 0.94605 | 0.967343 | no          |
| bioYB    | 41.5099                       | 45.1908                         | 0.122574             | 0.482434  | 0.49    | 0.64402  | no          |
| ccdA     | 6.97403                       | 7.59257                         | 0.122596             | 0.352081  | 0.6226  | 0.753027 | no          |
| mdxG     | 0.459064                      | 0.499849                        | 0.122798             | 0         | 1       | 1        | no          |
| yjbE     | 1.10939                       | 1.20801                         | 0.122868             | 0.175447  | 0.8062  | 0.883838 | no          |
| alrA     | 5.84229                       | 6.36529                         | 0.123691             | 0.39998   | 0.57945 | 0.721222 | no          |
| opuD     | 6.60793                       | 7.20066                         | 0.12393              | 0.4496    | 0.5225  | 0.672069 | no          |
| ispA     | 8.23416                       | 8.97545                         | 0.124362             | 0.277187  | 0.6915  | 0.80342  | no          |
| ywbl     | 2.57086                       | 2.8024                          | 0.124412             | 0.293297  | 0.68    | 0.796458 | no          |

| Table S3 | value_als<br>S High<br>sorted | value_als<br>S Normal<br>sorted | log2(fold<br>change) | test_stat | p_value | q_value  | significant |
|----------|-------------------------------|---------------------------------|----------------------|-----------|---------|----------|-------------|
| yfhE     | 95.3456                       | 103.955                         | 0.124724             | 0.14839   | 0.83045 | 0.902211 | no          |
| ppaX     | 6.01848                       | 6.56463                         | 0.125316             | 0.190148  | 0.7828  | 0.870451 | no          |
| fer      | 218.456                       | 238.328                         | 0.125605             | 0.485568  | 0.49625 | 0.648809 | no          |
| ugtP     | 17.3369                       | 18.9245                         | 0.12641              | 0.49766   | 0.47455 | 0.631268 | no          |
| resE     | 7.21282                       | 7.87443                         | 0.126611             | 0.396109  | 0.57385 | 0.716401 | no          |
| clpY     | 16.0215                       | 17.4922                         | 0.126699             | 0.503047  | 0.4731  | 0.630013 | no          |
| yybG     | 1.62304                       | 1.77236                         | 0.126974             | 0.244683  | 0.72485 | 0.831007 | no          |
| ybbR     | 8.2303                        | 8.98989                         | 0.127359             | 0.396565  | 0.5747  | 0.716983 | no          |
| tsaC     | 2.4267                        | 2.6511                          | 0.127593             | 0.313112  | 0.65395 | 0.77667  | no          |
| dnaC     | 3.92744                       | 4.29611                         | 0.129441             | 0.394965  | 0.58025 | 0.721451 | no          |
| yvzE     | 4.15349                       | 4.54356                         | 0.129497             | 0.296199  | 0.67775 | 0.794882 | no          |
| kapB     | 12.8884                       | 14.1016                         | 0.12979              | 0.336682  | 0.63115 | 0.758762 | no          |
| ilvD     | 33.5578                       | 36.721                          | 0.129954             | 0.527146  | 0.4548  | 0.614099 | no          |
| pksE     | 4.65806                       | 5.09735                         | 0.130017             | 0.4061    | 0.5571  | 0.701589 | no          |
| ykyB     | 9.41798                       | 10.3114                         | 0.130754             | 0.341502  | 0.6279  | 0.756072 | no          |
| kdul     | 11.6417                       | 12.7475                         | 0.130918             | 0.454973  | 0.52165 | 0.671206 | no          |
| ybaN     | 2.61217                       | 2.86037                         | 0.130954             | 0.287346  | 0.6813  | 0.796735 | no          |
| yceB     | 0.608195                      | 0.666174                        | 0.131364             | 0.1804    | 0.79705 | 0.878559 | no          |
| bshBB    | 17.8652                       | 19.5691                         | 0.131419             | 0.470607  | 0.50715 | 0.65822  | no          |
| cysH     | 73.0664                       | 80.0453                         | 0.131608             | 0.531925  | 0.44975 | 0.610013 | no          |
| lonB     | 0.146291                      | 0.160287                        | 0.131813             | 0         | 1       | 1        | no          |
| gspA     | 11.0387                       | 12.0964                         | 0.132007             | 0.458149  | 0.5114  | 0.662354 | no          |
| ytxD     | 3.95598                       | 4.33565                         | 0.132214             | 0.28303   | 0.685   | 0.79881  | no          |
| hflX     | 3.71057                       | 4.06834                         | 0.132797             | 0.392021  | 0.5804  | 0.721451 | no          |
| ypbE     | 9.145                         | 10.0321                         | 0.133573             | 0.342123  | 0.6302  | 0.757864 | no          |
| rpoZ     | 185.277                       | 203.334                         | 0.134166             | 0.438878  | 0.5402  | 0.688432 | no          |
| yczI     | 95.4438                       | 104.807                         | 0.135016             | 0.433758  | 0.5429  | 0.69093  | no          |
| znuA     | 10.8592                       | 11.9318                         | 0.135893             | 0.48604   | 0.482   | 0.637066 | no          |
| ynaE     | 3.56036                       | 3.91315                         | 0.136306             | 0.306249  | 0.662   | 0.782993 | no          |
| yoyG     | 100.102                       | 110.033                         | 0.136464             | 0.173519  | 0.806   | 0.883838 | no          |
| yshB     | 11.3395                       | 12.4685                         | 0.136931             | 0.398057  | 0.57585 | 0.717938 | no          |
| ylaA     | 0.300154                      | 0.330179                        | 0.137543             | 0         | 1       | 1        | no          |
| yvzA     | 8.27057                       | 9.09934                         | 0.137775             | 0.287322  | 0.68395 | 0.798084 | no          |
| folB     | 25.2755                       | 27.8143                         | 0.138088             | 0.165082  | 0.8162  | 0.891611 | no          |
| yxzJ     | 46.0326                       | 50.66                           | 0.138191             | 0.159761  | 0.8062  | 0.883838 | no          |
| yraL     | 7.40298                       | 8.1481                          | 0.138358             | 0.199795  | 0.7689  | 0.861666 | no          |
| ybaC     | 2.07444                       | 2.28382                         | 0.138726             | 0.310502  | 0.6656  | 0.785757 | no          |
| yfmJ     | 3.96755                       | 4.37009                         | 0.139415             | 0.392559  | 0.58315 | 0.723656 | no          |
| fbp      | 4.67782                       | 5.15306                         | 0.139592             | 0.496308  | 0.48215 | 0.637066 | no          |
| arsR     | 3.90582                       | 4.30404                         | 0.140068             | 0.192116  | 0.7836  | 0.870822 | no          |
| kduD     | 7.09459                       | 7.82186                         | 0.140792             | 0.417422  | 0.5609  | 0.705311 | no          |
| secDF    | 30.3595                       | 33.4813                         | 0.141204             | 0.571817  | 0.4119  | 0.573894 | no          |
| yraO     | 2.20435                       | 2.43215                         | 0.141881             | 0.371372  | 0.6059  | 0.741294 | no          |
| yczN     | 16.4612                       | 18.1683                         | 0.142356             | 0.099282  | 0.8528  | 0.915505 | no          |

| Table S3 | value_als<br>S High<br>sorted | value_als<br>S Normal<br>sorted | log2(fold<br>change) | test_stat | p_value | q_value  | significant |
|----------|-------------------------------|---------------------------------|----------------------|-----------|---------|----------|-------------|
| pksG     | 5.08002                       | 5.61296                         | 0.143926             | 0.404873  | 0.56165 | 0.705479 | no          |
| nap      | 13.7099                       | 15.1622                         | 0.145254             | 0.53743   | 0.4453  | 0.606247 | no          |
| yvgM     | 1.7604                        | 1.94708                         | 0.145409             | 0.208231  | 0.7644  | 0.859315 | no          |
| ylxX     | 7.78236                       | 8.61097                         | 0.145967             | 0.431674  | 0.54235 | 0.690465 | no          |
| exuR     | 4.96501                       | 5.49371                         | 0.145985             | 0.433588  | 0.5437  | 0.691197 | no          |
| yugP     | 3.31837                       | 3.67194                         | 0.146067             | 0.328573  | 0.6464  | 0.770644 | no          |
| codY     | 23.4487                       | 25.9634                         | 0.146972             | 0.570242  | 0.42075 | 0.582961 | no          |
| bsn      | 2.21791                       | 2.45656                         | 0.147439             | 0.324012  | 0.64575 | 0.770115 | no          |
| bacG     | 7.5105                        | 8.32268                         | 0.148139             | 0.518851  | 0.45905 | 0.616647 | no          |
| ahpF     | 70.9135                       | 78.5902                         | 0.148288             | 0.592387  | 0.407   | 0.569617 | no          |
| ypmP     | 161.255                       | 178.8                           | 0.148998             | 0.554638  | 0.4265  | 0.587943 | no          |
| ypqP     | 2.75754                       | 3.05795                         | 0.149183             | 0.297387  | 0.67265 | 0.791387 | no          |
| gyrA     | 20.9607                       | 23.2462                         | 0.149309             | 0.606361  | 0.3831  | 0.546479 | no          |
| pbuO     | 2.98604                       | 3.31362                         | 0.150177             | 0.423462  | 0.54385 | 0.691197 | no          |
| yfkN     | 2.50247                       | 2.7794                          | 0.151417             | 0.569337  | 0.41215 | 0.574022 | no          |
| yneF     | 111.696                       | 124.092                         | 0.151835             | 0.462052  | 0.5144  | 0.665086 | no          |
| gsiB     | 17.2856                       | 19.2147                         | 0.152636             | 0.41942   | 0.54695 | 0.693484 | no          |
| lytS     | 1.97396                       | 2.19445                         | 0.152764             | 0.360541  | 0.60125 | 0.737842 | no          |
| trnY-Glu | 810.167                       | 900.859                         | 0.153081             | 0.228755  | 0.74585 | 0.847392 | no          |
| ydcA     | 4.98594                       | 5.54498                         | 0.153316             | 0.374187  | 0.59105 | 0.730305 | no          |
| spsL     | 1.5425                        | 1.71548                         | 0.153344             | 0.181441  | 0.7921  | 0.875374 | no          |
| cotF     | 0.681579                      | 0.758178                        | 0.153655             | 0.132941  | 0.86075 | 0.919562 | no          |
| ynal     | 1.69917                       | 1.89059                         | 0.154007             | 0.210182  | 0.76115 | 0.856839 | no          |
| ytnP     | 35.0452                       | 38.9939                         | 0.15403              | 0.613182  | 0.3808  | 0.544244 | no          |
| yqhG     | 0.586974                      | 0.653345                        | 0.154549             | 0.186785  | 0.7904  | 0.874807 | no          |
| ypiP     | 6.54173                       | 7.28303                         | 0.154868             | 0.451595  | 0.5172  | 0.667219 | no          |
| yxkI     | 3.13884                       | 3.4976                          | 0.156133             | 0.481     | 0.49045 | 0.644164 | no          |
| ywdE     | 3.85408                       | 4.29683                         | 0.156884             | 0.32701   | 0.64765 | 0.771888 | no          |
| dxs      | 16.8262                       | 18.7598                         | 0.156938             | 0.526309  | 0.4549  | 0.614099 | no          |
| yerO     | 1.69341                       | 1.88817                         | 0.157058             | 0.316248  | 0.6533  | 0.77651  | no          |
| thyA     | 3.23244                       | 3.6051                          | 0.157415             | 0.389517  | 0.5853  | 0.725842 | no          |
| pucF     | 0.646026                      | 0.720695                        | 0.157797             | 0.252917  | 0.7166  | 0.825047 | no          |
| kinA     | 2.58735                       | 2.88653                         | 0.157862             | 0.475414  | 0.50285 | 0.654068 | no          |
| slrR     | 3.92974                       | 4.38581                         | 0.15841              | 0.303721  | 0.667   | 0.786912 | no          |
| sigF     | 2.78281                       | 3.10731                         | 0.159122             | 0.359917  | 0.60985 | 0.74515  | no          |
| nusA     | 40.5429                       | 45.3152                         | 0.160545             | 0.648888  | 0.35    | 0.517169 | no          |
| artQ     | 25.6052                       | 28.6224                         | 0.160709             | 0.396776  | 0.5707  | 0.714619 | no          |
| penP     | 11.3758                       | 12.7245                         | 0.161632             | 0.578569  | 0.4046  | 0.567108 | no          |
| ltaSC    | 19.2407                       | 21.5285                         | 0.162081             | 0.653715  | 0.34795 | 0.515165 | no          |
| ptkA     | 8.35401                       | 9.36622                         | 0.164999             | 0.337304  | 0.6249  | 0.754162 | no          |
| yjdA     | 5.5213                        | 6.19056                         | 0.165061             | 0.459217  | 0.52055 | 0.670022 | no          |
| yisY     | 0.496219                      | 0.556388                        | 0.165115             | 0.184257  | 0.78965 | 0.874755 | no          |
| prsA     | 36.6053                       | 41.0539                         | 0.165467             | 0.662688  | 0.3511  | 0.517514 | no          |
| argI     | 3.91501                       | 4.39088                         | 0.165496             | 0.443111  | 0.5253  | 0.67474  | no          |

| Table S3 | value_als<br>S High<br>sorted | value_als<br>S Normal<br>sorted | log2(fold<br>change) | test_stat | p_value | q_value  | significant |
|----------|-------------------------------|---------------------------------|----------------------|-----------|---------|----------|-------------|
| azlD     | 4.57382                       | 5.13157                         | 0.166001             | 0.214603  | 0.7608  | 0.856703 | no          |
| pheA     | 5.7104                        | 6.40889                         | 0.166484             | 0.485062  | 0.4952  | 0.647663 | no          |
| rsbRA    | 10.9645                       | 12.3084                         | 0.166813             | 0.571789  | 0.4175  | 0.579965 | no          |
| yisK     | 8.33672                       | 9.36174                         | 0.167298             | 0.549329  | 0.4341  | 0.596149 | no          |
| dapF     | 8.58164                       | 9.63876                         | 0.167595             | 0.542803  | 0.44265 | 0.604098 | no          |
| yqfU     | 8.33037                       | 9.357                           | 0.167666             | 0.543246  | 0.44525 | 0.606247 | no          |
| cotU     | 2.15071                       | 2.41631                         | 0.167995             | 0.126125  | 0.87605 | 0.926585 | no          |
| murC     | 17.2539                       | 19.3921                         | 0.168546             | 0.66973   | 0.3372  | 0.506071 | no          |
| yjcS     | 7.70031                       | 8.65467                         | 0.168562             | 0.309218  | 0.6609  | 0.782435 | no          |
| yitH     | 4.82153                       | 5.41936                         | 0.168632             | 0.469951  | 0.5029  | 0.654068 | no          |
| bshC     | 6.51574                       | 7.32597                         | 0.169091             | 0.621887  | 0.37735 | 0.5411   | no          |
| yhdT     | 12.4184                       | 13.964                          | 0.169235             | 0.661338  | 0.3424  | 0.509574 | no          |
| rapJ     | 6.2418                        | 7.02156                         | 0.169829             | 0.554752  | 0.4332  | 0.595351 | no          |
| prfA     | 16.5606                       | 18.6316                         | 0.169997             | 0.663778  | 0.3414  | 0.509507 | no          |
| sfp      | 9.96433                       | 11.2195                         | 0.171159             | 0.125122  | 0.87595 | 0.926585 | no          |
| hemY     | 4.41114                       | 4.96749                         | 0.171366             | 0.547517  | 0.4382  | 0.599794 | no          |
| yoxD     | 17.0077                       | 19.1594                         | 0.171863             | 0.625397  | 0.3705  | 0.534976 | no          |
| degA     | 1.98773                       | 2.24012                         | 0.172455             | 0.391291  | 0.57975 | 0.721355 | no          |
| prpE     | 0.759204                      | 0.855862                        | 0.17289              | 0.220088  | 0.75445 | 0.85238  | no          |
| yxal     | 49.9936                       | 56.3679                         | 0.173131             | 0.668577  | 0.3424  | 0.509574 | no          |
| polC     | 4.88045                       | 5.50382                         | 0.17342              | 0.689904  | 0.32945 | 0.497993 | no          |
| sodA     | 211.941                       | 239.08                          | 0.17383              | 0.697579  | 0.324   | 0.492797 | no          |
| mrpG     | 44.3092                       | 49.9995                         | 0.174305             | 0.497556  | 0.4763  | 0.632536 | no          |
| crh      | 67.8335                       | 76.5642                         | 0.174671             | 0.534801  | 0.4524  | 0.612051 | no          |
| yesF     | 0.884679                      | 0.998646                        | 0.17482              | 0.249232  | 0.7253  | 0.831268 | no          |
| gpsA     | 14.7634                       | 16.6702                         | 0.175246             | 0.672507  | 0.3392  | 0.508052 | no          |
| yoyC     | 17.6958                       | 19.9871                         | 0.175666             | 0.318796  | 0.65155 | 0.775546 | no          |
| yybS     | 7.72714                       | 8.72849                         | 0.175798             | 0.570725  | 0.41605 | 0.57845  | no          |
| ctpA     | 9.89741                       | 11.1815                         | 0.175994             | 0.674286  | 0.3389  | 0.507806 | no          |
| yezG     | 10.4889                       | 11.8516                         | 0.17622              | 0.47301   | 0.5019  | 0.653678 | no          |
| yvcN     | 24.4756                       | 27.668                          | 0.176876             | 0.688256  | 0.3277  | 0.495799 | no          |
| dltB     | 32.7902                       | 37.0918                         | 0.177832             | 0.489841  | 0.48625 | 0.639992 | no          |
| odhB     | 105.459                       | 119.32                          | 0.178145             | 0.702918  | 0.31245 | 0.481307 | no          |
| yhfF     | 7.20612                       | 8.15353                         | 0.178202             | 0.396634  | 0.57115 | 0.714943 | no          |
| yxdK     | 1.68191                       | 1.90323                         | 0.178344             | 0.342551  | 0.61865 | 0.749768 | no          |
| yscB     | 9.43432                       | 10.676                          | 0.178377             | 0.542964  | 0.4409  | 0.602386 | no          |
| rpmGA    | 427.317                       | 483.623                         | 0.178575             | 0.551306  | 0.4361  | 0.598236 | no          |
| yodC     | 21.1706                       | 23.9719                         | 0.179285             | 0.649462  | 0.3564  | 0.521268 | no          |
| ylbN     | 97.6078                       | 110.526                         | 0.179312             | 0.721395  | 0.29965 | 0.469728 | no          |
| yncF     | 7.82891                       | 8.86743                         | 0.179704             | 0.427778  | 0.5434  | 0.691197 | no          |
| rsbQ     | 4.97349                       | 5.63383                         | 0.179857             | 0.499404  | 0.47635 | 0.632536 | no          |
| yocD     | 13.7805                       | 15.6138                         | 0.180198             | 0.680637  | 0.3316  | 0.499648 | no          |
| sipS     | 5.9426                        | 6.73493                         | 0.180568             | 0.447455  | 0.53395 | 0.6835   | no          |
| ftsY     | 9.44639                       | 10.7104                         | 0.181176             | 0.635482  | 0.36815 | 0.533025 | no          |

| Table S3 | value_als<br>S High<br>sorted | value_als<br>S Normal<br>sorted | log2(fold<br>change) | test_stat | p_value | q_value  | significant |
|----------|-------------------------------|---------------------------------|----------------------|-----------|---------|----------|-------------|
| yhdN     | 5.30937                       | 6.01988                         | 0.181193             | 0.543783  | 0.44405 | 0.60514  | no          |
| yfjM     | 2.1679                        | 2.45887                         | 0.181696             | 0.268061  | 0.699   | 0.809574 | no          |
| lepA     | 9.94328                       | 11.2801                         | 0.181981             | 0.716843  | 0.3039  | 0.47341  | no          |
| tcyB     | 2.19726                       | 2.49405                         | 0.182786             | 0.292753  | 0.67835 | 0.795145 | no          |
| dapG     | 17.2076                       | 19.5424                         | 0.183557             | 0.723869  | 0.3035  | 0.473337 | no          |
| yqfW     | 5.3483                        | 6.07554                         | 0.183933             | 0.453564  | 0.5193  | 0.669105 | no          |
| ykol     | 1.35355                       | 1.5376                          | 0.183938             | 0.252158  | 0.7289  | 0.833831 | no          |
| ypuF     | 1.64391                       | 1.86801                         | 0.18437              | 0.268034  | 0.71245 | 0.821618 | no          |
| uppS     | 26.0909                       | 29.6485                         | 0.184413             | 0.722601  | 0.3041  | 0.473482 | no          |
| ylxR     | 129.176                       | 146.84                          | 0.184904             | 0.69384   | 0.3178  | 0.486737 | no          |
| carA     | 31.6822                       | 36.035                          | 0.185723             | 0.328665  | 0.6383  | 0.764649 | no          |
| ytcl     | 4.39381                       | 4.99818                         | 0.185931             | 0.616586  | 0.39045 | 0.552041 | no          |
| deaD     | 6.65511                       | 7.57119                         | 0.186059             | 0.668216  | 0.3409  | 0.509372 | no          |
| yphF     | 15.8698                       | 18.0634                         | 0.186782             | 0.674341  | 0.3352  | 0.503272 | no          |
| tsaE     | 11.5864                       | 13.1901                         | 0.18702              | 0.390853  | 0.58295 | 0.723656 | no          |
| moeB     | 5.29187                       | 6.02786                         | 0.187869             | 0.568543  | 0.42515 | 0.587235 | no          |
| levR     | 1.09992                       | 1.25293                         | 0.187914             | 0.514001  | 0.46615 | 0.623202 | no          |
| yndB     | 18.2556                       | 20.8026                         | 0.188428             | 0.567586  | 0.4315  | 0.59367  | no          |
| xynC     | 4.16671                       | 4.74842                         | 0.188538             | 0.576533  | 0.4212  | 0.583368 | no          |
| ypmB     | 104.084                       | 118.648                         | 0.188933             | 0.760402  | 0.2758  | 0.441801 | no          |
| znuB     | 4.06856                       | 4.64067                         | 0.189813             | 0.363884  | 0.60355 | 0.739935 | no          |
| nifS     | 17.9217                       | 20.4483                         | 0.190274             | 0.672536  | 0.32955 | 0.497993 | no          |
| pckA     | 3.72988                       | 4.25738                         | 0.190834             | 0.605005  | 0.3935  | 0.554255 | no          |
| yeeA     | 1.6717                        | 1.90895                         | 0.191464             | 0.571623  | 0.4203  | 0.582554 | no          |
| ytjP     | 7.24531                       | 8.27503                         | 0.191716             | 0.694032  | 0.32455 | 0.492906 | no          |
| cysE     | 18.9463                       | 21.6421                         | 0.191931             | 0.53186   | 0.4476  | 0.608202 | no          |
| paiB     | 2.93889                       | 3.35728                         | 0.19202              | 0.400144  | 0.5731  | 0.715944 | no          |
| dltE     | 19.0447                       | 21.7669                         | 0.192748             | 0.726653  | 0.30445 | 0.473673 | no          |
| dltD     | 24.9618                       | 28.5437                         | 0.193452             | 0.726555  | 0.299   | 0.469103 | no          |
| infB     | 36.5834                       | 41.8555                         | 0.194229             | 0.701651  | 0.31515 | 0.484068 | no          |
| yqkC     | 27.9106                       | 31.9351                         | 0.194331             | 0.432142  | 0.53845 | 0.68714  | no          |
| yqjM     | 2.42879                       | 2.77975                         | 0.194718             | 0.477643  | 0.50005 | 0.652406 | no          |
| dacA     | 16.3496                       | 18.726                          | 0.19579              | 0.777023  | 0.262   | 0.426836 | no          |
| recR     | 16.8013                       | 19.2459                         | 0.195979             | 0.667219  | 0.34685 | 0.514352 | no          |
| gabR     | 0.358399                      | 0.410577                        | 0.196086             | 0         | 1       | 1        | no          |
| rsbV     | 88.8853                       | 101.831                         | 0.196164             | 0.346237  | 0.6232  | 0.753328 | no          |
| tepA     | 0.43836                       | 0.50243                         | 0.196805             | 0         | 1       | 1        | no          |
| ydiL     | 6.10629                       | 6.99912                         | 0.196876             | 0.546786  | 0.434   | 0.596149 | no          |
| kdgA     | 1.11873                       | 1.28241                         | 0.196985             | 0.266261  | 0.7075  | 0.817137 | no          |
| sufU     | 106.011                       | 121.551                         | 0.197339             | 0.29232   | 0.6837  | 0.798042 | no          |
| phrC     | 1675                          | 1920.63                         | 0.197419             | 0.345093  | 0.6213  | 0.752005 | no          |
| prsW     | 11.8111                       | 13.557                          | 0.198893             | 0.639016  | 0.37375 | 0.537797 | no          |
| yjaU     | 1.15922                       | 1.33278                         | 0.20129              | 0.315899  | 0.6534  | 0.77651  | no          |
| purU     | 10.6874                       | 12.289                          | 0.201453             | 0.707998  | 0.31495 | 0.484068 | no          |



| Table S3 | value_als<br>S High<br>sorted | value_als<br>S Normal<br>sorted | log2(fold<br>change) | test_stat | p_value | q_value  | significant |
|----------|-------------------------------|---------------------------------|----------------------|-----------|---------|----------|-------------|
| ypvA     | 4.62482                       | 5.31793                         | 0.201467             | 0.718827  | 0.29945 | 0.469612 | no          |
| rnjB     | 23.5893                       | 27.1318                         | 0.201853             | 0.815536  | 0.23985 | 0.404278 | no          |
| mrpE     | 9.97214                       | 11.4707                         | 0.201974             | 0.350043  | 0.6124  | 0.747349 | no          |
| cotSA    | 0.130695                      | 0.150357                        | 0.202195             | 0         | 1       | 1        | no          |
| ytpR     | 16.276                        | 18.7283                         | 0.202478             | 0.689331  | 0.3324  | 0.500275 | no          |
| yqeM     | 30.8752                       | 35.535                          | 0.202792             | 0.655857  | 0.3493  | 0.516549 | no          |
| yxQ      | 3.18218                       | 3.66429                         | 0.203516             | 0.456716  | 0.51555 | 0.666075 | no          |
| yrzB     | 107.906                       | 124.269                         | 0.203691             | 0.750122  | 0.28275 | 0.450501 | no          |
| nusG     | 19.0609                       | 21.9603                         | 0.204281             | 0.688886  | 0.32675 | 0.494963 | no          |
| yfiY     | 30.3809                       | 35.0127                         | 0.204712             | 0.819475  | 0.24605 | 0.410157 | no          |
| csH      | 29.4432                       | 33.9423                         | 0.205153             | 0.830027  | 0.2405  | 0.404517 | no          |
| arxR     | 6.24335                       | 7.19758                         | 0.205191             | 0.368595  | 0.6072  | 0.742642 | no          |
| yqfD     | 1.18484                       | 1.36694                         | 0.20625              | 0.228873  | 0.75165 | 0.851748 | no          |
| yoaO     | 2.01718                       | 2.32737                         | 0.206355             | 0.313627  | 0.6569  | 0.778984 | no          |
| yvbJ     | 12.5408                       | 14.4767                         | 0.207104             | 0.825236  | 0.2382  | 0.403275 | no          |
| pdp      | 3.57108                       | 4.12375                         | 0.207594             | 0.614024  | 0.38935 | 0.55153  | no          |
| yjFB     | 59.3237                       | 68.5049                         | 0.207597             | 0.389045  | 0.5857  | 0.72598  | no          |
| yabS     | 2.66263                       | 3.07617                         | 0.208282             | 0.431691  | 0.5292  | 0.678583 | no          |
| mtnE     | 7.54628                       | 8.72052                         | 0.208648             | 0.734344  | 0.29795 | 0.468439 | no          |
| fin      | 45.6595                       | 52.7721                         | 0.208862             | 0.526657  | 0.45025 | 0.61047  | no          |
| upp      | 20.7006                       | 23.9257                         | 0.208887             | 0.763533  | 0.27755 | 0.443842 | no          |
| ptb      | 3.95178                       | 4.56857                         | 0.209239             | 0.568564  | 0.42465 | 0.586841 | no          |
| rpsL     | 1123.23                       | 1298.84                         | 0.209565             | 0.746494  | 0.2828  | 0.450501 | no          |
| malS     | 25.5423                       | 29.5411                         | 0.209838             | 0.849339  | 0.22795 | 0.393684 | no          |
| yvrD     | 3.91586                       | 4.52955                         | 0.210038             | 0.541147  | 0.4425  | 0.604098 | no          |
| mgfK     | 11.6286                       | 13.4538                         | 0.21034              | 0.766297  | 0.27125 | 0.436008 | no          |
| yjcF     | 21.0003                       | 24.3143                         | 0.211394             | 0.652224  | 0.3537  | 0.519149 | no          |
| yaaL     | 18.2199                       | 21.1033                         | 0.211951             | 0.370585  | 0.59865 | 0.736469 | no          |
| atpC     | 119.622                       | 138.582                         | 0.212257             | 0.848573  | 0.22905 | 0.395045 | no          |
| lplJ     | 9.85165                       | 11.4202                         | 0.21315              | 0.75753   | 0.28415 | 0.451881 | no          |
| ispE     | 14.1855                       | 16.4442                         | 0.213159             | 0.78919   | 0.25915 | 0.423383 | no          |
| bioW     | 49.276                        | 57.1397                         | 0.213609             | 0.343935  | 0.6181  | 0.74971  | no          |
| mfd      | 6.47598                       | 7.51008                         | 0.21373              | 0.852291  | 0.2261  | 0.391482 | no          |
| yeaB     | 1.36812                       | 1.58693                         | 0.21405              | 0.395622  | 0.57605 | 0.717947 | no          |
| ykrA     | 6.17661                       | 7.16533                         | 0.214219             | 0.61493   | 0.3872  | 0.549109 | no          |
| ykvA     | 5.65112                       | 6.55624                         | 0.214332             | 0.352527  | 0.6123  | 0.747349 | no          |
| nasD     | 1.22285                       | 1.4189                          | 0.214515             | 0.579523  | 0.4098  | 0.571821 | no          |
| rpsB     | 108.39                        | 125.804                         | 0.214943             | 0.86976   | 0.2176  | 0.383263 | no          |
| ytmP     | 13.7926                       | 16.0106                         | 0.215137             | 0.702702  | 0.3232  | 0.491981 | no          |
| lcfB     | 0.623288                      | 0.723783                        | 0.215658             | 0.3888    | 0.5884  | 0.727753 | no          |
| nasF     | 4.09601                       | 4.75647                         | 0.215674             | 0.684522  | 0.33315 | 0.501    | no          |
| yusZ     | 3.01367                       | 3.50036                         | 0.215983             | 0.525062  | 0.4543  | 0.613867 | no          |
| ytpP     | 23.8845                       | 27.7492                         | 0.216374             | 0.594592  | 0.39085 | 0.552188 | no          |
| ydgD     | 52.6915                       | 61.2301                         | 0.21667              | 0.628645  | 0.36735 | 0.53228  | no          |

| Table S3 | value_als<br>S High<br>sorted | value_als<br>S Normal<br>sorted | log2(fold<br>change) | test_stat | p_value | q_value  | significant |
|----------|-------------------------------|---------------------------------|----------------------|-----------|---------|----------|-------------|
| nadC     | 44.4414                       | 51.6455                         | 0.216738             | 0.378482  | 0.59205 | 0.731056 | no          |
| cdnD     | 10.5369                       | 12.2513                         | 0.217481             | 0.776519  | 0.2611  | 0.425927 | no          |
| opuBB    | 6.02661                       | 7.00732                         | 0.217515             | 0.58949   | 0.39485 | 0.555737 | no          |
| ytnA     | 14.3444                       | 16.7024                         | 0.219575             | 0.8667    | 0.2198  | 0.385047 | no          |
| ymfM     | 8.65572                       | 10.0826                         | 0.220137             | 0.723145  | 0.3019  | 0.472421 | no          |
| ytjA     | 42.8072                       | 49.9284                         | 0.222008             | 0.412598  | 0.55475 | 0.699542 | no          |
| yhcT     | 0.603063                      | 0.703462                        | 0.222163             | 0.296718  | 0.67965 | 0.796302 | no          |
| oppF     | 11.8428                       | 13.8161                         | 0.222342             | 0.804742  | 0.25305 | 0.416377 | no          |
| rnz      | 2.80804                       | 3.27686                         | 0.222751             | 0.550226  | 0.43735 | 0.59929  | no          |
| yodN     | 0.417877                      | 0.48768                         | 0.222856             | 0         | 1       | 1        | no          |
| yrrK     | 25.4124                       | 29.6668                         | 0.223315             | 0.721232  | 0.30835 | 0.478346 | no          |
| yycR     | 0.746968                      | 0.87248                         | 0.224075             | 0.38544   | 0.58665 | 0.726502 | no          |
| trpP     | 17.2037                       | 20.0951                         | 0.224126             | 0.726252  | 0.3104  | 0.47949  | no          |
| metK     | 24.9411                       | 29.133                          | 0.224129             | 0.897498  | 0.19655 | 0.357055 | no          |
| rtbJ     | 10.6692                       | 12.4645                         | 0.224374             | 0.693604  | 0.32985 | 0.498244 | no          |
| ydgG     | 1.47369                       | 1.72232                         | 0.224922             | 0.172784  | 0.81135 | 0.888701 | no          |
| yvdT     | 5.21545                       | 6.10682                         | 0.22763              | 0.562423  | 0.424   | 0.586594 | no          |
| yxek     | 2.43822                       | 2.85511                         | 0.227718             | 0.614178  | 0.37735 | 0.5411   | no          |
| yugJ     | 9.91252                       | 11.6119                         | 0.228281             | 0.846822  | 0.2247  | 0.390246 | no          |
| yutD     | 29.6007                       | 34.6885                         | 0.228823             | 0.598659  | 0.39255 | 0.553618 | no          |
| ykgA     | 2.60783                       | 3.05848                         | 0.229967             | 0.53903   | 0.44385 | 0.60514  | no          |
| queA     | 10.6315                       | 12.4778                         | 0.231024             | 0.840493  | 0.2397  | 0.404278 | no          |
| yoZQ     | 3.07413                       | 3.60934                         | 0.231554             | 0.260291  | 0.7168  | 0.825047 | no          |
| mutSB    | 5.35643                       | 6.28926                         | 0.231618             | 0.886224  | 0.20205 | 0.363593 | no          |
| yqeK     | 12.3895                       | 14.5506                         | 0.231967             | 0.519978  | 0.4591  | 0.616647 | no          |
| deoD     | 12.7927                       | 15.0269                         | 0.232225             | 0.785607  | 0.26475 | 0.429151 | no          |
| yoaH     | 2.45929                       | 2.89096                         | 0.233309             | 0.681679  | 0.33355 | 0.501197 | no          |
| ylbG     | 17.6596                       | 20.766                          | 0.23377              | 0.497741  | 0.4793  | 0.63527  | no          |
| mtnX     | 28.0342                       | 32.9755                         | 0.234206             | 0.472463  | 0.50125 | 0.653515 | no          |
| scpA     | 7.02925                       | 8.26894                         | 0.234332             | 0.594092  | 0.3972  | 0.558203 | no          |
| pbpA     | 7.74873                       | 9.11612                         | 0.23446              | 0.918405  | 0.1896  | 0.348936 | no          |
| polX     | 4.31824                       | 5.08135                         | 0.234767             | 0.797447  | 0.2512  | 0.414751 | no          |
| cgeE     | 2.55941                       | 3.01422                         | 0.235975             | 0.525409  | 0.457   | 0.614778 | no          |
| gudB     | 33.9128                       | 39.9441                         | 0.236152             | 0.954873  | 0.1764  | 0.332834 | no          |
| ypwA     | 13.2402                       | 15.5959                         | 0.23624              | 0.934926  | 0.1873  | 0.346056 | no          |
| ltaSP    | 1.72993                       | 2.03813                         | 0.236536             | 0.649953  | 0.35585 | 0.520668 | no          |
| bdhA     | 35.3895                       | 41.6999                         | 0.236725             | 0.951155  | 0.17425 | 0.330615 | no          |
| rpmB     | 192.452                       | 226.797                         | 0.236904             | 0.732484  | 0.3035  | 0.473337 | no          |
| trxB     | 9.24138                       | 10.894                          | 0.237354             | 0.821404  | 0.24645 | 0.410607 | no          |
| capC     | 1.3868                        | 1.63515                         | 0.23766              | 0.284807  | 0.68895 | 0.801955 | no          |
| ylxP     | 193.979                       | 228.737                         | 0.237789             | 0.408281  | 0.5651  | 0.708557 | no          |
| rsfS     | 44.7887                       | 52.8249                         | 0.238082             | 0.463307  | 0.51435 | 0.665086 | no          |
| yugK     | 2.63436                       | 3.10843                         | 0.238732             | 0.637556  | 0.3659  | 0.531209 | no          |
| ywmD     | 0.947553                      | 1.11845                         | 0.239219             | 0.323078  | 0.64305 | 0.767564 | no          |

| Table S3   | value_als<br>S High<br>sorted | value_als<br>S Normal<br>sorted | log2(fold<br>change) | test_stat | p_value | q_value  | significant |
|------------|-------------------------------|---------------------------------|----------------------|-----------|---------|----------|-------------|
| ybgA       | 1.78865                       | 2.11271                         | 0.240217             | 0.448945  | 0.53185 | 0.681513 | no          |
| fbpC       | 68.6276                       | 81.0734                         | 0.240439             | 0.163172  | 0.8318  | 0.902627 | no          |
| yrhG       | 0.900694                      | 1.06431                         | 0.240805             | 0.356958  | 0.6152  | 0.749174 | no          |
| trnSL-Glu2 | 587.007                       | 693.67                          | 0.240873             | 0.338432  | 0.6282  | 0.756189 | no          |
| sufB       | 51.208                        | 60.5332                         | 0.241358             | 0.977464  | 0.16545 | 0.320361 | no          |
| mrnC       | 11.6032                       | 13.7227                         | 0.242041             | 0.475082  | 0.4979  | 0.650738 | no          |
| yrdC       | 6.85266                       | 8.10498                         | 0.242144             | 0.639326  | 0.36135 | 0.526108 | no          |
| comN       | 82.3741                       | 97.4733                         | 0.242816             | 0.873736  | 0.2138  | 0.378534 | no          |
| yclP       | 22.1068                       | 26.1606                         | 0.242906             | 0.514145  | 0.462   | 0.619941 | no          |
| prpC       | 13.0995                       | 15.5021                         | 0.242953             | 0.5653    | 0.41915 | 0.581384 | no          |
| mtnN       | 9.10777                       | 10.7785                         | 0.242989             | 0.747118  | 0.28565 | 0.45388  | no          |
| lysA       | 21.3733                       | 25.2945                         | 0.243017             | 0.973754  | 0.1665  | 0.321797 | no          |
| secA       | 21.067                        | 24.9388                         | 0.243402             | 0.987325  | 0.16335 | 0.318013 | no          |
| rnr        | 5.86335                       | 6.94163                         | 0.24355              | 0.941096  | 0.1831  | 0.340825 | no          |
| yppD       | 0.604542                      | 0.715809                        | 0.243731             | 0         | 1       | 1        | no          |
| ybdO       | 26.5486                       | 31.4372                         | 0.243837             | 0.978605  | 0.1596  | 0.313193 | no          |
| ptsH       | 745.899                       | 883.309                         | 0.243939             | 0.453916  | 0.51955 | 0.669196 | no          |
| rpsG       | 397.694                       | 471.181                         | 0.244621             | 0.964247  | 0.16985 | 0.325575 | no          |
| ytwF       | 12.916                        | 15.3079                         | 0.245118             | 0.544617  | 0.4388  | 0.600176 | no          |
| nadA       | 49.2287                       | 58.3479                         | 0.245181             | 0.527936  | 0.4554  | 0.61429  | no          |
| bslA       | 47.0771                       | 55.8152                         | 0.245632             | 0.967602  | 0.16795 | 0.323761 | no          |
| yqfF       | 6.97223                       | 8.27259                         | 0.24672              | 0.958477  | 0.1725  | 0.328463 | no          |
| ytpB       | 7.33101                       | 8.69999                         | 0.247002             | 0.719579  | 0.30025 | 0.470274 | no          |
| pepA       | 11.0038                       | 13.0638                         | 0.247571             | 0.965478  | 0.17195 | 0.328084 | no          |
| ctc        | 50.882                        | 60.4096                         | 0.247622             | 0.984331  | 0.16185 | 0.316014 | no          |
| plsY       | 12.6548                       | 15.0297                         | 0.248127             | 0.777033  | 0.278   | 0.444181 | no          |
| nhaK       | 3.26893                       | 3.88298                         | 0.248343             | 0.822734  | 0.25125 | 0.414751 | no          |
| grpE       | 67.216                        | 79.8556                         | 0.248587             | 0.995748  | 0.1531  | 0.303598 | no          |
| gapA       | 139.075                       | 165.254                         | 0.248818             | 0.975858  | 0.16415 | 0.31874  | no          |
| tgt        | 11.9265                       | 14.1719                         | 0.248867             | 0.950342  | 0.17275 | 0.328699 | no          |
| rok        | 20.7822                       | 24.696                          | 0.248927             | 0.885181  | 0.21045 | 0.374557 | no          |
| ydbA       | 1.57957                       | 1.87729                         | 0.249119             | 0.477906  | 0.5055  | 0.656306 | no          |
| yflP       | 3.30599                       | 3.9296                          | 0.249299             | 0.659788  | 0.34295 | 0.510189 | no          |
| dhbC       | 11.4288                       | 13.5849                         | 0.249335             | 0.947823  | 0.1786  | 0.335722 | no          |
| hisJ       | 6.10566                       | 7.2605                          | 0.249921             | 0.615065  | 0.38315 | 0.546479 | no          |
| ywiE       | 4.65093                       | 5.53196                         | 0.250273             | 0.836978  | 0.23435 | 0.400486 | no          |
| yqjU       | 27.8545                       | 33.1364                         | 0.250509             | 0.243852  | 0.72175 | 0.828725 | no          |
| yofF       | 14.195                        | 16.8887                         | 0.250678             | 0.560456  | 0.42245 | 0.584666 | no          |
| ppnKB      | 5.71691                       | 6.80366                         | 0.251076             | 0.724466  | 0.3088  | 0.478845 | no          |
| gcvT       | 18.044                        | 21.475                          | 0.251141             | 0.98949   | 0.15985 | 0.313256 | no          |
| spo0A      | 13.5081                       | 16.0791                         | 0.251362             | 0.904096  | 0.1937  | 0.354026 | no          |
| ykoH       | 0.845343                      | 1.00639                         | 0.251576             | 0.434781  | 0.5361  | 0.684843 | no          |
| dapA       | 26.9344                       | 32.0818                         | 0.252305             | 1.00061   | 0.1516  | 0.301745 | no          |
| lpdV       | 5.78352                       | 6.88911                         | 0.25237              | 0.877668  | 0.2113  | 0.375354 | no          |

| Table S3  | value_als<br>S High<br>sorted | value_als<br>S Normal<br>sorted | log2(fold<br>change) | test_stat | p_value | q_value  | significant |
|-----------|-------------------------------|---------------------------------|----------------------|-----------|---------|----------|-------------|
| nth       | 9.3965                        | 11.194                          | 0.252531             | 0.574797  | 0.40625 | 0.568994 | no          |
| tuaH      | 0.539393                      | 0.642582                        | 0.252545             | 0.372745  | 0.59425 | 0.733046 | no          |
| dck       | 8.21197                       | 9.78599                         | 0.25299              | 0.638688  | 0.36995 | 0.534667 | no          |
| ctaF      | 32.8055                       | 39.1006                         | 0.253251             | 0.771434  | 0.27745 | 0.443842 | no          |
| yfID      | 2.73001                       | 3.25432                         | 0.253451             | 0         | 1       | 1        | no          |
| yitK      | 9.65114                       | 11.5074                         | 0.253791             | 0.694248  | 0.3227  | 0.491801 | no          |
| yojK      | 1.56711                       | 1.86871                         | 0.25394              | 0.581865  | 0.41135 | 0.573555 | no          |
| yozZ      | 2.52588                       | 3.01209                         | 0.253978             | 0         | 1       | 1        | no          |
| cotM      | 0.410142                      | 0.489209                        | 0.254326             | 0         | 1       | 1        | no          |
| yfjE      | 3.81126                       | 4.54624                         | 0.254404             | 0.48603   | 0.48725 | 0.640856 | no          |
| yqgC      | 30.1135                       | 35.9217                         | 0.254446             | 0.923068  | 0.1897  | 0.348936 | no          |
| gerKA     | 0.109279                      | 0.130377                        | 0.254676             | 0         | 1       | 1        | no          |
| argS      | 8.78579                       | 10.4821                         | 0.254683             | 0.90989   | 0.1963  | 0.357031 | no          |
| mtrB      | 85.975                        | 102.584                         | 0.254813             | 0.758323  | 0.2859  | 0.454084 | no          |
| ctaG      | 6.73354                       | 8.03509                         | 0.25495              | 0.790127  | 0.2637  | 0.42867  | no          |
| yhfE      | 8.80976                       | 10.513                          | 0.254993             | 0.893712  | 0.20105 | 0.362407 | no          |
| ytpQ      | 20.3805                       | 24.3272                         | 0.255377             | 0.985305  | 0.1655  | 0.320361 | no          |
| trnB-Ser1 | 1677.3                        | 2002.31                         | 0.255521             | 0.713474  | 0.3095  | 0.47949  | no          |
| ydjC      | 1.86176                       | 2.2225                          | 0.255522             | 0.272273  | 0.7008  | 0.811155 | no          |
| ymaC      | 0.902921                      | 1.0781                          | 0.255821             | 0.352251  | 0.6198  | 0.750676 | no          |
| thrC      | 43.5601                       | 52.0187                         | 0.256024             | 0.400299  | 0.5724  | 0.715308 | no          |
| rsmE      | 12.1813                       | 14.5513                         | 0.256476             | 0.539209  | 0.4413  | 0.602712 | no          |
| galE      | 23.1884                       | 27.7024                         | 0.256608             | 1.01989   | 0.146   | 0.293414 | no          |
| clpQ      | 27.2769                       | 32.5995                         | 0.257169             | 0.952446  | 0.1728  | 0.328699 | no          |
| yvkN      | 13.5309                       | 16.1761                         | 0.257598             | 0.408946  | 0.5486  | 0.695104 | no          |
| htrC      | 3.42455                       | 4.09531                         | 0.258057             | 0.743485  | 0.29365 | 0.46324  | no          |
| rpoC      | 53.0326                       | 63.4212                         | 0.258085             | 0.944331  | 0.17925 | 0.336285 | no          |
| yprA      | 2.74619                       | 3.28459                         | 0.258281             | 0.84317   | 0.23315 | 0.39935  | no          |
| ykuP      | 31.8954                       | 38.1575                         | 0.258619             | 0.928657  | 0.1909  | 0.350453 | no          |
| yteV      | 1.0021                        | 1.19884                         | 0.258622             | 0         | 1       | 1        | no          |
| proG      | 3.44122                       | 4.11743                         | 0.258823             | 0.653757  | 0.35035 | 0.517169 | no          |
| yszA      | 0.849476                      | 1.01666                         | 0.259199             | 0         | 1       | 1        | no          |
| yrzP      | 0.80571                       | 0.9644                          | 0.25937              | 0         | 1       | 1        | no          |
| ydeO      | 12.9031                       | 15.4449                         | 0.259409             | 0.945422  | 0.1747  | 0.331132 | no          |
| ftsA      | 24.762                        | 29.6448                         | 0.259651             | 1.04417   | 0.1336  | 0.277146 | no          |
| tlpB      | 5.87845                       | 7.03763                         | 0.259654             | 0.981891  | 0.1599  | 0.313256 | no          |
| yqaP      | 24.3348                       | 29.1372                         | 0.259839             | 1.02905   | 0.1449  | 0.292147 | no          |
| clpX      | 37.1345                       | 44.4756                         | 0.260255             | 1.05613   | 0.1307  | 0.272645 | no          |
| yheE      | 1.09397                       | 1.31042                         | 0.260457             | 0         | 1       | 1        | no          |
| yvzC      | 0.442147                      | 0.529808                        | 0.260942             | 0         | 1       | 1        | no          |
| ydeP      | 3.22209                       | 3.86127                         | 0.261079             | 0.403029  | 0.5637  | 0.707577 | no          |
| ycsG      | 6.5962                        | 7.90508                         | 0.261144             | 0.895836  | 0.2035  | 0.365322 | no          |
| yodI      | 0.35156                       | 0.421391                        | 0.26139              | 0         | 1       | 1        | no          |
| hemL      | 11.0209                       | 13.2114                         | 0.261538             | 1.00521   | 0.1503  | 0.300278 | no          |

| Table S3 | value_als<br>S High<br>sorted | value_als<br>S Normal<br>sorted | log2(fold<br>change) | test_stat | p_value | q_value  | significant |
|----------|-------------------------------|---------------------------------|----------------------|-----------|---------|----------|-------------|
| yImD     | 30.0242                       | 35.9935                         | 0.261613             | 1.04023   | 0.13625 | 0.280719 | no          |
| ytzC     | 0.277744                      | 0.333003                        | 0.261779             | 0         | 1       | 1        | no          |
| yobR     | 7.81112                       | 9.36738                         | 0.262115             | 0.794966  | 0.2651  | 0.42945  | no          |
| yvoD     | 11.1451                       | 13.3661                         | 0.262166             | 0.808015  | 0.24375 | 0.408145 | no          |
| yhdP     | 13.8528                       | 16.615                          | 0.262301             | 1.03117   | 0.14305 | 0.290298 | no          |
| -        | 16.7064                       | 20.0449                         | 0.262835             | 0.260763  | 0.73815 | 0.841604 | no          |
| ycsE     | 7.01891                       | 8.42212                         | 0.262937             | 0.777907  | 0.2711  | 0.435955 | no          |
| gerT     | 0.080025                      | 0.096025                        | 0.26296              | 0         | 1       | 1        | no          |
| ycdB     | 1.80151                       | 2.1617                          | 0.262961             | 0.67043   | 0.33795 | 0.506993 | no          |
| miaA     | 3.80017                       | 4.56012                         | 0.263006             | 0.712627  | 0.31125 | 0.48045  | no          |
| mapB     | 7.94788                       | 9.53787                         | 0.263096             | 0.805546  | 0.2559  | 0.419276 | no          |
| ycgl     | 0.055088                      | 0.06611                         | 0.263118             | 0         | 1       | 1        | no          |
| yvbT     | 1.59178                       | 1.91052                         | 0.263321             | 0.561974  | 0.42525 | 0.587235 | no          |
| yuzD     | 12.1727                       | 14.6115                         | 0.263453             | 0.597119  | 0.40025 | 0.561714 | no          |
| accA     | 34.3222                       | 41.1989                         | 0.263466             | 0.808319  | 0.24425 | 0.408683 | no          |
| yczH     | 5.02533                       | 6.03367                         | 0.263817             | 0.660278  | 0.35045 | 0.517169 | no          |
| sigX     | 9.56016                       | 11.4798                         | 0.263996             | 0.565553  | 0.4278  | 0.589231 | no          |
| yloA     | 3.75635                       | 4.51238                         | 0.264556             | 0.87064   | 0.22055 | 0.385911 | no          |
| yunF     | 4.17597                       | 5.02233                         | 0.266245             | 0.721016  | 0.30905 | 0.479034 | no          |
| ymaB     | 5.10981                       | 6.14614                         | 0.266411             | 0.673971  | 0.33825 | 0.507239 | no          |
| purR     | 23.1732                       | 27.8767                         | 0.266601             | 0.698446  | 0.3225  | 0.491801 | no          |
| kdgK     | 3.12363                       | 3.75899                         | 0.267122             | 0.696712  | 0.32125 | 0.490813 | no          |
| priA     | 3.69214                       | 4.44457                         | 0.267589             | 0.850879  | 0.22245 | 0.387963 | no          |
| ykwC     | 45.2414                       | 54.4618                         | 0.267601             | 1.07762   | 0.1265  | 0.267318 | no          |
| nfsB     | 2.44766                       | 2.94654                         | 0.267616             | 0.534123  | 0.4564  | 0.614568 | no          |
| ripX     | 6.64289                       | 7.99837                         | 0.267896             | 0.830754  | 0.2443  | 0.408683 | no          |
| ybaS     | 6.24461                       | 7.52307                         | 0.26871              | 0.832142  | 0.24545 | 0.409339 | no          |
| bacE     | 14.374                        | 17.3173                         | 0.268749             | 0.709066  | 0.31175 | 0.481023 | no          |
| lipA     | 15.6187                       | 18.8217                         | 0.269121             | 1.02269   | 0.14585 | 0.293414 | no          |
| yxiO     | 1.5797                        | 1.90436                         | 0.269651             | 0.633899  | 0.36655 | 0.531533 | no          |
| gyrB     | 15.8674                       | 19.1308                         | 0.269834             | 1.08403   | 0.122   | 0.26076  | no          |
| ykuO     | 10.883                        | 13.1258                         | 0.270324             | 0.782124  | 0.2693  | 0.434182 | no          |
| recD     | 3.65413                       | 4.40764                         | 0.270478             | 0.970958  | 0.16955 | 0.325501 | no          |
| yneT     | 19.1036                       | 23.0533                         | 0.271124             | 0.808736  | 0.2546  | 0.417329 | no          |
| ccpN     | 11.9294                       | 14.3986                         | 0.271405             | 0.871481  | 0.21795 | 0.383518 | no          |
| yfhS     | 27.5317                       | 33.2339                         | 0.271561             | 0.561678  | 0.4246  | 0.586841 | no          |
| ahrC     | 7.46039                       | 9.00663                         | 0.271737             | 0.656599  | 0.3543  | 0.519507 | no          |
| yweA     | 109.54                        | 132.299                         | 0.27235              | 1.09591   | 0.11655 | 0.251559 | no          |
| pgl      | 14.5493                       | 17.5881                         | 0.273649             | 1.0544    | 0.1357  | 0.279947 | no          |
| rplS     | 1044.68                       | 1262.97                         | 0.273758             | 1.03095   | 0.1422  | 0.289202 | no          |
| msrB     | 7.76082                       | 9.38347                         | 0.273912             | 0.656856  | 0.35425 | 0.519507 | no          |
| ycxD     | 0.541375                      | 0.654764                        | 0.274346             | 0.413965  | 0.55095 | 0.697136 | no          |
| natR     | 1.28798                       | 1.55823                         | 0.274803             | 0.441488  | 0.5256  | 0.674894 | no          |
| yfmK     | 6.89412                       | 8.34293                         | 0.275187             | 0.643002  | 0.36005 | 0.525167 | no          |

| Table S3 | value_als<br>S High<br>sorted | value_als<br>S Normal<br>sorted | log2(fold<br>change) | test_stat | p_value | q_value  | significant |
|----------|-------------------------------|---------------------------------|----------------------|-----------|---------|----------|-------------|
| yfhD     | 10.8619                       | 13.1621                         | 0.277105             | 0.297464  | 0.6745  | 0.792755 | no          |
| yjIA     | 2.78593                       | 3.37686                         | 0.277528             | 0.702119  | 0.31685 | 0.48588  | no          |
| metP     | 41.399                        | 50.1883                         | 0.277756             | 0.74261   | 0.29255 | 0.46209  | no          |
| ysfE     | 8.4821                        | 10.2844                         | 0.277962             | 0.391934  | 0.57375 | 0.716401 | no          |
| mgsR     | 40.5324                       | 49.1497                         | 0.278108             | 0.975339  | 0.16525 | 0.320209 | no          |
| menD     | 3.92931                       | 4.76486                         | 0.278159             | 0.6038    | 0.3915  | 0.55248  | no          |
| ydiK     | 10.0125                       | 12.1454                         | 0.278614             | 0.207889  | 0.77885 | 0.867609 | no          |
| yvsG     | 1.76591                       | 2.14241                         | 0.278829             | 0.398946  | 0.55505 | 0.699542 | no          |
| yqgT     | 3.32478                       | 4.03722                         | 0.280104             | 0.7877    | 0.2631  | 0.428254 | no          |
| glcK     | 5.22181                       | 6.34077                         | 0.280108             | 0.839965  | 0.24015 | 0.404278 | no          |
| guaB     | 30.3299                       | 36.8428                         | 0.280642             | 1.13721   | 0.1054  | 0.234543 | no          |
| gltX     | 38.0925                       | 46.2783                         | 0.280832             | 1.1373    | 0.1007  | 0.227474 | no          |
| ampS     | 11.654                        | 14.1644                         | 0.281444             | 1.08413   | 0.12525 | 0.265578 | no          |
| fliE     | 28.9035                       | 35.1456                         | 0.2821               | 0.816235  | 0.25125 | 0.414751 | no          |
| yrdF     | 2.58419                       | 3.1427                          | 0.282293             | 0.266338  | 0.7127  | 0.821618 | no          |
| pelC     | 2.58835                       | 3.14792                         | 0.282367             | 0.586661  | 0.4042  | 0.56676  | no          |
| argD     | 22.1611                       | 26.955                          | 0.282527             | 0.846872  | 0.23215 | 0.398002 | no          |
| yral     | 11.4021                       | 13.8707                         | 0.282735             | 0.675832  | 0.34175 | 0.509574 | no          |
| trxA     | 65.2116                       | 79.428                          | 0.284519             | 1.00582   | 0.1516  | 0.301745 | no          |
| ccpA     | 19.4824                       | 23.7392                         | 0.285098             | 1.12225   | 0.11035 | 0.241387 | no          |
| ydzN     | 7.19516                       | 8.76825                         | 0.285262             | 0.236494  | 0.72765 | 0.832855 | no          |
| ywjH     | 92.0698                       | 112.207                         | 0.285367             | 1.15682   | 0.10375 | 0.231812 | no          |
| yqfL     | 8.75164                       | 10.6679                         | 0.285655             | 0.926258  | 0.18785 | 0.346557 | no          |
| flhP     | 14.0689                       | 17.1499                         | 0.285695             | 1.04101   | 0.14065 | 0.287246 | no          |
| htpG     | 16.4848                       | 20.1057                         | 0.286466             | 1.15214   | 0.10035 | 0.22682  | no          |
| pksH     | 4.81018                       | 5.86922                         | 0.287078             | 0.588079  | 0.40745 | 0.56982  | no          |
| yqxl     | 85.6172                       | 104.49                          | 0.287395             | 1.15105   | 0.10275 | 0.230709 | no          |
| norM     | 3.09433                       | 3.78172                         | 0.289416             | 0.843237  | 0.23995 | 0.404278 | no          |
| yxkF     | 1.47119                       | 1.79881                         | 0.290062             | 0.566218  | 0.4132  | 0.575061 | no          |
| smc      | 5.23523                       | 6.40651                         | 0.291284             | 1.15415   | 0.1043  | 0.232511 | no          |
| ftsZ     | 31.201                        | 38.1842                         | 0.291384             | 1.17229   | 0.0961  | 0.220552 | no          |
| prfB     | 27.4653                       | 33.6299                         | 0.292136             | 1.17086   | 0.09775 | 0.222696 | no          |
| argF     | 44.7054                       | 54.7548                         | 0.292537             | 0.592352  | 0.39785 | 0.558906 | no          |
| rtbE     | 7.10596                       | 8.7078                          | 0.293279             | 0.473421  | 0.4999  | 0.652406 | no          |
| cysS     | 7.02761                       | 8.61381                         | 0.293618             | 0.818573  | 0.2444  | 0.408683 | no          |
| ypoC     | 8.09612                       | 9.92608                         | 0.293995             | 0.449203  | 0.5022  | 0.653678 | no          |
| ypjD     | 6.37701                       | 7.81869                         | 0.294047             | 0.54002   | 0.446   | 0.60669  | no          |
| yprB     | 3.8608                        | 4.73438                         | 0.294277             | 0.880428  | 0.21495 | 0.38021  | no          |
| ypjC     | 0.849399                      | 1.0422                          | 0.29512              | 0.454489  | 0.51075 | 0.661872 | no          |
| galT     | 2.69766                       | 3.31035                         | 0.295277             | 0.86479   | 0.22575 | 0.391342 | no          |
| ppaC     | 33.4843                       | 41.1022                         | 0.295728             | 1.18512   | 0.089   | 0.208865 | no          |
| ycxA     | 20.1299                       | 24.7178                         | 0.296214             | 1.18235   | 0.0906  | 0.211968 | no          |
| dnaG     | 17.0699                       | 20.9656                         | 0.296571             | 1.12072   | 0.1093  | 0.239933 | no          |
| glpW     | 6.34307                       | 7.79147                         | 0.296714             | 0.821107  | 0.2437  | 0.408145 | no          |

| Table S3 | value_als<br>S High<br>sorted | value_als<br>S Normal<br>sorted | log2(fold<br>change) | test_stat | p_value | q_value  | significant |
|----------|-------------------------------|---------------------------------|----------------------|-----------|---------|----------|-------------|
| mtnB     | 48.1416                       | 59.1557                         | 0.297234             | 0.733385  | 0.2936  | 0.46324  | no          |
| gcvPA    | 13.2821                       | 16.3222                         | 0.297351             | 0.85557   | 0.21975 | 0.385047 | no          |
| nagBA    | 4.57409                       | 5.624                           | 0.298113             | 0.620106  | 0.3762  | 0.540281 | no          |
| ftsW     | 11.0479                       | 13.5843                         | 0.298165             | 1.13755   | 0.10495 | 0.233681 | no          |
| yjoA     | 12.1159                       | 14.9004                         | 0.298449             | 0.848471  | 0.2341  | 0.400426 | no          |
| hepS     | 24.8576                       | 30.5732                         | 0.29858              | 1.16489   | 0.09775 | 0.222696 | no          |
| ydaF     | 10.184                        | 12.5259                         | 0.298617             | 0.868156  | 0.2235  | 0.389321 | no          |
| gtaB     | 29.0092                       | 35.6855                         | 0.298828             | 1.18894   | 0.091   | 0.212488 | no          |
| ywtE     | 6.6681                        | 8.20396                         | 0.299044             | 0.918876  | 0.1965  | 0.357055 | no          |
| yfkE     | 1.42126                       | 1.74868                         | 0.299096             | 0.624517  | 0.37665 | 0.540719 | no          |
| ybaK     | 0.521654                      | 0.641835                        | 0.299111             | 0.215895  | 0.7667  | 0.860492 | no          |
| maeN     | 17.2105                       | 21.1767                         | 0.29919              | 1.19007   | 0.09195 | 0.214303 | no          |
| yodM     | 2.09094                       | 2.57418                         | 0.299967             | 0.544745  | 0.44535 | 0.606248 | no          |
| rlmN     | 9.38504                       | 11.5618                         | 0.300931             | 1.08961   | 0.12165 | 0.260161 | no          |
| ylbJ     | 0.772424                      | 0.951621                        | 0.300994             | 0.536279  | 0.4474  | 0.608151 | no          |
| yqjT     | 12.5596                       | 15.483                          | 0.301894             | 0.761483  | 0.27685 | 0.443102 | no          |
| cinA     | 10.2555                       | 12.6431                         | 0.301947             | 1.14786   | 0.10245 | 0.230451 | no          |
| cimH     | 2.29033                       | 2.82393                         | 0.302147             | 0.818193  | 0.2472  | 0.411288 | no          |
| nadB     | 46.7842                       | 57.6954                         | 0.302433             | 0.791951  | 0.2583  | 0.422467 | no          |
| yknZ     | 45.2085                       | 55.7819                         | 0.303205             | 1.03954   | 0.13555 | 0.279947 | no          |
| flhO     | 12.3264                       | 15.215                          | 0.303746             | 1.07784   | 0.1229  | 0.262383 | no          |
| yyaT     | 1.56365                       | 1.9301                          | 0.303761             | 0.317342  | 0.65545 | 0.777956 | no          |
| leuS     | 15.0755                       | 18.6088                         | 0.303784             | 1.2261    | 0.08325 | 0.199522 | no          |
| odhA     | 66.3347                       | 81.8947                         | 0.304006             | 1.11593   | 0.1124  | 0.244867 | no          |
| qoxA     | 79.4433                       | 98.0939                         | 0.304238             | 1.23054   | 0.08055 | 0.194298 | no          |
| ywcJ     | 0.680563                      | 0.840375                        | 0.304304             | 0.389842  | 0.57725 | 0.719203 | no          |
| ynzF     | 2.39062                       | 2.95245                         | 0.304529             | 0.372787  | 0.6034  | 0.739935 | no          |
| phrK     | 512.474                       | 632.942                         | 0.304593             | 0.490695  | 0.4932  | 0.646179 | no          |
| dnaD     | 11.9157                       | 14.7195                         | 0.304868             | 1.01664   | 0.15195 | 0.301959 | no          |
| nagP     | 8.72659                       | 10.7847                         | 0.305501             | 1.14692   | 0.10255 | 0.230537 | no          |
| bst      | 11.1341                       | 13.7639                         | 0.305905             | 0.766116  | 0.2816  | 0.448973 | no          |
| argB     | 29.2614                       | 36.178                          | 0.306112             | 0.815742  | 0.24015 | 0.404278 | no          |
| trnI-Asn | 2229.37                       | 2756.56                         | 0.306236             | 0.687742  | 0.32935 | 0.497993 | no          |
| ktrD     | 2.68663                       | 3.322                           | 0.306255             | 0.862259  | 0.2187  | 0.383933 | no          |
| yqjE     | 19.5671                       | 24.1956                         | 0.306315             | 1.21343   | 0.08045 | 0.194298 | no          |
| ytl      | 3.84582                       | 4.75737                         | 0.306873             | 0.894158  | 0.2076  | 0.370544 | no          |
| trnD-Asn | 2129.9                        | 2636.32                         | 0.307736             | 0.716653  | 0.30985 | 0.47949  | no          |
| cyeA     | 0.488417                      | 0.604766                        | 0.308263             | 0.363466  | 0.60455 | 0.740613 | no          |
| ytmA     | 1.16382                       | 1.44125                         | 0.308455             | 0.512037  | 0.46705 | 0.624182 | no          |
| skfB     | 87.2282                       | 108.024                         | 0.30848              | 0.921318  | 0.18785 | 0.346557 | no          |
| yitY     | 4.26158                       | 5.2782                          | 0.308657             | 0.995672  | 0.1625  | 0.316815 | no          |
| gpsB     | 37.3393                       | 46.2582                         | 0.309013             | 0.912619  | 0.19865 | 0.359728 | no          |
| pncA     | 31.5962                       | 39.1673                         | 0.309899             | 1.1708    | 0.0963  | 0.220875 | no          |
| proS     | 21.7524                       | 26.9648                         | 0.309901             | 1.25171   | 0.07375 | 0.183222 | no          |

| Table S3 | value_als<br>S High<br>sorted | value_als<br>S Normal<br>sorted | log2(fold<br>change) | test_stat | p_value | q_value  | significant |
|----------|-------------------------------|---------------------------------|----------------------|-----------|---------|----------|-------------|
| fadN     | 0.545724                      | 0.676696                        | 0.310338             | 0.646014  | 0.37045 | 0.534976 | no          |
| yjcM     | 27.2185                       | 33.7514                         | 0.310364             | 1.24566   | 0.075   | 0.185341 | no          |
| etfB     | 4.89108                       | 6.06774                         | 0.311005             | 0.854772  | 0.22995 | 0.395663 | no          |
| ywqL     | 7.35903                       | 9.13273                         | 0.311531             | 0.924852  | 0.1939  | 0.354218 | no          |
| ylal     | 22.5748                       | 28.0187                         | 0.311676             | 0.546257  | 0.44055 | 0.602128 | no          |
| thrS     | 12.5943                       | 15.6372                         | 0.312206             | 1.24849   | 0.07425 | 0.184097 | no          |
| ftsX     | 10.8799                       | 13.5138                         | 0.31277              | 0.742472  | 0.29455 | 0.464072 | no          |
| yclQ     | 35.1923                       | 43.7123                         | 0.31278              | 1.25644   | 0.07495 | 0.18534  | no          |
| araM     | 0.19914                       | 0.247359                        | 0.312824             | 0         | 1       | 1        | no          |
| aroQ     | 32.9612                       | 40.9467                         | 0.31298              | 0.583261  | 0.40525 | 0.567806 | no          |
| ytbQ     | 23.2703                       | 28.9083                         | 0.31299              | 1.21589   | 0.0884  | 0.207993 | no          |
| pbpB     | 5.25139                       | 6.52522                         | 0.313329             | 1.10083   | 0.1116  | 0.24355  | no          |
| parC     | 7.56444                       | 9.39963                         | 0.31337              | 1.23953   | 0.07985 | 0.193485 | no          |
| pycA     | 21.2437                       | 26.4085                         | 0.313967             | 1.2679    | 0.07215 | 0.180568 | no          |
| asd      | 51.9098                       | 64.5682                         | 0.314817             | 1.27683   | 0.06835 | 0.173855 | no          |
| yxEM     | 4.78384                       | 5.95232                         | 0.315283             | 0.869502  | 0.21985 | 0.385047 | no          |
| uppP     | 7.1246                        | 8.86842                         | 0.315869             | 0.975223  | 0.17535 | 0.332027 | no          |
| yxB      | 12.2258                       | 15.2216                         | 0.31619              | 1.00253   | 0.1597  | 0.313193 | no          |
| ribC     | 11.2279                       | 13.9794                         | 0.316212             | 1.14993   | 0.10275 | 0.230709 | no          |
| feuC     | 2.7641                        | 3.44232                         | 0.316573             | 0.705174  | 0.31315 | 0.482186 | no          |
| rapC     | 33.3738                       | 41.5628                         | 0.316579             | 1.13337   | 0.10485 | 0.233598 | no          |
| serA     | 77.054                        | 95.9887                         | 0.316995             | 1.24662   | 0.0756  | 0.186085 | no          |
| yvaG     | 1.78293                       | 2.22202                         | 0.317618             | 0.63249   | 0.3732  | 0.537356 | no          |
| rpmF     | 1041.57                       | 1298.18                         | 0.31773              | 1.25865   | 0.0716  | 0.179553 | no          |
| yetH     | 8.82016                       | 10.9945                         | 0.317907             | 0.703206  | 0.3162  | 0.485159 | no          |
| fhuC     | 7.106                         | 8.85844                         | 0.318015             | 0.973812  | 0.16915 | 0.325235 | no          |
| ydjN     | 3.48549                       | 4.34596                         | 0.318313             | 0.885424  | 0.20825 | 0.371172 | no          |
| yyaK     | 14.3984                       | 17.9692                         | 0.319613             | 0.995527  | 0.15855 | 0.31258  | no          |
| lmrA     | 4.49509                       | 5.60989                         | 0.319622             | 0.745283  | 0.30005 | 0.470158 | no          |
| yxBG     | 1.22105                       | 1.5247                          | 0.320409             | 0.556873  | 0.43815 | 0.599794 | no          |
| araP     | 0.258685                      | 0.323066                        | 0.32063              | 0         | 1       | 1        | no          |
| yusV     | 31.999                        | 39.9725                         | 0.320982             | 1.27575   | 0.06985 | 0.176349 | no          |
| ftsE     | 24.2418                       | 30.2951                         | 0.321587             | 0.98016   | 0.1639  | 0.31842  | no          |
| skfA     | 3585.53                       | 4482.16                         | 0.322006             | 1.28988   | 0.0698  | 0.176342 | no          |
| yurR     | 3.9566                        | 4.94709                         | 0.322319             | 0.944429  | 0.186   | 0.344506 | no          |
| yetM     | 0.479111                      | 0.599152                        | 0.322563             | 0.443693  | 0.52365 | 0.672917 | no          |
| kinC     | 5.95397                       | 7.44633                         | 0.322678             | 1.09789   | 0.1244  | 0.26498  | no          |
| yfIL     | 4.95217                       | 6.20006                         | 0.324221             | 0.255925  | 0.71955 | 0.826708 | no          |
| yfIB     | 2.82536                       | 3.5397                          | 0.325193             | 0.488395  | 0.4847  | 0.638627 | no          |
| yybE     | 1.76728                       | 2.21413                         | 0.325205             | 0.680351  | 0.3403  | 0.508829 | no          |
| walR     | 4.22225                       | 5.28987                         | 0.32522              | 0.831585  | 0.23585 | 0.40158  | no          |
| epsB     | 7.14088                       | 8.94857                         | 0.325555             | 0.943722  | 0.1761  | 0.332604 | no          |
| ysoA     | 16.7356                       | 20.993                          | 0.326989             | 1.27418   | 0.07375 | 0.183222 | no          |
| spolIAA  | 4.30844                       | 5.40461                         | 0.327023             | 0.469052  | 0.50195 | 0.653678 | no          |



| Table S3 | value_als<br>S High<br>sorted | value_als<br>S Normal<br>sorted | log2(fold<br>change) | test_stat | p_value | q_value  | significant |
|----------|-------------------------------|---------------------------------|----------------------|-----------|---------|----------|-------------|
| menC     | 1.81341                       | 2.27571                         | 0.327612             | 0.475394  | 0.4924  | 0.64581  | no          |
| albA     | 9.14474                       | 11.4774                         | 0.327779             | 1.24183   | 0.0772  | 0.188655 | no          |
| metQ     | 57.9161                       | 72.69                           | 0.327793             | 1.3257    | 0.06005 | 0.157463 | no          |
| yqaE     | 3.57804                       | 4.49115                         | 0.327916             | 0.482582  | 0.4951  | 0.647663 | no          |
| kipl     | 4.1925                        | 5.26405                         | 0.328363             | 0.844531  | 0.22945 | 0.39537  | no          |
| qcrA     | 35.6999                       | 44.8271                         | 0.328448             | 1.25009   | 0.0745  | 0.184594 | no          |
| ynaG     | 13.5083                       | 16.9701                         | 0.329151             | 0.663401  | 0.35175 | 0.517916 | no          |
| yykC     | 1.29313                       | 1.62456                         | 0.329178             | 0.915419  | 0.1881  | 0.346847 | no          |
| fusA     | 372.161                       | 467.618                         | 0.329403             | 1.29898   | 0.0657  | 0.168956 | no          |
| ykuV     | 8.54693                       | 10.7444                         | 0.330109             | 0.833167  | 0.2392  | 0.404278 | no          |
| mrpD     | 7.77908                       | 9.7795                          | 0.330162             | 0.738829  | 0.29095 | 0.460733 | no          |
| sigZ     | 0.714367                      | 0.898105                        | 0.330218             | 0.326467  | 0.6291  | 0.757028 | no          |
| ytaF     | 10.6417                       | 13.3809                         | 0.330449             | 1.03225   | 0.14845 | 0.297537 | no          |
| mrpA     | 8.06395                       | 10.1474                         | 0.331553             | 0.98805   | 0.159   | 0.312971 | no          |
| fbpB     | 36.255                        | 45.6259                         | 0.331671             | 0.462664  | 0.5006  | 0.652896 | no          |
| yxep     | 3.962                         | 4.98724                         | 0.332011             | 0.778507  | 0.27225 | 0.437239 | no          |
| pepT     | 13.249                        | 16.6788                         | 0.332131             | 1.2956    | 0.06635 | 0.170276 | no          |
| ftsH     | 37.8781                       | 47.6865                         | 0.332217             | 1.34284   | 0.05435 | 0.146212 | no          |
| iolB     | 0.758214                      | 0.955534                        | 0.333702             | 0.474233  | 0.5     | 0.652406 | no          |
| rpIT     | 113.992                       | 143.707                         | 0.334199             | 1.32627   | 0.0597  | 0.156986 | no          |
| yvaK     | 8.58922                       | 10.829                          | 0.334296             | 1.04656   | 0.1407  | 0.287246 | no          |
| spoIVCA  | 0.605192                      | 0.763473                        | 0.335183             | 0.543011  | 0.44945 | 0.609828 | no          |
| pgk      | 74.1403                       | 93.5518                         | 0.335507             | 1.35102   | 0.05675 | 0.151037 | no          |
| mrpB     | 10.4297                       | 13.1666                         | 0.336193             | 0.358145  | 0.61035 | 0.745517 | no          |
| yjaZ     | 0.253311                      | 0.319976                        | 0.337057             | 0         | 1       | 1        | no          |
| lysS     | 18.7674                       | 23.7189                         | 0.337803             | 1.35409   | 0.053   | 0.144138 | no          |
| estB     | 6.99684                       | 8.84425                         | 0.338036             | 0.946457  | 0.1808  | 0.337554 | no          |
| guaC     | 4.07131                       | 5.14634                         | 0.338054             | 0.961746  | 0.1771  | 0.333817 | no          |
| yfkL     | 2.06296                       | 2.61019                         | 0.339437             | 0.847758  | 0.23005 | 0.395663 | no          |
| albD     | 2.85565                       | 3.61354                         | 0.339595             | 0.687573  | 0.32705 | 0.495016 | no          |
| dsdA     | 3.19897                       | 4.04813                         | 0.339649             | 1.00006   | 0.1519  | 0.301959 | no          |
| truA     | 27.7283                       | 35.0911                         | 0.339747             | 1.33522   | 0.0582  | 0.154127 | no          |
| luxS     | 41.3848                       | 52.3879                         | 0.340131             | 1.29775   | 0.0671  | 0.171493 | no          |
| yerI     | 33.8198                       | 42.8259                         | 0.340614             | 1.37      | 0.0525  | 0.143405 | no          |
| yvcP     | 3.34839                       | 4.24016                         | 0.340648             | 0.545578  | 0.4473  | 0.608151 | no          |
| xseB     | 15.6617                       | 19.8367                         | 0.340931             | 0.326257  | 0.65205 | 0.775578 | no          |
| deoR     | 2.08124                       | 2.63643                         | 0.341143             | 0.782371  | 0.2736  | 0.438653 | no          |
| salA     | 17.6555                       | 22.3679                         | 0.341316             | 1.34215   | 0.05665 | 0.150878 | no          |
| yflA     | 7.86528                       | 9.96497                         | 0.341368             | 1.17913   | 0.096   | 0.220458 | no          |
| yvfT     | 2.36082                       | 2.99261                         | 0.342121             | 0.870639  | 0.2176  | 0.383263 | no          |
| mdh      | 305.978                       | 388.188                         | 0.343327             | 1.2264    | 0.0813  | 0.195596 | no          |
| pssA     | 11.7985                       | 14.9685                         | 0.343333             | 0.707016  | 0.31585 | 0.484944 | no          |
| yybR     | 5.46066                       | 6.92802                         | 0.343367             | 0.660289  | 0.35195 | 0.518006 | no          |
| rsbU     | 9.80753                       | 12.4518                         | 0.344394             | 1.2377    | 0.0773  | 0.188776 | no          |

| Table S3 | value_als<br>S High<br>sorted | value_als<br>S Normal<br>sorted | log2(fold<br>change) | test_stat | p_value | q_value  | significant |
|----------|-------------------------------|---------------------------------|----------------------|-----------|---------|----------|-------------|
| yitF     | 0.228459                      | 0.290113                        | 0.344678             | 0         | 1       | 1        | no          |
| recJ     | 7.46648                       | 9.48151                         | 0.34469              | 1.35741   | 0.05425 | 0.146049 | no          |
| spoVG    | 400.551                       | 508.809                         | 0.345135             | 1.39726   | 0.04805 | 0.13644  | no          |
| yvdC     | 11.05                         | 14.0448                         | 0.345991             | 0.749424  | 0.289   | 0.458033 | no          |
| besA     | 10.4601                       | 13.295                          | 0.345996             | 1.2094    | 0.08955 | 0.209906 | no          |
| yockK    | 5.86864                       | 7.45985                         | 0.346121             | 0.821935  | 0.2452  | 0.409105 | no          |
| leuA     | 83.295                        | 105.898                         | 0.346378             | 0.861723  | 0.21715 | 0.382832 | no          |
| eno      | 132.678                       | 168.732                         | 0.346801             | 1.31102   | 0.05905 | 0.155605 | no          |
| flgD     | 35.8735                       | 45.6375                         | 0.347299             | 0.806425  | 0.2515  | 0.414797 | no          |
| ansB     | 1.8557                        | 2.36096                         | 0.347408             | 0.903081  | 0.2003  | 0.361489 | no          |
| comQ     | 9.18754                       | 11.6981                         | 0.34852              | 1.13103   | 0.1099  | 0.240903 | no          |
| yjgC     | 0.744933                      | 0.948501                        | 0.348539             | 0.837548  | 0.23005 | 0.395663 | no          |
| tatCY    | 14.1583                       | 18.0304                         | 0.348784             | 1.25581   | 0.0751  | 0.185465 | no          |
| rbfA     | 25.0213                       | 31.8689                         | 0.348991             | 1.03927   | 0.1438  | 0.291503 | no          |
| yheN     | 20.0056                       | 25.4808                         | 0.349007             | 1.35607   | 0.0514  | 0.141435 | no          |
| ywjC     | 22.7093                       | 28.9329                         | 0.34943              | 0.84109   | 0.23785 | 0.403275 | no          |
| glT      | 32.7542                       | 41.7426                         | 0.349838             | 1.41459   | 0.04575 | 0.132222 | no          |
| nupP     | 3.74807                       | 4.77838                         | 0.350372             | 0.779444  | 0.2673  | 0.43189  | no          |
| spoVT    | 7.48334                       | 9.54264                         | 0.350705             | 0.929506  | 0.19465 | 0.355159 | no          |
| obg      | 21.5504                       | 27.4824                         | 0.350789             | 1.40425   | 0.0445  | 0.130018 | no          |
| yqkF     | 5.47005                       | 6.97854                         | 0.351371             | 1.05196   | 0.1403  | 0.286846 | no          |
| tcyP     | 4.02108                       | 5.13149                         | 0.351794             | 1.10701   | 0.12215 | 0.260931 | no          |
| yqaR     | 4.30334                       | 5.49304                         | 0.352147             | 0.717496  | 0.3105  | 0.47949  | no          |
| atpB     | 184.65                        | 235.749                         | 0.352458             | 1.39405   | 0.0475  | 0.136016 | no          |
| yisQ     | 0.776                         | 0.990844                        | 0.352601             | 0.667608  | 0.3481  | 0.515182 | no          |
| qdoR     | 2.09449                       | 2.67495                         | 0.35291              | 0.626463  | 0.3817  | 0.544827 | no          |
| rseP     | 21.4166                       | 27.3599                         | 0.353334             | 1.41421   | 0.0458  | 0.132264 | no          |
| sigE     | 0.3444                        | 0.440327                        | 0.354491             | 0         | 1       | 1        | no          |
| ynbB     | 4.21118                       | 5.38807                         | 0.355543             | 1.10506   | 0.12405 | 0.264643 | no          |
| yukE     | 356.399                       | 456.084                         | 0.355806             | 1.43853   | 0.03855 | 0.117501 | no          |
| prmA     | 12.5718                       | 16.0901                         | 0.355982             | 1.32132   | 0.0611  | 0.159321 | no          |
| menE     | 3.01979                       | 3.866                           | 0.356393             | 0.876875  | 0.20515 | 0.367224 | no          |
| ytmB     | 5.49667                       | 7.0385                          | 0.356711             | 0.41717   | 0.561   | 0.705311 | no          |
| tyrS     | 15.664                        | 20.0624                         | 0.357045             | 1.41225   | 0.04435 | 0.129681 | no          |
| psd      | 7.18276                       | 9.20101                         | 0.357254             | 0.748203  | 0.29145 | 0.460901 | no          |
| rsbRB    | 14.6841                       | 18.8135                         | 0.35751              | 1.32708   | 0.0578  | 0.153394 | no          |
| yycA     | 1.72725                       | 2.21377                         | 0.358026             | 1.02227   | 0.14945 | 0.29874  | no          |
| yqgA     | 504.947                       | 647.239                         | 0.358165             | 1.39643   | 0.04595 | 0.132492 | no          |
| yvrB     | 3.24765                       | 4.16465                         | 0.3588               | 0.64806   | 0.35495 | 0.519758 | no          |
| cheR     | 4.11397                       | 5.27624                         | 0.35898              | 0.941473  | 0.17865 | 0.335722 | no          |
| yIbK     | 2.64354                       | 3.39122                         | 0.359333             | 0.822225  | 0.24335 | 0.408092 | no          |
| safA     | 29.1722                       | 37.4343                         | 0.359766             | 1.44692   | 0.03905 | 0.118067 | no          |
| plsC     | 19.2879                       | 24.7528                         | 0.359902             | 1.28643   | 0.0658  | 0.169096 | no          |
| yjqB     | 1.6821                        | 2.15893                         | 0.36005              | 0.598868  | 0.3972  | 0.558203 | no          |

| Table S3 | value_als<br>S High<br>sorted | value_als<br>S Normal<br>sorted | log2(fold<br>change) | test_stat | p_value | q_value  | significant |
|----------|-------------------------------|---------------------------------|----------------------|-----------|---------|----------|-------------|
| yknY     | 35.4396                       | 45.4898                         | 0.360181             | 0.77664   | 0.26975 | 0.43472  | no          |
| rsmB     | 8.19743                       | 10.5248                         | 0.360544             | 1.05999   | 0.13705 | 0.281798 | no          |
| rpmD     | 1902.57                       | 2443.23                         | 0.36084              | 1.46467   | 0.0383  | 0.117127 | no          |
| yqxJ     | 23.1434                       | 29.7221                         | 0.360935             | 1.06834   | 0.12925 | 0.27083  | no          |
| ywpG     | 2.43832                       | 3.13202                         | 0.361206             | 0.493529  | 0.48005 | 0.635641 | no          |
| yubA     | 11.0222                       | 14.161                          | 0.361512             | 1.37522   | 0.0501  | 0.139607 | no          |
| ylmA     | 9.47963                       | 12.1806                         | 0.361686             | 1.19079   | 0.0939  | 0.217489 | no          |
| ynaF     | 3.99474                       | 5.13441                         | 0.362097             | 0.575771  | 0.4193  | 0.581384 | no          |
| yitW     | 29.0938                       | 37.4024                         | 0.362417             | 1.02989   | 0.14635 | 0.29396  | no          |
| rpoB     | 38.707                        | 49.768                          | 0.362625             | 1.38865   | 0.0478  | 0.136144 | no          |
| yvfH     | 14.2993                       | 18.3866                         | 0.362703             | 1.44415   | 0.0414  | 0.123473 | no          |
| cotC     | 1.8876                        | 2.42803                         | 0.363234             | 0.155746  | 0.76775 | 0.860636 | no          |
| yczC     | 62.6985                       | 80.6645                         | 0.363502             | 1.39273   | 0.04585 | 0.132306 | no          |
| secG     | 142.494                       | 183.378                         | 0.36392              | 1.26122   | 0.0741  | 0.183847 | no          |
| cotW     | 0.478989                      | 0.616558                        | 0.364244             | 0.1562    | 0.76775 | 0.860636 | no          |
| bceS     | 3.25069                       | 4.18492                         | 0.364455             | 0.855732  | 0.21595 | 0.381256 | no          |
| icd      | 156.647                       | 201.714                         | 0.364789             | 1.34471   | 0.0551  | 0.147804 | no          |
| frr      | 32.115                        | 41.3598                         | 0.364983             | 1.40013   | 0.04505 | 0.130806 | no          |
| yqgU     | 8.47826                       | 10.9223                         | 0.365434             | 1.2906    | 0.06325 | 0.164353 | no          |
| mraW     | 16.051                        | 20.6814                         | 0.36567              | 1.40604   | 0.0451  | 0.13085  | no          |
| ymfH     | 10.3321                       | 13.3225                         | 0.366724             | 1.02806   | 0.14565 | 0.293184 | no          |
| ytoP     | 7.59325                       | 9.79188                         | 0.366868             | 1.26733   | 0.07535 | 0.18596  | no          |
| yrpD     | 20.8791                       | 26.9321                         | 0.367271             | 1.38876   | 0.0481  | 0.136478 | no          |
| dapL     | 11.7973                       | 15.2222                         | 0.367725             | 1.40335   | 0.0476  | 0.136144 | no          |
| yplQ     | 5.00427                       | 6.4584                          | 0.368017             | 0.951652  | 0.1799  | 0.336884 | no          |
| bkdR     | 2.37071                       | 3.0613                          | 0.368825             | 1.14837   | 0.1029  | 0.23088  | no          |
| uup      | 2.23675                       | 2.88982                         | 0.369576             | 1.1018    | 0.12035 | 0.257824 | no          |
| pgi      | 31.5318                       | 40.7514                         | 0.370046             | 1.49714   | 0.03295 | 0.105248 | no          |
| atpF     | 138.007                       | 178.377                         | 0.370189             | 1.11545   | 0.10705 | 0.237055 | no          |
| yueF     | 4.12515                       | 5.33189                         | 0.3702               | 1.09173   | 0.1295  | 0.271155 | no          |
| bkdAA    | 8.31605                       | 10.7495                         | 0.370306             | 1.27191   | 0.06885 | 0.174769 | no          |
| yqkB     | 27.0145                       | 34.9226                         | 0.370426             | 0.645977  | 0.3545  | 0.519507 | no          |
| ycnI     | 13.5292                       | 17.4949                         | 0.370859             | 1.22324   | 0.08605 | 0.204125 | no          |
| dhbA     | 14.2673                       | 18.4524                         | 0.371093             | 1.35211   | 0.05055 | 0.140233 | no          |
| nhaC     | 3.13134                       | 4.05027                         | 0.37124              | 1.09768   | 0.1241  | 0.264643 | no          |
| splB     | 2.89856                       | 3.75116                         | 0.371998             | 0.986622  | 0.1647  | 0.319475 | no          |
| sspE     | 24.1361                       | 31.243                          | 0.372338             | 0.850513  | 0.22825 | 0.393847 | no          |
| epsM     | 4.41934                       | 5.72306                         | 0.372954             | 0.487031  | 0.49265 | 0.645881 | no          |
| yoeC     | 1.49292                       | 1.93367                         | 0.373208             | 0.553443  | 0.42655 | 0.587943 | no          |
| ezrA     | 16.5367                       | 21.4189                         | 0.373213             | 1.49694   | 0.0325  | 0.104616 | no          |
| ruvA     | 4.31939                       | 5.59534                         | 0.373396             | 0.891082  | 0.2063  | 0.368753 | no          |
| atpD     | 115.362                       | 149.44                          | 0.373398             | 1.41391   | 0.0441  | 0.129355 | no          |
| ywrO     | 16.1143                       | 20.8764                         | 0.373535             | 1.21069   | 0.08875 | 0.208554 | no          |
| yrzS     | 21.3509                       | 27.6688                         | 0.373961             | 0.377226  | 0.58835 | 0.727753 | no          |

| Table S3 | value_als<br>S High<br>sorted | value_als<br>S Normal<br>sorted | log2(fold<br>change) | test_stat | p_value | q_value  | significant |
|----------|-------------------------------|---------------------------------|----------------------|-----------|---------|----------|-------------|
| yxjG     | 37.1755                       | 48.178                          | 0.374022             | 1.51244   | 0.03215 | 0.103938 | no          |
| rdgB     | 17.3632                       | 22.5022                         | 0.374036             | 1.30374   | 0.0666  | 0.170682 | no          |
| ylqD     | 12.3003                       | 15.9436                         | 0.374284             | 0.971032  | 0.16635 | 0.321673 | no          |
| ywcB     | 4.87494                       | 6.31906                         | 0.374327             | 0.371361  | 0.57205 | 0.71511  | no          |
| carB     | 21.4049                       | 27.7476                         | 0.374422             | 1.02789   | 0.1429  | 0.290151 | no          |
| yraA     | 12.1532                       | 15.7561                         | 0.374583             | 1.11008   | 0.11965 | 0.256471 | no          |
| bmrU     | 2.02445                       | 2.62478                         | 0.37467              | 0.82449   | 0.2446  | 0.408735 | no          |
| yxxB     | 1.16765                       | 1.5144                          | 0.375139             | 0.640313  | 0.35885 | 0.523621 | no          |
| purE     | 34.3368                       | 44.538                          | 0.37528              | 0.390353  | 0.5617  | 0.705479 | no          |
| vpr      | 2.29345                       | 2.97516                         | 0.375447             | 1.20594   | 0.09375 | 0.217295 | no          |
| ykuU     | 11.3337                       | 14.7062                         | 0.375805             | 1.12875   | 0.109   | 0.239415 | no          |
| yxxE     | 17.9561                       | 23.2993                         | 0.37581              | 0.930391  | 0.187   | 0.345672 | no          |
| ycgK     | 0.562811                      | 0.730472                        | 0.376179             | 0.519735  | 0.46325 | 0.620881 | no          |
| yufK     | 16.088                        | 20.8922                         | 0.376981             | 1.25211   | 0.07915 | 0.192163 | no          |
| rplGB    | 1038.78                       | 1349.31                         | 0.377336             | 1.51565   | 0.03005 | 0.098427 | no          |
| rpoE     | 55.7784                       | 72.4532                         | 0.377343             | 1.49014   | 0.03445 | 0.108189 | no          |
| trpS     | 10.6865                       | 13.8829                         | 0.377513             | 1.37971   | 0.04695 | 0.135063 | no          |
| ylaL     | 15.5721                       | 20.2396                         | 0.378223             | 1.17634   | 0.09985 | 0.226077 | no          |
| rph      | 13.4999                       | 17.5498                         | 0.378509             | 1.33688   | 0.059   | 0.155583 | no          |
| cspD     | 3151.64                       | 4097.9                          | 0.37878              | 1.50147   | 0.0314  | 0.102043 | no          |
| tasA     | 89.5079                       | 116.418                         | 0.379225             | 1.53666   | 0.0306  | 0.099878 | no          |
| argH     | 34.7494                       | 45.2046                         | 0.379481             | 1.12984   | 0.10825 | 0.238469 | no          |
| fadA     | 0.598497                      | 0.778616                        | 0.379567             | 0.598407  | 0.3889  | 0.551102 | no          |
| purK     | 42.8097                       | 55.7097                         | 0.379991             | 0.788615  | 0.2636  | 0.42867  | no          |
| tpiA     | 65.1259                       | 84.7564                         | 0.380091             | 0.941413  | 0.18425 | 0.342454 | no          |
| yrbF     | 153.431                       | 199.683                         | 0.380118             | 1.45765   | 0.03875 | 0.117501 | no          |
| ytiB     | 8.0669                        | 10.5005                         | 0.380371             | 0.900163  | 0.19885 | 0.359741 | no          |
| menH     | 27.0547                       | 35.2287                         | 0.380872             | 1.19797   | 0.08775 | 0.206855 | no          |
| yxeE     | 1.69545                       | 2.20794                         | 0.381029             | 0.411028  | 0.5482  | 0.694833 | no          |
| csaA     | 13.0958                       | 17.0571                         | 0.381266             | 0.914745  | 0.19745 | 0.35825  | no          |
| rttF     | 9.78893                       | 12.7507                         | 0.381359             | 1.12929   | 0.11035 | 0.241387 | no          |
| yusY     | 5.98084                       | 7.79059                         | 0.381385             | 1.30536   | 0.06495 | 0.167836 | no          |
| ytkL     | 9.86727                       | 12.8544                         | 0.381535             | 1.20527   | 0.0909  | 0.212403 | no          |
| glcF     | 1.07122                       | 1.3956                          | 0.381635             | 0.717341  | 0.30805 | 0.478079 | no          |
| yfjC     | 2.99037                       | 3.89629                         | 0.381777             | 0.908464  | 0.20065 | 0.361945 | no          |
| atpG     | 96.8868                       | 126.297                         | 0.382446             | 1.54509   | 0.02735 | 0.091674 | no          |
| walJ     | 6.55944                       | 8.55205                         | 0.382697             | 1.14863   | 0.1088  | 0.239257 | no          |
| cdsA     | 18.1765                       | 23.6988                         | 0.382744             | 1.46373   | 0.0371  | 0.1143   | no          |
| citH     | 0.124982                      | 0.162962                        | 0.382816             | 0         | 1       | 1        | no          |
| yplP     | 2.80537                       | 3.65804                         | 0.382878             | 0.987674  | 0.16255 | 0.316815 | no          |
| mtnA     | 22.2074                       | 28.9705                         | 0.383547             | 1.52628   | 0.0332  | 0.105685 | no          |
| bsuRC    | 8.9875                        | 11.7333                         | 0.384622             | 1.46633   | 0.03495 | 0.109299 | no          |
| yvrA     | 1.8489                        | 2.41477                         | 0.385218             | 0.577046  | 0.4093  | 0.571551 | no          |
| ytcl     | 9.41765                       | 12.3011                         | 0.385353             | 1.49492   | 0.03545 | 0.110125 | no          |

| Table S3 | value_als<br>S High<br>sorted | value_als<br>S Normal<br>sorted | log2(fold<br>change) | test_stat | p_value | q_value  | significant |
|----------|-------------------------------|---------------------------------|----------------------|-----------|---------|----------|-------------|
| ytxE     | 2.56776                       | 3.35557                         | 0.386045             | 0.591429  | 0.38375 | 0.546988 | no          |
| yqxC     | 17.3154                       | 22.6298                         | 0.386169             | 0.819154  | 0.24    | 0.404278 | no          |
| rplO     | 550.056                       | 718.972                         | 0.386357             | 1.47484   | 0.0354  | 0.110061 | no          |
| thiD     | 44.3876                       | 58.0204                         | 0.386404             | 1.55413   | 0.0287  | 0.095005 | no          |
| yvbH     | 7.23879                       | 9.46293                         | 0.386539             | 1.08825   | 0.11885 | 0.255303 | no          |
| sspA     | 19.0712                       | 24.9328                         | 0.386651             | 0.647007  | 0.3614  | 0.526108 | no          |
| ypzH     | 3.37711                       | 4.41554                         | 0.386798             | 0.196037  | 0.7888  | 0.874755 | no          |
| ispG     | 9.9796                        | 13.0513                         | 0.387144             | 1.44213   | 0.03965 | 0.119014 | no          |
| etfA     | 2.33785                       | 3.05754                         | 0.387187             | 0.938925  | 0.1846  | 0.342763 | no          |
| appD     | 13.2455                       | 17.325                          | 0.387347             | 0.878625  | 0.21395 | 0.378621 | no          |
| brnQ     | 1.55611                       | 2.03681                         | 0.388366             | 0.844814  | 0.23015 | 0.395663 | no          |
| metS     | 13.5904                       | 17.7976                         | 0.389093             | 1.55982   | 0.02675 | 0.089824 | no          |
| opuBC    | 10.1898                       | 13.3455                         | 0.389223             | 1.38079   | 0.0496  | 0.138628 | no          |
| thiS     | 380.248                       | 498.269                         | 0.389983             | 0.28135   | 0.69395 | 0.805474 | no          |
| mmgD     | 0.094879                      | 0.124348                        | 0.390224             | 0         | 1       | 1        | no          |
| rnhC     | 2.58097                       | 3.38272                         | 0.390272             | 0.962577  | 0.1776  | 0.334591 | no          |
| pdhB     | 74.66                         | 97.8861                         | 0.39077              | 1.58208   | 0.02575 | 0.087093 | no          |
| lgt      | 19.0925                       | 25.0345                         | 0.390914             | 1.50323   | 0.0327  | 0.104859 | no          |
| rsbT     | 26.0733                       | 34.2294                         | 0.392661             | 1.27247   | 0.0735  | 0.182844 | no          |
| fumC     | 39.9827                       | 52.5123                         | 0.39328              | 1.59521   | 0.02415 | 0.082806 | no          |
| bsuRB    | 15.2214                       | 19.9923                         | 0.393344             | 1.52646   | 0.03115 | 0.101496 | no          |
| ytoQ     | 5.31292                       | 6.98512                         | 0.394779             | 0.852638  | 0.23435 | 0.400486 | no          |
| recQ     | 5.94291                       | 7.81529                         | 0.395129             | 1.24813   | 0.0763  | 0.187191 | no          |
| pdxK     | 6.78144                       | 8.9263                          | 0.39647              | 1.2062    | 0.09225 | 0.214752 | no          |
| tnrA     | 5.03418                       | 6.62756                         | 0.396722             | 0.667806  | 0.34425 | 0.511716 | no          |
| nrdE     | 9.53929                       | 12.5598                         | 0.39686              | 1.48653   | 0.03445 | 0.108189 | no          |
| yoaD     | 7.37435                       | 9.71439                         | 0.397608             | 1.35049   | 0.0585  | 0.154702 | no          |
| rnjA     | 30.1112                       | 39.6669                         | 0.397633             | 1.61176   | 0.0228  | 0.079122 | no          |
| yhfT     | 15.689                        | 20.6697                         | 0.397765             | 1.32798   | 0.0606  | 0.15846  | no          |
| ydeS     | 3.90009                       | 5.13854                         | 0.397851             | 0.916405  | 0.1976  | 0.358348 | no          |
| tdk      | 4.64497                       | 6.11999                         | 0.39786              | 0.963916  | 0.1755  | 0.332142 | no          |
| yunG     | 3.23404                       | 4.26119                         | 0.39792              | 0.556852  | 0.4262  | 0.587895 | no          |
| ysdC     | 12.9085                       | 17.0084                         | 0.397926             | 1.52645   | 0.03025 | 0.098985 | no          |
| ywqG     | 6.99583                       | 9.21798                         | 0.397955             | 1.20747   | 0.0927  | 0.21553  | no          |
| ypdQ     | 4.41908                       | 5.82519                         | 0.398561             | 0.622083  | 0.3747  | 0.538748 | no          |
| yqhY     | 49.8506                       | 65.717                          | 0.398655             | 1.50571   | 0.0341  | 0.107542 | no          |
| ywdF     | 7.14125                       | 9.42024                         | 0.399587             | 1.23286   | 0.0805  | 0.194298 | no          |
| yycB     | 15.7335                       | 20.7584                         | 0.399858             | 1.57629   | 0.02635 | 0.088801 | no          |
| metI     | 28.6177                       | 37.7581                         | 0.399879             | 1.25094   | 0.07335 | 0.182714 | no          |
| yjcN     | 118.199                       | 156.001                         | 0.400338             | 1.5644    | 0.028   | 0.09335  | no          |
| ypdA     | 6.72561                       | 8.87968                         | 0.400842             | 1.30065   | 0.0699  | 0.176356 | no          |
| qoxC     | 126.715                       | 167.332                         | 0.401122             | 1.62422   | 0.0208  | 0.073898 | no          |
| patB     | 3.88452                       | 5.12965                         | 0.401123             | 1.18949   | 0.0925  | 0.215199 | no          |
| bipA     | 14.3437                       | 18.9467                         | 0.40153              | 1.60805   | 0.0223  | 0.077748 | no          |

| Table S3 | value_als<br>S High<br>sorted | value_als<br>S Normal<br>sorted | log2(fold<br>change) | test_stat | p_value | q_value  | significant |
|----------|-------------------------------|---------------------------------|----------------------|-----------|---------|----------|-------------|
| yheG     | 3.61427                       | 4.77507                         | 0.401818             | 0.916595  | 0.19825 | 0.359352 | no          |
| nosA     | 3.26033                       | 4.30835                         | 0.402118             | 1.06318   | 0.128   | 0.268966 | no          |
| fabL     | 13.0927                       | 17.3188                         | 0.403573             | 1.42705   | 0.04265 | 0.126193 | no          |
| fliK     | 11.0406                       | 14.6073                         | 0.403879             | 1.28477   | 0.0646  | 0.167511 | no          |
| sboA     | 28.1095                       | 37.2107                         | 0.404663             | 0.351471  | 0.6254  | 0.754456 | no          |
| yuiA     | 460.713                       | 610.384                         | 0.405849             | 1.25511   | 0.07755 | 0.189263 | no          |
| spoIVA   | 0.33042                       | 0.437823                        | 0.406049             | 0         | 1       | 1        | no          |
| sdpR     | 119.598                       | 158.506                         | 0.406352             | 0.698907  | 0.3202  | 0.48961  | no          |
| sufS     | 45.3551                       | 60.1144                         | 0.406446             | 0.857536  | 0.2162  | 0.381517 | no          |
| yabN     | 6.03447                       | 7.99885                         | 0.406566             | 1.24256   | 0.07795 | 0.18999  | no          |
| ytrC     | 3.95149                       | 5.24002                         | 0.407176             | 0.943912  | 0.1817  | 0.338895 | no          |
| rocA     | 2.97649                       | 3.94875                         | 0.407784             | 1.23783   | 0.0848  | 0.202199 | no          |
| oppB     | 13.6327                       | 18.0929                         | 0.408355             | 1.53992   | 0.02935 | 0.096558 | no          |
| plsX     | 58.7319                       | 77.9538                         | 0.408476             | 1.65345   | 0.0182  | 0.067286 | no          |
| yfmL     | 2.38354                       | 3.16468                         | 0.408956             | 1.06207   | 0.13655 | 0.281027 | no          |
| ywlE     | 9.10555                       | 12.0918                         | 0.409213             | 1.07324   | 0.12745 | 0.268473 | no          |
| yutH     | 0.776486                      | 1.0312                          | 0.40929              | 0.662062  | 0.34015 | 0.508829 | no          |
| ydzF     | 5.04452                       | 6.6996                          | 0.409357             | 0.68041   | 0.33295 | 0.500901 | no          |
| fadB     | 3.15542                       | 4.19124                         | 0.409543             | 0.997399  | 0.1589  | 0.312939 | no          |
| yteJ     | 43.3633                       | 57.5992                         | 0.409574             | 1.58855   | 0.02425 | 0.083073 | no          |
| ydgH     | 1.11398                       | 1.4805                          | 0.410353             | 1.07652   | 0.133   | 0.276362 | no          |
| rsh      | 12.7126                       | 16.8971                         | 0.410516             | 1.64817   | 0.02245 | 0.078052 | no          |
| yvrE     | 6.88276                       | 9.14861                         | 0.410565             | 1.29193   | 0.07005 | 0.176496 | no          |
| resA     | 19.5209                       | 25.9654                         | 0.411573             | 0.988771  | 0.16265 | 0.316815 | no          |
| ipi      | 2.82995                       | 3.76466                         | 0.411742             | 0.568205  | 0.4138  | 0.575682 | no          |
| xseA     | 6.82721                       | 9.08371                         | 0.411985             | 1.14748   | 0.10295 | 0.23088  | no          |
| yqhL     | 15.6005                       | 20.7613                         | 0.412305             | 1.14158   | 0.10425 | 0.232511 | no          |
| sbp      | 19.3909                       | 25.8182                         | 0.413006             | 1.18518   | 0.0954  | 0.21962  | no          |
| amyX     | 2.97474                       | 3.96226                         | 0.413556             | 1.38575   | 0.0511  | 0.141025 | no          |
| apt      | 11.532                        | 15.3611                         | 0.413642             | 1.21772   | 0.087   | 0.205476 | no          |
| gcvH     | 165.22                        | 220.302                         | 0.415094             | 1.67372   | 0.01835 | 0.067773 | no          |
| trnY-Phe | 170.901                       | 227.923                         | 0.415383             | 0.304325  | 0.63355 | 0.760663 | no          |
| fliJ     | 8.43706                       | 11.2524                         | 0.415419             | 1.05018   | 0.13475 | 0.278912 | no          |
| epsD     | 5.16599                       | 6.89238                         | 0.415958             | 0.923965  | 0.1899  | 0.349132 | no          |
| aroF     | 12.9075                       | 17.2216                         | 0.416008             | 0.976604  | 0.166   | 0.321163 | no          |
| yydI     | 45.3869                       | 60.598                          | 0.416996             | 1.66122   | 0.01855 | 0.068175 | no          |
| ywbE     | 43.8517                       | 58.5533                         | 0.417117             | 0.894537  | 0.2059  | 0.368214 | no          |
| hfq      | 72.0458                       | 96.2008                         | 0.417133             | 1.17913   | 0.09735 | 0.222327 | no          |
| yxjG     | 38.4541                       | 51.3471                         | 0.417145             | 1.5146    | 0.03085 | 0.100606 | no          |
| rapK     | 11.9944                       | 16.0172                         | 0.417261             | 1.45881   | 0.0388  | 0.117501 | no          |
| dapB     | 2.74643                       | 3.6677                          | 0.417321             | 0.983196  | 0.16425 | 0.318768 | no          |
| yosP     | 1.83296                       | 2.44787                         | 0.417353             | 0.948185  | 0.1784  | 0.335722 | no          |
| birA     | 2.71908                       | 3.63309                         | 0.418078             | 0.791481  | 0.271   | 0.435955 | no          |
| rplQ     | 937.128                       | 1252.46                         | 0.418447             | 1.56658   | 0.02595 | 0.08769  | no          |

| Table S3 | value_als<br>S High<br>sorted | value_als<br>S Normal<br>sorted | log2(fold<br>change) | test_stat | p_value | q_value  | significant |
|----------|-------------------------------|---------------------------------|----------------------|-----------|---------|----------|-------------|
| gndA     | 42.568                        | 56.902                          | 0.418709             | 1.69672   | 0.0169  | 0.064656 | no          |
| folD     | 32.2562                       | 43.1378                         | 0.419379             | 1.67573   | 0.01705 | 0.064898 | no          |
| dapH     | 44.957                        | 60.1399                         | 0.419777             | 1.68179   | 0.017   | 0.064774 | no          |
| rsbS     | 27.8147                       | 37.2184                         | 0.420169             | 1.31742   | 0.0653  | 0.168275 | no          |
| yxzG     | 56.6787                       | 75.8642                         | 0.420613             | 1.6453    | 0.01905 | 0.069398 | no          |
| yueC     | 12.477                        | 16.7006                         | 0.42063              | 1.20399   | 0.09075 | 0.212186 | no          |
| braB     | 5.46448                       | 7.32003                         | 0.421765             | 1.43581   | 0.04495 | 0.130719 | no          |
| ykvY     | 10.348                        | 13.8681                         | 0.422411             | 1.57271   | 0.02645 | 0.088977 | no          |
| hprT     | 27.9639                       | 37.4765                         | 0.42242              | 1.05633   | 0.13455 | 0.278652 | no          |
| ywoF     | 5.55583                       | 7.4468                          | 0.422618             | 1.46947   | 0.0387  | 0.117501 | no          |
| epsO     | 5.86503                       | 7.86162                         | 0.42269              | 1.02099   | 0.14465 | 0.292116 | no          |
| xynD     | 2.54508                       | 3.41179                         | 0.422815             | 1.23399   | 0.08405 | 0.201052 | no          |
| tufA     | 744.132                       | 997.56                          | 0.422844             | 1.67449   | 0.0178  | 0.066399 | no          |
| folEA    | 15.1792                       | 20.3508                         | 0.42299              | 1.40275   | 0.0502  | 0.139781 | no          |
| sinR     | 16.9086                       | 22.6736                         | 0.423256             | 1.11066   | 0.11775 | 0.253709 | no          |
| valS     | 12.1811                       | 16.3393                         | 0.423695             | 1.70905   | 0.0174  | 0.065761 | no          |
| ywbD     | 4.27108                       | 5.73141                         | 0.42429              | 1.30216   | 0.0718  | 0.179934 | no          |
| yqgX     | 21.2464                       | 28.515                          | 0.424503             | 1.57185   | 0.024   | 0.082443 | no          |
| yyzG     | 4.04726                       | 5.43192                         | 0.424516             | 0.370148  | 0.7142  | 0.822839 | no          |
| ytzH     | 9.50169                       | 12.7533                         | 0.424616             | 0.766609  | 0.28085 | 0.44816  | no          |
| argG     | 32.2995                       | 43.3701                         | 0.42519              | 1.11532   | 0.1144  | 0.248319 | no          |
| hisZ     | 15.1232                       | 20.3109                         | 0.425491             | 0.832447  | 0.2277  | 0.393684 | no          |
| yitM     | 10.0786                       | 13.5412                         | 0.426065             | 1.17102   | 0.09585 | 0.220249 | no          |
| gerAA    | 0.575587                      | 0.773358                        | 0.426102             | 0.579157  | 0.4087  | 0.571354 | no          |
| fbaA     | 225.027                       | 302.365                         | 0.426192             | 1.60158   | 0.02455 | 0.08387  | no          |
| rocG     | 2.85418                       | 3.83584                         | 0.426464             | 1.21021   | 0.0918  | 0.214104 | no          |
| spoIVFA  | 0.227453                      | 0.30584                         | 0.42721              | 0         | 1       | 1        | no          |
| lspA     | 9.59988                       | 12.9088                         | 0.427263             | 1.15235   | 0.10675 | 0.236842 | no          |
| oppC     | 19.3896                       | 26.0757                         | 0.427424             | 1.67327   | 0.0189  | 0.069121 | no          |
| yccF     | 14.1002                       | 18.9655                         | 0.427657             | 1.65681   | 0.01895 | 0.069168 | no          |
| thiN     | 4.61674                       | 6.20981                         | 0.427674             | 1.08362   | 0.12625 | 0.266941 | no          |
| atpH     | 92.8889                       | 124.997                         | 0.428319             | 1.12756   | 0.10575 | 0.235182 | no          |
| hisl     | 48.6199                       | 65.4393                         | 0.42861              | 0.875883  | 0.2168  | 0.382395 | no          |
| rpsJ     | 505.137                       | 680.094                         | 0.42906              | 1.73614   | 0.01465 | 0.058133 | no          |
| ecsC     | 9.15553                       | 12.3316                         | 0.429651             | 1.35472   | 0.0538  | 0.145361 | no          |
| yshE     | 27.9839                       | 37.6925                         | 0.429682             | 1.42901   | 0.0474  | 0.135938 | no          |
| rplJ     | 233.733                       | 314.845                         | 0.42978              | 1.72997   | 0.01365 | 0.054983 | no          |
| fnr      | 3.143                         | 4.2343                          | 0.429979             | 1.00333   | 0.16355 | 0.318071 | no          |
| cgeB     | 0.086778                      | 0.116921                        | 0.430128             | 0         | 1       | 1        | no          |
| yvdB     | 0.769301                      | 1.03698                         | 0.430773             | 0.867787  | 0.21815 | 0.383684 | no          |
| ycsF     | 4.16084                       | 5.60901                         | 0.43087              | 1.14447   | 0.10815 | 0.238469 | no          |
| pgcA     | 10.8804                       | 14.6794                         | 0.43207              | 1.71073   | 0.0177  | 0.066279 | no          |
| rpmC     | 1803.57                       | 2434.44                         | 0.432735             | 1.05573   | 0.13025 | 0.272219 | no          |
| yvrH     | 4.23224                       | 5.7136                          | 0.432976             | 0.788211  | 0.26825 | 0.433238 | no          |

| Table S3 | value_als<br>S High<br>sorted | value_als<br>S Normal<br>sorted | log2(fold<br>change) | test_stat | p_value | q_value  | significant |
|----------|-------------------------------|---------------------------------|----------------------|-----------|---------|----------|-------------|
| qoxD     | 96.2114                       | 129.894                         | 0.433055             | 1.70551   | 0.01685 | 0.064531 | no          |
| yuiF     | 8.74662                       | 11.8094                         | 0.433134             | 1.63055   | 0.0189  | 0.069121 | no          |
| yutK     | 2.0699                        | 2.79508                         | 0.433328             | 1.10918   | 0.1172  | 0.25267  | no          |
| skfE     | 38.6568                       | 52.2031                         | 0.433416             | 1.72955   | 0.0142  | 0.056953 | no          |
| ybfP     | 6.12017                       | 8.2655                          | 0.433528             | 1.32956   | 0.06135 | 0.159861 | no          |
| rplW     | 835.7                         | 1129.09                         | 0.434101             | 1.06564   | 0.1278  | 0.268697 | no          |
| pheS     | 12.6075                       | 17.0522                         | 0.435679             | 1.65575   | 0.02025 | 0.072357 | no          |
| hslR     | 26.0687                       | 35.2851                         | 0.436742             | 1.06543   | 0.1353  | 0.279585 | no          |
| pgm      | 41.9738                       | 56.8343                         | 0.437275             | 1.35153   | 0.05315 | 0.144336 | no          |
| bkdAB    | 6.25318                       | 8.46816                         | 0.437459             | 1.39272   | 0.0508  | 0.140613 | no          |
| ytrE     | 4.93264                       | 6.68129                         | 0.437767             | 0.755349  | 0.2801  | 0.447154 | no          |
| aspB     | 62.5463                       | 84.7308                         | 0.437961             | 1.76963   | 0.0123  | 0.050693 | no          |
| lctP     | 11.7608                       | 15.934                          | 0.438121             | 1.73421   | 0.0149  | 0.058688 | no          |
| cspC     | 170.793                       | 231.426                         | 0.438299             | 1.41891   | 0.0448  | 0.130588 | no          |
| ynel     | 7.01334                       | 9.50393                         | 0.438422             | 0.911891  | 0.199   | 0.359754 | no          |
| ywdK     | 10.995                        | 14.9033                         | 0.438777             | 1.07528   | 0.13065 | 0.272645 | no          |
| tpx      | 40.2835                       | 54.6033                         | 0.438801             | 1.69216   | 0.0145  | 0.057783 | no          |
| murE     | 11.348                        | 15.3821                         | 0.43881              | 1.72365   | 0.0171  | 0.065022 | no          |
| epsE     | 4.84416                       | 6.56687                         | 0.438961             | 0.775028  | 0.2757  | 0.441801 | no          |
| tenI     | 110.759                       | 150.191                         | 0.439385             | 0.682755  | 0.3303  | 0.498722 | no          |
| appA     | 47.204                        | 64.0204                         | 0.439623             | 1.37709   | 0.0475  | 0.136016 | no          |
| ilvH     | 80.568                        | 109.295                         | 0.439942             | 0.860291  | 0.2219  | 0.387184 | no          |
| yybF     | 2.78279                       | 3.77565                         | 0.440193             | 1.22197   | 0.08385 | 0.200831 | no          |
| ykvl     | 0.191175                      | 0.259449                        | 0.440554             | 0         | 1       | 1        | no          |
| ecfT     | 15.8488                       | 21.5111                         | 0.44071              | 1.2531    | 0.07105 | 0.178654 | no          |
| ptsl     | 89.0191                       | 120.835                         | 0.440852             | 1.35542   | 0.0539  | 0.145421 | no          |
| yvcR     | 4.28324                       | 5.81453                         | 0.440959             | 0.813671  | 0.25005 | 0.414235 | no          |
| ffh      | 42.344                        | 57.5204                         | 0.441918             | 1.78957   | 0.01265 | 0.05185  | no          |
| epsF     | 2.90324                       | 3.94561                         | 0.442586             | 0.730496  | 0.3036  | 0.473337 | no          |
| ypmT     | 18.0342                       | 24.5127                         | 0.442794             | 0.645788  | 0.3531  | 0.518954 | no          |
| yjjA     | 6.43022                       | 8.74076                         | 0.442892             | 1.34264   | 0.05995 | 0.157421 | no          |
| mtnD     | 45.2635                       | 61.532                          | 0.442989             | 1.74412   | 0.0137  | 0.055125 | no          |
| pyrH     | 34.1831                       | 46.4698                         | 0.44301              | 1.7582    | 0.0129  | 0.052586 | no          |
| hemB     | 9.63535                       | 13.1044                         | 0.44364              | 1.01882   | 0.14595 | 0.293414 | no          |
| yabJ     | 108.65                        | 147.772                         | 0.443687             | 1.35667   | 0.0511  | 0.141025 | no          |
| dps      | 79.5992                       | 108.276                         | 0.443887             | 1.76691   | 0.01255 | 0.051496 | no          |
| natK     | 1.72294                       | 2.34384                         | 0.443997             | 0.963443  | 0.17585 | 0.332468 | no          |
| ypbD     | 10.3123                       | 14.0336                         | 0.444524             | 1.08378   | 0.12455 | 0.265148 | no          |
| divIVA   | 18.0347                       | 24.5471                         | 0.444777             | 1.45914   | 0.0418  | 0.124467 | no          |
| rplL     | 621.134                       | 845.622                         | 0.445108             | 1.74447   | 0.0128  | 0.052292 | no          |
| ybdG     | 5.26999                       | 7.17748                         | 0.445677             | 1.3634    | 0.0562  | 0.150001 | no          |
| yfiJ     | 1.40372                       | 1.91181                         | 0.445689             | 0.88782   | 0.21205 | 0.376416 | no          |
| rnc      | 23.3831                       | 31.8506                         | 0.445852             | 1.73404   | 0.01455 | 0.057859 | no          |
| yhfK     | 6.74832                       | 9.19378                         | 0.44613              | 1.25916   | 0.07485 | 0.185215 | no          |



| Table S3 | value_als<br>S High<br>sorted | value_als<br>S Normal<br>sorted | log2(fold<br>change) | test_stat | p_value | q_value  | significant |
|----------|-------------------------------|---------------------------------|----------------------|-----------|---------|----------|-------------|
| ywjB     | 16.628                        | 22.6574                         | 0.446374             | 1.47064   | 0.0388  | 0.117501 | no          |
| rapF     | 120.597                       | 164.354                         | 0.446616             | 1.70021   | 0.01425 | 0.057092 | no          |
| yhaQ     | 12.376                        | 16.8726                         | 0.447133             | 1.2581    | 0.0724  | 0.180952 | no          |
| yraN     | 2.14933                       | 2.93295                         | 0.448465             | 1.00752   | 0.15785 | 0.311528 | no          |
| yybK     | 11.8358                       | 16.1558                         | 0.448889             | 0.807561  | 0.2514  | 0.414797 | no          |
| ytzE     | 18.5113                       | 25.2703                         | 0.449039             | 0.806043  | 0.25665 | 0.420321 | no          |
| yfnC     | 5.20504                       | 7.10572                         | 0.449071             | 1.47334   | 0.03945 | 0.118604 | no          |
| ftsL     | 12.8965                       | 17.6101                         | 0.449422             | 0.694622  | 0.3246  | 0.492906 | no          |
| citR     | 1.02637                       | 1.40251                         | 0.450468             | 0.768164  | 0.2833  | 0.451105 | no          |
| menB     | 16.2981                       | 22.2787                         | 0.450959             | 1.69953   | 0.01645 | 0.063259 | no          |
| resB     | 7.02329                       | 9.60846                         | 0.452157             | 1.37208   | 0.0482  | 0.136554 | no          |
| yrvC     | 6.74958                       | 9.24023                         | 0.45313              | 1.14422   | 0.10625 | 0.235872 | no          |
| appF     | 26.2191                       | 35.9111                         | 0.453813             | 1.493     | 0.03515 | 0.109649 | no          |
| kdgR     | 3.98348                       | 5.45852                         | 0.454479             | 1.3112    | 0.06505 | 0.167862 | no          |
| yjhA     | 13.7865                       | 18.8977                         | 0.454955             | 1.54372   | 0.02955 | 0.09713  | no          |
| rttL     | 2.62457                       | 3.59773                         | 0.455005             | 1.40412   | 0.0491  | 0.138369 | no          |
| yvdD     | 24.0868                       | 33.0221                         | 0.455188             | 1.68131   | 0.01665 | 0.063896 | no          |
| pdhD     | 90.2451                       | 123.778                         | 0.455838             | 1.77764   | 0.0122  | 0.050504 | no          |
| rimI     | 6.66713                       | 9.14557                         | 0.456006             | 0.824869  | 0.2489  | 0.413046 | no          |
| parE     | 6.28826                       | 8.62732                         | 0.45625              | 1.7491    | 0.01295 | 0.052675 | no          |
| tsaD     | 3.46894                       | 4.76022                         | 0.456533             | 1.11554   | 0.1143  | 0.248282 | no          |
| epsJ     | 4.96149                       | 6.80992                         | 0.456864             | 0.881831  | 0.2086  | 0.371619 | no          |
| defB     | 9.51797                       | 13.0654                         | 0.457024             | 1.33348   | 0.06015 | 0.157504 | no          |
| fabD     | 71.5649                       | 98.2629                         | 0.457395             | 1.39595   | 0.04775 | 0.136144 | no          |
| rsbX     | 34.3113                       | 47.1166                         | 0.45755              | 0.931675  | 0.1808  | 0.337554 | no          |
| ecfAB    | 12.8935                       | 17.7065                         | 0.457638             | 1.20994   | 0.08785 | 0.20696  | no          |
| skfH     | 33.585                        | 46.1609                         | 0.458854             | 1.64005   | 0.02025 | 0.072357 | no          |
| yitU     | 6.36612                       | 8.74994                         | 0.458858             | 1.38561   | 0.04935 | 0.138379 | no          |
| lutB     | 64.1335                       | 88.1751                         | 0.459292             | 1.6055    | 0.0203  | 0.072467 | no          |
| tsaB     | 8.57779                       | 11.8035                         | 0.460532             | 1.1447    | 0.10175 | 0.229291 | no          |
| yfiZ     | 4.88346                       | 6.72154                         | 0.460887             | 1.17667   | 0.0941  | 0.217701 | no          |
| ganB     | 0.155936                      | 0.214658                        | 0.461089             | 0         | 1       | 1        | no          |
| glyQ     | 15.348                        | 21.1298                         | 0.461226             | 1.0684    | 0.12755 | 0.268473 | no          |
| ytpl     | 20.6069                       | 28.3762                         | 0.461555             | 1.19273   | 0.0971  | 0.222164 | no          |
| rpsP     | 260.393                       | 358.629                         | 0.4618               | 1.51389   | 0.0319  | 0.103219 | no          |
| ymfD     | 1.07569                       | 1.48156                         | 0.461854             | 0.945854  | 0.1809  | 0.337572 | no          |
| ecsB     | 3.41226                       | 4.70043                         | 0.462067             | 1.05399   | 0.1363  | 0.280719 | no          |
| rttG     | 4.94599                       | 6.8155                          | 0.462558             | 1.624     | 0.02115 | 0.074469 | no          |
| nagR     | 3.24284                       | 4.46945                         | 0.462842             | 1.11417   | 0.11655 | 0.251559 | no          |
| sdpl     | 96.3032                       | 132.736                         | 0.462905             | 1.69483   | 0.0168  | 0.064406 | no          |
| ysnB     | 16.5621                       | 22.8379                         | 0.463542             | 1.50207   | 0.03595 | 0.1114   | no          |
| yfmG     | 162.854                       | 224.571                         | 0.463595             | 1.66704   | 0.01895 | 0.069168 | no          |
| yjnA     | 3.26135                       | 4.49791                         | 0.463787             | 1.13868   | 0.10825 | 0.238469 | no          |
| pdhC     | 131.064                       | 180.854                         | 0.464557             | 1.73768   | 0.0144  | 0.057508 | no          |

| Table S3 | value_als<br>S High<br>sorted | value_als<br>S Normal<br>sorted | log2(fold<br>change) | test_stat | p_value | q_value  | significant |
|----------|-------------------------------|---------------------------------|----------------------|-----------|---------|----------|-------------|
| yunD     | 2.36011                       | 3.25673                         | 0.46457              | 1.29191   | 0.065   | 0.167849 | no          |
| epsL     | 5.22848                       | 7.21533                         | 0.464675             | 0.617732  | 0.3838  | 0.546988 | no          |
| yqjQ     | 2.74007                       | 3.78439                         | 0.465848             | 1.08631   | 0.12615 | 0.266881 | no          |
| ykvZ     | 1.03639                       | 1.43142                         | 0.465884             | 0.844899  | 0.23915 | 0.404278 | no          |
| sipW     | 19.3434                       | 26.7181                         | 0.465974             | 1.41501   | 0.04405 | 0.12931  | no          |
| ykqA     | 8.70168                       | 12.0242                         | 0.466575             | 1.54769   | 0.0292  | 0.096234 | no          |
| yvaQ     | 1.38998                       | 1.92078                         | 0.46663              | 1.18651   | 0.09735 | 0.222327 | no          |
| yutF     | 7.96795                       | 11.0138                         | 0.467035             | 1.47347   | 0.03925 | 0.118289 | no          |
| thiL     | 3.92446                       | 5.42649                         | 0.467524             | 1.33136   | 0.06    | 0.157442 | no          |
| pksD     | 5.64501                       | 7.81133                         | 0.468593             | 0.998748  | 0.15435 | 0.305752 | no          |
| ymfF     | 8.80116                       | 12.191                          | 0.470055             | 1.23325   | 0.08075 | 0.194529 | no          |
| yrrD     | 0.835439                      | 1.15736                         | 0.470233             | 0.527209  | 0.45895 | 0.616647 | no          |
| bsdA     | 0.317715                      | 0.440226                        | 0.470513             | 0         | 1       | 1        | no          |
| ecfA     | 10.6203                       | 14.7187                         | 0.47083              | 1.6494    | 0.0191  | 0.069512 | no          |
| ssuD     | 0.08429                       | 0.116819                        | 0.470844             | 0         | 1       | 1        | no          |
| yneP     | 4.71525                       | 6.5404                          | 0.472045             | 0.851112  | 0.2304  | 0.395911 | no          |
| yvcQ     | 5.73711                       | 7.95848                         | 0.472167             | 1.38486   | 0.0494  | 0.138379 | no          |
| ycbJ     | 13.1851                       | 18.2947                         | 0.472516             | 1.77139   | 0.01245 | 0.051199 | no          |
| trnD-Cys | 3951.62                       | 5490.06                         | 0.474378             | 1.26746   | 0.0759  | 0.186454 | no          |
| yqkA     | 9.4452                        | 13.1229                         | 0.474434             | 1.36192   | 0.05295 | 0.144107 | no          |
| yydD     | 8.43465                       | 11.7229                         | 0.474931             | 1.27767   | 0.0714  | 0.179172 | no          |
| yhfl     | 8.60432                       | 11.9618                         | 0.475303             | 1.50033   | 0.0351  | 0.109649 | no          |
| yqhT     | 29.8307                       | 41.4872                         | 0.475867             | 1.67452   | 0.01575 | 0.06107  | no          |
| xpt      | 41.3939                       | 57.5844                         | 0.476261             | 1.20314   | 0.08905 | 0.208865 | no          |
| epsN     | 5.13466                       | 7.1438                          | 0.476424             | 1.22189   | 0.08585 | 0.204125 | no          |
| sspG     | 27.766                        | 38.6323                         | 0.476489             | 0.525161  | 0.4657  | 0.622824 | no          |
| resC     | 7.38295                       | 10.2754                         | 0.476929             | 1.694     | 0.01545 | 0.06022  | no          |
| ycbm     | 1.38106                       | 1.92235                         | 0.477099             | 0.947503  | 0.18235 | 0.339938 | no          |
| pnbA     | 3.67077                       | 5.11039                         | 0.477352             | 1.51511   | 0.03315 | 0.105685 | no          |
| yqgV     | 6.22701                       | 8.67305                         | 0.478                | 0.832225  | 0.2427  | 0.407483 | no          |
| kipR     | 6.01728                       | 8.38642                         | 0.478944             | 1.39229   | 0.05205 | 0.142489 | no          |
| yvbF     | 7.76285                       | 10.8321                         | 0.480661             | 1.33475   | 0.06235 | 0.16224  | no          |
| kipA     | 3.15222                       | 4.39943                         | 0.480947             | 1.30517   | 0.06745 | 0.172034 | no          |
| dgk      | 4.61976                       | 6.44761                         | 0.480947             | 0.881316  | 0.2135  | 0.378183 | no          |
| yhaM     | 4.8893                        | 6.82509                         | 0.481221             | 1.42977   | 0.0496  | 0.138628 | no          |
| ydfO     | 1.34001                       | 1.87164                         | 0.482054             | 0.951721  | 0.1794  | 0.336285 | no          |
| epsK     | 4.64089                       | 6.48253                         | 0.482155             | 1.10759   | 0.11225 | 0.244683 | no          |
| pgsA     | 11.1089                       | 15.5252                         | 0.482904             | 1.49351   | 0.0382  | 0.116917 | no          |
| thiO     | 64.623                        | 90.3302                         | 0.483162             | 0.864169  | 0.22625 | 0.391482 | no          |
| hisD     | 18.0319                       | 25.2068                         | 0.483259             | 1.09368   | 0.1191  | 0.255586 | no          |
| spcB     | 6.76087                       | 9.45123                         | 0.483293             | 1.02793   | 0.1423  | 0.289248 | no          |
| gatC     | 74.4854                       | 104.241                         | 0.484889             | 1.71071   | 0.01445 | 0.057646 | no          |
| comX     | 75.2422                       | 105.313                         | 0.485074             | 0.688782  | 0.3261  | 0.494179 | no          |
| yhcM     | 0.788405                      | 1.10399                         | 0.485723             | 0.45127   | 0.5037  | 0.654782 | no          |

| Table S3  | value_als<br>S High<br>sorted | value_als<br>S Normal<br>sorted | log2(fold<br>change) | test_stat | p_value | q_value  | significant |
|-----------|-------------------------------|---------------------------------|----------------------|-----------|---------|----------|-------------|
| yrhP      | 2.48373                       | 3.47842                         | 0.485921             | 0.990357  | 0.15875 | 0.312809 | no          |
| ykuN      | 17.8551                       | 25.0108                         | 0.486214             | 1.17188   | 0.09575 | 0.220154 | no          |
| trnS-Leu2 | 225.901                       | 316.454                         | 0.486301             | 0.586759  | 0.3985  | 0.559608 | no          |
| cheW      | 20.7297                       | 29.0485                         | 0.486766             | 1.62259   | 0.02385 | 0.082155 | no          |
| yqjF      | 1.56047                       | 2.18757                         | 0.487343             | 0.89799   | 0.2025  | 0.364052 | no          |
| yflH      | 10.6038                       | 14.8801                         | 0.488802             | 1.04229   | 0.14015 | 0.286751 | no          |
| yjbQ      | 1.79765                       | 2.52338                         | 0.489249             | 1.37804   | 0.05155 | 0.141535 | no          |
| yobT      | 1.7231                        | 2.42118                         | 0.49071              | 0.91543   | 0.19905 | 0.359754 | no          |
| ytrA      | 4.16973                       | 5.86317                         | 0.491727             | 0.580237  | 0.419   | 0.581384 | no          |
| rpIC      | 535.329                       | 752.908                         | 0.492048             | 1.76073   | 0.0133  | 0.053747 | no          |
| yuaC      | 6.26666                       | 8.81419                         | 0.492132             | 1.27468   | 0.07305 | 0.182089 | no          |
| greA      | 24.7894                       | 34.8676                         | 0.492166             | 1.72226   | 0.01535 | 0.060018 | no          |
| yydB      | 9.15116                       | 12.8742                         | 0.492453             | 1.24491   | 0.07655 | 0.18768  | no          |
| nsrR      | 11.9494                       | 16.8178                         | 0.493047             | 1.37398   | 0.0511  | 0.141025 | no          |
| yfml      | 6.71533                       | 9.4521                          | 0.493177             | 1.73346   | 0.01515 | 0.05936  | no          |
| yxeB      | 9.26487                       | 13.0411                         | 0.493217             | 1.74617   | 0.01365 | 0.054983 | no          |
| yxeC      | 30.137                        | 42.4225                         | 0.493293             | 1.66883   | 0.0199  | 0.07138  | no          |
| hmoA      | 19.1535                       | 26.9658                         | 0.493521             | 1.32668   | 0.05975 | 0.157007 | no          |
| ymzC      | 10.1037                       | 14.2298                         | 0.494032             | 0.89704   | 0.2079  | 0.370902 | no          |
| sdaAA     | 5.16993                       | 7.28306                         | 0.494402             | 1.1148    | 0.11575 | 0.250412 | no          |
| hmoB      | 11.966                        | 16.8605                         | 0.494703             | 1.4594    | 0.0432  | 0.127316 | no          |
| tapA      | 7.49002                       | 10.5578                         | 0.495267             | 1.15952   | 0.0987  | 0.224244 | no          |
| ytqA      | 3.74363                       | 5.28243                         | 0.496762             | 0.969128  | 0.16375 | 0.318294 | no          |
| yqjZ      | 25.3015                       | 35.7078                         | 0.497013             | 0.916183  | 0.19025 | 0.349603 | no          |
| ymfK      | 26.8666                       | 37.9312                         | 0.497572             | 1.28775   | 0.06995 | 0.176363 | no          |
| glyS      | 10.955                        | 15.4686                         | 0.497758             | 1.63093   | 0.02005 | 0.07178  | no          |
| epsC      | 2.42721                       | 3.42779                         | 0.497979             | 1.51182   | 0.03325 | 0.105754 | no          |
| mhqA      | 1.94004                       | 2.74043                         | 0.498311             | 1.13562   | 0.1147  | 0.248716 | no          |
| nrdI      | 11.6892                       | 16.5252                         | 0.499492             | 0.647697  | 0.36455 | 0.529455 | no          |
| ytgP      | 3.81566                       | 5.39621                         | 0.500014             | 1.66037   | 0.0194  | 0.070126 | no          |
| yhfS      | 9.50943                       | 13.4506                         | 0.500243             | 1.12409   | 0.1106  | 0.241792 | no          |
| ylmH      | 10.9992                       | 15.5608                         | 0.500516             | 1.7204    | 0.0161  | 0.062105 | no          |
| ung       | 4.15025                       | 5.87455                         | 0.501279             | 1.26775   | 0.0738  | 0.183224 | no          |
| yraK      | 1.01332                       | 1.43436                         | 0.501317             | 0.823652  | 0.24265 | 0.407483 | no          |
| ilvB      | 49.0057                       | 69.377                          | 0.501508             | 1.70488   | 0.01455 | 0.057859 | no          |
| iolF      | 0.702262                      | 0.994281                        | 0.501643             | 0.90278   | 0.2038  | 0.365684 | no          |
| rpIP      | 321.399                       | 455.421                         | 0.502837             | 1.46709   | 0.03405 | 0.107542 | no          |
| yxeH      | 8.34575                       | 11.8284                         | 0.503141             | 1.63409   | 0.0232  | 0.080212 | no          |
| yaaA      | 48.7141                       | 69.0728                         | 0.503779             | 1.2434    | 0.08225 | 0.197506 | no          |
| ispF      | 9.26001                       | 13.1402                         | 0.504905             | 0.789956  | 0.2475  | 0.411288 | no          |
| ytzG      | 2.0244                        | 2.88067                         | 0.508911             | 1.03336   | 0.14785 | 0.296494 | no          |
| yxij      | 23.487                        | 33.4304                         | 0.509302             | 1.35121   | 0.056   | 0.149681 | no          |
| dtd       | 13.3452                       | 19.0034                         | 0.509936             | 1.40083   | 0.05005 | 0.139607 | no          |
| garD      | 0.339899                      | 0.484082                        | 0.510147             | 0         | 1       | 1        | no          |

| Table S3  | value_als<br>S High<br>sorted | value_als<br>S Normal<br>sorted | log2(fold<br>change) | test_stat | p_value | q_value  | significant |
|-----------|-------------------------------|---------------------------------|----------------------|-----------|---------|----------|-------------|
| yhfP      | 4.21303                       | 6.00604                         | 0.511557             | 1.49315   | 0.0354  | 0.110061 | no          |
| rlmB      | 7.40003                       | 10.5634                         | 0.513477             | 1.33459   | 0.06065 | 0.158479 | no          |
| ylzl      | 40.9244                       | 58.432                          | 0.513798             | 0.776953  | 0.26525 | 0.429507 | no          |
| yfjF      | 4.43915                       | 6.33861                         | 0.513882             | 0.813623  | 0.2487  | 0.412915 | no          |
| tenA      | 100.796                       | 143.96                          | 0.514225             | 0.875022  | 0.21345 | 0.378183 | no          |
| ybaJ      | 7.60277                       | 10.8635                         | 0.51489              | 1.60804   | 0.02505 | 0.085422 | no          |
| minJ      | 6.38067                       | 9.1237                          | 0.515911             | 1.78201   | 0.01225 | 0.050599 | no          |
| hinT      | 13.356                        | 19.0991                         | 0.516017             | 1.48575   | 0.0367  | 0.113348 | no          |
| kbaA      | 13.3418                       | 19.0823                         | 0.516278             | 1.69861   | 0.0175  | 0.065872 | no          |
| yocC      | 2.44099                       | 3.49184                         | 0.516519             | 0.907636  | 0.1998  | 0.360761 | no          |
| cheV      | 7.99053                       | 11.4306                         | 0.516534             | 1.73474   | 0.01545 | 0.06022  | no          |
| trnB-Leu1 | 1409.22                       | 2016.39                         | 0.516872             | 1.30152   | 0.0657  | 0.168956 | no          |
| acuA      | 3.60444                       | 5.15854                         | 0.517188             | 1.20366   | 0.09105 | 0.212488 | no          |
| ylqG      | 4.39258                       | 6.28732                         | 0.517376             | 1.74902   | 0.01465 | 0.058133 | no          |
| ilvC      | 137.789                       | 197.246                         | 0.517535             | 1.32915   | 0.05795 | 0.153683 | no          |
| yesU      | 0.141589                      | 0.202692                        | 0.517574             | 0         | 1       | 1        | no          |
| buk       | 5.63104                       | 8.06253                         | 0.517831             | 1.68564   | 0.0195  | 0.070419 | no          |
| ypqE      | 13.9711                       | 20.0122                         | 0.518438             | 1.61088   | 0.024   | 0.082443 | no          |
| ypfA      | 3.70646                       | 5.31099                         | 0.51894              | 1.24893   | 0.0789  | 0.191805 | no          |
| rttM      | 12.9919                       | 18.618                          | 0.519082             | 1.51547   | 0.03265 | 0.104859 | no          |
| thiW      | 9.8733                        | 14.1602                         | 0.520239             | 1.43268   | 0.0388  | 0.117501 | no          |
| yvbl      | 11.7493                       | 16.8509                         | 0.520251             | 1.75785   | 0.0144  | 0.057508 | no          |
| yvbK      | 6.48055                       | 9.30116                         | 0.521295             | 1.26351   | 0.0759  | 0.186454 | no          |
| bioK      | 35.4012                       | 50.8693                         | 0.522996             | 1.06768   | 0.12535 | 0.265595 | no          |
| yqjV      | 2.68775                       | 3.86552                         | 0.524263             | 1.4608    | 0.03955 | 0.118809 | no          |
| ybfM      | 17.2746                       | 24.8553                         | 0.524902             | 1.17136   | 0.0976  | 0.222696 | no          |
| ytqB      | 1.99981                       | 2.87774                         | 0.525068             | 0.50586   | 0.48565 | 0.639428 | no          |
| ywlA      | 2.31961                       | 3.33828                         | 0.525221             | 0.680678  | 0.34235 | 0.509574 | no          |
| rpmH      | 607.308                       | 874.406                         | 0.525875             | 1.66381   | 0.0214  | 0.07496  | no          |
| opuAC     | 41.3895                       | 59.6025                         | 0.526106             | 1.62041   | 0.02085 | 0.073935 | no          |
| qodI      | 3.97545                       | 5.72737                         | 0.526756             | 1.52838   | 0.03345 | 0.106029 | no          |
| yxaj      | 18.1334                       | 26.1307                         | 0.527097             | 1.61263   | 0.026   | 0.087779 | no          |
| ymfK      | 7.8915                        | 11.3745                         | 0.527435             | 0.958169  | 0.1708  | 0.326892 | no          |
| ycgJ      | 0.520572                      | 0.750811                        | 0.528353             | 0.609074  | 0.3912  | 0.552336 | no          |
| thiG      | 41.9808                       | 60.5554                         | 0.528526             | 0.593451  | 0.39705 | 0.558203 | no          |
| defA      | 6.58342                       | 9.49876                         | 0.528903             | 1.31056   | 0.06965 | 0.176208 | no          |
| ypzF      | 61.4593                       | 88.734                          | 0.529856             | 0.855124  | 0.2262  | 0.391482 | no          |
| hisH      | 50.028                        | 72.2574                         | 0.530411             | 1.15758   | 0.1032  | 0.231302 | no          |
| mtnU      | 7.80619                       | 11.2772                         | 0.530718             | 1.68117   | 0.0182  | 0.067286 | no          |
| ykoS      | 0.096144                      | 0.138937                        | 0.531161             | 0         | 1       | 1        | no          |
| yybD      | 1.36712                       | 1.97679                         | 0.53202              | 0.644912  | 0.35145 | 0.517678 | no          |
| yjKB      | 1.4214                        | 2.05975                         | 0.53515              | 0.800148  | 0.2592  | 0.423383 | no          |
| yusY      | 14.2191                       | 20.6076                         | 0.535352             | 0.761582  | 0.28545 | 0.453755 | no          |
| aroB      | 17.7399                       | 25.7188                         | 0.535828             | 1.48285   | 0.03475 | 0.108856 | no          |

| Table S3 | value_als<br>S High<br>sorted | value_als<br>S Normal<br>sorted | log2(fold<br>change) | test_stat | p_value | q_value  | significant |
|----------|-------------------------------|---------------------------------|----------------------|-----------|---------|----------|-------------|
| thiX     | 11.7161                       | 16.9959                         | 0.536692             | 0.931025  | 0.17975 | 0.336772 | no          |
| ydbL     | 18.293                        | 26.5474                         | 0.537278             | 1.45238   | 0.04205 | 0.124813 | no          |
| mscL     | 19.413                        | 28.1939                         | 0.538362             | 1.62029   | 0.02185 | 0.076322 | no          |
| xkzB     | 16.175                        | 23.4955                         | 0.538624             | 0.750044  | 0.49995 | 0.652406 | no          |
| rimM     | 14.7953                       | 21.492                          | 0.538664             | 1.19843   | 0.0906  | 0.211968 | no          |
| yqfG     | 10.9463                       | 15.9125                         | 0.539715             | 1.29526   | 0.06635 | 0.170276 | no          |
| yitP     | 1.2472                        | 1.81331                         | 0.539925             | 0.493626  | 0.4928  | 0.645881 | no          |
| catE     | 1.29993                       | 1.8913                          | 0.540948             | 1.016     | 0.1525  | 0.30273  | no          |
| lrpA     | 1.60393                       | 2.3348                          | 0.541691             | 0.667193  | 0.3411  | 0.509467 | no          |
| gerBA    | 0.125281                      | 0.182433                        | 0.542206             | 0         | 1       | 1        | no          |
| ycnK     | 10.44                         | 15.2057                         | 0.542485             | 1.65408   | 0.02055 | 0.073149 | no          |
| purB     | 70.6962                       | 103.039                         | 0.543493             | 1.62225   | 0.0212  | 0.074469 | no          |
| ecsA     | 7.20903                       | 10.5184                         | 0.545033             | 1.3527    | 0.055   | 0.147642 | no          |
| yueB     | 7.48714                       | 10.9284                         | 0.545599             | 1.51594   | 0.0317  | 0.10275  | no          |
| rpe      | 8.15422                       | 11.9049                         | 0.54593              | 1.63649   | 0.02105 | 0.074292 | no          |
| hisB     | 28.3384                       | 41.3881                         | 0.546456             | 0.945197  | 0.1793  | 0.336285 | no          |
| bioD     | 55.3072                       | 80.7759                         | 0.546456             | 0.907079  | 0.19325 | 0.353468 | no          |
| ypiF     | 2.18563                       | 3.19232                         | 0.546558             | 0.840306  | 0.2448  | 0.408803 | no          |
| mlpA     | 3.4954                        | 5.10636                         | 0.546836             | 1.63053   | 0.02165 | 0.075694 | no          |
| resD     | 9.74632                       | 14.2388                         | 0.546895             | 1.20567   | 0.08595 | 0.204125 | no          |
| yfiG     | 0.233723                      | 0.341523                        | 0.547181             | 0         | 1       | 1        | no          |
| fliH     | 12.2869                       | 17.9579                         | 0.547491             | 1.09771   | 0.11955 | 0.256404 | no          |
| bshA     | 1.3443                        | 1.96495                         | 0.547633             | 0.889713  | 0.2066  | 0.368936 | no          |
| yesE     | 1.65508                       | 2.4197                          | 0.54793              | 0.683828  | 0.34    | 0.508829 | no          |
| yjcQ     | 42.3077                       | 61.9431                         | 0.550024             | 1.65866   | 0.0212  | 0.074469 | no          |
| metC     | 17.437                        | 25.5439                         | 0.550827             | 1.40245   | 0.049   | 0.138296 | no          |
| ybfF     | 2.70844                       | 3.96892                         | 0.551288             | 1.38521   | 0.05045 | 0.14006  | no          |
| appA     | 106.559                       | 156.253                         | 0.552226             | 1.36751   | 0.0494  | 0.138379 | no          |
| yqbG     | 1.07699                       | 1.57966                         | 0.552617             | 0.487308  | 0.5118  | 0.662643 | no          |
| yfhA     | 3.8997                        | 5.72714                         | 0.554451             | 1.30938   | 0.0609  | 0.159021 | no          |
| yoZ      | 35.9998                       | 52.8768                         | 0.554645             | 1.50326   | 0.03375 | 0.106799 | no          |
| ydbB     | 4.91082                       | 7.21623                         | 0.555282             | 0.840792  | 0.23475 | 0.400987 | no          |
| gudD     | 0.194003                      | 0.285133                        | 0.555553             | 0         | 1       | 1        | no          |
| fabG     | 66.4292                       | 97.707                          | 0.556644             | 1.40823   | 0.0448  | 0.130588 | no          |
| yybJ     | 13.7143                       | 20.174                          | 0.556814             | 1.00365   | 0.1562  | 0.309089 | no          |
| yhaI     | 10.9962                       | 16.1783                         | 0.557059             | 0.625747  | 0.3787  | 0.542691 | no          |
| opuBD    | 6.66784                       | 9.81082                         | 0.557154             | 1.61823   | 0.02525 | 0.085947 | no          |
| yraJ     | 3.80728                       | 5.60332                         | 0.557523             | 0.912191  | 0.196   | 0.356659 | no          |
| ywID     | 0.7702                        | 1.1349                          | 0.559258             | 0.611488  | 0.37415 | 0.538165 | no          |
| mccB     | 1.8737                        | 2.76674                         | 0.562295             | 1.37263   | 0.05135 | 0.141402 | no          |
| yocB     | 1.36296                       | 2.01965                         | 0.567365             | 1.03827   | 0.1443  | 0.291984 | no          |
| ykkC     | 1.5452                        | 2.28975                         | 0.567396             | 0.540894  | 0.4628  | 0.620724 | no          |
| spoOB    | 10.5393                       | 15.6196                         | 0.567577             | 1.73627   | 0.0149  | 0.058688 | no          |
| yacP     | 14.8349                       | 21.9859                         | 0.567583             | 1.80946   | 0.01235 | 0.050843 | no          |

| Table S3 | value_als<br>S High<br>sorted | value_als<br>S Normal<br>sorted | log2(fold<br>change) | test_stat | p_value | q_value  | significant |
|----------|-------------------------------|---------------------------------|----------------------|-----------|---------|----------|-------------|
| ylxF     | 8.69286                       | 12.8866                         | 0.567972             | 1.69938   | 0.0177  | 0.066279 | no          |
| yxjN     | 3.79286                       | 5.62425                         | 0.568373             | 1.15477   | 0.1075  | 0.237518 | no          |
| sirC     | 42.6172                       | 63.3253                         | 0.571349             | 1.28852   | 0.0684  | 0.173864 | no          |
| ywqM     | 1.26043                       | 1.87293                         | 0.571374             | 1.07525   | 0.131   | 0.272661 | no          |
| ymfJ     | 1.57054                       | 2.33503                         | 0.572185             | 0.533847  | 0.6151  | 0.749174 | no          |
| purS     | 224.439                       | 334.342                         | 0.575                | 0.482877  | 0.4834  | 0.637853 | no          |
| bioY     | 8.15861                       | 12.1655                         | 0.576398             | 1.63945   | 0.0211  | 0.074398 | no          |
| yzkC     | 5.33182                       | 7.95113                         | 0.576532             | 1.24498   | 0.08055 | 0.194298 | no          |
| mgsA     | 9.87744                       | 14.7508                         | 0.578584             | 1.18425   | 0.0967  | 0.221656 | no          |
| cydB     | 1.61742                       | 2.4156                          | 0.578686             | 0.830315  | 0.24025 | 0.404278 | no          |
| ydbM     | 3.95862                       | 5.91577                         | 0.579568             | 1.7505    | 0.0134  | 0.054093 | no          |
| yuiC     | 1.72146                       | 2.57608                         | 0.581545             | 1.05688   | 0.13895 | 0.284554 | no          |
| yxdl     | 0.235806                      | 0.353099                        | 0.582467             | 0         | 1       | 1        | no          |
| iscSB    | 2.63598                       | 3.94827                         | 0.582882             | 1.57772   | 0.0255  | 0.086561 | no          |
| epsG     | 4.70244                       | 7.04893                         | 0.583994             | 1.24687   | 0.07835 | 0.190716 | no          |
| aldX     | 1.62745                       | 2.44036                         | 0.58448              | 1.45073   | 0.0449  | 0.130719 | no          |
| yoyD     | 246.283                       | 369.863                         | 0.586676             | 0.932745  | 0.1933  | 0.353468 | no          |
| hprK     | 4.49348                       | 6.74928                         | 0.586902             | 1.71058   | 0.01735 | 0.065761 | no          |
| yhdJ     | 4.77568                       | 7.17604                         | 0.587482             | 1.2142    | 0.087   | 0.205476 | no          |
| skfC     | 37.7057                       | 56.7109                         | 0.588842             | 1.34314   | 0.0588  | 0.155275 | no          |
| ytwl     | 3.29377                       | 4.95462                         | 0.589032             | 1.1212    | 0.115   | 0.249222 | no          |
| yfjD     | 4.27875                       | 6.44684                         | 0.591402             | 1.38483   | 0.0558  | 0.14936  | no          |
| trnI-Thr | 504.927                       | 760.976                         | 0.591778             | 0.764341  | 0.2689  | 0.433725 | no          |
| yydH     | 28.4654                       | 42.9769                         | 0.594348             | 1.33236   | 0.0596  | 0.156944 | no          |
| ymbD     | 11.7747                       | 17.779                          | 0.594488             | 1.73556   | 0.01505 | 0.059154 | no          |
| ohrA     | 7.11339                       | 10.7456                         | 0.595134             | 1.40905   | 0.0487  | 0.137762 | no          |
| ymbB     | 1.64752                       | 2.49091                         | 0.596374             | 1.23407   | 0.08455 | 0.20186  | no          |
| ylqC     | 142.635                       | 215.703                         | 0.596714             | 1.18848   | 0.09525 | 0.21962  | no          |
| yrdK     | 2.68964                       | 4.07113                         | 0.598019             | 0.458093  | 0.53445 | 0.683671 | no          |
| suhB     | 5.32187                       | 8.06185                         | 0.599179             | 1.7406    | 0.01475 | 0.058344 | no          |
| ykoA     | 6.93486                       | 10.5094                         | 0.599746             | 0.920587  | 0.19295 | 0.353347 | no          |
| thiF     | 43.6017                       | 66.0831                         | 0.599896             | 0.845069  | 0.23365 | 0.40001  | no          |
| yvbG     | 4.57215                       | 6.93408                         | 0.600833             | 1.53269   | 0.0303  | 0.098985 | no          |
| yhaP     | 7.26541                       | 11.0254                         | 0.601712             | 1.65757   | 0.01885 | 0.069074 | no          |
| fliL     | 16.8831                       | 25.6208                         | 0.601739             | 1.55906   | 0.0287  | 0.095005 | no          |
| yvnA     | 3.95303                       | 6.00319                         | 0.602772             | 1.22773   | 0.083   | 0.199051 | no          |
| nagA     | 3.34298                       | 5.07717                         | 0.60289              | 1.55755   | 0.0275  | 0.092012 | no          |
| ctaE     | 17.8499                       | 27.2032                         | 0.607857             | 1.38175   | 0.04925 | 0.138379 | no          |
| yobV     | 1.39337                       | 2.12399                         | 0.608197             | 1.2413    | 0.08565 | 0.203835 | no          |
| ygaN     | 1.71491                       | 2.61736                         | 0.609977             | 0.980226  | 0.1671  | 0.322622 | no          |
| rapE     | 1.10872                       | 1.69576                         | 0.613037             | 0.953503  | 0.16905 | 0.32521  | no          |
| ypul     | 5.25358                       | 8.03841                         | 0.613609             | 1.51517   | 0.03585 | 0.111183 | no          |
| yuzC     | 1.01483                       | 1.55286                         | 0.613688             | 0.411497  | 0.56075 | 0.705311 | no          |
| yubD     | 1.06955                       | 1.63739                         | 0.614393             | 1.40212   | 0.052   | 0.142456 | no          |

| Table S3 | value_als<br>S High<br>sorted | value_als<br>S Normal<br>sorted | log2(fold<br>change) | test_stat | p_value | q_value  | significant |
|----------|-------------------------------|---------------------------------|----------------------|-----------|---------|----------|-------------|
| ydgC     | 13.1909                       | 20.2109                         | 0.615596             | 1.55418   | 0.02765 | 0.092431 | no          |
| yerC     | 16.1525                       | 24.7562                         | 0.616036             | 1.53507   | 0.0328  | 0.104859 | no          |
| ydjG     | 21.6678                       | 33.2147                         | 0.616267             | 1.75571   | 0.01275 | 0.052202 | no          |
| nasE     | 9.53855                       | 14.6355                         | 0.617633             | 1.31521   | 0.0692  | 0.175539 | no          |
| ycbK     | 1.74733                       | 2.68259                         | 0.618477             | 1.36655   | 0.05385 | 0.145391 | no          |
| yrdN     | 0.717539                      | 1.10354                         | 0.621005             | 0.503332  | 0.47255 | 0.629505 | no          |
| trmD     | 9.66284                       | 14.8653                         | 0.621433             | 1.44764   | 0.0418  | 0.124467 | no          |
| hisF     | 25.0518                       | 38.5415                         | 0.621498             | 1.10603   | 0.12105 | 0.259175 | no          |
| adk      | 354.742                       | 546.206                         | 0.622676             | 1.64747   | 0.0182  | 0.067286 | no          |
| hisA     | 27.9089                       | 43.0028                         | 0.623703             | 1.14939   | 0.1035  | 0.231557 | no          |
| czrA     | 12.8737                       | 19.8434                         | 0.624233             | 1.48588   | 0.0389  | 0.117709 | no          |
| yrpE     | 0.267033                      | 0.411704                        | 0.624591             | 0         | 1       | 1        | no          |
| niaR     | 11.4996                       | 17.7369                         | 0.625168             | 1.06924   | 0.1352  | 0.279533 | no          |
| cah      | 1.84972                       | 2.8551                          | 0.626236             | 1.41881   | 0.0501  | 0.139607 | no          |
| pduO     | 2.47376                       | 3.81884                         | 0.626426             | 1.21088   | 0.09305 | 0.216075 | no          |
| yybA     | 1.57824                       | 2.43694                         | 0.626753             | 0.861179  | 0.2317  | 0.397595 | no          |
| ganQ     | 0.742982                      | 1.14775                         | 0.627411             | 0.921549  | 0.18885 | 0.348058 | no          |
| yoZH     | 3.38728                       | 5.24105                         | 0.629729             | 0.965573  | 0.16755 | 0.323324 | no          |
| yticB    | 0.058084                      | 0.089879                        | 0.629834             | 0         | 1       | 1        | no          |
| yetK     | 8.24456                       | 12.766                          | 0.630795             | 1.59141   | 0.02315 | 0.080113 | no          |
| yphS     | 16.1065                       | 24.9421                         | 0.630941             | 1.29992   | 0.0685  | 0.173999 | no          |
| nfrAB    | 2.61224                       | 4.04676                         | 0.631481             | 1.44781   | 0.04435 | 0.129681 | no          |
| ywoC     | 2.67267                       | 4.14136                         | 0.631824             | 1.08772   | 0.12425 | 0.264811 | no          |
| slrA     | 25.9084                       | 40.156                          | 0.632194             | 0.807779  | 0.26575 | 0.429919 | no          |
| gerD     | 5.34234                       | 8.28832                         | 0.633608             | 1.58903   | 0.02615 | 0.088206 | no          |
| hisG     | 33.23                         | 51.6456                         | 0.63616              | 1.28204   | 0.06965 | 0.176208 | no          |
| yhjQ     | 0.446997                      | 0.694732                        | 0.636193             | 0.290489  | 0.5642  | 0.707792 | no          |
| coaD     | 5.91619                       | 9.20034                         | 0.637021             | 1.54577   | 0.0343  | 0.108081 | no          |
| ywzA     | 32.0614                       | 49.8983                         | 0.638157             | 1.59634   | 0.02695 | 0.090415 | no          |
| rocR     | 1.88111                       | 2.9297                          | 0.639167             | 1.64099   | 0.02095 | 0.074149 | no          |
| yncB     | 0.491307                      | 0.766253                        | 0.641197             | 0.645193  | 0.36435 | 0.529371 | no          |
| lutC     | 35.8534                       | 55.9244                         | 0.641365             | 1.08002   | 0.131   | 0.272661 | no          |
| yphP     | 3.12082                       | 4.87129                         | 0.642376             | 1.38921   | 0.04975 | 0.138943 | no          |
| yecA     | 0.794627                      | 1.24061                         | 0.642701             | 1.21411   | 0.0871  | 0.205582 | no          |
| yxzI     | 54.266                        | 84.8619                         | 0.645069             | 1.43655   | 0.0478  | 0.136144 | no          |
| ycsi     | 2.50259                       | 3.91784                         | 0.646637             | 1.48487   | 0.03755 | 0.115401 | no          |
| ybgF     | 2.11937                       | 3.31813                         | 0.646737             | 1.78452   | 0.0133  | 0.053747 | no          |
| flhF     | 6.38763                       | 10.0234                         | 0.650027             | 1.1613    | 0.1036  | 0.231642 | no          |
| ytxB     | 2.69994                       | 4.24102                         | 0.651487             | 1.41009   | 0.05145 | 0.141469 | no          |
| ywoD     | 1.18059                       | 1.85818                         | 0.654382             | 1.334     | 0.0575  | 0.152706 | no          |
| albC     | 6.45959                       | 10.1754                         | 0.655574             | 1.46797   | 0.03765 | 0.115613 | no          |
| yjzD     | 14.0068                       | 22.0705                         | 0.655993             | 0.802031  | 0.24505 | 0.409037 | no          |
| purN     | 26.1788                       | 41.2656                         | 0.656539             | 0.688182  | 0.32295 | 0.491801 | no          |
| sodC     | 2.88631                       | 4.55375                         | 0.657826             | 1.39022   | 0.05295 | 0.144107 | no          |

| Table S3 | value_als<br>S High<br>sorted | value_als<br>S Normal<br>sorted | log2(fold<br>change) | test_stat | p_value | q_value  | significant |
|----------|-------------------------------|---------------------------------|----------------------|-----------|---------|----------|-------------|
| yybM     | 20.593                        | 32.5424                         | 0.660168             | 1.66408   | 0.01805 | 0.067063 | no          |
| pbpX     | 2.0054                        | 3.18203                         | 0.666056             | 1.69451   | 0.0175  | 0.065872 | no          |
| purM     | 62.4411                       | 99.0917                         | 0.666268             | 1.58718   | 0.0224  | 0.078024 | no          |
| dctR     | 1.99853                       | 3.17274                         | 0.666788             | 1.07418   | 0.1252  | 0.265578 | no          |
| bioF     | 39.6065                       | 62.9106                         | 0.667566             | 1.38187   | 0.0493  | 0.138379 | no          |
| ywnG     | 5.95884                       | 9.46864                         | 0.668124             | 1.42115   | 0.04555 | 0.131746 | no          |
| antE     | 23.7969                       | 37.8766                         | 0.670531             | 0.632707  | 0.3733  | 0.537356 | no          |
| cheD     | 15.5327                       | 24.758                          | 0.67259              | 1.54972   | 0.0296  | 0.097209 | no          |
| mapA     | 259.693                       | 414.25                          | 0.673695             | 1.69622   | 0.01695 | 0.064715 | no          |
| yhfA     | 0.179121                      | 0.286272                        | 0.676453             | 0         | 1       | 1        | no          |
| hepT     | 6.46733                       | 10.3405                         | 0.677068             | 1.34871   | 0.0534  | 0.14491  | no          |
| opuAB    | 26.0847                       | 41.7148                         | 0.677357             | 1.63381   | 0.0193  | 0.069967 | no          |
| coaBC    | 3.18049                       | 5.09483                         | 0.679784             | 1.44671   | 0.03715 | 0.11436  | no          |
| yokI     | 0.132161                      | 0.212319                        | 0.683931             | 0         | 1       | 1        | no          |
| yusU     | 8.2202                        | 13.2322                         | 0.686812             | 1.23982   | 0.08625 | 0.20434  | no          |
| ywkF     | 3.77505                       | 6.08005                         | 0.687589             | 0.877318  | 0.21845 | 0.383855 | no          |
| moaD     | 7.24675                       | 11.6821                         | 0.688896             | 0.489516  | 0.4907  | 0.644164 | no          |
| yhfO     | 3.3879                        | 5.4704                          | 0.691253             | 1.3098    | 0.0697  | 0.176208 | no          |
| yxkD     | 1.82255                       | 2.94915                         | 0.694339             | 1.489     | 0.038   | 0.1164   | no          |
| yuxO     | 6.97376                       | 11.3093                         | 0.697507             | 1.52569   | 0.0347  | 0.108791 | no          |
| bceR     | 1.86736                       | 3.03465                         | 0.700527             | 0.91677   | 0.18905 | 0.348255 | no          |
| catD     | 5.0177                        | 8.15884                         | 0.701336             | 1.43633   | 0.0455  | 0.131746 | no          |
| ycnE     | 7.07353                       | 11.512                          | 0.702637             | 1.19281   | 0.09395 | 0.217489 | no          |
| thiV     | 22.5026                       | 36.9512                         | 0.715529             | 1.54395   | 0.0303  | 0.098985 | no          |
| yuzG     | 6.54148                       | 10.7788                         | 0.720515             | 0.334462  | 0.54595 | 0.692578 | no          |
| ywrF     | 2.43735                       | 4.02333                         | 0.723075             | 1.47911   | 0.03845 | 0.117298 | no          |
| ykuE     | 0.693217                      | 1.14467                         | 0.723558             | 1.04897   | 0.1425  | 0.289497 | no          |
| cotY     | 0.19716                       | 0.325657                        | 0.723986             | 0         | 1       | 1        | no          |
| yrhC     | 4.32486                       | 7.14498                         | 0.724275             | 0.714632  | 0.31895 | 0.488298 | no          |
| yisL     | 9.82525                       | 16.2797                         | 0.728513             | 1.7264    | 0.01695 | 0.064715 | no          |
| purQ     | 69.6666                       | 115.577                         | 0.730311             | 0.933207  | 0.1866  | 0.345196 | no          |
| yukD     | 8.65107                       | 14.3709                         | 0.732199             | 1.08527   | 0.12475 | 0.265271 | no          |
| yabP     | 15.101                        | 25.111                          | 0.733674             | 1.23353   | 0.08435 | 0.201641 | no          |
| cca      | 1.92956                       | 3.21846                         | 0.738099             | 1.40478   | 0.0508  | 0.140613 | no          |
| rarA     | 1.20612                       | 2.01292                         | 0.738919             | 1.65312   | 0.02285 | 0.079222 | no          |
| yImC     | 10.964                        | 18.3261                         | 0.741126             | 1.2614    | 0.0782  | 0.190475 | no          |
| yrvD     | 11.4663                       | 19.1659                         | 0.741139             | 1.71024   | 0.01855 | 0.068175 | no          |
| yydC     | 18.2505                       | 30.507                          | 0.741204             | 1.10447   | 0.1181  | 0.25417  | no          |
| yuzB     | 3.98867                       | 6.66976                         | 0.741727             | 0.735102  | 0.2941  | 0.463558 | no          |
| ytIC     | 0.074888                      | 0.125346                        | 0.743116             | 0         | 1       | 1        | no          |
| bshBA    | 2.1115                        | 3.53638                         | 0.744005             | 1.16803   | 0.101   | 0.228013 | no          |
| yitO     | 1.65539                       | 2.77608                         | 0.745874             | 1.1801    | 0.0949  | 0.21928  | no          |
| yfjL     | 2.78199                       | 4.66567                         | 0.745966             | 1.7026    | 0.0204  | 0.072685 | no          |
| ywiC     | 0.4284                        | 0.718814                        | 0.746658             | 0.786356  | 0.2725  | 0.437453 | no          |



| Table S3 | value_als<br>S High<br>sorted | value_als<br>S Normal<br>sorted | log2(fold<br>change) | test_stat | p_value | q_value  | significant |
|----------|-------------------------------|---------------------------------|----------------------|-----------|---------|----------|-------------|
| moeA     | 3.29751                       | 5.55173                         | 0.751563             | 1.66408   | 0.0184  | 0.067891 | no          |
| yitZ     | 4.27846                       | 7.20993                         | 0.752895             | 1.66981   | 0.0206  | 0.073258 | no          |
| srfAB    | 303.683                       | 512.087                         | 0.753822             | 1.79091   | 0.02095 | 0.074149 | no          |
| ywmE     | 27.2649                       | 45.9919                         | 0.754333             | 1.03784   | 0.1488  | 0.297759 | no          |
| yfiN     | 0.172916                      | 0.293164                        | 0.761633             | 0         | 1       | 1        | no          |
| yvfU     | 2.3875                        | 4.06087                         | 0.766291             | 1.53853   | 0.0353  | 0.109933 | no          |
| spoIVCB  | 0.792929                      | 1.34893                         | 0.766553             | 0.603032  | 0.3714  | 0.535861 | no          |
| yoaM     | 0.929852                      | 1.5822                          | 0.766859             | 1.11432   | 0.114   | 0.247774 | no          |
| tcyC     | 1.40488                       | 2.39057                         | 0.766909             | 1.41373   | 0.0525  | 0.143405 | no          |
| ywcl     | 1.16815                       | 1.98832                         | 0.76733              | 0.584485  | 0.4003  | 0.561714 | no          |
| srfAA    | 232.534                       | 396.877                         | 0.771251             | 2.01386   | 0.013   | 0.052821 | no          |
| purC     | 87.7708                       | 150.573                         | 0.778647             | 1.1864    | 0.0945  | 0.218491 | no          |
| yybL     | 10.5319                       | 18.1976                         | 0.788991             | 1.38451   | 0.05215 | 0.142658 | no          |
| cydD     | 0.444688                      | 0.770566                        | 0.793127             | 0.795053  | 0.26215 | 0.426894 | no          |
| ywhH     | 4.03294                       | 6.99876                         | 0.795269             | 1.69773   | 0.02085 | 0.073935 | no          |
| yddR     | 0.370959                      | 0.644284                        | 0.796439             | 0.799907  | 0.26095 | 0.425869 | no          |
| yxen     | 1.74792                       | 3.03872                         | 0.797827             | 1.51353   | 0.0386  | 0.117501 | no          |
| ydcF     | 0.678182                      | 1.18407                         | 0.804011             | 0.470707  | 0.618   | 0.74971  | no          |
| ypuC     | 0.621313                      | 1.08639                         | 0.806155             | 0.3113    | 0.6891  | 0.801955 | no          |
| yqaM     | 0.07643                       | 0.133687                        | 0.806651             | 0         | 1       | 1        | no          |
| gutP     | 0.449627                      | 0.78847                         | 0.810329             | 1.29188   | 0.07875 | 0.191565 | no          |
| fabZ     | 3.90685                       | 6.86735                         | 0.813749             | 1.57525   | 0.0323  | 0.104152 | no          |
| yunC     | 5.97609                       | 10.5235                         | 0.816348             | 1.3993    | 0.04935 | 0.138379 | no          |
| purF     | 44.2829                       | 78.2752                         | 0.821805             | 1.4038    | 0.0433  | 0.12751  | no          |
| yybO     | 0.420848                      | 0.745269                        | 0.82446              | 1.23977   | 0.08745 | 0.206278 | no          |
| yoaU     | 0.330681                      | 0.587665                        | 0.829553             | 0.892745  | 0.22605 | 0.391482 | no          |
| paiA     | 1.81236                       | 3.22124                         | 0.829745             | 1.36373   | 0.05665 | 0.150878 | no          |
| csbD     | 25.0625                       | 44.6589                         | 0.833417             | 1.39562   | 0.0508  | 0.140613 | no          |
| yxIA     | 0.965036                      | 1.72192                         | 0.835364             | 1.80642   | 0.01325 | 0.053661 | no          |
| ybxI     | 0.664924                      | 1.18911                         | 0.838625             | 1.15383   | 0.106   | 0.235598 | no          |
| ydzW     | 68.9126                       | 123.617                         | 0.843044             | 0.768006  | 0.3058  | 0.475576 | no          |
| yozi     | 5.19208                       | 9.31707                         | 0.843563             | 1.62871   | 0.02515 | 0.085684 | no          |
| epsI     | 3.04277                       | 5.46558                         | 0.84499              | 1.28515   | 0.07905 | 0.192045 | no          |
| ypjB     | 1.44543                       | 2.59972                         | 0.846865             | 1.64594   | 0.0277  | 0.092432 | no          |
| yceK     | 8.25829                       | 14.8923                         | 0.850649             | 1.64855   | 0.02665 | 0.089569 | no          |
| yfkK     | 15.7735                       | 28.6028                         | 0.858651             | 1.43555   | 0.04625 | 0.133254 | no          |
| yxeg     | 1.00246                       | 1.81814                         | 0.858925             | 0.921328  | 0.19885 | 0.359741 | no          |
| ytzD     | 12.3485                       | 22.4311                         | 0.861158             | 0.596235  | 0.4123  | 0.574022 | no          |
| ykkB     | 0.961097                      | 1.75156                         | 0.865885             | 1.01295   | 0.1452  | 0.292594 | no          |
| -        | 44.2142                       | 80.7254                         | 0.868512             | 1.45562   | 0.04305 | 0.127074 | no          |
| ybgG     | 1.3705                        | 2.50286                         | 0.868876             | 1.80766   | 0.01315 | 0.053372 | no          |
| adhA     | 0.220596                      | 0.403404                        | 0.870822             | 0         | 1       | 1        | no          |
| spollAB  | 2.36811                       | 4.3483                          | 0.876715             | 1.30346   | 0.0779  | 0.18999  | no          |
| gerE     | 5.70678                       | 10.5206                         | 0.882468             | 0.978699  | 0.17135 | 0.327777 | no          |

| Table S3 | value_als<br>S High<br>sorted | value_als<br>S Normal<br>sorted | log2(fold<br>change) | test_stat | p_value | q_value  | significant |
|----------|-------------------------------|---------------------------------|----------------------|-----------|---------|----------|-------------|
| ycxB     | 1.13692                       | 2.10004                         | 0.885289             | 1.23365   | 0.0863  | 0.20434  | no          |
| yycQ     | 3.13462                       | 5.81798                         | 0.892226             | 0.83875   | 0.22795 | 0.393684 | no          |
| gudP     | 0.126849                      | 0.236839                        | 0.900791             | 0         | 1       | 1        | no          |
| ymaD     | 2.13333                       | 3.98675                         | 0.902105             | 1.45092   | 0.0492  | 0.138379 | no          |
| spolIIC  | 0.567011                      | 1.06132                         | 0.904417             | 0.647223  | 0.3553  | 0.520067 | no          |
| ywnC     | 4.82842                       | 9.05649                         | 0.907401             | 1.78336   | 0.016   | 0.061847 | no          |
| ydfN     | 1.12167                       | 2.10554                         | 0.90854              | 1.38568   | 0.0587  | 0.155121 | no          |
| yrzQ     | 3.20748                       | 6.03059                         | 0.910859             | 2.43316   | 0.5318  | 0.681513 | no          |
| ycgF     | 1.97247                       | 3.72744                         | 0.918179             | 1.76365   | 0.0174  | 0.065761 | no          |
| ydgB     | 0.277744                      | 0.525656                        | 0.920363             | 0         | 1       | 1        | no          |
| yxeF     | 3.34471                       | 6.33056                         | 0.920452             | 1.56545   | 0.03165 | 0.102677 | no          |
| ydaC     | 0.063262                      | 0.119836                        | 0.92165              | 0         | 1       | 1        | no          |
| cydC     | 0.819586                      | 1.5621                          | 0.930517             | 1.34572   | 0.0633  | 0.164369 | no          |
| rhaU     | 0.868085                      | 1.668                           | 0.94221              | 0.614112  | 0.3717  | 0.535879 | no          |
| yoze     | 11.2188                       | 21.9566                         | 0.968738             | 1.49131   | 0.042   | 0.124764 | no          |
| rtpA     | 18.0996                       | 35.4612                         | 0.970283             | 1.12166   | 0.13315 | 0.276366 | no          |
| yxzK     | 0.729048                      | 1.42857                         | 0.970486             | 0.790916  | 0.2643  | 0.429151 | no          |
| yybC     | 1.36227                       | 2.6749                          | 0.973478             | 1.34175   | 0.0728  | 0.181708 | no          |
| sspB     | 2.76703                       | 5.44879                         | 0.977598             | 1.06902   | 0.4178  | 0.580166 | no          |
| yobM     | 2.01712                       | 3.97215                         | 0.977621             | 1.78415   | 0.01575 | 0.06107  | no          |
| yvdS     | 0.644295                      | 1.27104                         | 0.980217             | 0.719087  | 0.53415 | 0.683522 | no          |
| yceJ     | 0.407702                      | 0.813573                        | 0.996756             | 1.42999   | 0.06465 | 0.167525 | no          |
| ybdZ     | 19.0712                       | 38.1901                         | 1.00181              | 1.78445   | 0.01475 | 0.058344 | no          |
| ydzS     | 21.3911                       | 42.8896                         | 1.00362              | 0.465152  | 0.3068  | 0.476535 | no          |
| yppF     | 13.9616                       | 28.0598                         | 1.00704              | 1.3293    | 0.0648  | 0.167681 | no          |
| ydzW     | 9.02233                       | 18.1342                         | 1.00714              | 0.376117  | 0.54465 | 0.691507 | no          |
| yoxC     | 3.86229                       | 7.76442                         | 1.00742              | 1.44996   | 0.04805 | 0.13644  | no          |
| ytaB     | 0.474551                      | 0.955962                        | 1.01039              | 0.818556  | 0.22145 | 0.386761 | no          |
| gerBB    | 0.197087                      | 0.402307                        | 1.02947              | 0         | 1       | 1        | no          |
| yezD     | 4.85573                       | 9.94467                         | 1.03423              | 0.640967  | 0.31625 | 0.485159 | no          |
| yxaC     | 0.416518                      | 0.853508                        | 1.03503              | 1.0419    | 0.132   | 0.274437 | no          |
| ylxH     | 7.63722                       | 15.8723                         | 1.05539              | 1.81565   | 0.01285 | 0.052439 | no          |
| yqfC     | 2.38073                       | 4.95744                         | 1.05819              | 1.0878    | 0.13315 | 0.276366 | no          |
| sboX     | 27.4059                       | 57.1498                         | 1.06026              | 1.32602   | 0.0766  | 0.18768  | no          |
| yciB     | 0.090897                      | 0.190177                        | 1.06503              | 0         | 1       | 1        | no          |
| yjfA     | 0.736184                      | 1.54633                         | 1.07071              | 1.08027   | 0.13035 | 0.272219 | no          |
| ymxH     | 2.62066                       | 5.53818                         | 1.07948              | 1.55927   | 0.1531  | 0.303598 | no          |
| rpmGcb   | 8.29953                       | 17.6616                         | 1.08951              | 0.970685  | 0.3252  | 0.493319 | no          |
| trnQ-Arg | 587.958                       | 1259.26                         | 1.09879              | 1.73423   | 0.01935 | 0.070013 | no          |
| ymaG     | 0.26923                       | 0.577585                        | 1.10119              | 0.501171  | 0.3842  | 0.547141 | no          |
| yngG     | 0.093495                      | 0.208659                        | 1.15819              | 0         | 1       | 1        | no          |
| ynaD     | 0.671799                      | 1.50256                         | 1.16132              | 1.22837   | 0.09885 | 0.224244 | no          |
| yhdC     | 0.633146                      | 1.42125                         | 1.16655              | 0.742796  | 0.29545 | 0.465097 | no          |
| sspD     | 8.36565                       | 19.3877                         | 1.21259              | 1.36869   | 0.07465 | 0.184843 | no          |

| Table S3   | value_als<br>S High<br>sorted | value_als<br>S Normal<br>sorted | log2(fold<br>change) | test_stat | p_value | q_value  | significant |
|------------|-------------------------------|---------------------------------|----------------------|-----------|---------|----------|-------------|
| yugE       | 2.2779                        | 5.43162                         | 1.25368              | 1.12953   | 0.1179  | 0.253886 | no          |
| yesY       | 0.173289                      | 0.413459                        | 1.25456              | 0         | 1       | 1        | no          |
| ysnE       | 1.0112                        | 2.41366                         | 1.25515              | 1.49017   | 0.05545 | 0.14853  | no          |
| yzkK       | 1.35123                       | 3.23033                         | 1.25741              | 1.72172   | 0.5332  | 0.682774 | no          |
| yteS       | 0.072068                      | 0.172961                        | 1.26301              | 0         | 1       | 1        | no          |
| spmB       | 0.064963                      | 0.155913                        | 1.26306              | 0         | 1       | 1        | no          |
| yvzJ       | 3.13991                       | 7.63861                         | 1.28259              | 1.6957    | 0.18665 | 0.345196 | no          |
| yuzI       | 0.795227                      | 1.96955                         | 1.30843              | 0.636695  | 0.2424  | 0.407345 | no          |
| yoZD       | 2.25044                       | 5.59427                         | 1.31374              | 1.07626   | 0.2934  | 0.463237 | no          |
| phrG       | 41.5562                       | 103.479                         | 1.3162               | 1.35509   | 0.085   | 0.202546 | no          |
| ywnA       | 1.56707                       | 3.91                            | 1.31909              | 1.75716   | 0.02895 | 0.095663 | no          |
| ytkC       | 0.171526                      | 0.433303                        | 1.33695              | 0         | 1       | 1        | no          |
| gutB       | 0.313635                      | 0.825905                        | 1.39689              | 1.74643   | 0.03125 | 0.101644 | no          |
| trnSL-Arg1 | 252.463                       | 687.469                         | 1.44522              | 1.50443   | 0.05835 | 0.154415 | no          |
| trnB-Arg   | 101.67                        | 280.93                          | 1.46632              | 1.08712   | 0.16695 | 0.322499 | no          |
| yqkE       | 2.8047                        | 7.86629                         | 1.48784              | 1.2296    | 0.11445 | 0.248319 | no          |
| yocL       | 0.921433                      | 2.59718                         | 1.49499              | 1.23655   | 0.116   | 0.250662 | no          |
| yflJ       | 11.4071                       | 32.3685                         | 1.50466              | 1.12654   | 0.15915 | 0.313035 | no          |
| yfjA       | 0.755026                      | 2.15634                         | 1.51398              | 1.56507   | 0.1707  | 0.326869 | no          |
| yhaX       | 0.032712                      | 0.101235                        | 1.62981              | 0         | 1       | 1        | no          |
| yodA       | 0.90268                       | 2.81364                         | 1.64015              | 1.63682   | 0.04355 | 0.128145 | no          |
| ycgH       | 0.076382                      | 0.250884                        | 1.71572              | 0         | 1       | 1        | no          |
| yzkV       | 1.6421                        | 5.47139                         | 1.73636              | 0.348189  | 0.35675 | 0.521576 | no          |
| ysnD       | 0.257581                      | 0.88462                         | 1.78003              | 1.10242   | 0.30335 | 0.473337 | no          |
| spoVM      | 20.1738                       | 79.5313                         | 1.97904              | 1.6674    | 0.35055 | 0.517169 | no          |
| slp        | 0.251379                      | 0.991973                        | 1.98044              | 1.44629   | 0.1698  | 0.325575 | no          |
| yyzH       | 6.06561                       | 25.4003                         | 2.06612              | 2.95148   | 0.09735 | 0.222327 | no          |
| yjzG       | 2.389                         | 10.2228                         | 2.0973               | 2.23813   | 0.16075 | 0.314427 | no          |
| acoB       | 0.026302                      | 0.112968                        | 2.10267              | 0         | 1       | 1        | no          |
| ybfE       | 1.03287                       | 4.73598                         | 2.19701              | 1.73334   | 0.0683  | 0.173846 | no          |
| ypzG       | 5.65053                       | 26.2707                         | 2.217                | 3.24234   | 0.09365 | 0.217198 | no          |
| yqaB       | 0.068655                      | 0.329543                        | 2.26303              | 0         | 1       | 1        | no          |
| ypjA       | 0.22005                       | 1.11944                         | 2.34687              | 1.61671   | 0.06645 | 0.170415 | no          |
| trnD-Leu2  | 30.0064                       | 161.089                         | 2.42452              | 2.74713   | 0.2377  | 0.403275 | no          |
| yczL       | 0.947338                      | 5.18974                         | 2.45371              | 1.88782   | 0.27275 | 0.437666 | no          |
| tIp        | 0.35156                       | 2.43954                         | 2.79477              | 1.69262   | 0.25255 | 0.41606  | no          |
| yesK       | 0.208641                      | 1.54061                         | 2.88441              | 1.47249   | 0.2484  | 0.4126   | no          |
| ygzA       | 0.691757                      | 5.27425                         | 2.93063              | 2.31699   | 0.2473  | 0.411288 | no          |
| bsdD       | 1.7275                        | 0                               | #NAME?               | #NAME?    | 0.01485 | 0.058615 | no          |
| yczF       | 2.19482                       | 0                               | #NAME?               | #NAME?    | 0.01775 | 0.066279 | no          |
| yczK       | 4.71336                       | 0                               | #NAME?               | #NAME?    | 0.01775 | 0.066279 | no          |
| yraG       | 1.36125                       | 0                               | #NAME?               | #NAME?    | 0.02555 | 0.086573 | no          |
| yzkH       | 1.60066                       | 0                               | #NAME?               | #NAME?    | 0.0328  | 0.104859 | no          |
| gerPA      | 1.67151                       | 0                               | #NAME?               | #NAME?    | 0.0328  | 0.104859 | no          |

| Table S3 | value_als<br>S High<br>sorted | value_als<br>S Normal<br>sorted | log2(fold<br>change) | test_stat | p_value | q_value  | significant |
|----------|-------------------------------|---------------------------------|----------------------|-----------|---------|----------|-------------|
| yrpDX    | 73.0835                       | 0                               | #NAME?               | #NAME?    | 0.0328  | 0.104859 | no          |
| sspJ     | 5.05176                       | 0                               | #NAME?               | #NAME?    | 0.0729  | 0.181836 | no          |
| yqzN     | 2.20485                       | 0                               | #NAME?               | #NAME?    | 0.1107  | 0.241869 | no          |
| yheF     | 6.02803                       | 0                               | #NAME?               | #NAME?    | 0.1137  | 0.247266 | no          |
| ytnI     | 1.82393                       | 0                               | #NAME?               | #NAME?    | 0.1249  | 0.265288 | no          |
| ylzJ     | 5.151                         | 0                               | #NAME?               | #NAME?    | 0.12815 | 0.268978 | no          |
| yrdD     | 9.18351                       | 0                               | #NAME?               | #NAME?    | 0.13735 | 0.282259 | no          |
| cotJA    | 0.947142                      | 0                               | #NAME?               | #NAME?    | 0.20445 | 0.366323 | no          |
| -        | 7.44669                       | 0                               | #NAME?               | #NAME?    | 0.20805 | 0.370993 | no          |
| uvrX     | 0.020734                      | 0                               | #NAME?               | 0         | 1       | 1        | no          |
| acoA     | 0.05438                       | 0                               | #NAME?               | 0         | 1       | 1        | no          |
| yclD     | 0.082766                      | 0                               | #NAME?               | 0         | 1       | 1        | no          |
| bsdB     | 0.136977                      | 0                               | #NAME?               | 0         | 1       | 1        | no          |
| yveA     | 0.140632                      | 0                               | #NAME?               | 0         | 1       | 1        | no          |
| yjgB     | 0.151269                      | 0                               | #NAME?               | 0         | 1       | 1        | no          |
| ssuA     | 0.158302                      | 0                               | #NAME?               | 0         | 1       | 1        | no          |
| ssuC     | 0.159093                      | 0                               | #NAME?               | 0         | 1       | 1        | no          |
| ykjA     | 0.164195                      | 0                               | #NAME?               | 0         | 1       | 1        | no          |
| spolIIAE | 0.170001                      | 0                               | #NAME?               | 0         | 1       | 1        | no          |
| yteR     | 0.179684                      | 0                               | #NAME?               | 0         | 1       | 1        | no          |
| ywjD     | 0.222961                      | 0                               | #NAME?               | 0         | 1       | 1        | no          |
| yjmC     | 0.225028                      | 0                               | #NAME?               | 0         | 1       | 1        | no          |
| xkdD     | 0.232652                      | 0                               | #NAME?               | 0         | 1       | 1        | no          |
| spolIIAG | 0.25858                       | 0                               | #NAME?               | 0         | 1       | 1        | no          |
| yqaK     | 0.286497                      | 0                               | #NAME?               | 0         | 1       | 1        | no          |
| yqbl     | 0.331496                      | 0                               | #NAME?               | 0         | 1       | 1        | no          |
| yqbj     | 0.332054                      | 0                               | #NAME?               | 0         | 1       | 1        | no          |
| ydhF     | 0.367591                      | 0                               | #NAME?               | 0         | 1       | 1        | no          |
| ylyA     | 0.402053                      | 0                               | #NAME?               | 0         | 1       | 1        | no          |
| yozT     | 0.408385                      | 0                               | #NAME?               | 0         | 1       | 1        | no          |
| ydfQ     | 0.409924                      | 0                               | #NAME?               | 0         | 1       | 1        | no          |
| yqcl     | 0.417329                      | 0                               | #NAME?               | 0         | 1       | 1        | no          |
| yusN     | 0.427731                      | 0                               | #NAME?               | 0         | 1       | 1        | no          |
| yezF     | 0.480224                      | 0                               | #NAME?               | 0         | 1       | 1        | no          |
| ypuC     | 0.542124                      | 0                               | #NAME?               | 0         | 1       | 1        | no          |
| yufS     | 0.572232                      | 0                               | #NAME?               | 0         | 1       | 1        | no          |
| ynfE     | 0.612129                      | 0                               | #NAME?               | 0         | 1       | 1        | no          |
| yqaF     | 0.735762                      | 0                               | #NAME?               | 0         | 1       | 1        | no          |
| yqbN     | 0.849476                      | 0                               | #NAME?               | 0         | 1       | 1        | no          |
| ydzH     | 0.849531                      | 0                               | #NAME?               | 0         | 1       | 1        | no          |
| yxex     | 0.960448                      | 0                               | #NAME?               | 0         | 1       | 1        | no          |
| yjzK     | 1.05168                       | 0                               | #NAME?               | 0         | 1       | 1        | no          |
| yrkS     | 1.43997                       | 0                               | #NAME?               | 0         | 1       | 1        | no          |
| yfmN     | 1.75735                       | 0                               | #NAME?               | 0         | 1       | 1        | no          |
